# Supplementary material for: Dual expression of Atoh1 and Ikzf2 promotes transformation of adult cochlear supporting cells into outer hair cells
Source: eLife journal article supplement (doi:10.7554/elife.66547), 2021-09-03
Supplement: supp [file elife-66547-supp-v1.zip]

Archive with 34 entries (34 files):
- elife_poa_e66547_Figure_1_figure_supplement_1.pdf
- elife_poa_e66547_Figure_1_figure_supplement_2.pdf
- elife_poa_e66547_Figure_1_figure_supplement_3.pdf
- elife_poa_e66547_Figure_3_figure_supplement_1.pdf
- elife_poa_e66547_Figure_4_figure_supplement_1.pdf
- elife_poa_e66547_Figure_4_figure_supplement_2.pdf
- elife_poa_e66547_Figure_6_figure_supplement_1.pdf
- elife_poa_e66547_Figure_6_figure_supplement_2.pdf
- elife_poa_e66547_Figure_6_figure_supplement_3.pdf
- elife_poa_e66547_Figure_6_figure_supplement_4.pdf
- elife_poa_e66547_Figure_6_figure_supplement_5.pdf
- elife_poa_e66547_Figure_6_figure_supplement_6.pdf
- elife_poa_e66547_Figure_6_figure_supplement_7.pdf
- elife_poa_e66547_Video_1.avi
- elife_poa_e66547_Supplemental_file_1.xlsx
- elife_poa_e66547_Supplemental_file_2.xlsx
- elife_poa_e66547_Supplemental_file_3.xlsx
- elife_poa_e66547_Supplemental_file_4.xlsx
- elife_poa_e66547_Supplemental_file_5.xlsx
- elife_poa_e66547_Supplemental_file_6.xlsx
- elife_poa_e66547_Supplemental_file_7.xlsx
- elife_poa_e66547_Supplemental_file_8.xlsx
- elife_poa_e66547_Supplemental_file_9.xlsx
- elife_poa_e66547_Supplemental_file_10.xlsx
- elife_poa_e66547_Figure_1_source_data_1.xlsx
- elife_poa_e66547_Figure_2_source_data_1.xlsx
- elife_poa_e66547_Figure_3_source_data_1.xlsx
- elife_poa_e66547_Figure_3_source_data_2.xlsx
- elife_poa_e66547_Figure_4_figure_supplement_2_source_data_1.xlsx
- elife_poa_e66547_Figure_4_figure_supplement_2_source_data_2.xlsx
- elife_poa_e66547_Figure_4_source_data_1.xlsx
- elife_poa_e66547_Figure_4_source_data_2.xlsx
- elife_poa_e66547_Figure_5_source_data_1.xlsx
- elife_poa_e66547_Transparent_Reporting_File.docx
