# Supplementary material for: Dual expression of Atoh1 and Ikzf2 promotes transformation of adult cochlear supporting cells into outer hair cells
Source: eLife journal article supplement (doi:10.7554/elife.66547), 2021-09-03

Figure 1-figure supplement 2

A

*Rosa26-CAG-LSL-Ikzf2/+*

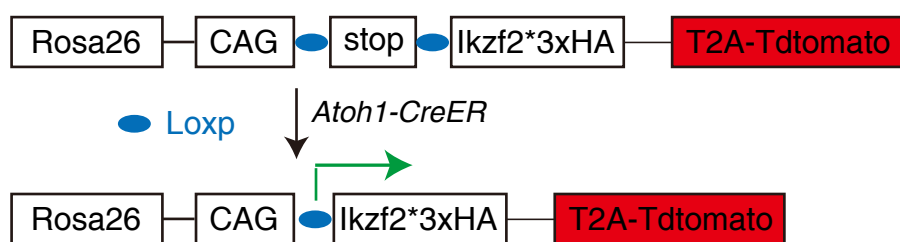

*Atoh1-CreER*<sup>+</sup>  
(CTRL)

*Atoh1-CreER*<sup>+</sup>;  
*Rosa26-CAG-LSL-Ikzf2/+*

Prestin

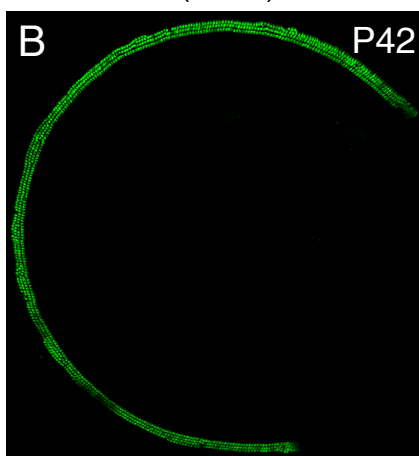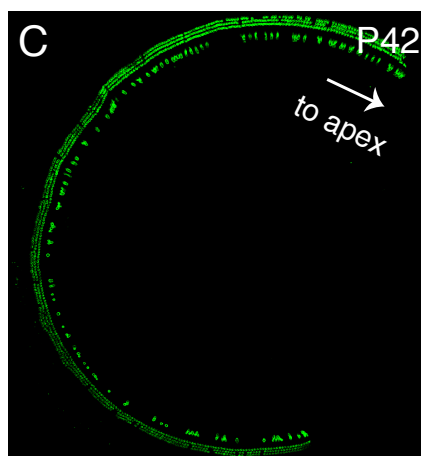

Tdtomato

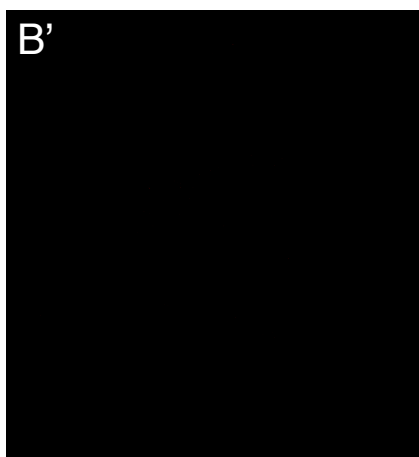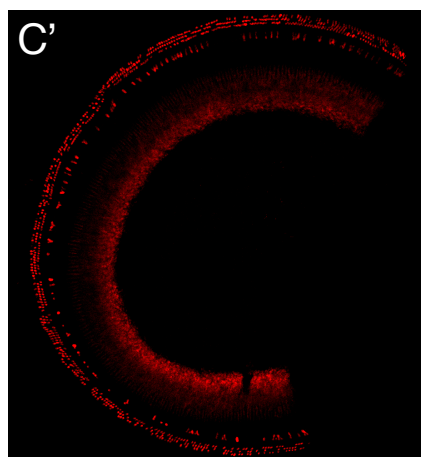

vGlut3

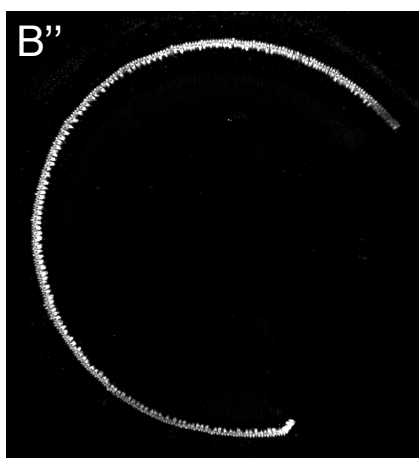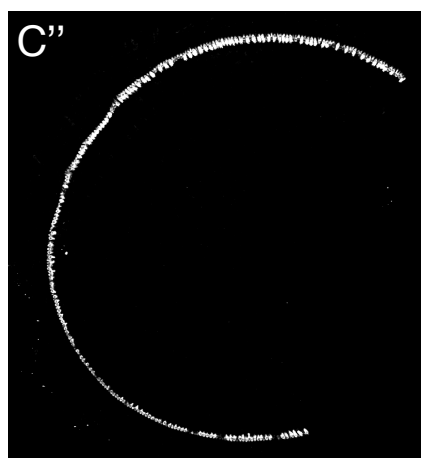

Merge + Hoechst

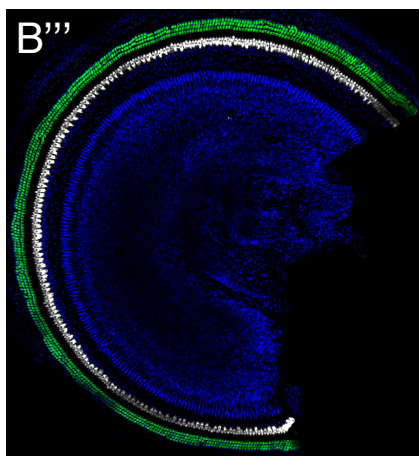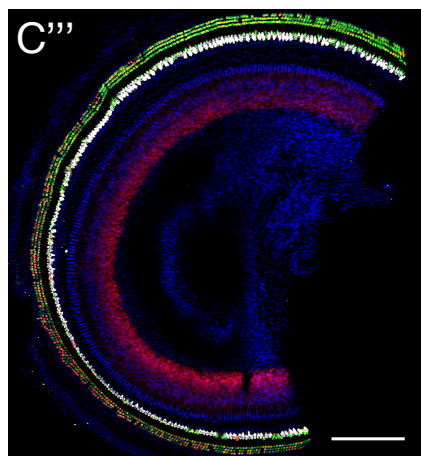

Supplement: supp [file elife-66547-supp-v1.zip › elife_poa_e66547_Figure_1_figure_supplement_2.pdf]
