# Supplementary material for: Dual expression of Atoh1 and Ikzf2 promotes transformation of adult cochlear supporting cells into outer hair cells
Source: eLife journal article supplement (doi:10.7554/elife.66547), 2021-09-03
Supplement: supp [file elife-66547-supp-v1.zip › elife_poa_e66547_Figure_1_source_data_1.xlsx]

## Sheet: Sheet1
Figure 1D
Basal (%)	Middle (%)	Apical (%)
36.3636	40.8696	82.4561
22.6519	35.2941	67.0391
33.4661	39.0756	62.7027
