# Supplementary material for: Dual expression of Atoh1 and Ikzf2 promotes transformation of adult cochlear supporting cells into outer hair cells
Source: eLife journal article supplement (doi:10.7554/elife.66547), 2021-09-03
Supplement: supp [file elife-66547-supp-v1.zip › elife_poa_e66547_Figure_2_source_data_1.xlsx]

## Sheet: Sheet1
Figure 2G
Basal	Middle	Apical
1	0	9
13	1	27
0	1	7
