# Supplementary material for: Dual expression of Atoh1 and Ikzf2 promotes transformation of adult cochlear supporting cells into outer hair cells
Source: eLife journal article supplement (doi:10.7554/elife.66547), 2021-09-03
Supplement: supp [file elife-66547-supp-v1.zip › elife_poa_e66547_Figure_3_source_data_1.xlsx]

## Sheet: Sheet2
Figure 3C
	Prestin-DTR/+
	No DT			20 ng/g DT at P36
	Replicate-1	Replicate-2	Replicate-3	Replicate-1	Replicate-2	Replicate-3
Frequency (Hz)	ABR threshold at P42
4 k	50 db	40 db	35 db	90 db	90 db	90 db
5.6 k	40 db	30 db	25 db	90 db	90 db	85 db
8 k	35 db	35 db	25 db	90 db	85 db	85 db
11.3 k	25 db	25 db	20 db	85 db	80 db	80 db
16 k	25 db	25 db	15 db	80 db	80 db	80 db
22.6 k	30 db	25 db	25 db	90 db	90 db	75 db
32 k	55 db	60 db	70 db	90 db	90 db	90 db
