# Supplementary material for: Dual expression of Atoh1 and Ikzf2 promotes transformation of adult cochlear supporting cells into outer hair cells
Source: eLife journal article supplement (doi:10.7554/elife.66547), 2021-09-03
Supplement: supp [file elife-66547-supp-v1.zip › elife_poa_e66547_Figure_3_source_data_2.xlsx]

## Sheet: Sheet2
Figure 3D
	Prestin-DTR/+
	No DT			20 ng/g DT at P36
	Replicate-1	Replicate-2	Replicate-3	Replicate-1	Replicate-2	Replicate-3
	Ratio of OHC/IHC at P42
Basal	3.22349	3.29464	3.30411	0.386364	0.052632	0.22
Middle	3.23692	3.07923	3.28583	0.137821	0.2	0.047149
Apical	3.22727	3.24242	3.15127	0.134576	0.447727	0.143541
