# Supplementary material for: Dual expression of Atoh1 and Ikzf2 promotes transformation of adult cochlear supporting cells into outer hair cells
Source: eLife journal article supplement (doi:10.7554/elife.66547), 2021-09-03
Supplement: supp [file elife-66547-supp-v1.zip › elife_poa_e66547_Figure_4_figure_supplement_2_source_data_1.xlsx]

## Sheet: Sheet1
Figure 4-figure supplement 2D
	P42				P46
	Replicate-1	Replicate-2	Replicate-3		Replicate-1	Replicate-2	Replicate-3	Replicate-4
Basal	42	2	43		92	12	3	119
Middle	128	6	64		249	25	3	195
Apical	97	9	52		228	23	3	190
