# Supplementary material for: Dual expression of Atoh1 and Ikzf2 promotes transformation of adult cochlear supporting cells into outer hair cells
Source: eLife journal article supplement (doi:10.7554/elife.66547), 2021-09-03
Supplement: supp [file elife-66547-supp-v1.zip › elife_poa_e66547_Figure_4_source_data_1.xlsx]

## Sheet: Sheet1
Figure 4H
Basal (%)	Middle (%)	Apical (%)
19.6287	32.0048	13.0053
22.1445	18.0254	12.6844
33.0882	36.8946	23.0064
