# Supplementary material for: Dual expression of Atoh1 and Ikzf2 promotes transformation of adult cochlear supporting cells into outer hair cells
Source: eLife journal article supplement (doi:10.7554/elife.66547), 2021-09-03
Supplement: supp [file elife-66547-supp-v1.zip › elife_poa_e66547_Figure_4_source_data_2.xlsx]

## Sheet: Sheet1
Figure 4I
	Fgfr3-Atoh1-Ikzf2				Fgfr3-Atoh1-Ikzf2-DTR
Basal	1	13	0		74	95	90
Middle	0	1	1		265	199	259
Apical	9	27	7		148	172	251
