# Supplementary material for: Dual expression of Atoh1 and Ikzf2 promotes transformation of adult cochlear supporting cells into outer hair cells
Source: eLife journal article supplement (doi:10.7554/elife.66547), 2021-09-03
Supplement: supp [file elife-66547-supp-v1.zip › elife_poa_e66547_Figure_5_source_data_1.xlsx]

## Sheet: Sheet1
Figure 5D	ABR at P60
	Prestin-DTR/+ (No DT)				Prestin-DTR/+ (DT)						Fgfr3-Atoh1-Ikzf2-DTR (DT
Frequency (Hz)	Replicate-1	Replicate-2	Replicate-3		Replicate-1	Replicate-2	Replicate-3	Replicate-4	Replicate-5		Replicate-1	Replicate-2	Replicate-3	Replicate-4	Replicate-5	Replicate-6
4 k	45 db	40 db	45 db		80 db	80 db	85 db	90 db	90 db		80 db	75 db	90 db	75 db	80 db	85 db
5.6 k	35 db	25 db	30 db		80 db	75 db	75 db	80 db	90 db		75 db	80 db	80 db	75 db	85 db	85 db
8 k	25 db	20 db	20 db		85 db	70 db	80 db	75 db	85 db		85 db	85 db	75 db	70 db	85 db	85 db
11.3 k	25 db	20 db	15 db		75 db	70 db	80 db	70 db	80 db		80 db	85 db	80 db	75 db	75 db	80 db
16 k	20 db	20 db	15 db		85 db	75 db	85 db	60 db	90 db		65 db	85 db	85 db	70 db	65 db	90 db
22.6 k	20 db	25 db	15 db		80 db	80 db	85 db	65 db	90 db		80 db	75 db	70 db	75 db	75 db	85 db
32 k	35 db	60 db	30 db		85 db	85 db	85 db	75 db	90 db		85 db	80 db	80 db	70 db	75 db	90 db
