# Supplementary material for: Dual expression of Atoh1 and Ikzf2 promotes transformation of adult cochlear supporting cells into outer hair cells
Source: eLife journal article supplement (doi:10.7554/elife.66547), 2021-09-03
Supplement: supp [file elife-66547-supp-v1.zip › elife_poa_e66547_Supplemental_file_1.xlsx]

## Sheet: P30 OHC-enriched genes
Gene	baseMean	log2 Fold Change	lfcSE	stat	pvalue	padj		Figure 6-figure supplement 1A
Ocm	47308	21.4164	1.36937	15.6396	3.91276e-55	1.90899e-53		All genes were listed that were expressed in a much higher level in P30_WT OHCs than in P60_WT SCs
Calm1	42235.2	3.19547	0.324958	9.83349	8.07686e-23	1.2634e-21
Calm2	18694	2.42617	0.291446	8.3246	8.46175e-17	1.02145e-15
Cib2	15137	4.95456	0.495491	9.9993	1.5347e-23	2.47135e-22
Hsp90aa1	11134.3	2.08554	0.256644	8.1262	4.42946e-16	5.20144e-15
Selenow	10216.3	6.06184	0.325027	18.6503	1.25603e-77	1.23294e-75
Lhfpl5	7149.45	9.5801	1.09489	8.74985	2.13631e-18	2.80164e-17
Calb2	6719.56	28.4686	1.16857	24.3618	4.34576e-131	2.8496e-128
Plbd1	5955.85	26.48	1.41012	18.7785	1.133e-78	1.11887e-76
Acbd7	5861.19	4.88403	0.915604	5.33421	9.59597e-08	6.72538e-07
Tspan13	4949.33	2.28425	0.483919	4.72032	2.35473e-06	1.4858e-05
Krt7	4768.57	14.3928	1.32651	10.8502	1.99095e-27	3.77751e-26
Sri	4712.85	3.45158	0.515681	6.69324	2.18283e-11	1.97152e-10
Ppp1r27	4601.06	5.61366	1.40888	3.98449	6.76251e-05	0.000376939
Reep5	4533.72	2.04836	0.328038	6.24425	4.2583e-10	3.52913e-09
Calml4	4419.26	31.4875	1.13325	27.785	6.58033e-170	3.59571e-166
Ppp1r17	4170.46	24.4975	1.32679	18.4637	4.04349e-76	3.80948e-74
Rn7sk	3912.54	5.83424	0.538396	10.8363	2.31578e-27	4.37358e-26
Triobp	3820.86	2.70438	0.469457	5.76065	8.3789e-09	6.28629e-08
Kcna10	3550.85	32.5372	1.54508	21.0586	1.9079e-98	4.17015e-96
Ppp1cb	3456.17	3.08013	0.467277	6.59166	4.34922e-11	3.85933e-10
Efr3a	3423.13	3.9684	0.510088	7.77983	7.26214e-15	7.94715e-14
Espn	3206.49	14.472	0.610956	23.6874	4.86523e-124	2.34576e-121
Prdx5	3203.14	2.2565	0.333722	6.76161	1.36471e-11	1.25121e-10
Pitpna	3119.16	2.46781	0.452171	5.45771	4.82327e-08	3.45878e-07
Pls1	3036.43	3.52759	0.602362	5.85626	4.73404e-09	3.62133e-08
Pkig	2954.63	4.76967	0.383152	12.4485	1.42493e-35	3.59922e-34
Slc26a5	2856.27	17.4008	1.04633	16.6303	4.20149e-62	2.56041e-60
Lrrc10b	2850.17	14.4738	0.922722	15.686	1.88712e-55	9.28995e-54
Chrna9	2842.36	14.3747	0.951067	15.1143	1.3037e-51	5.74506e-50
Myo7a	2832.99	14.2636	0.864293	16.5032	3.4784e-61	2.04378e-59
Lmo7	2812.09	31.9744	1.17264	27.267	1.04595e-163	3.42926e-160
Pvalb	2702.05	29.9772	1.46321	20.4872	2.79785e-93	4.82791e-91
Atp6v1b2	2660.86	3.07968	0.644264	4.78015	1.75164e-06	1.11297e-05
Dctn3	2581.77	2.31604	0.364738	6.34989	2.15469e-10	1.83299e-09
Myo15	2510.45	9.66646	1.72811	5.59365	2.22348e-08	1.63231e-07
Gm28437	2501.05	3.44589	0.502813	6.85323	7.22033e-12	6.72134e-11
Psmd6	2396.69	2.43497	0.48065	5.066	4.06264e-07	2.70507e-06
Nf2	2387.58	2.52868	0.50439	5.01335	5.34899e-07	3.52011e-06
Efcab14	2385.4	2.6336	0.530403	4.96528	6.86014e-07	4.48577e-06
Ikzf2	2371.71	2.16977	0.540811	4.01207	6.01892e-05	0.000336751
Smpx	2337.62	7.27296	1.05811	6.87355	6.26249e-12	5.8563e-11
Dmpk	2213.01	4.59269	1.13382	4.05064	5.10768e-05	0.000287832
Wbp1	2198.94	2.3274	0.519302	4.48179	7.40206e-06	4.5075e-05
Tmc1	2176.55	36.3109	1.54342	23.5262	2.202e-122	1.03135e-119
Mkrn2os	2172.55	6.32276	0.930034	6.79841	1.05778e-11	9.78563e-11
Gm5737	2171.95	31.9072	1.66171	19.2015	3.59799e-82	3.93213e-80
Aplp1	2114.64	28.345	1.17965	24.0284	1.40475e-127	7.42843e-125
Strip2	2114.16	31.6949	1.42657	22.2176	2.32218e-109	7.46423e-107
Gm45716	2110.27	5.97249	1.36549	4.37389	1.2205e-05	7.28344e-05
Calb1	2084.54	30.0188	1.43807	20.8743	9.16632e-97	1.87829e-94
Mcoln3	2028.53	5.50407	1.12238	4.90393	9.39382e-07	6.08668e-06
Ush2a	2004.59	25.9039	1.7007	15.2313	2.19276e-52	1.00128e-50
Gltp	1999.48	2.53983	0.463731	5.47694	4.3274e-08	3.11546e-07
Mlxip	1944.79	2.29593	0.463856	4.94967	7.43406e-07	4.85138e-06
Heyl	1932.2	25.7328	1.11146	23.1522	1.38119e-118	6.1194e-116
Stard10	1929.57	4.23576	0.664078	6.37841	1.78934e-10	1.52854e-09
Rnf11	1920.63	2.53276	0.407923	6.2089	5.33559e-10	4.38208e-09
Dst	1909.22	2.54943	0.490235	5.20042	1.98834e-07	1.35586e-06
Cabp2	1887.02	6.80341	1.31646	5.16795	2.36673e-07	1.60388e-06
Magi3	1857.12	4.14625	0.823467	5.03511	4.77562e-07	3.15672e-06
Gm6558	1818.13	31.175	1.37029	22.7506	1.41512e-114	5.3949e-112
Pxdc1	1811.13	5.1154	0.882666	5.79539	6.81611e-09	5.14915e-08
Nhlrc2	1783.36	3.82868	0.728419	5.25615	1.47104e-07	1.01579e-06
Olfm1	1771.15	6.66138	1.41697	4.70115	2.58702e-06	1.62611e-05
Ap3b2	1698.46	16.5589	1.73008	9.57115	1.0572e-21	1.57122e-20
Grxcr2	1697.97	31.2795	2.01741	15.5048	3.21869e-54	1.52939e-52
Limd2	1670.19	4.57504	1.0481	4.36508	1.27079e-05	7.56702e-05
B230219D22Rik	1665.58	2.94028	0.406014	7.24181	4.42727e-13	4.43078e-12
Ablim2	1637.76	14.2109	1.02794	13.8246	1.81137e-43	5.90333e-42
Atp2b2	1634.84	6.837	1.1988	5.7032	1.17579e-08	8.75722e-08
Osbpl9	1620.65	2.35955	0.385496	6.12081	9.31008e-10	7.5368e-09
Usp46	1577.08	2.67183	0.587934	4.54443	5.50845e-06	3.39729e-05
Syne4	1565.09	30.8474	1.24697	24.7378	4.19044e-135	3.81632e-132
Dpysl2	1562.85	6.22614	1.00054	6.22279	4.88379e-10	4.0211e-09
Loxhd1	1554.08	29.8211	1.24792	23.8967	3.31751e-126	1.6995e-123
Dner	1552.57	30.7418	1.24326	24.7269	5.50048e-135	4.74575e-132
Grp	1528.82	26.5663	1.3104	20.2734	2.20744e-91	3.38192e-89
Aftph	1527.99	2.72441	0.604481	4.50702	6.57452e-06	4.02e-05
Abca5	1498.35	4.88857	0.863039	5.66437	1.47564e-08	1.09557e-07
Mreg	1467.72	7.72427	0.720902	10.7147	8.68187e-27	1.59912e-25
Cdc25b	1464.89	24.7825	1.27609	19.4206	5.16897e-84	5.84379e-82
Chst2	1453.39	31.702	1.37984	22.975	8.28626e-117	3.39592e-114
Six4	1438.16	5.15331	0.968647	5.32012	1.037e-07	7.23387e-07
Car7	1436.54	9.32578	1.68208	5.54419	2.95326e-08	2.15359e-07
Sh3glb2	1433.79	2.92491	0.563997	5.18605	2.14803e-07	1.46171e-06
AI593442	1424.95	31.3305	1.70293	18.398	1.36312e-75	1.26246e-73
Ccz1	1416.88	2.3876	0.51799	4.60936	4.03907e-06	2.51281e-05
Nrsn1	1408.62	27.5375	1.58041	17.4243	5.39582e-68	3.93127e-66
Homer2	1394.93	6.43122	1.5203	4.23023	2.33448e-05	0.000135803
Tmem183a	1383.49	2.75224	0.709302	3.88021	0.000104368	0.000568304
Cpe	1374.95	7.33575	1.72762	4.24617	2.17457e-05	0.00012677
Sh3gl3	1374.66	30.6116	1.44928	21.122	4.99744e-99	1.15385e-96
Mgat4b	1367.26	2.42525	0.611229	3.96783	7.25302e-05	0.00040291
Kif5c	1333.26	28.7913	1.19804	24.0321	1.28522e-127	7.02285e-125
Mpdz	1320.47	3.10213	0.803139	3.86251	0.000112226	0.000608776
Cacna1d	1268.75	14.6766	1.13576	12.9223	3.37058e-38	9.16318e-37
Eya2	1262.21	20.7796	1.45533	14.2783	2.98651e-46	1.06662e-44
Srpk1	1259.76	2.48217	0.554013	4.48034	7.45254e-06	4.53656e-05
Endod1	1251.9	4.90252	0.911484	5.37862	7.50604e-08	5.30144e-07
Arfgef1	1248.65	3.14076	0.593979	5.28765	1.23896e-07	8.59514e-07
Rab3b	1231.22	4.81716	1.24124	3.88092	0.000104062	0.000566927
Kncn	1230.11	30.9081	1.92063	16.0927	2.87176e-58	1.57447e-56
Strc	1228.35	8.03755	1.06339	7.55845	4.07895e-14	4.2918e-13
Pcp4	1204.53	31.0633	1.75387	17.7113	3.43096e-70	2.71709e-68
Osbpl1a	1199.09	29.8368	1.43453	20.799	4.41598e-96	8.72183e-94
Slc38a1	1166.86	4.72864	1.12357	4.20859	2.56968e-05	0.000148693
Card19	1164.81	3.94033	0.677286	5.81782	5.96208e-09	4.52483e-08
Tbc1d7	1147.83	4.4372	1.07627	4.12275	3.74377e-05	0.000213839
Pou4f3	1140.79	29.9275	1.97302	15.1684	5.72668e-52	2.56496e-50
Lrtm2	1135.51	14.0175	1.20977	11.587	4.79835e-31	1.03363e-29
Dtna	1119.82	3.45198	0.884466	3.9029	9.50457e-05	0.000521447
Miat	1117.55	28.2541	1.26639	22.3107	2.90774e-110	9.72788e-108
Rassf4	1103.46	24.336	1.31688	18.4801	2.9868e-76	2.84666e-74
Sdcbp	1090.86	5.60144	1.37823	4.06422	4.81932e-05	0.000272143
Map1b	1071.86	11.1032	1.06234	10.4516	1.44079e-25	2.54787e-24
Dusp14	1058.69	13.2711	1.51684	8.74914	2.14989e-18	2.8172e-17
Twf2	1042.65	4.53619	1.1179	4.05778	4.95415e-05	0.000279468
Usp48	1042.52	2.29382	0.55571	4.12774	3.66352e-05	0.000209328
Pgm2l1	1033.53	4.0117	1.03118	3.89039	0.000100083	0.000547069
Megf6	1031.9	26.674	1.29814	20.5479	8.03562e-94	1.44756e-91
Snap91	1028.98	30.8096	1.94354	15.8523	1.35592e-56	7.01184e-55
Fcrlb	1012.01	31.1631	1.37988	22.5839	6.23873e-113	2.2727e-110
Kif13a	1008.74	5.8019	1.13475	5.11293	3.17201e-07	2.13197e-06
Epha5	1006.63	19.214	1.4192	13.5386	9.2507e-42	2.81348e-40
Trim16	996.948	5.18624	1.38261	3.75105	0.000176097	0.000931812
Akap8	989.244	2.08156	0.516719	4.02842	5.61525e-05	0.000315243
Usp25	983.548	3.68778	0.825741	4.46602	7.96863e-06	4.83277e-05
Gm1673	981.913	6.2475	0.642162	9.72886	2.27132e-22	3.48958e-21
Atp8a1	981.88	4.29669	0.748221	5.74254	9.3267e-09	6.9814e-08
Ckmt1	978.953	29.3436	1.08672	27.002	1.39961e-160	3.82396e-157
Chrna10	978.526	30.5423	2.12346	14.3833	6.58934e-47	2.4274e-45
Lbh	967.017	5.90714	1.30832	4.51507	6.32951e-06	3.88032e-05
Tcf4	960.335	4.66529	0.869849	5.36333	8.17023e-08	5.75074e-07
Rbm24	959.656	7.17471	1.40269	5.11495	3.13816e-07	2.11009e-06
Apba1	932.091	9.07339	1.51061	6.00645	1.89627e-09	1.49378e-08
Lrba	926.916	2.19526	0.50371	4.35818	1.31148e-05	7.79802e-05
Dnm3	924.115	9.71328	1.89323	5.13054	2.88916e-07	1.94585e-06
Cotl1	918.959	24.9689	1.21741	20.5098	1.7605e-93	3.10321e-91
Jag2	917.829	26.3501	1.24905	21.0961	8.63497e-99	1.96117e-96
Tmem255b	917.626	25.9579	1.46996	17.6589	8.68669e-70	6.781e-68
Ppp2r1b	892.016	4.05026	1.0544	3.84129	0.00012239	0.0006602
Snap25	885.738	29.0005	1.37138	21.147	2.94189e-99	6.88949e-97
Zmiz1	885.511	4.25966	0.873973	4.8739	1.09416e-06	7.06167e-06
Srd5a1	884.701	13.6657	1.13617	12.0279	2.5341e-33	5.9176e-32
Gpam	878.484	4.15102	1.05312	3.94165	8.09246e-05	0.000447419
Ttc7	877.308	5.89946	1.12826	5.22882	1.70592e-07	1.17156e-06
Barhl1	872.632	27.9781	1.07091	26.1254	1.87566e-150	3.4164e-147
Dytn	864.43	30.7077	1.78797	17.1746	4.11188e-66	2.83218e-64
Timp2	855.118	25.0213	1.30859	19.1209	1.69323e-81	1.76797e-79
Gm29216	853.456	2.11474	0.546838	3.86722	0.000110083	0.000598139
Gm28661	840.285	3.40676	0.50583	6.73499	1.63937e-11	1.4897e-10
Arf3	834.881	3.54712	0.780775	4.54308	5.54385e-06	3.41784e-05
Rundc3a	834.377	28.3075	1.02902	27.5091	1.3669e-166	5.60189e-163
Gldn	833.366	22.4352	2.32854	9.6349	5.69447e-22	8.54066e-21
Elmod1	828.241	30.2079	1.73228	17.4382	4.22918e-68	3.09504e-66
Kcp	828.13	6.10394	1.6338	3.73603	0.000186947	0.000984777
Anxa6	823.186	28.6037	1.16044	24.649	3.77127e-134	2.94392e-131
Slc39a2	808.578	24.4246	1.61848	15.091	1.85549e-51	8.11123e-50
Madd	799.461	6.43914	1.00056	6.43551	1.2306e-10	1.06427e-09
Spock2	794.533	7.44428	1.02882	7.23576	4.62942e-13	4.6218e-12
Ube2e2	792.664	2.7746	0.713237	3.89015	0.000100184	0.000547272
Cdh23	791.014	6.41687	1.24813	5.14119	2.72997e-07	1.84242e-06
Gm32742	787.843	31.0159	1.88724	16.4345	1.08297e-60	6.25108e-59
Epn3	774.172	5.26937	1.03414	5.09543	3.47941e-07	2.32903e-06
Btbd9	769.082	3.66236	0.548747	6.67405	2.48833e-11	2.23881e-10
Pla2g7	764.834	14.4439	1.54216	9.36601	7.53298e-21	1.08228e-19
Slk	747.553	4.04888	0.935763	4.32682	1.51277e-05	8.93652e-05
Tnc	747.256	22.2743	1.75266	12.7088	5.28303e-37	1.39012e-35
Ldha	736.462	11.3348	1.3479	8.40928	4.12534e-17	5.06567e-16
Gars	728.947	3.37616	0.899324	3.75411	0.000173958	0.000921387
Fgf21	722.712	21.4056	1.57976	13.5499	7.93743e-42	2.42306e-40
Lama5	717.743	4.30016	0.883483	4.86729	1.13141e-06	7.28772e-06
Otof	716.491	8.73793	1.6627	5.25526	1.47819e-07	1.02029e-06
Lhx3	686.97	26.1485	1.62992	16.0428	6.42402e-58	3.47555e-56
Cd83	677.752	14.7589	2.27655	6.48301	8.99086e-11	7.86485e-10
H2bu2	666.667	6.76216	1.26294	5.35431	8.58837e-08	6.03727e-07
Actr3b	663.539	26.5433	1.29552	20.4885	2.72823e-93	4.75786e-91
Akr1b3	663.258	6.27348	1.5547	4.03518	5.4561e-05	0.000306728
Olfml3	659.785	24.3082	3.01108	8.07292	6.86339e-16	7.95134e-15
C9orf72	641.884	4.94644	0.856077	5.77803	7.55783e-09	5.68328e-08
Ccdc88c	641.545	9.69663	0.972053	9.97542	1.95282e-23	3.12929e-22
Runx1t1	635.176	12.436	1.0185	12.2102	2.74313e-34	6.58755e-33
Neurl1a	620.674	5.49951	1.26046	4.36309	1.28241e-05	7.63068e-05
Upf2	605.156	2.26462	0.518454	4.36802	1.25378e-05	7.47115e-05
Smim18	598.707	8.02487	1.20621	6.65294	2.8729e-11	2.57634e-10
Clrn1	596.383	7.11166	1.89247	3.75788	0.000171359	0.000907916
Ccdc68	585.203	4.4805	1.17081	3.82683	0.000129804	0.000697681
Nrxn3	579.045	26.2576	1.65459	15.8695	1.03e-56	5.34328e-55
Map2	573.646	13.0316	0.955764	13.6348	2.48682e-42	7.75028e-41
Hsd17b14	573.391	9.90899	1.33927	7.39882	1.37403e-13	1.41574e-12
Ccer2	573.083	9.90163	1.79122	5.52788	3.24123e-08	2.35416e-07
Kalrn	570.141	5.38012	1.27361	4.2243	2.39681e-05	0.000139231
Fabp5	567.582	23.1093	1.32514	17.4392	4.16018e-68	3.0582e-66
Olah	562.486	23.7594	2.45197	9.68991	3.32821e-22	5.07057e-21
Acvr1c	557.997	7.39123	1.46772	5.03587	4.75688e-07	3.14561e-06
Pjvk	546.882	25.5464	2.01279	12.692	6.54504e-37	1.71669e-35
Cables1	537.39	9.31612	1.43502	6.49199	8.47081e-11	7.41388e-10
Impdh1	536.423	24.6707	1.68071	14.6787	8.82633e-49	3.47813e-47
Gfi1	535.474	29.174	1.39485	20.9155	3.87266e-97	8.13903e-95
Nav2	529.004	25.6633	1.25422	20.4616	4.74034e-93	8.01118e-91
Bex2	525.012	14.0658	1.19324	11.788	4.50182e-32	1.00406e-30
Faim2	523.958	14.9155	1.53336	9.72731	2.30614e-22	3.53645e-21
Casc4	518.224	11.7458	1.0483	11.2046	3.87018e-29	7.67156e-28
Plce1	517.79	29.5946	1.97446	14.9887	8.70426e-51	3.70621e-49
Coro2a	517.205	20.0408	1.40026	14.3122	1.83631e-46	6.64518e-45
Tmem238	517.139	2.67325	0.606225	4.40966	1.03533e-05	6.22146e-05
Ssbp3	504.487	3.61693	0.765784	4.72317	2.32192e-06	1.46623e-05
Pfkfb2	501.497	5.01689	1.0914	4.59676	4.2912e-06	2.6636e-05
Fscn2	500.517	29.8607	1.85713	16.079	3.58156e-58	1.95708e-56
Camk2n1	493.779	2.73905	0.681425	4.0196	5.82975e-05	0.000326837
Fam20c	485.164	3.93714	1.05328	3.73797	0.000185514	0.000978168
Gse1	483.318	3.45291	0.636074	5.42847	5.68392e-08	4.06175e-07
Osbpl11	479.756	4.22626	0.881993	4.79172	1.6536e-06	1.05231e-05
Inka2	468.05	17.1518	1.34638	12.7392	3.58053e-37	9.43658e-36
AA465934	467.486	8.0802	1.21544	6.64798	2.97141e-11	2.66177e-10
Adamtsl1	467.038	26.5118	1.62441	16.3209	7.00518e-60	3.98736e-58
Tjap1	465.322	5.29977	1.2672	4.18226	2.88631e-05	0.000166544
Plekhg5	464.411	10.8861	1.07465	10.1299	4.06859e-24	6.73701e-23
Cdc42se2	461.285	24.9041	1.40851	17.6811	5.85917e-70	4.59567e-68
Defb25	460.649	27.587	1.77654	15.5285	2.22585e-54	1.06071e-52
Gm44401	459.754	27.8594	1.43618	19.3983	7.98298e-84	8.90238e-82
Flrt1	457.279	5.25793	1.36608	3.84892	0.000118638	0.000641015
Ptpru	456.912	7.44457	1.25571	5.92856	3.05598e-09	2.372e-08
Gm15772	455.707	5.80912	0.48501	11.9773	4.67177e-33	1.08323e-31
Tmie	454.458	28.5003	1.14263	24.9426	2.56648e-137	2.62952e-134
Grxcr1	453.85	28.4429	1.99337	14.2688	3.42635e-46	1.21314e-44
Ank	449.24	4.95004	1.24101	3.98871	6.64325e-05	0.00037067
Atp1a1	448.83	4.07661	1.00622	4.0514	5.09123e-05	0.000287003
Rgs11	443.526	28.263	1.55197	18.211	4.21996e-74	3.73934e-72
Laptm5	441.608	8.4548	1.62184	5.21309	1.85725e-07	1.27017e-06
Mbd2	440.816	3.5552	0.76166	4.6677	3.04595e-06	1.90799e-05
Rgs12	439.52	13.8742	1.29642	10.702	9.96314e-27	1.83101e-25
Jmy	438.519	4.3522	1.0035	4.33701	1.44433e-05	8.55686e-05
Cln6	435.473	4.90095	1.02485	4.7821	1.73477e-06	1.10268e-05
Fez1	434.559	28.5525	1.53103	18.6492	1.28212e-77	1.25106e-75
Xirp2	434.546	14.5133	2.08246	6.96927	3.18584e-12	3.02231e-11
Mob3b	431.633	27.7226	1.33305	20.7964	4.66734e-96	9.10854e-94
Slc1a5	429.212	14.0466	1.60851	8.73271	2.48633e-18	3.23993e-17
Umodl1	427.9	14.2633	1.80457	7.904	2.70093e-15	3.02022e-14
Atp8a2	418.677	28.9055	1.69091	17.0946	1.62881e-65	1.09881e-63
Ctsc	417.705	26.6741	1.65736	16.0944	2.79366e-58	1.54197e-56
Klhdc7b	413.867	28.6818	1.32289	21.6811	3.09447e-104	8.316e-102
Gpr156	412.181	30.2416	1.94104	15.5801	9.93882e-55	4.79197e-53
Fcho1	411.074	28.1169	1.53958	18.2627	1.64105e-74	1.49454e-72
Ptprq	407.701	29.2414	2.00294	14.5993	2.83933e-48	1.10296e-46
Ptpn3	402.8	4.04084	0.948361	4.26087	2.03632e-05	0.000118965
Rncr4	402.118	6.89201	1.12821	6.10881	1.0038e-09	8.07818e-09
Dlg2	401.953	5.11616	1.18807	4.30629	1.66015e-05	9.77896e-05
Fgf9	400.544	25.0417	1.64988	15.1779	4.95178e-52	2.22396e-50
Nfatc1	399.395	4.38019	1.12227	3.90297	9.50188e-05	0.000521447
Lasp1	394.571	28.7983	1.58212	18.2023	4.9489e-74	4.36168e-72
Mgat5b	387.756	27.255	1.2863	21.1887	1.21354e-99	2.9692e-97
C1ql1	383.953	13.01	1.60426	8.10968	5.07516e-16	5.92994e-15
Plec	383.512	6.51295	1.09594	5.94282	2.80158e-09	2.18177e-08
Eif2s3y	374.671	27.8649	2.37391	11.7379	8.14371e-32	1.79919e-30
Bcr	374.131	7.391	1.14459	6.45734	1.0656e-10	9.2621e-10
Angpt1	373.74	24.4167	1.94253	12.5695	3.10564e-36	8.00483e-35
Osbpl3	370.875	28.9282	2.00234	14.4472	2.61138e-47	9.79595e-46
Ppp1r1a	368.44	29.422	1.91617	15.3546	3.30128e-53	1.54622e-51
Erich3	367.486	28.2507	1.06442	26.541	3.26186e-155	6.68395e-152
Ccdc74a	366.714	8.09737	1.40954	5.74471	9.20794e-09	6.8988e-08
Paqr9	366.014	12.9397	1.27999	10.1092	5.03045e-24	8.27953e-23
Smoc2	365.733	28.4055	2.33342	12.1733	4.31053e-34	1.02707e-32
Ankfn1	365.239	28.0546	1.23148	22.7812	7.03803e-115	2.74701e-112
Gpsm2	360.751	6.46313	1.51105	4.27724	1.89226e-05	0.000110983
Gas6	360.537	26.7294	1.28986	20.7227	2.16216e-95	4.12143e-93
Pdzd7	358.507	10.5065	1.51422	6.9386	3.96008e-12	3.74165e-11
Ica1l	356.501	27.9885	1.37246	20.393	1.92983e-92	3.19552e-90
Disp2	355.837	26.1033	1.82871	14.2741	3.17157e-46	1.12536e-44
Slc18a1	352.788	11.5852	1.52167	7.61349	2.66799e-14	2.85113e-13
Zfp365	352.302	12.8847	1.58819	8.11281	4.94613e-16	5.79157e-15
Wnt4	348.751	7.03472	1.36287	5.16168	2.44742e-07	1.65719e-06
Sting1	347.156	14.4144	1.70839	8.4374	3.24467e-17	4.01433e-16
Slc22a23	347.029	28.1268	1.30114	21.6171	1.23974e-103	3.22589e-101
Arxes2	344.222	12.1885	1.51565	8.04173	8.85758e-16	1.02183e-14
Dyrk1a	343.975	2.75136	0.715088	3.84758	0.00011929	0.000644109
Gipc3	339.99	11.5399	1.01343	11.3869	4.85861e-30	1.00438e-28
Rnf150	339.223	28.8549	1.44236	20.0053	4.95242e-89	7.1215e-87
Nop2	334.673	6.00828	1.42343	4.22099	2.43228e-05	0.000141191
Btbd11	333.269	23.0885	1.41541	16.3122	8.0872e-60	4.58732e-58
D930020B18Rik	325.455	25.2257	1.48937	16.9372	2.39278e-64	1.569e-62
Necab2	324.75	28.0366	1.84187	15.2218	2.53603e-52	1.15481e-50
Fam57b	324.749	28.4079	1.40455	20.2256	5.82887e-91	8.76629e-89
Actn3	321.085	22.3487	1.9234	11.6194	3.28575e-31	7.10598e-30
Gata2	319.928	6.75006	1.58011	4.27188	1.93828e-05	0.000113601
Nebl	319.922	28.7648	1.82334	15.7759	4.55959e-56	2.30695e-54
Kcnh2	319.459	28.8532	1.48941	19.3723	1.32329e-83	1.46573e-81
Lctl	319.37	15.5101	2.07574	7.47208	7.89377e-14	8.22125e-13
Zcchc12	318.478	25.3605	2.19893	11.5331	8.98259e-31	1.90002e-29
Dusp10	317.699	5.77152	1.48479	3.88711	0.000101445	0.000553409
Serf1	316.861	2.92781	0.702893	4.16537	3.10851e-05	0.000179051
Tmem191c	308.497	28.1834	1.40283	20.0904	8.9468e-90	1.30951e-87
Plin5	308.458	9.41778	2.13822	4.40451	1.06025e-05	6.36188e-05
Misp3	307.282	28.2521	1.54815	18.2489	2.11001e-74	1.90052e-72
Gm17322	303.865	26.3208	1.84123	14.2953	2.34164e-46	8.41811e-45
Galnt13	301.843	29.2445	1.50477	19.4346	3.9377e-84	4.51403e-82
Plekhb2	300.132	24.0973	1.66433	14.4787	1.65133e-47	6.2518e-46
Slc6a11	298.958	20.7018	1.5528	13.3319	1.50994e-40	4.43593e-39
Srrm4	298.232	24.6805	1.74019	14.1826	1.17426e-45	4.08696e-44
Chgb	297.879	24.7757	2.26423	10.9422	7.2389e-28	1.38955e-26
Mapk12	297.218	23.863	1.45413	16.4105	1.60878e-60	9.25361e-59
Ubash3b	295.153	7.94671	1.42697	5.56893	2.56306e-08	1.87405e-07
Ak1	293.031	28.7835	1.87575	15.345	3.82314e-53	1.78555e-51
Aldh18a1	291.368	11.5048	1.29057	8.91452	4.89945e-19	6.55647e-18
Ncald	289.893	26.6398	1.55111	17.1747	4.11114e-66	2.83218e-64
Mical2	288.988	12.235	1.1847	10.3275	5.29372e-25	9.08691e-24
Pdgfra	288.53	29.1609	1.81815	16.0388	6.85181e-58	3.68268e-56
Rims2	287.409	16.2339	1.47933	10.9739	5.10488e-28	9.85681e-27
Sh2d4b	287.215	8.20423	1.29052	6.35732	2.05307e-10	1.74928e-09
Zfp618	285.102	27.5521	1.36302	20.214	7.3671e-91	1.0979e-88
Galnt14	278.822	26.2606	1.57982	16.6225	4.78783e-62	2.89619e-60
Plscr5	277.654	29.6256	2.21428	13.3793	7.98954e-41	2.377e-39
Gm4825	277.402	28.5852	1.5182	18.8283	4.42902e-79	4.4003e-77
Elf3	277.228	22.7136	2.88757	7.866	3.66155e-15	4.06941e-14
Chrna1	274.659	26.6628	1.84868	14.4226	3.72781e-47	1.38571e-45
Sh3pxd2a	273.886	7.37301	1.00665	7.32434	2.40078e-13	2.43539e-12
H2ac6	273.689	9.36393	1.78716	5.23957	1.60948e-07	1.10765e-06
Gtf3c4	272.588	10.2748	1.33071	7.7213	1.15146e-14	1.24594e-13
Lmod3	269.748	28.3723	1.77078	16.0224	8.91e-58	4.75771e-56
Sult4a1	269.742	26.291	1.51819	17.3174	3.47997e-67	2.48031e-65
Gdap1	269.426	27.7279	1.50289	18.4497	5.24181e-76	4.88233e-74
Pdzrn3	263.428	24.8349	2.21745	11.1998	4.0881e-29	8.09375e-28
Atp6v1c2	262.394	11.1776	2.04938	5.45413	4.92138e-08	3.52606e-07
A530016L24Rik	260.575	12.4508	1.56539	7.95383	1.8083e-15	2.04297e-14
Eid2	259.68	26.6269	1.35888	19.5947	1.71667e-85	2.11589e-83
Ndufs5-ps	257.856	3.76558	0.571268	6.59162	4.35066e-11	3.85933e-10
Chchd10	257.262	3.30228	0.688646	4.79532	1.62411e-06	1.03435e-05
Tcerg1l	255.763	25.5258	2.0761	12.2951	9.62691e-35	2.35895e-33
Adm	253.612	15.5538	2.48696	6.25416	3.99655e-10	3.31891e-09
Tnfrsf21	251.591	6.32325	1.69271	3.73558	0.00018728	0.000986215
Ddx3y	251.459	26.5321	2.79893	9.47938	2.55795e-21	3.73065e-20
Elovl2	248.804	28.7273	1.82985	15.6993	1.52989e-55	7.5769e-54
Sema3a	244.689	13.3662	1.61476	8.27747	1.2582e-16	1.50443e-15
Nup210	243.739	5.38593	1.17027	4.60231	4.17825e-06	2.59841e-05
CT010467.2	242.817	2.60623	0.592032	4.40217	1.07175e-05	6.42384e-05
Zfp385a	242.606	5.13273	1.2532	4.09571	4.20868e-05	0.000239061
Ly6g6c	236.429	16.3299	2.32166	7.0337	2.01134e-12	1.93384e-11
Gnao1	235.843	27.0317	1.36695	19.7753	4.86151e-87	6.427e-85
Sybu	232.758	7.38199	1.61875	4.56029	5.10821e-06	3.15996e-05
Shroom2	227.845	6.87409	1.28796	5.33718	9.44007e-08	6.62178e-07
Mboat2	226.619	28.4323	1.77052	16.0588	4.96153e-58	2.69319e-56
Fbxl16	226.035	24.6809	1.63423	15.1025	1.55945e-51	6.85365e-50
Pcsk5	225.186	8.34952	1.87936	4.44275	8.88182e-06	5.36476e-05
Bend4	224.865	8.74024	1.5581	5.60954	2.02868e-08	1.49131e-07
Robo2	222.853	26.3057	2.12211	12.396	2.74701e-35	6.87508e-34
Lrrc30	221.737	26.5434	2.17189	12.2213	2.39202e-34	5.76652e-33
Sh3bp4	220.529	25.4213	2.3826	10.6696	1.41271e-26	2.58755e-25
Pfkp	220.25	10.007	1.98171	5.04966	4.42588e-07	2.93264e-06
Atp8b1	219.792	7.67811	1.95773	3.92195	8.78364e-05	0.000483838
Wasf1	213.543	27.144	1.50749	18.0061	1.74635e-72	1.47566e-70
Mdga1	208.896	22.7914	1.7275	13.1932	9.59657e-40	2.76966e-38
Nrp2	207.793	39.6083	1.61569	24.5148	1.02835e-132	7.66261e-130
Mapk10	207.205	14.4131	1.48467	9.70794	2.78922e-22	4.26129e-21
Gm2694	206.674	27.5184	1.65444	16.633	4.0181e-62	2.45779e-60
Pknox2	205.619	8.80829	2.08774	4.21905	2.45331e-05	0.000142286
Vwa3a	205.612	12.1077	1.24017	9.76293	1.62389e-22	2.51136e-21
Bmp3	202.11	27.6255	1.99384	13.8554	1.17941e-43	3.87458e-42
Gm6831	201.876	26.5466	3.45193	7.69037	1.46716e-14	1.58127e-13
Plekho1	200.539	27.0285	1.24574	21.6967	2.20322e-104	6.01955e-102
Art5	193.163	8.75273	1.95863	4.4688	7.86586e-06	4.77221e-05
Gm6277	192.216	28.2952	2.28108	12.4043	2.4765e-35	6.20753e-34
Fam217b	191.808	28.2093	1.91761	14.7107	5.50622e-49	2.20693e-47
Dnm3os	191.343	12.0052	1.85867	6.45901	1.0539e-10	9.16526e-10
Epha4	189.783	27.7287	2.81519	9.84967	6.87698e-23	1.08087e-21
Gabrb3	188.995	28.2732	2.37851	11.8869	1.38413e-32	3.15577e-31
Hint1	188.789	26.58	1.49436	17.7869	8.92282e-71	7.24118e-69
Rgl1	188.055	13.043	1.9381	6.72976	1.6994e-11	1.5434e-10
Kcnma1	185.395	11.9595	1.3807	8.66187	4.64089e-18	5.95757e-17
Crmp1	185.007	29.2837	2.69929	10.8487	2.02346e-27	3.83032e-26
Myo3a	184.551	26.3554	1.76058	14.9697	1.15792e-50	4.89223e-49
A930009A15Rik	182.765	11.3366	1.14819	9.87347	5.42555e-23	8.57677e-22
Hs3st3b1	182.081	27.9498	1.77366	15.7582	6.03008e-56	3.02297e-54
E230025N22Rik	182.038	28.1987	2.26403	12.4551	1.31205e-35	3.3192e-34
B230217C12Rik	181.687	11.9306	1.94195	6.1436	8.06733e-10	6.56968e-09
Syt7	181.502	25.1799	1.59188	15.8178	2.34684e-56	1.1985e-54
St8sia3	181.259	26.7329	1.19429	22.384	5.63182e-111	1.92338e-108
Tunar	180.154	28.1749	2.23071	12.6304	1.43481e-36	3.72165e-35
Ucp3	180.104	18.6886	1.65736	11.2761	1.72164e-29	3.48429e-28
Odf3b	179.978	28.2565	1.7269	16.3626	3.5392e-60	2.02154e-58
Tnfaip3	179.556	25.6514	2.72378	9.41757	4.61631e-21	6.691e-20
Cnot11	179.299	4.37284	1.1324	3.86158	0.000112657	0.000610584
Tle2	179.284	25.1419	1.50821	16.67	2.16754e-62	1.33581e-60
Hecw1	179.011	6.7589	1.59517	4.23711	2.26411e-05	0.000131849
Cox8b	177.326	21.3329	2.54341	8.38751	4.96558e-17	6.06564e-16
Mgll	175.976	23.126	1.83272	12.6184	1.67146e-36	4.32862e-35
Lrrc52	175.849	27.8934	2.75404	10.1282	4.14334e-24	6.84695e-23
Cyth1	174.681	10.0099	1.45277	6.89023	5.57007e-12	5.22668e-11
Irx2	174.136	11.8667	1.63021	7.27926	3.3565e-13	3.37565e-12
Enc1	174.094	21.207	1.80617	11.7414	7.81762e-32	1.72948e-30
Rara	173.987	6.51436	1.19364	5.45754	4.82786e-08	3.46057e-07
Chdh	173.782	10.5987	1.7916	5.91578	3.30309e-09	2.55895e-08
Bsn	173.253	20.8623	2.43188	8.57866	9.59839e-18	1.21316e-16
Popdc3	172.6	12.5824	1.85136	6.79628	1.07354e-11	9.92029e-11
Taf15	171.816	5.5168	1.22812	4.49206	7.05373e-06	4.30018e-05
Inka1	170.9	22.8989	1.95103	11.7368	8.25188e-32	1.81819e-30
Asic1	170.758	13.3536	1.83618	7.2725	3.52891e-13	3.54252e-12
Ssbp2	170.482	26.4226	1.9136	13.8078	2.2861e-43	7.40633e-42
Pdzph1	170.417	37.1425	2.6689	13.9168	5.01121e-44	1.65957e-42
Fads6	170.077	26.4544	1.55959	16.9624	1.55952e-64	1.02671e-62
Oacyl	170.031	6.11494	1.62931	3.75308	0.000174677	0.000924896
Ttbk2	169.771	5.8919	1.563	3.76961	0.000163506	0.000868833
Rbfox2	169.09	4.96012	1.31003	3.78627	0.000152923	0.000815505
Gan	168.28	8.05951	1.51348	5.32517	1.00861e-07	7.04481e-07
Unc5b	167.523	25.017	1.74285	14.354	1.00516e-46	3.66983e-45
Rims3	167.006	28.036	1.97479	14.1969	9.57042e-46	3.33804e-44
Gm4131	166.336	11.0065	1.39888	7.86809	3.60107e-15	4.00763e-14
Amph	166.141	27.4874	1.80123	15.2603	1.40519e-52	6.48883e-51
Gpc1	164.759	16.8105	1.60176	10.495	9.10857e-26	1.62655e-24
Pcdh7	164.525	27.2731	2.08581	13.0756	4.54228e-39	1.27503e-37
Smim1	164.461	25.9706	2.30566	11.2639	1.97891e-29	4.00003e-28
Clrn2	163.396	11.7774	2.17078	5.4254	5.78246e-08	4.12857e-07
Grm2	162.536	20.1965	2.8502	7.08601	1.38039e-12	1.34104e-11
Adarb1	160.428	27.9215	1.99159	14.0197	1.18193e-44	4.01978e-43
Shisal1	160.303	26.0201	1.94457	13.3809	7.81707e-41	2.32991e-39
Tmprss11b	158.42	17.1039	3.36311	5.08573	3.66218e-07	2.44837e-06
Tspan2	158.4	26.3756	1.92745	13.6842	1.26196e-42	3.9937e-41
Meikin	157.905	11.7276	1.45246	8.07432	6.78529e-16	7.86642e-15
Capn15	157.532	9.64857	1.3188	7.31619	2.55112e-13	2.58151e-12
Sos1	156.464	5.13114	1.31603	3.89896	9.66071e-05	0.000529659
Slc4a8	156.219	25.2213	1.69638	14.8677	5.34217e-50	2.21147e-48
A930033H14Rik	154.997	11.7013	1.54122	7.59222	3.14467e-14	3.33877e-13
Tmem25	153.949	24.7555	2.177	11.3714	5.80706e-30	1.19292e-28
Brsk2	153.663	24.8963	2.0393	12.2083	2.80813e-34	6.73006e-33
Lingo3	152.43	26.6963	1.65222	16.1578	1.00088e-58	5.54304e-57
Slco5a1	152.262	24.4905	2.48554	9.85316	6.64201e-23	1.04494e-21
Pcbp3	151.925	25.9286	1.8325	14.1493	1.88674e-45	6.55284e-44
Ankrd13b	151.586	26.5207	1.90091	13.9516	3.07662e-44	1.03139e-42
Rragb	151.207	25.9098	1.9407	13.3507	1.17317e-40	3.45896e-39
St6galnac6	150.355	27.791	2.34746	11.8388	2.46035e-32	5.54781e-31
Art1	149.838	28.1061	1.66757	16.8545	9.71903e-64	6.2726e-62
Cdh13	149.323	25.8289	2.36415	10.9252	8.73233e-28	1.67426e-26
Abcc8	148.219	9.18701	1.85765	4.94551	7.59457e-07	4.95021e-06
Ppfia3	148.218	27.8534	2.01386	13.8308	1.66067e-43	5.42299e-42
Erc2	144.863	27.7124	2.01305	13.7664	4.05828e-43	1.30446e-41
Insc	144.364	27.2295	2.61584	10.4095	2.24395e-25	3.93423e-24
Dach1	144.206	25.4565	1.48822	17.1053	1.35441e-65	9.25118e-64
Hdac9	143.787	7.26117	1.48948	4.87497	1.08826e-06	7.0263e-06
Gm45104	143.656	18.1751	2.01997	8.99772	2.30458e-19	3.11965e-18
Tinagl1	142.195	20.0181	2.65229	7.54748	4.43754e-14	4.66611e-13
Irf1	141.508	14.3204	2.29115	6.25031	4.09643e-10	3.3967e-09
Klf2	140.573	14.7977	2.48938	5.94432	2.77615e-09	2.163e-08
Dtx1	140.25	14.499	1.63588	8.8631	7.78229e-19	1.03635e-17
Mcph1	139.309	23.634	1.68017	14.0664	6.10869e-45	2.0906e-43
Efcc1	138.831	26.6871	2.02551	13.1755	1.21417e-39	3.47969e-38
Cacng5	137.365	27.1366	2.36873	11.4562	2.18977e-30	4.58453e-29
Lmod1	137.304	6.34355	1.34699	4.70943	2.48415e-06	1.56445e-05
Gm30094	137.022	22.4442	2.17383	10.3247	5.44756e-25	9.34119e-24
1700025G04Rik	136.96	11.5221	1.9559	5.89095	3.83971e-09	2.9593e-08
Uty	136.948	27.1555	2.89282	9.38718	6.16268e-21	8.90871e-20
Gpr152	136.695	6.82603	1.81361	3.76377	0.000167372	0.000888183
Gm1043	136.03	37.4942	1.54222	24.3118	1.46924e-130	8.92046e-128
Ankrd50	135.952	6.05452	1.52769	3.96318	7.39565e-05	0.000410416
Wscd2	135.761	11.8955	2.056	5.78577	7.21811e-09	5.44029e-08
Pcolce2	135.153	8.44118	2.03377	4.1505	3.3175e-05	0.000190486
Hemk1	135.016	26.3624	2.34795	11.2278	2.9778e-29	5.93137e-28
Gdap1l1	134.959	26.0505	2.23155	11.6737	1.73616e-31	3.78973e-30
Adgrv1	133.959	12.9854	2.43768	5.32697	9.98661e-08	6.98424e-07
Dscaml1	133.873	27.3858	2.51827	10.8748	1.5197e-27	2.89343e-26
Palm3	133.79	12.8689	3.05676	4.20999	2.55384e-05	0.000147866
Rab36	133.099	17.8672	1.54564	11.5597	6.59318e-31	1.40549e-29
Rnf32	131.579	8.93298	2.36929	3.77032	0.000163041	0.000866645
Arhgap24	130.888	24.4503	2.27543	10.7453	6.23365e-27	1.15598e-25
Asphd2	130.608	26.7351	2.44736	10.924	8.84767e-28	1.69439e-26
AA986860	130.277	17.8157	2.35016	7.58062	3.43903e-14	3.63716e-13
Lpcat2	129.905	23.6315	2.03074	11.6369	2.67575e-31	5.80975e-30
Bach1	128.908	8.75965	1.80763	4.84594	1.26013e-06	8.06925e-06
Syt14	127.149	26.8425	1.95232	13.7491	5.15953e-43	1.64553e-41
Tnfaip8l1	127.134	10.1378	1.90446	5.32319	1.01961e-07	7.11556e-07
Gm44164	126.543	26.1934	2.01321	13.0108	1.06293e-38	2.9285e-37
Cel	126.14	27.432	2.04949	13.3848	7.42147e-41	2.21603e-39
Slx4	125.376	18.1665	1.89289	9.59722	8.21331e-22	1.22624e-20
Dpysl5	125.063	25.304	1.99759	12.6673	8.97919e-37	2.34388e-35
Gm9195	124.911	28.0354	1.9735	14.2059	8.41912e-46	2.94903e-44
Scn8a	124.54	28.1969	1.8788	15.0079	6.51423e-51	2.79549e-49
Hsd11b1	123.308	27.9386	3.69584	7.55948	4.04681e-14	4.26072e-13
Sgip1	123.138	7.10018	1.75567	4.04414	5.25152e-05	0.000295633
Rnf208	120.629	20.5081	1.43669	14.2746	3.15122e-46	1.12056e-44
Plk1	120.45	27.4765	3.43232	8.00523	1.19245e-15	1.36412e-14
Ttc28	120.28	26.2184	1.79399	14.6146	2.26785e-48	8.85164e-47
Cmip	119.357	9.19555	1.66332	5.52844	3.23097e-08	2.34775e-07
Hrob	118.992	22.3757	2.33723	9.57361	1.03233e-21	1.53566e-20
Aff3	118.675	27.1473	3.39772	7.98987	1.35084e-15	1.5378e-14
2510009E07Rik	118.317	10.3613	1.47699	7.01513	2.29738e-12	2.20368e-11
Rps6kl1	118.163	9.03117	2.09617	4.30841	1.64433e-05	9.69276e-05
Sec14l5	117.679	38.5175	3.09452	12.447	1.45181e-35	3.66146e-34
Naaa	117.645	27.3714	2.21023	12.384	3.19043e-35	7.93638e-34
Gm37805	115.68	11.2791	1.54816	7.28549	3.20499e-13	3.22723e-12
Cacnb2	115.563	26.5899	1.84782	14.3899	5.99138e-47	2.21708e-45
Ube2ql1	115.473	12.4782	2.11517	5.8994	3.64819e-09	2.81434e-08
Spx	114.726	16.2002	2.51293	6.44674	1.14282e-10	9.89134e-10
Fads2	114.546	26.9715	2.6321	10.2471	1.21923e-24	2.05838e-23
Slc16a7	113.855	27.2886	2.1855	12.4862	8.87864e-36	2.26005e-34
Ripor3	113.736	15.3805	2.13272	7.21168	5.52657e-13	5.4974e-12
Slc25a13	113.702	6.3674	1.59851	3.98332	6.79579e-05	0.000378537
Nt5dc3	113.227	6.48509	1.30039	4.98704	6.13114e-07	4.01549e-06
Myof	113.129	17.4265	2.65994	6.55146	5.69763e-11	5.02969e-10
Tshz2	112.512	14.4612	2.57068	5.62545	1.85029e-08	1.36507e-07
Gm28439	112.379	3.34311	0.554417	6.02995	1.64007e-09	1.30008e-08
Maneal	112.218	26.8822	1.86388	14.4227	3.72506e-47	1.38571e-45
Syt2	112.099	21.8671	2.22245	9.83919	7.63243e-23	1.19845e-21
Unc79	111.845	27.5619	2.09487	13.1568	1.55453e-39	4.43189e-38
Phf21b	111.639	25.6492	1.57493	16.2859	1.24218e-59	6.99761e-58
Akap1	110.355	27.1	2.3945	11.3176	1.07374e-29	2.18928e-28
Gm5111	109.013	11.1936	0.944779	11.8479	2.20681e-32	4.98296e-31
Magee1	107.872	26.8022	1.9487	13.7539	4.82488e-43	1.5418e-41
Cabp4	107.572	7.00947	1.81203	3.8683	0.000109598	0.000596098
Pcsk6	107.484	27.0251	2.39521	11.283	1.59261e-29	3.22716e-28
Gm13889	107.203	23.915	2.79988	8.54146	1.32537e-17	1.66106e-16
Nme9	106.818	20.5522	2.04093	10.07	7.49657e-24	1.22891e-22
Btn2a2	106.066	41.4913	3.38476	12.2583	1.51724e-34	3.6957e-33
Mvb12b	105.097	25.6539	1.52677	16.8027	2.33093e-63	1.47532e-61
Nectin1	105.031	21.6231	1.46145	14.7956	1.56308e-49	6.3899e-48
Rad51c	104.143	9.25071	2.24519	4.12024	3.78484e-05	0.000216034
Tafa3	103.802	19.5847	2.04295	9.58648	9.11391e-22	1.35699e-20
Gm11655	103.675	26.7688	1.6193	16.5311	2.19095e-61	1.29195e-59
Spag6l	102.291	24.4871	2.40494	10.182	2.38595e-24	3.98705e-23
Slain1	101.999	14.5291	1.73066	8.39511	4.65459e-17	5.69848e-16
Wdr78	101.673	8.24179	1.93995	4.24844	2.15263e-05	0.00012558
Gm18760	101.598	11.0754	2.14308	5.16795	2.36673e-07	1.60388e-06
Tab3	101.002	8.78397	1.7779	4.94063	7.787e-07	5.0716e-06
Lpcat4	100.956	15.6304	2.44189	6.40097	1.5439e-10	1.32787e-09
Unc80	100.542	11.7281	2.02953	5.77873	7.5265e-09	5.66231e-08
Aqp5	100.021	26.7459	2.16335	12.3632	4.13459e-35	1.02539e-33
St8sia5	99.4741	27.1914	2.99583	9.07644	1.12188e-19	1.53771e-18
Cdc7	99.1869	6.1907	1.65254	3.74618	0.00017955	0.000948555
Mael	98.1506	37.4826	3.1858	11.7655	5.87494e-32	1.30676e-30
Gm44677	98.0041	40.1704	3.29599	12.1877	3.61626e-34	8.64159e-33
Cdh2	97.9429	14.4908	1.87262	7.73824	1.00805e-14	1.09147e-13
Slc7a4	97.5662	24.2709	2.38067	10.195	2.08724e-24	3.49859e-23
Lrrc8c	97.2949	27.2676	2.0444	13.3377	1.39658e-40	4.11026e-39
Pld5	97.2622	25.6275	2.406	10.6515	1.71556e-26	3.13175e-25
Gm43258	97.1704	10.9951	2.08523	5.27284	1.34325e-07	9.2911e-07
Fbxl22	96.4289	26.8081	1.79243	14.9563	1.41671e-50	5.95492e-49
Brd3os	96.183	22.0872	2.17906	10.1361	3.82003e-24	6.33823e-23
Ssh2	95.6932	26.3231	1.82102	14.4551	2.32649e-47	8.74728e-46
Igsf3	95.248	27.276	2.29009	11.9104	1.04415e-32	2.39062e-31
Fam155a	95.0307	10.992	2.08458	5.27299	1.3422e-07	9.28778e-07
Phtf1os	94.41	25.4333	1.62338	15.6669	2.5482e-55	1.25068e-53
Meig1	94.0032	22.7896	1.89781	12.0084	3.21166e-33	7.4679e-32
Orai2	93.7927	25.8949	1.79327	14.4401	2.8962e-47	1.08396e-45
4732496C06Rik	93.1948	24.6456	2.25909	10.9095	1.03816e-27	1.9812e-26
Fbxo31	91.0869	26.1339	1.86933	13.9804	2.05357e-44	6.92678e-43
Slc36a1	90.9996	7.15687	1.81178	3.95019	7.80883e-05	0.000432029
Sh2b2	90.7927	25.3179	1.90226	13.3094	2.04221e-40	5.9782e-39
Prickle3	90.6186	26.6155	2.51745	10.5724	4.00054e-26	7.2385e-25
Crxos	89.813	25.2415	3.01737	8.36541	5.99074e-17	7.29615e-16
Ptgfrn	89.5197	26.9987	2.44947	11.0223	2.98443e-28	5.80353e-27
Elovl4	88.94	23.7964	2.2144	10.7462	6.17516e-27	1.14643e-25
Acvr1	88.9219	19.7672	1.85504	10.6559	1.63586e-26	2.98959e-25
Vkorc1l1	88.6726	23.8911	1.76691	13.5214	1.16946e-41	3.55019e-40
Mfsd4a	87.9281	10.6123	1.66977	6.35552	2.07722e-10	1.76893e-09
Fbxw10	87.8226	27.1595	2.66013	10.2098	1.79169e-24	3.00626e-23
Lrrn3	87.8162	28.2733	3.84009	7.36267	1.80262e-13	1.84689e-12
Cap2	86.7441	42.647	2.16152	19.7301	1.18995e-86	1.54816e-84
Abhd14a	86.7181	25.7132	2.17223	11.8372	2.50604e-32	5.64306e-31
Gfod1	86.6046	9.76562	1.78165	5.48122	4.22412e-08	3.0478e-07
Slc43a2	86.5678	24.7267	1.85834	13.3058	2.14245e-40	6.26046e-39
Lrguk	86.2163	25.5034	2.12402	12.0071	3.25998e-33	7.56953e-32
Mturn	86.204	26.4215	2.84816	9.27669	1.74821e-20	2.48555e-19
Als2cl	86.0493	25.1435	1.95309	12.8737	6.33317e-38	1.7132e-36
Il17ra	86.0104	9.88474	2.34685	4.21191	2.53216e-05	0.000146739
Nphp4	85.983	24.2995	1.96648	12.3569	4.47244e-35	1.1075e-33
Samd14	85.6311	24.1994	2.50431	9.6631	4.32563e-22	6.54756e-21
Syp	85.5946	7.49532	1.42482	5.26054	1.43629e-07	9.93048e-07
Zfp11	85.4252	25.477	2.40707	10.5842	3.52654e-26	6.38791e-25
Rtn4rl2	85.1189	23.7772	2.75918	8.61749	6.84374e-18	8.69012e-17
Plaat1	85.1189	23.9618	2.48161	9.65573	4.64852e-22	7.02333e-21
Syngr1	85.0646	26.0823	2.10436	12.3944	2.80242e-35	7.00306e-34
Fhod3	84.9688	24.0803	1.92432	12.5137	6.28554e-36	1.60998e-34
Nudc-ps1	84.4741	7.38977	1.2225	6.0448	1.49599e-09	1.18932e-08
Slc1a4	84.1486	25.1469	2.65157	9.48379	2.45213e-21	3.58589e-20
Dkk3	84.0736	44.6144	3.05686	14.5948	3.02915e-48	1.17392e-46
Me3	84.0101	10.7363	1.99482	5.38212	7.36152e-08	5.20835e-07
4933424M12Rik	83.9976	35.1946	3.3867	10.392	2.69628e-25	4.70214e-24
2610307P16Rik	83.835	20.3101	1.94616	10.436	1.69817e-25	2.99013e-24
Sdr9c7	83.1371	31.6407	3.39763	9.31257	1.24779e-20	1.78335e-19
Plcxd2	83.0365	34.3301	2.5668	13.3747	8.50376e-41	2.51175e-39
Slc9a1	82.7932	8.39032	1.85641	4.51964	6.1946e-06	3.80045e-05
Gm10432	82.4019	25.3816	1.72659	14.7004	6.40911e-49	2.55947e-47
Ftx	81.8753	9.38489	1.99255	4.70998	2.47735e-06	1.56077e-05
Racgap1	81.7806	22.8127	2.56462	8.89514	5.83459e-19	7.79515e-18
Lrrc73	81.4343	24.9022	1.22589	20.3136	9.7576e-92	1.50902e-89
Fam43a	80.7905	24.1181	1.99916	12.0641	1.6341e-33	3.8378e-32
Gm37479	80.7476	21.6364	2.17074	9.96731	2.11894e-23	3.39216e-22
Iqgap2	80.2255	25.6722	2.65534	9.66815	4.11739e-22	6.25545e-21
Gpr19	79.9611	24.8155	4.32585	5.73656	9.66179e-09	7.22233e-08
Ltbp1	78.3581	27.6327	2.45657	11.2485	2.35587e-29	4.72701e-28
Armh4	76.9314	32.7602	2.95548	11.0846	1.49092e-28	2.92002e-27
Ehd4	76.8839	26.31	1.91275	13.7551	4.749e-43	1.52052e-41
F8	76.7089	26.618	2.8074	9.48139	2.50927e-21	3.66618e-20
Ppp1r32	76.333	26.8873	2.78729	9.64642	5.09039e-22	7.65567e-21
Gm14207	75.8362	26.6165	3.0785	8.64593	5.33686e-18	6.80834e-17
Ccdc9b	75.1966	25.1762	2.70931	9.29249	1.50727e-20	2.14858e-19
Ccdc40	74.6865	14.5882	2.0832	7.00276	2.50962e-12	2.40165e-11
Cabyr	74.556	26.5203	2.33023	11.381	5.20131e-30	1.07387e-28
Gm35147	74.2241	30.08	3.78799	7.94088	2.00744e-15	2.26171e-14
Lrrc3c	74.1336	27.9411	2.32556	12.0148	2.97115e-33	6.91848e-32
Dll4	74.0725	22.4323	2.09325	10.7165	8.51742e-27	1.57237e-25
Rtl6	74.0452	14.4561	1.90736	7.57913	3.47877e-14	3.67682e-13
Filip1l	73.5693	23.2963	3.26708	7.13061	9.99234e-13	9.7677e-12
Hdgfl3	73.372	22.9839	2.02134	11.3706	5.8568e-30	1.20163e-28
Stx2	72.2614	24.9334	2.48562	10.0311	1.11314e-23	1.80492e-22
Cers1	71.9788	26.5305	2.57511	10.3027	6.85381e-25	1.16793e-23
Vinac1	71.8893	26.8387	2.2445	11.9575	5.92888e-33	1.36698e-31
Fign	71.4825	32.6113	2.36059	13.8149	2.07306e-43	6.72945e-42
Ccdc149	71.2177	20.3478	2.56113	7.94485	1.94427e-15	2.19507e-14
Mindy4b-ps	71.124	25.2243	3.41058	7.39589	1.40469e-13	1.44461e-12
Mpped1	70.9865	29.4626	2.40034	12.2743	1.24403e-34	3.03924e-33
Bub1b	70.3028	26.6991	2.76206	9.66639	4.18911e-22	6.35852e-21
Gm15169	69.2324	11.8492	2.19026	5.40996	6.30378e-08	4.4871e-07
Kdm5d	69.212	25.3712	3.48559	7.27886	3.36644e-13	3.38357e-12
Gm34220	68.8307	5.83907	1.21157	4.81944	1.43959e-06	9.1897e-06
Scx	68.494	24.3797	2.98499	8.16745	3.14971e-16	3.71462e-15
Clip3	68.1406	26.5676	2.7108	9.80066	1.11849e-22	1.74125e-21
Gm37925	67.8906	25.7081	1.98253	12.9673	1.87445e-38	5.13845e-37
Man1a	67.746	25.222	2.15664	11.695	1.3514e-31	2.95775e-30
A430035B10Rik	67.7454	11.4772	2.59361	4.42519	9.63593e-06	5.80529e-05
Hey2	67.4288	14.7056	2.10727	6.97853	2.98274e-12	2.83455e-11
Ttyh2	67.3157	22.8261	2.14423	10.6454	1.8327e-26	3.34188e-25
Mks1	67.0172	23.753	2.26389	10.4921	9.38842e-26	1.67287e-24
Ksr2	66.9836	10.6299	1.49402	7.11495	1.1195e-12	1.09108e-11
Zfp629	66.8486	26.7489	3.3598	7.96144	1.7005e-15	1.92383e-14
Qsox1	66.7023	24.1313	1.67963	14.3671	8.32982e-47	3.05483e-45
Brpf3	66.5445	9.93205	1.98832	4.9952	5.87761e-07	3.85407e-06
Gm44509	66.2123	37.6816	2.74647	13.72	7.70154e-43	2.44673e-41
Mroh7	65.7853	26.8046	2.96991	9.0254	1.79045e-19	2.42971e-18
Dok7	65.2827	26.4762	3.37389	7.84739	4.24775e-15	4.70178e-14
Ssbp4	65.191	25.1618	1.69851	14.814	1.1893e-49	4.87404e-48
Btc	64.653	26.05	2.14216	12.1606	5.03677e-34	1.19663e-32
Stx1a	64.2726	20.6753	2.20827	9.36267	7.77488e-21	1.11508e-19
Ppp1r14c	64.2679	15.4212	3.33031	4.63056	3.64676e-06	2.27479e-05
Marchf3	63.6019	23.9761	2.37929	10.077	6.9834e-24	1.14708e-22
Erbb2	63.2834	15.3954	2.7091	5.68285	1.32467e-08	9.86164e-08
Fam13a	62.9676	26.8585	2.95481	9.08976	9.92597e-20	1.36164e-18
Ogdhl	62.9404	25.7166	2.01248	12.7785	2.16113e-37	5.72333e-36
2310016D03Rik	62.8557	10.3966	1.91075	5.4411	5.29534e-08	3.78737e-07
Gm44829	62.6128	11.3034	1.92696	5.8659	4.46713e-09	3.42355e-08
Rnf227	62.1013	17.5291	2.71236	6.46268	1.02863e-10	8.95027e-10
Nova1	61.9802	24.1291	2.47386	9.75362	1.78012e-22	2.74262e-21
Skor1	61.778	21.532	2.74018	7.85786	3.90737e-15	4.33967e-14
Zfp827	61.7507	26.589	2.02377	13.1384	1.98502e-39	5.64939e-38
Negr1	61.4638	26.1704	2.58049	10.1416	3.60996e-24	6.00184e-23
Gm37941	61.3158	10.3634	2.04067	5.07844	3.80542e-07	2.53689e-06
Mars2	60.9903	25.631	2.22132	11.5387	8.42356e-31	1.78407e-29
Gm31698	60.9399	34.8	3.69203	9.42571	4.27199e-21	6.19741e-20
Loxl1	60.8892	23.9076	2.3124	10.3389	4.70066e-25	8.09431e-24
Gm37524	60.7803	9.40337	2.47178	3.80428	0.000142215	0.000761373
Myo5a	60.4921	25.1498	2.38185	10.5589	4.619e-26	8.3208e-25
Rnf165	60.4738	23.3396	2.6464	8.81939	1.15087e-18	1.52392e-17
Gm18072	60.4483	33.8774	2.37858	14.2427	4.97808e-46	1.75496e-44
Atp2c2	60.2059	21.7953	1.68258	12.9535	2.24506e-38	6.14412e-37
Sh3rf3	60.0364	43.1038	3.80495	11.3284	9.49703e-30	1.94121e-28
Ano3	59.8222	26.0419	2.97675	8.74845	2.16296e-18	2.83206e-17
Gm49937	59.7136	46.9666	3.76983	12.4585	1.25663e-35	3.18392e-34
Ncam1	59.7022	25.0436	2.70792	9.24829	2.28104e-20	3.21799e-19
Map3k14	59.5347	24.6014	2.44257	10.072	7.35014e-24	1.20612e-22
Casp3	59.294	23.4029	2.59161	9.03024	1.71297e-19	2.32649e-18
Gm45495	58.414	25.4103	1.74247	14.583	3.60532e-48	1.39392e-46
Arnt2	58.1873	22.8134	2.26648	10.0656	7.84281e-24	1.28439e-22
Fn3k	57.6533	27.6108	2.42828	11.3705	5.86505e-30	1.20182e-28
Myo19	57.0231	24.1828	2.31759	10.4344	1.7266e-25	3.03693e-24
Adam23	56.8974	26.949	1.707	15.7873	3.80362e-56	1.93042e-54
Tcea1-ps1	56.8711	4.86855	1.11543	4.36474	1.27275e-05	7.57598e-05
Taf1c	56.7482	25.5179	3.08257	8.27813	1.25121e-16	1.49716e-15
Gm45130	56.2341	29.6063	3.70766	7.98517	1.40332e-15	1.59312e-14
Suv39h2	55.68	23.9837	2.73783	8.76013	1.95021e-18	2.56373e-17
Frmd3	55.434	25.2646	3.93984	6.41259	1.43064e-10	1.23175e-09
Gm44210	55.3883	24.8173	2.00845	12.3564	4.49646e-35	1.11177e-33
Tpcn2	55.2453	23.4287	3.83357	6.11144	9.87333e-10	7.96131e-09
Cmya5	55.2201	34.8225	3.65223	9.53458	1.50492e-21	2.23259e-20
Whrn	55.0605	26.0388	2.51428	10.3564	3.9157e-25	6.77825e-24
Ephb3	54.9189	25.3886	2.93229	8.65831	4.78794e-18	6.14153e-17
Zfp503	54.2107	23.1399	2.22071	10.42	2.00896e-25	3.52601e-24
Gucy2c	54.0903	22.3684	3.00856	7.43492	1.04634e-13	1.08287e-12
Gm34583	53.6684	44.8066	2.34152	19.1357	1.27282e-81	1.34615e-79
Gm13986	53.2095	19.61	2.88369	6.80032	1.04389e-11	9.66265e-11
Slc9a3r2	53.0675	23.5426	2.85807	8.23723	1.7624e-16	2.09811e-15
Sec16b	52.8293	26.1123	3.15214	8.28397	1.19136e-16	1.42659e-15
Ccdc65	52.7752	23.7718	2.46005	9.66313	4.32448e-22	6.54756e-21
Tshz3	52.3608	25.5766	2.11061	12.1181	8.46862e-34	2.00038e-32
Gm49066	52.1173	19.1716	2.54248	7.54052	4.68084e-14	4.91878e-13
Disc1	52.068	30.3312	2.35603	12.8739	6.31405e-38	1.71085e-36
Srrm3	51.8878	9.98616	1.84329	5.41757	6.04129e-08	4.30586e-07
Chek1	51.842	25.1736	2.45097	10.2709	9.53085e-25	1.61571e-23
Dnah8	51.4465	32.9519	2.66397	12.3695	3.8223e-35	9.49379e-34
Mmp2	51.288	25.1488	3.91182	6.42894	1.285e-10	1.10986e-09
Ppargc1b	50.7405	25.8125	3.23398	7.98164	1.44401e-15	1.63705e-14
Gm43256	50.6682	37.2961	3.08576	12.0865	1.24447e-33	2.93534e-32
Plppr5	49.4907	36.4799	4.3817	8.3255	8.39709e-17	1.01514e-15
Fam124a	49.4831	25.8961	2.58541	10.0162	1.29337e-23	2.08889e-22
Hspb1	49.3247	22.2599	4.38282	5.07891	3.79612e-07	2.53173e-06
Cdcp2	48.9505	26.4752	2.29083	11.557	6.80462e-31	1.44868e-29
Carmil3	48.873	24.9389	2.24715	11.098	1.28319e-28	2.51619e-27
Rimbp2	48.7759	26.3104	2.5176	10.4506	1.45575e-25	2.57156e-24
Spef1	48.7416	23.3842	1.90837	12.2535	1.60931e-34	3.91416e-33
Khdrbs2	48.4181	15.7874	2.92866	5.39067	7.0195e-08	4.98141e-07
Dph2	47.8854	24.8001	2.90285	8.54337	1.30359e-17	1.63502e-16
Ddx25	47.6695	24.2616	2.96177	8.19159	2.57798e-16	3.04912e-15
Pcsk9	47.3029	25.9128	2.64488	9.79733	1.15597e-22	1.7979e-21
Lrmda	47.2731	25.6363	2.96582	8.64392	5.43177e-18	6.92403e-17
Kif18a	46.9869	22.8995	2.61807	8.74669	2.19701e-18	2.87435e-17
Bend3	46.6513	15.7687	1.69538	9.30101	1.39114e-20	1.98649e-19
Srcin1	46.3072	8.6847	1.63982	5.29612	1.18288e-07	8.21654e-07
Adcy8	46.1077	26.1937	2.85278	9.18181	4.23906e-20	5.89405e-19
Gm42448	46.0348	25.463	3.76764	6.75833	1.39589e-11	1.27695e-10
Trerf1	45.856	26.5861	2.94578	9.02515	1.7945e-19	2.43319e-18
Slc16a3	45.6526	22.3991	2.43574	9.19601	3.71487e-20	5.16959e-19
Gm24620	45.2416	26.3546	2.84975	9.24803	2.28659e-20	3.22305e-19
Ttc12	45.2	20.6506	2.57788	8.01069	1.14069e-15	1.30764e-14
1700066M21Rik	45.1023	24.7789	3.02639	8.18761	2.66471e-16	3.14944e-15
Jade3	45.0301	17.5788	3.3689	5.21797	1.80893e-07	1.23896e-06
Lhfpl4	44.9946	10.6913	2.13857	4.99926	5.75504e-07	3.78126e-06
Dnhd1	44.7746	9.94427	2.54436	3.90835	9.29274e-05	0.00051068
Lrrc75a	44.1491	23.6612	2.51519	9.40731	5.08996e-21	7.371e-20
2900027M19Rik	43.8339	42.8714	3.25825	13.1578	1.53499e-39	4.39145e-38
Gm44691	43.7874	27.431	3.00508	9.12821	6.96429e-20	9.60989e-19
Fam166c	43.4761	33.4609	3.72134	8.99163	2.43597e-19	3.29208e-18
Fam185a	43.4693	22.4911	2.79762	8.03938	9.02978e-16	1.04023e-14
Slc27a3	43.1648	24.1282	4.25201	5.67454	1.39061e-08	1.03478e-07
Sema4c	42.7051	25.9491	2.58543	10.0367	1.05132e-23	1.70806e-22
Stmn3	42.5768	25.6639	2.81251	9.12491	7.1798e-20	9.89062e-19
D430040D24Rik	42.4222	26.3736	3.17782	8.29926	1.04759e-16	1.25719e-15
Nfasc	42.3553	24.4089	2.34803	10.3955	2.59881e-25	4.54182e-24
Ttc30a1	41.737	20.3602	2.77627	7.33365	2.23969e-13	2.28045e-12
Sycp2	41.7355	35.8223	3.32401	10.7768	4.4294e-27	8.27006e-26
Ube2cbp	41.2172	24.5973	3.06186	8.03345	9.47684e-16	1.08944e-14
Abca6	41.1136	39.7161	2.51073	15.8185	2.31804e-56	1.18749e-54
Prph2	41.0464	26.9871	3.62204	7.45079	9.27858e-14	9.61465e-13
Cep170	40.8935	8.20514	2.08229	3.94044	8.13325e-05	0.000449371
B4galnt4	40.6725	26.4374	2.86115	9.24012	2.46218e-20	3.46162e-19
Tsku	40.1164	32.123	2.35587	13.6353	2.46834e-42	7.72204e-41
Calcrl	39.9168	25.241	3.18035	7.93654	2.07891e-15	2.33742e-14
Dus4l	39.7623	24.748	3.01749	8.20152	2.37362e-16	2.81147e-15
Dynlrb2	39.7372	25.9107	2.81023	9.22013	2.96749e-20	4.14715e-19
Ghsr	39.6263	17.0552	4.40949	3.86783	0.000109807	0.000596838
9030407P20Rik	39.5456	25.0839	4.19704	5.97657	2.27884e-09	1.78913e-08
Nat14	39.5119	26.3879	2.56241	10.2981	7.18769e-25	1.22355e-23
Impg1	38.7632	26.0215	3.95534	6.57883	4.74173e-11	4.19488e-10
Fgd1	38.6574	24.3619	1.79737	13.5542	7.48614e-42	2.28956e-40
Nrxn2	38.1383	8.2087	1.62228	5.05997	4.19319e-07	2.78634e-06
Pde4d	37.5759	6.70491	1.26105	5.31694	1.05529e-07	7.3583e-07
Hfm1	37.4491	30.992	4.38174	7.07299	1.51635e-12	1.46825e-11
Gm26953	37.3468	24.7247	2.82567	8.75003	2.13299e-18	2.79953e-17
Krt222	37.3261	27.6574	3.95682	6.98981	2.75266e-12	2.62503e-11
Cdh4	37.2908	21.6551	2.95821	7.32035	2.47319e-13	2.50575e-12
A430010J10Rik	37.1865	21.8526	2.83746	7.70146	1.34522e-14	1.45176e-13
Hrh3	37.0054	19.9835	2.63248	7.59112	3.17163e-14	3.36521e-13
A230051N06Rik	36.9219	22.4023	2.95273	7.58698	3.27443e-14	3.47204e-13
Bmp7	35.9078	24.6263	2.65431	9.27785	1.72928e-20	2.46078e-19
Nkain2	35.7237	25.2284	2.79094	9.03941	1.57523e-19	2.14119e-18
Gm37064	35.5723	20.7589	2.4936	8.32489	8.44096e-17	1.0197e-15
Ap5b1	35.5261	24.1919	3.36051	7.19888	6.07109e-13	6.01713e-12
Gm35585	35.4736	22.2284	2.63772	8.42711	3.54306e-17	4.38019e-16
6430571L13Rik	35.262	24.2859	2.76214	8.79242	1.46377e-18	1.93201e-17
Tmem178b	35.1606	24.0325	1.90717	12.6011	2.08267e-36	5.37658e-35
Gm16415	34.9046	27.5961	4.38173	6.29798	3.01548e-10	2.52724e-09
Gm15751	34.6051	18.0642	1.81735	9.93986	2.7923e-23	4.4441e-22
Dlgap3	34.2687	14.5982	2.2752	6.41623	1.39695e-10	1.204e-09
Rbm45	33.9021	7.90228	2.03074	3.89134	9.96941e-05	0.000545125
Soat1	33.9009	9.40186	2.26203	4.15638	3.23328e-05	0.000185846
Mrap2	33.8013	22.2742	3.14712	7.07765	1.46622e-12	1.4214e-11
Sprtn	33.7868	23.8758	2.95364	8.0835	6.2932e-16	7.31144e-15
Timp3	33.6816	24.9245	2.27553	10.9533	6.40977e-28	1.23328e-26
Gm12346	33.4432	2.97268	0.398795	7.45417	9.0438e-14	9.37729e-13
Flrt2	33.4088	23.1169	3.24089	7.13288	9.82921e-13	9.63122e-12
Cnih3	33.2442	25.6287	2.94279	8.70898	3.06616e-18	3.97026e-17
Afmid	33.1133	9.17249	2.2592	4.06006	4.90593e-05	0.000276843
Vgf	33.0031	14.535	2.51719	5.77428	7.72813e-09	5.80868e-08
Gm4864	32.9521	22.9919	1.78603	12.8732	6.36757e-38	1.71966e-36
Dynlt1a	32.8832	5.70741	1.10035	5.18689	2.13833e-07	1.45572e-06
Mms22l	32.8351	14.4948	3.29577	4.39801	1.09246e-05	6.54079e-05
A930017M01Rik	32.7508	23.8689	3.11417	7.66461	1.79375e-14	1.92315e-13
Samd1	32.5563	9.5236	2.0059	4.74779	2.05651e-06	1.30365e-05
Camk2n2	32.4872	10.6051	1.6737	6.33635	2.35277e-10	1.99529e-09
Hes5	32.4108	21.6525	2.37972	9.09875	9.13775e-20	1.25667e-18
Gm37060	32.288	25.3674	2.34742	10.8065	3.20704e-27	6.0221e-26
Ankrd45	32.018	21.7495	2.78879	7.79891	6.24421e-15	6.85608e-14
A530072M11Rik	31.9285	24.7999	3.81807	6.49539	8.28207e-11	7.25257e-10
Rhebl1	31.8146	15.7857	3.52701	4.47564	7.61818e-06	4.62879e-05
Dhrs13	31.6732	23.0814	2.842	8.12152	4.60382e-16	5.40232e-15
Ryr2	31.4809	9.35434	2.16841	4.31391	1.60393e-05	9.46481e-05
Gm6566	30.8603	9.72866	2.38996	4.07064	4.6884e-05	0.000265115
Zfp647	30.6749	23.327	3.27059	7.13237	9.86552e-13	9.66102e-12
Shisa4	30.4033	20.0841	2.6996	7.43967	1.0094e-13	1.0453e-12
Celf4	30.2109	16.8052	4.17082	4.02924	5.5958e-05	0.000314258
Mfsd3	30.1874	24.0641	4.38197	5.49161	3.98275e-08	2.87618e-07
Ppp2r2c	29.2089	32.1869	4.28866	7.50512	6.13713e-14	6.42029e-13
B230206I08Rik	28.9468	24.6639	3.23277	7.62932	2.35992e-14	2.52355e-13
Samd11	28.9416	25.8245	3.0753	8.3974	4.56489e-17	5.59284e-16
Rln3	28.8888	22.6914	4.07367	5.57027	2.54348e-08	1.86057e-07
Krt87	28.847	15.4227	2.99284	5.15319	2.56088e-07	1.73187e-06
Gm13599	28.7574	9.18775	2.12338	4.32695	1.5119e-05	8.93457e-05
Zc3h12b	28.7316	24.9671	2.49419	10.0101	1.37613e-23	2.22037e-22
BC001981	28.3503	34.5316	3.7687	9.16273	5.06008e-20	7.0059e-19
Sik1	28.3158	24.6477	1.72639	14.277	3.04405e-46	1.08481e-44
Gm6981	28.1167	34.0386	4.38176	7.76826	7.95702e-15	8.67284e-14
Efr3b	27.833	18.2865	2.8585	6.39723	1.58224e-10	1.35941e-09
Pomc	27.6399	24.1173	3.09902	7.78224	7.12539e-15	7.80271e-14
2900052L18Rik	27.5804	21.7714	2.56774	8.47881	2.27509e-17	2.82971e-16
Gm49594	27.3264	3.52819	0.921963	3.82682	0.000129807	0.000697681
Gm43728	27.2613	31.8272	3.1468	10.1141	4.78179e-24	7.89404e-23
1700056N10Rik	27.2078	23.9895	3.29654	7.27718	3.40871e-13	3.42396e-12
Mettl5os	26.8404	24.6006	3.50091	7.0269	2.11166e-12	2.02672e-11
Gm30373	26.6534	33.0569	2.85475	11.5796	5.22799e-31	1.12323e-29
Gm10558	26.5969	24.6942	2.88525	8.55878	1.14071e-17	1.43623e-16
Fam131a	26.5328	22.0876	2.63655	8.37745	5.40854e-17	6.59689e-16
Gm27239	26.4104	23.3634	1.58447	14.7452	3.30217e-49	1.33331e-47
Them7	26.0419	26.1923	3.3669	7.77933	7.29072e-15	7.9731e-14
Gpr62	25.9471	23.2668	2.48242	9.37261	7.07598e-21	1.0202e-19
Gm49215	25.8802	23.1721	2.66598	8.69178	3.56812e-18	4.60206e-17
Star	25.7366	23.5044	3.17257	7.40864	1.27605e-13	1.31811e-12
B4galt2	25.5116	29.7291	4.38177	6.78472	1.16309e-11	1.07176e-10
Ctnna2	25.0535	25.3583	3.69699	6.85918	6.92555e-12	6.45426e-11
Bambi	24.9577	14.6351	3.78646	3.86511	0.000111039	0.000602936
Lrg1	24.7905	21.3467	3.37734	6.32057	2.60607e-10	2.19534e-09
Fam161a	24.717	24.1287	2.05485	11.7423	7.73727e-32	1.71401e-30
Slc8a1	24.7004	23.6677	2.90059	8.1596	3.36138e-16	3.95571e-15
Evc2	24.3293	29.4206	4.38178	6.71431	1.8896e-11	1.71234e-10
Soga3	24.2213	17.5312	3.1444	5.57536	2.47013e-08	1.80933e-07
Tcap	23.8443	31.2084	4.38178	7.12231	1.06133e-12	1.03562e-11
Fgd2	23.5427	24.0111	2.59936	9.23731	2.52779e-20	3.54777e-19
Gm12338	23.3793	2.41701	0.599026	4.0349	5.46254e-05	0.000306985
Dhcr24	23.3686	24.4926	3.05708	8.01174	1.13095e-15	1.29739e-14
Gm12751	23.0486	5.18815	1.3316	3.89617	9.77267e-05	0.000535464
Frmd5	23.0408	8.95092	2.33873	3.82726	0.000129577	0.000696903
Gm6402	22.9806	10.0849	2.1665	4.65494	3.24078e-06	2.02772e-05
H3f3a-ps1	22.657	2.61224	0.673	3.88149	0.000103818	0.00056579
Myt1	22.609	33.0176	4.38179	7.53519	4.87617e-14	5.12076e-13
Acot6	22.5567	22.23	2.70102	8.23024	1.86842e-16	2.21949e-15
Ina	21.9943	23.6657	3.2333	7.31937	2.49142e-13	2.52266e-12
Dzip1l	21.6025	8.85702	2.17746	4.0676	4.74996e-05	0.000268504
1110006O24Rik	21.4866	22.6408	2.67299	8.47021	2.44948e-17	3.03969e-16
Gpr162	21.4608	23.3151	1.84179	12.6589	9.9852e-37	2.60234e-35
Dnah7b	21.3416	15.5664	2.40256	6.47909	9.22801e-11	8.06799e-10
Gm49322	20.7157	20.609	2.46458	8.36206	6.16304e-17	7.49487e-16
Rnf17	20.4609	23.6358	3.87677	6.09677	1.0823e-09	8.6886e-09
Emp3	20.4238	17.757	3.89653	4.55713	5.18573e-06	3.20549e-05
Adgra2	20.3946	14.6496	2.9971	4.88793	1.01904e-06	6.59236e-06
4930473A02Rik	20.3288	23.6303	4.0599	5.82042	5.87006e-09	4.45912e-08
AI480526	20.3009	24.3372	1.90691	12.7627	2.64955e-37	6.99422e-36
4930448D08Rik	20.2209	23.2732	3.44234	6.76086	1.37172e-11	1.25694e-10
Gm49703	19.9939	18.2258	3.9122	4.65872	3.18176e-06	1.99155e-05
Frs3	19.9157	22.3776	2.84453	7.86688	3.63589e-15	4.04363e-14
Spef2	19.8764	16.3042	2.37213	6.87323	6.27622e-12	5.8658e-11
Pcsk1	19.8679	14.6353	3.42661	4.27108	1.94531e-05	0.000113932
Mslnl	19.8421	23.9044	3.52811	6.7754	1.24063e-11	1.14065e-10
Slc19a2	19.8081	24.3217	2.5631	9.48921	2.32797e-21	3.4104e-20
Rtn4r	19.6011	24.3539	4.10154	5.93775	2.88953e-09	2.24706e-08
Cys1	19.4144	25.5803	2.63946	9.6915	3.27683e-22	4.99694e-21
Gm17108	19.4014	24.1108	2.97976	8.09153	5.89192e-16	6.85495e-15
Tnfrsf13c	19.3953	22.6755	4.38263	5.17395	2.29191e-07	1.55639e-06
Gm13868	19.1522	23.6611	2.83601	8.3431	7.23703e-17	8.77489e-16
Spata33	19.0424	24.5946	3.58499	6.86043	6.8652e-12	6.40166e-11
9230112E08Rik	19.0307	22.8367	3.1868	7.16604	7.71975e-13	7.60974e-12
St6galnac2	18.4891	14.907	3.4149	4.36528	1.2696e-05	7.5627e-05
Ghr	18.2171	24.1488	4.38187	5.51108	3.56647e-08	2.58581e-07
Dgki	17.8845	15.2837	3.0703	4.97794	6.42662e-07	4.20565e-06
Gm19427	17.6605	24.491	2.99926	8.16569	3.19602e-16	3.76653e-15
Zfp251	17.5393	21.6252	2.56955	8.41594	3.89768e-17	4.7933e-16
Wfdc1	17.0006	29.5812	4.38184	6.75086	1.46973e-11	1.34224e-10
Gm45453	16.9331	22.4243	2.74412	8.17177	3.03888e-16	3.58649e-15
Cox5b-ps	16.8512	2.48531	0.579977	4.28518	1.8259e-05	0.000107206
1700056E22Rik	16.6875	21.5452	3.56593	6.04194	1.5227e-09	1.20938e-08
Cers4	16.6038	23.6787	4.32813	5.47089	4.47776e-08	3.22074e-07
Gm31105	16.3193	22.6008	3.32779	6.79152	1.10962e-11	1.02421e-10
Dpp6	16.3102	19.8505	4.15599	4.77636	1.78496e-06	1.1337e-05
Dnase1l2	16.3074	23.821	3.40284	7.00032	2.5538e-12	2.44108e-11
Gm16152	16.1513	32.2216	4.38185	7.35343	1.9319e-13	1.97565e-12
Ighm	16.134	35.0291	4.38185	7.99413	1.30491e-15	1.48758e-14
Ccnb2-ps	16.1132	25.27	4.40949	5.73083	9.99386e-09	7.46035e-08
Pgap3	15.9395	20.9619	4.26827	4.9111	9.05687e-07	5.87764e-06
Nnat	15.858	15.7657	3.06519	5.14348	2.69694e-07	1.82163e-06
Gm10244	15.8283	23.2151	3.38515	6.85793	6.98677e-12	6.50762e-11
Serpinf1	15.7524	16.2828	3.61106	4.50914	6.50921e-06	3.98452e-05
Tmem28	15.6306	20.7628	2.90032	7.15879	8.13935e-13	8.01853e-12
4930466K18Rik	15.5851	30.4624	3.36903	9.04189	1.53984e-19	2.09656e-18
Pm20d2	15.1722	14.5534	2.72264	5.34531	9.02607e-08	6.33952e-07
St6galnac3	15.1134	31.4689	4.38186	7.18162	6.88906e-13	6.80316e-12
Gtf2h4	15.0855	23.5101	3.29648	7.13188	9.90037e-13	9.68935e-12
Gm5844	14.8812	2.05536	0.345232	5.95355	2.62383e-09	2.04919e-08
Slc6a14	14.6521	26.3029	4.40949	5.96507	2.44534e-09	1.91344e-08
Mir96	14.5472	8.15462	2.0606	3.9574	7.57709e-05	0.000420058
Gm31848	14.4206	35.2133	4.38187	8.03613	9.27196e-16	1.06663e-14
Zmat4	14.3087	16.0307	2.96746	5.40216	6.58446e-08	4.68079e-07
Myoz1	14.2966	31.0741	4.38188	7.09151	1.32659e-12	1.29061e-11
Cfap299	13.678	17.4878	3.41471	5.12132	3.03403e-07	2.04091e-06
Gprin1	13.2451	23.565	4.38225	5.37738	7.55789e-08	5.33577e-07
Rem1	13.2146	31.476	4.24967	7.40669	1.2949e-13	1.33673e-12
Nefl	13.2085	35.5966	3.92831	9.06155	1.28605e-19	1.75978e-18
9130019O22Rik	13.1792	21.1655	4.38324	4.82874	1.37403e-06	8.78488e-06
Padi1	13.0912	5.99147	1.53923	3.8925	9.92152e-05	0.000542688
Gm36033	13.0819	24.3049	4.38192	5.54664	2.91218e-08	2.12553e-07
Scn11a	12.9505	24.8835	4.28133	5.8121	6.16923e-09	4.67719e-08
Dusp27	12.8676	28.3801	4.3819	6.47666	9.3778e-11	8.17715e-10
Cdh15	12.8293	23.0064	4.38195	5.25026	1.51882e-07	1.04745e-06
Gm13269	12.7538	24.1854	3.66264	6.60325	4.02245e-11	3.58175e-10
Fezf2	12.7196	28.2502	4.38191	6.44702	1.1407e-10	9.87825e-10
E430021H15Rik	12.7042	22.0667	2.87672	7.67079	1.70938e-14	1.83509e-13
Gm24447	12.7012	4.81753	0.788979	6.10603	1.02137e-09	8.21155e-09
Gm42640	12.5337	24.5942	4.38193	5.61264	1.99259e-08	1.46609e-07
B230307C23Rik	12.387	15.45	2.29382	6.73547	1.63402e-11	1.48566e-10
Adamts17	12.3604	23.5681	3.62647	6.4989	8.0908e-11	7.08885e-10
Noxred1	12.3581	19.1228	3.43176	5.57231	2.51385e-08	1.83971e-07
Zfp128	12.3206	32.6958	4.38191	7.46152	8.55283e-14	8.88508e-13
Septin1	12.1411	22.3999	3.85433	5.81161	6.18744e-09	4.68719e-08
Tnfaip8	11.88	16.6495	4.40949	3.77584	0.000159468	0.000848202
Kcnab2	11.8073	23.2391	3.04292	7.6371	2.22165e-14	2.38036e-13
Mroh3	11.6831	34.5236	4.38193	7.87862	3.3102e-15	3.69143e-14
Gm10461	11.6356	20.7879	2.95124	7.04379	1.87078e-12	1.80399e-11
Ahnak	11.6044	18.7398	2.78026	6.74031	1.58046e-11	1.43936e-10
Grb10	11.6025	12.7053	3.37576	3.7637	0.000167418	0.000888183
Gm44799	11.5446	26.8638	3.5449	7.57814	3.50541e-14	3.70259e-13
Chd5	11.2877	19.9617	2.99819	6.65793	2.77714e-11	2.49456e-10
Stpg4	11.2502	28.2712	4.38194	6.45176	1.10557e-10	9.59429e-10
Meis1	11.1946	41.0432	4.38196	9.36642	7.50376e-21	1.07903e-19
Gm43113	11.1621	27.349	4.38194	6.2413	4.33948e-10	3.59278e-09
Ddr2	11.072	23.6376	3.76803	6.27319	3.5373e-10	2.95399e-09
Cacna1e	10.824	16.7198	3.77314	4.43126	9.36844e-06	5.65036e-05
Zfp324	10.7008	23.9614	3.43024	6.98536	2.84118e-12	2.7063e-11
Gm43266	10.6945	32.9042	4.38258	7.50795	6.00603e-14	6.29117e-13
Gm13525	10.6806	21.5879	3.59167	6.01053	1.8492e-09	1.45951e-08
Dennd4b	10.5264	7.96245	2.12227	3.75186	0.000175526	0.000929091
Gm48766	10.4454	15.3246	2.96441	5.16955	2.34662e-07	1.59157e-06
Zkscan2	10.3974	35.6539	4.28517	8.3203	8.77411e-17	1.05683e-15
Npas3	10.394	24.7031	2.78903	8.85723	8.20276e-19	1.08969e-17
Gm42636	10.2248	23.6295	3.11917	7.57557	3.57554e-14	3.77423e-13
Gm37959	10.1609	33.3014	4.38201	7.59958	2.97096e-14	3.16253e-13
A430072P03Rik	10.1157	28.014	4.38198	6.39302	1.62646e-10	1.39303e-09
Myl3	10.0995	27.3457	4.38198	6.2405	4.36181e-10	3.60763e-09
Cenpm	9.87308	25.7466	4.38306	5.87412	4.25107e-09	3.26254e-08
Kcnq1	9.74582	14.6765	3.19686	4.59091	4.41326e-06	2.73729e-05
Gm23025	9.62769	32.2057	4.38199	7.34956	1.98864e-13	2.03114e-12
4833412C15Rik	9.61235	24.6725	3.56272	6.9252	4.35374e-12	4.10414e-11
Gm5173	9.51631	23.9788	3.40513	7.04197	1.8954e-12	1.82665e-11
Gm47121	9.51445	19.6434	3.88034	5.06229	4.14249e-07	2.75377e-06
Zfp518b	9.48742	14.767	2.77339	5.32452	1.01217e-07	7.06668e-07
A330035P11Rik	9.26784	23.3826	4.38201	5.33605	9.49924e-08	6.66044e-07
Eno2	9.22535	38.7184	4.07748	9.49569	2.18759e-21	3.21913e-20
Fam110c	9.2206	22.012	4.38324	5.02186	5.1173e-07	3.37577e-06
Rec8	9.13027	22.747	4.15787	5.47082	4.47953e-08	3.22074e-07
Dbf4	9.08435	27.6529	4.40949	6.27122	3.5824e-10	2.99014e-09
4933431G14Rik	8.8935	23.2013	4.38226	5.29437	1.19427e-07	8.29213e-07
Gm29483	8.88245	24.252	4.38202	5.53442	3.12252e-08	2.27096e-07
Ifi30	8.76134	23.0134	2.64322	8.70657	3.13215e-18	4.05251e-17
Tmem81	8.71133	23.5957	4.38217	5.38448	7.2653e-08	5.14249e-07
Reep1	8.66173	39.4	4.38205	8.99122	2.445e-19	3.30156e-18
Frat1	8.45377	33.4585	2.87317	11.6451	2.42904e-31	5.28809e-30
Gm49694	8.35029	34.6886	4.38276	7.91478	2.47694e-15	2.77732e-14
Gsdme	8.32495	23.444	4.38224	5.34978	8.80609e-08	6.18767e-07
Fam178b	8.23772	26.7878	4.38205	6.11307	9.77299e-10	7.88817e-09
Ptp4a3	8.21733	22.4558	3.77311	5.95152	2.65658e-09	2.07279e-08
Gm11292	8.14158	27.8758	4.38206	6.36135	1.99993e-10	1.70488e-09
Cyp26c1	8.06958	29.3025	4.40949	6.64532	3.02554e-11	2.7073e-10
Ccnj	8.06323	20.3353	3.49318	5.82143	5.83478e-09	4.43438e-08
Gm43137	7.80427	23.8301	4.07821	5.84326	5.11878e-09	3.9047e-08
Myb	7.80423	23.1532	4.38266	5.28291	1.27151e-07	8.81717e-07
Fam78a	7.60452	23.0964	3.77417	6.1196	9.38124e-10	7.59065e-09
Armcx2	7.48196	21.8595	3.04272	7.18421	6.75956e-13	6.68332e-12
Il27ra	7.409	26.6215	4.3821	6.07506	1.23943e-09	9.91608e-09
Lamc3	7.33362	29.7329	3.72072	7.99116	1.33674e-15	1.52281e-14
4931414P19Rik	7.28395	14.8836	2.76105	5.39056	7.02368e-08	4.98222e-07
Plppr4	7.28252	38.2235	4.38215	8.72255	2.72007e-18	3.53329e-17
Ddx11	7.23172	22.7007	3.59118	6.32125	2.59464e-10	2.18684e-09
Zfp976	7.13366	16.9687	4.40949	3.84821	0.000118982	0.000642658
C130050O18Rik	7.0401	14.9999	3.63993	4.12094	3.77335e-05	0.000215453
Rps6ka6	6.94582	16.3534	2.97512	5.49673	3.86907e-08	2.79778e-07
Gm45131	6.90078	26.5103	4.38213	6.04962	1.45184e-09	1.1559e-08
Gm20554	6.88897	28.7041	4.38214	6.55025	5.74419e-11	5.06806e-10
Gm38037	6.68203	26.549	4.38215	6.05844	1.3745e-09	1.09593e-08
Nanos3	6.65019	29.4345	4.38215	6.71691	1.85623e-11	1.68397e-10
Plb1	6.61537	36.1814	4.38216	8.25651	1.49988e-16	1.79209e-15
Il17rb	6.61088	21.4234	4.38317	4.88766	1.02042e-06	6.5987e-06
Papln	6.58425	23.3739	4.24265	5.50928	3.60312e-08	2.60892e-07
Xrcc2	6.48684	17.5349	4.40925	3.97684	6.98376e-05	0.000388479
Gm31462	6.41759	15.7136	3.52807	4.45389	8.4329e-06	5.10489e-05
Gm43766	6.41396	22.3384	4.19431	5.32589	1.0046e-07	7.02281e-07
Engase	6.15368	14.7368	3.18973	4.62007	3.83603e-06	2.39012e-05
Gm26532	6.1262	21.1605	4.40949	4.79886	1.59568e-06	1.0167e-05
Papss2	6.04036	19.6983	4.2335	4.65297	3.27192e-06	2.04642e-05
Gm10240	5.95187	3.95195	0.875506	4.5139	6.36461e-06	3.90038e-05
As3mt	5.90393	24.0183	4.38222	5.48085	4.2328e-08	3.05272e-07
Ttc9	5.86933	35.9078	4.38295	8.1926	2.55646e-16	3.02586e-15
Prelid2	5.76752	23.295	4.38227	5.31573	1.0623e-07	7.40403e-07
Rps6-ps1	5.70683	4.98412	1.10734	4.50099	6.76387e-06	4.13269e-05
Gm45074	5.5354	30.5965	4.38226	6.98189	2.9123e-12	2.76922e-11
Pde1b	5.47638	24.1505	4.38226	5.51097	3.56868e-08	2.58627e-07
Trim67	5.45577	34.0286	4.38243	7.76479	8.17796e-15	8.89591e-14
Gprin2	5.36784	31.4781	4.38229	7.18302	6.81865e-13	6.73768e-12
Cox7c-ps1	5.36726	2.97582	0.631528	4.7121	2.45183e-06	1.54528e-05
Gm50268	5.35266	17.1732	4.40949	3.89459	9.83638e-05	0.000538414
B230362B09Rik	5.30903	26.8757	4.38228	6.1328	8.63441e-10	7.01407e-09
Necab3	5.21459	16.8302	4.40949	3.81681	0.000135189	0.000725417
Hgfac	5.19033	36.977	4.40949	8.38578	5.03896e-17	6.15068e-16
Gm28991	5.16817	26.812	4.3823	6.11824	9.46167e-10	7.65196e-09
Greb1l	5.16742	35.0181	4.38472	7.9864	1.38932e-15	1.57832e-14
Plcl1	5.10724	14.5922	3.85498	3.78528	0.000153537	0.000818514
Apol6	5.04959	26.449	4.38232	6.03539	1.58582e-09	1.2589e-08
Capn6	5.04725	40.5286	4.38394	9.24479	2.35701e-20	3.31945e-19
Gm13340	4.9798	2.54715	0.643278	3.95964	7.50634e-05	0.000416417
A730090N16Rik	4.92702	21.4487	3.55624	6.03128	1.62667e-09	1.29008e-08
Ckap2l	4.88957	22.6973	4.38235	5.17924	2.2279e-07	1.51355e-06
Gm13339	4.83751	2.42486	0.639313	3.79292	0.000148888	0.000795801
Gm48717	4.83112	27.6356	4.38235	6.30611	2.86136e-10	2.40176e-09
Mc5r	4.80851	26.7323	4.40949	6.06245	1.34066e-09	1.06998e-08
Gm45843	4.80209	27.9266	4.38235	6.37252	1.85948e-10	1.58763e-09
Efcab6	4.79674	27.1413	4.38235	6.19333	5.89077e-10	4.82354e-09
Crtam	4.77441	22.2382	4.38351	5.07316	3.91263e-07	2.6073e-06
Aqp7	4.73204	22.3058	3.61758	6.16595	7.00628e-10	5.72552e-09
Pnmt	4.68733	20.6931	4.26689	4.84968	1.23659e-06	7.92474e-06
Gm10163	4.66689	5.96565	1.32969	4.4865	7.24035e-06	4.41067e-05
Tango6	4.6147	19.8272	3.08542	6.42608	1.3094e-10	1.12974e-09
Armcx1	4.58712	22.2689	4.10683	5.42242	5.87991e-08	4.19412e-07
Inpp4b	4.51563	25.7702	4.3824	5.88039	4.09292e-09	3.14411e-08
Gm16150	4.42959	32.129	4.38242	7.33135	2.27841e-13	2.31413e-12
Entpd3	4.39608	22.4389	3.96226	5.66314	1.48628e-08	1.10247e-07
Gm42675	4.36622	26.0101	4.38242	5.9351	2.93658e-09	2.28041e-08
Gm42480	4.36222	22.8736	4.38243	5.21939	1.79513e-07	1.23076e-06
Gm43101	4.26486	25.8587	4.38244	5.90052	3.62368e-09	2.79675e-08
Gm28693	4.1576	27.9141	4.40949	6.33046	2.44432e-10	2.06758e-09
Gm48611	4.10931	27.3942	4.38247	6.25086	4.08197e-10	3.38642e-09
Gm13453	4.04245	3.67893	0.593001	6.20392	5.50742e-10	4.51641e-09
Aknad1	4.00992	38.2037	4.38251	8.71732	2.84865e-18	3.69154e-17
Lrrc7	3.97599	38.8409	4.40026	8.82695	1.07564e-18	1.42546e-17
C030032O16Rik	3.96816	29.1744	4.3825	6.65701	2.79458e-11	2.50885e-10
4930430F21Rik	3.84127	28.3937	4.38253	6.47883	9.24396e-11	8.07762e-10
2500002B13Rik	3.82622	28.3303	4.38254	6.46437	1.01724e-10	8.85586e-10
Chst15	3.81286	25.2056	4.40949	5.71623	1.08915e-08	8.12303e-08
Gm42676	3.80814	29.0524	4.38254	6.62912	3.37692e-11	3.01349e-10
9530080O11Rik	3.76707	21.2794	4.38592	4.85175	1.2238e-06	7.85194e-06
Gad2	3.67925	26.2895	4.38264	5.99855	1.99092e-09	1.56683e-08
Gm50423	3.65431	26.8436	4.38258	6.12507	9.06437e-10	7.34878e-09
Gm5148	3.56385	47.302	4.38378	10.7902	3.82812e-27	7.15558e-26
Bdh1	3.35525	28.3771	4.40949	6.43547	1.23093e-10	1.06427e-09
Gsdma	3.33763	16.6986	4.40949	3.78696	0.000152499	0.00081351
Tmem254c	3.29585	2.99213	0.659198	4.53905	5.65085e-06	3.48119e-05
Wdr63	3.19697	16.3818	3.9557	4.14131	3.45322e-05	0.000197725
Gm30275	3.10776	27.1539	4.38274	6.19564	5.80503e-10	4.75572e-09
Gm45734	3.0003	3.24895	0.833158	3.89956	9.63665e-05	0.000528517
Gm26315	2.97293	5.95096	1.54413	3.85391	0.000116244	0.000628699
Dnph1	2.81182	17.8868	4.40891	4.05697	4.97138e-05	0.000280343
Gm49227	2.7486	19.0251	4.39443	4.32937	1.49534e-05	8.83994e-05
Cyp4f39	2.7424	17.5658	4.40949	3.98364	6.7867e-05	0.000378159
Acot4	2.5574	24.2788	4.40949	5.50604	3.66994e-08	2.65613e-07
Gm12993	2.41453	24.6185	4.40949	5.58308	2.36297e-08	1.73161e-07
Gm21798	2.35659	3.74392	0.979077	3.82393	0.000131343	0.000705704
Zfp786	2.20098	17.7235	4.40949	4.01939	5.83482e-05	0.000327009
Prr5	1.92953	26.1399	4.40949	5.9281	3.06466e-09	2.37761e-08
Gm3294	1.64121	18.3081	4.40949	4.15198	3.2961e-05	0.00018939
Gm35025	1.2345	28.7904	4.40949	6.52919	6.61279e-11	5.81252e-10
Gm39317	0.814524	2.712	0.681173	3.98136	6.85213e-05	0.000381287

## Sheet: P60 SC-enriched genes
Gene	baseMean	log2 Fold Change	lfcSE	stat	pvalue	padj			Figure 6-figure supplement 1A
Clu	45517.1	-6.01223	1.09011	-5.51526	3.48257e-08	2.52722e-07			All genes were listed that were expressed in a much higher level in P60_WT SCs than in P30_WT OHCs
Sparc	20271.6	-9.47298	1.40305	-6.75173	1.46094e-11	1.33496e-10
Dbi	18665.4	-5.89817	0.521439	-11.3113	1.15304e-29	2.34805e-28
Fabp3	18101.9	-6.59298	1.26352	-5.21793	1.80936e-07	1.23896e-06
Anxa5	18101.9	-3.07692	0.533155	-5.77115	7.87317e-09	5.91227e-08
Id2	13821.3	-3.84706	0.625892	-6.14653	7.91985e-10	6.456e-09
Actg1	12933.2	-2.35259	0.330721	-7.11354	1.13108e-12	1.10171e-11
Odf3l2	12688.9	-18.1216	0.931926	-19.4454	3.1907e-84	3.68346e-82
Mdm1	12303.2	-8.35242	1.07412	-7.77609	7.48004e-15	8.17469e-14
Ctsb	10217.8	-4.04901	0.628036	-6.4471	1.14008e-10	9.8781e-10
Gsn	9873.55	-30.5996	1.57096	-19.4782	1.67974e-84	1.9855e-82
Fos	9644.53	-7.36082	1.0093	-7.29297	3.03188e-13	3.05668e-12
Actb	8314.96	-4.226	0.420496	-10.05	9.18231e-24	1.49628e-22
Prdx6	8223.38	-4.92053	0.622235	-7.90783	2.61913e-15	2.93075e-14
Plekhb1	8011.77	-2.6216	0.502997	-5.21195	1.86864e-07	1.27636e-06
Anxa4	7622.26	-11.5644	0.83551	-13.8412	1.43818e-43	4.71523e-42
Egr1	6680.67	-5.32212	1.00897	-5.2748	1.32898e-07	9.20019e-07
Prdx2	6561.32	-2.98367	0.471936	-6.3222	2.57859e-10	2.17442e-09
S100a13	6200.15	-4.44496	0.68625	-6.47717	9.34566e-11	8.1578e-10
Epcam	6127.94	-3.58348	0.60063	-5.9662	2.42849e-09	1.90116e-08
Cd24a	6107.61	-4.34468	0.959902	-4.52617	6.00614e-06	3.69174e-05
Actn4	5938.34	-3.37031	0.450216	-7.48598	7.10129e-14	7.41002e-13
Btg2	5837.64	-3.97322	0.737048	-5.39072	7.01746e-08	4.98141e-07
Zbtb20	5795.33	-3.15924	0.56396	-5.60188	2.12041e-08	1.55804e-07
Far1	5722.32	-5.44595	0.661222	-8.2362	1.77771e-16	2.11327e-15
Tuba1a	5562.16	-2.24473	0.5014	-4.47692	7.57289e-06	4.60469e-05
Apoc3	5339.55	-23.5471	1.47459	-15.9686	2.11549e-57	1.11868e-55
Lamp1	5298.98	-2.15653	0.415681	-5.18794	2.12632e-07	1.44814e-06
Scd1	5214.98	-5.85524	0.795477	-7.36067	1.82993e-13	1.87371e-12
Stmn1	5034.55	-6.94365	1.05715	-6.5683	5.08927e-11	4.49749e-10
Cyb5a	5020.14	-3.7951	0.742572	-5.11075	3.20875e-07	2.15402e-06
Ceacam16	4750.39	-6.13814	1.32482	-4.6332	3.60052e-06	2.24851e-05
Nr1d1	4716.58	-4.2354	0.84432	-5.01634	5.26643e-07	3.46857e-06
Map1lc3b	4715.42	-2.534	0.40156	-6.3104	2.7831e-10	2.33846e-09
Junb	4633.51	-3.40965	0.682281	-4.99743	5.80994e-07	3.8158e-06
Acsl3	4612.6	-4.3842	0.735924	-5.9574	2.56275e-09	2.0034e-08
Dusp1	4482.9	-3.00984	0.71891	-4.18668	2.83066e-05	0.000163506
Septin7	4418.35	-3.7726	0.742002	-5.08436	3.68863e-07	2.46405e-06
Ubc	4407.58	-2.38853	0.279306	-8.55167	1.21319e-17	1.52397e-16
9530077C05Rik	4371.89	-4.5046	0.863126	-5.21893	1.79956e-07	1.23329e-06
Pttg1ip	4364.57	-2.47956	0.536782	-4.61931	3.85013e-06	2.39799e-05
Prdx1	4305.26	-2.26898	0.509144	-4.45645	8.33274e-06	5.04986e-05
Dstn	4301.94	-2.13919	0.564199	-3.79155	0.000149708	0.000799661
Ptma	4209.55	-2.92907	0.4579	-6.39675	1.58715e-10	1.36292e-09
Socs2	4181.93	-3.74945	0.729603	-5.13903	2.76165e-07	1.86227e-06
Fasn	4178.93	-6.02558	0.822927	-7.32213	2.44066e-13	2.47431e-12
Gng5	4158.43	-3.99982	0.393867	-10.1552	3.14015e-24	5.23668e-23
Gas2	4155.28	-5.98533	1.01804	-5.87926	4.12095e-09	3.16416e-08
Tpd52	4151.55	-3.8598	0.686264	-5.62436	1.862e-08	1.37247e-07
Bace2	4145.71	-7.33408	1.51286	-4.84784	1.24816e-06	7.99573e-06
Serinc2	4144.01	-3.78982	0.620246	-6.11018	9.95172e-10	8.01664e-09
Gjb6	4109.42	-16.4494	1.12106	-14.6731	9.58458e-49	3.76787e-47
Akr1a1	4078.61	-2.90885	0.447182	-6.50486	7.77676e-11	6.81735e-10
Cnn3	4072.4	-14.9726	0.732997	-20.4266	9.70131e-93	1.62279e-90
Twf1	4067.35	-3.10256	0.3907	-7.94104	2.00488e-15	2.26038e-14
Dpp4	4018.28	-8.79043	0.90464	-9.71705	2.55059e-22	3.90399e-21
Sypl	3999.44	-6.42993	0.868821	-7.40076	1.35406e-13	1.39605e-12
G6pdx	3984.75	-5.61403	0.997115	-5.63027	1.79927e-08	1.32922e-07
Tspan8	3984.61	-15.413	0.788861	-19.5383	5.18818e-85	6.29999e-83
Cd9	3896.37	-14.5253	0.960313	-15.1256	1.09743e-51	4.8622e-50
Pde6d	3870.78	-4.3686	0.658106	-6.63813	3.17683e-11	2.83803e-10
Parm1	3808.15	-3.21664	0.697847	-4.60938	4.03868e-06	2.51281e-05
Herpud1	3772.29	-4.23191	0.736764	-5.74391	9.25141e-09	6.92821e-08
Rflnb	3751.05	-5.82238	0.843217	-6.90496	5.02162e-12	4.72015e-11
Fdft1	3731.89	-2.58579	0.674683	-3.8326	0.000126796	0.000682393
Tesc	3686.2	-2.4258	0.499766	-4.85386	1.2108e-06	7.77771e-06
Cd164	3661.76	-6.43563	0.83756	-7.68379	1.54453e-14	1.66138e-13
Zfp36	3566.92	-14.2439	0.833542	-17.0883	1.81248e-65	1.21771e-63
Tmod1	3470.41	-6.46492	0.812277	-7.959	1.73432e-15	1.96074e-14
Ces1d	3440.33	-31.0903	1.27635	-24.3588	4.67982e-131	2.95063e-128
Cfl1	3402.25	-3.02928	0.477731	-6.34099	2.28296e-10	1.93809e-09
Enho	3391.58	-5.80753	1.09933	-5.28278	1.27239e-07	8.81883e-07
Cyb5r3	3289.43	-9.32494	0.666742	-13.9858	1.90247e-44	6.44363e-43
Elovl1	3276.68	-8.61843	1.40436	-6.13691	8.41435e-10	6.84208e-09
Map2k1	3233.25	-4.71222	0.617232	-7.63445	2.2679e-14	2.42833e-13
Glmp	3187.02	-2.83958	0.602996	-4.70912	2.48792e-06	1.56622e-05
Otog	3164.75	-30.8305	1.34788	-22.8733	8.57561e-116	3.42878e-113
Ier2	3152.2	-5.82311	0.881385	-6.60677	3.92807e-11	3.49961e-10
Spg21	3114.56	-2.3999	0.634772	-3.78073	0.000156367	0.000832788
Fkbp4	3067.27	-2.53651	0.504062	-5.03214	4.85025e-07	3.20476e-06
Tuba4a	3046.88	-4.66606	0.774159	-6.02726	1.6676e-09	1.32127e-08
Slc44a2	2965.08	-3.46672	0.684711	-5.06305	4.12612e-07	2.74622e-06
Stx7	2952.88	-5.92577	0.79885	-7.41788	1.19014e-13	1.23014e-12
Mat2a	2946.79	-2.29297	0.609138	-3.76428	0.000167028	0.000886685
Bcam	2841.65	-12.1817	0.776127	-15.6955	1.62291e-55	8.01337e-54
Laptm4a	2804.79	-3.64176	0.618241	-5.89052	3.84978e-09	2.96567e-08
Rnd2	2703.31	-6.33913	0.974404	-6.50565	7.73585e-11	6.78511e-10
Cers2	2637.45	-7.4405	1.28458	-5.79216	6.94877e-09	5.24694e-08
Lamp2	2636.34	-2.15395	0.538009	-4.00356	6.2396e-05	0.000348622
Scamp1	2624.89	-6.80463	0.819297	-8.30544	9.94472e-17	1.19519e-15
Fgfr3	2600.85	-5.94198	0.854928	-6.95027	3.64587e-12	3.45273e-11
Bzw1	2591.26	-2.82745	0.627204	-4.50803	6.54333e-06	4.00391e-05
S100b	2518.73	-8.39703	1.42232	-5.90377	3.55288e-09	2.7434e-08
Gnai2	2399.74	-2.25477	0.431387	-5.2268	1.72469e-07	1.18396e-06
Cdkn1a	2398.18	-7.78367	1.21474	-6.4077	1.47728e-10	1.27124e-09
Rorb	2385.27	-2.19586	0.512386	-4.28556	1.82276e-05	0.00010706
Tgoln1	2378.27	-2.29368	0.453041	-5.06285	4.13026e-07	2.74675e-06
Cd47	2348.83	-4.21542	0.833205	-5.05928	4.20832e-07	2.79413e-06
Cldn3	2346.31	-24.7053	1.05024	-23.5235	2.34248e-122	1.06667e-119
Rtn1	2324.4	-3.78986	0.927849	-4.08457	4.41586e-05	0.000250135
Kcnk1	2287.56	-2.42761	0.571229	-4.2498	2.13965e-05	0.000124912
Ppp2r1a	2286.73	-3.77265	0.762782	-4.94591	7.57907e-07	4.94207e-06
Wls	2271.01	-14.3362	0.752605	-19.0488	6.72511e-81	6.8475e-79
Rab7	2257.81	-3.41203	0.742749	-4.59378	4.35284e-06	2.70084e-05
Rassf6	2255.4	-15.0757	0.896679	-16.8128	1.96655e-63	1.24952e-61
Scd2	2252.66	-3.74017	0.783785	-4.77193	1.82468e-06	1.15803e-05
Bdh2	2251.93	-14.9676	0.993533	-15.065	2.7511e-51	1.19944e-49
Sptbn1	2248.01	-2.14968	0.500945	-4.29125	1.77672e-05	0.000104393
Cav2	2215.79	-12.087	1.45215	-8.32353	8.53783e-17	1.02912e-15
WPRE	2207.61	-3.42399	0.382398	-8.95399	3.42858e-19	4.61451e-18
Tspo	2174.19	-4.3723	0.811877	-5.38542	7.22754e-08	5.11797e-07
Ehd3	2139.62	-14.9995	0.902101	-16.6272	4.42519e-62	2.68675e-60
Glul	2134.36	-6.72575	1.41745	-4.74497	2.08539e-06	1.32093e-05
Rab8b	2120.41	-4.71537	0.860892	-5.47731	4.31852e-08	3.11044e-07
Paip2	2109.17	-2.50733	0.412025	-6.08538	1.16217e-09	9.31155e-09
Irgm1	2106.55	-7.66035	1.28963	-5.93995	2.85109e-09	2.21927e-08
Sirt2	2101.37	-2.66997	0.623293	-4.28365	1.83852e-05	0.000107909
Rab6a	2094.1	-2.8501	0.489	-5.82841	5.59569e-09	4.25465e-08
Fzd9	2060.27	-23.9771	1.32333	-18.1188	2.26542e-73	1.95458e-71
Liph	2016.58	-8.28671	1.24488	-6.65663	2.80169e-11	2.51385e-10
Kcnj16	2007.83	-11.9302	1.42538	-8.36984	5.7697e-17	7.03217e-16
Slc12a7	1947.4	-2.76051	0.727523	-3.7944	0.000148001	0.000791319
Enah	1942.55	-2.43608	0.411574	-5.91893	3.24039e-09	2.51157e-08
Errfi1	1915.98	-3.87907	0.861457	-4.50291	6.70283e-06	4.09693e-05
Pfn1	1906.85	-2.24743	0.479659	-4.68548	2.7931e-06	1.75229e-05
Septin2	1890.84	-2.87946	0.643289	-4.47616	7.5998e-06	4.61934e-05
Tor1aip2	1870.77	-2.27609	0.601961	-3.78113	0.000156116	0.000831723
Tnfrsf12a	1863.81	-4.40587	0.974136	-4.52285	6.10123e-06	3.74738e-05
Clstn1	1862.26	-2.72258	0.535643	-5.08282	3.71866e-07	2.4831e-06
Smagp	1858.35	-5.14064	0.941703	-5.45887	4.79162e-08	3.43759e-07
Klf6	1852.43	-4.71109	1.08399	-4.34607	1.38601e-05	8.22327e-05
Plxnb2	1826.3	-11.5746	0.882161	-13.1207	2.50498e-39	7.09226e-38
Rap1b	1823.39	-3.0966	0.69886	-4.43093	9.38292e-06	5.65493e-05
Sec22b	1814.36	-2.3204	0.59556	-3.89616	9.77312e-05	0.000535464
Id1	1809.88	-5.52551	1.03752	-5.32569	1.00569e-07	7.02741e-07
Psat1	1809.87	-13.309	0.744449	-17.8777	1.76041e-71	1.44292e-69
Rnf13	1809.23	-2.34093	0.606855	-3.85747	0.000114567	0.000620245
Trpm3	1803.5	-7.97316	1.25899	-6.33299	2.4046e-10	2.03608e-09
S100a10	1782.7	-13.5308	0.751675	-18.0009	1.91849e-72	1.60458e-70
Tsc22d3	1779.72	-6.78157	1.68833	-4.01673	5.90116e-05	0.000330276
Pdia4	1770.77	-5.20099	0.849677	-6.12114	9.29074e-10	7.52485e-09
Arhgdia	1759.35	-3.52754	0.777404	-4.53759	5.69018e-06	3.50198e-05
Tprgl	1746.3	-3.32257	0.778842	-4.26604	1.98971e-05	0.000116407
Cdh1	1735.92	-11.79	0.675132	-17.4632	2.73238e-68	2.02678e-66
Mal	1723.24	-15.6051	1.4791	-10.5504	5.05904e-26	9.1035e-25
Car14	1707.76	-6.86117	1.71574	-3.99895	6.36253e-05	0.000355249
Ppp1r2	1692.14	-2.93874	0.695169	-4.22738	2.36433e-05	0.000137441
Cmtm7	1686.55	-5.60199	0.770682	-7.26887	3.6251e-13	3.63463e-12
Fmn1	1680.51	-3.61883	0.900773	-4.01747	5.88263e-05	0.000329463
Socs6	1618.51	-7.76982	0.987123	-7.87118	3.51322e-15	3.91517e-14
Tmem79	1618.04	-7.7446	1.23567	-6.26752	3.66835e-10	3.05876e-09
Fam107a	1612.68	-31.9232	1.41773	-22.5172	2.81777e-112	9.82802e-110
Ctnna1	1592.61	-3.84523	0.797465	-4.82181	1.42262e-06	9.08491e-06
Hmgn1	1588.07	-5.39784	0.946213	-5.70468	1.16563e-08	8.68552e-08
Rcn2	1583.05	-5.37062	0.904772	-5.93589	2.92257e-09	2.27168e-08
Slc27a1	1575.82	-4.00408	0.71344	-5.61236	1.9959e-08	1.46787e-07
Morf4l1	1575.22	-2.02356	0.401727	-5.03714	4.72538e-07	3.1273e-06
Arf4	1566.58	-3.71053	0.760591	-4.87848	1.06907e-06	6.90789e-06
Tpm3	1564.45	-3.91079	0.672523	-5.8151	6.05984e-09	4.5969e-08
Dync1i1	1561.65	-7.00203	1.57547	-4.44441	8.81328e-06	5.32533e-05
Vamp8	1555.54	-2.85137	0.643073	-4.43397	9.25132e-06	5.58178e-05
Lonp2	1550.85	-4.16149	0.800408	-5.1992	2.00143e-07	1.36422e-06
Pde4dip	1550.29	-5.82571	0.889703	-6.54793	5.83403e-11	5.13903e-10
Tspan12	1534.63	-13.931	0.814845	-17.0965	1.57539e-65	1.07159e-63
Nudt4	1515.23	-3.53184	0.863451	-4.09038	4.30667e-05	0.000244372
Carhsp1	1509.85	-2.98724	0.727751	-4.10475	4.0475e-05	0.000230384
Npc1	1506.37	-4.94636	0.787755	-6.27906	3.40617e-10	2.8474e-09
Aph1b	1490.96	-3.68901	0.851819	-4.33075	1.48603e-05	8.79122e-05
Dll3	1487.76	-15.041	1.35027	-11.1393	8.07713e-29	1.59528e-27
Gjb2	1479.67	-8.11424	1.23197	-6.58641	4.50586e-11	3.99268e-10
Btg1	1472.81	-3.73637	0.651611	-5.73404	9.80651e-09	7.32717e-08
Tubb2a	1471.32	-5.04333	0.989226	-5.09826	3.42783e-07	2.29544e-06
Amd1	1465.37	-3.10202	0.727369	-4.26471	2.00161e-05	0.00011702
Mtarc2	1465.24	-2.52746	0.661576	-3.82036	0.000133259	0.000715532
Tuba1b	1462.62	-3.7888	0.546893	-6.92787	4.27239e-12	4.0344e-11
Rnf181	1462.51	-2.4933	0.568593	-4.38503	1.15969e-05	6.93557e-05
Mbnl2	1461.3	-13.4667	0.635812	-21.1804	1.44872e-99	3.44186e-97
Aktip	1458.71	-3.47974	0.756889	-4.59743	4.27734e-06	2.656e-05
Epb41l4a	1457.43	-10.6521	0.986074	-10.8025	3.34921e-27	6.28187e-26
Pnpla2	1442.49	-3.955	0.939007	-4.2119	2.53233e-05	0.000146739
Sec61a1	1439.32	-3.4643	0.64065	-5.40747	6.39224e-08	4.54612e-07
Hs3st1	1417.62	-14.3182	1.14188	-12.5391	4.55975e-36	1.1716e-34
Sox9	1414.28	-28.8096	1.07718	-26.7454	1.39806e-157	3.27406e-154
Rbbp7	1390.61	-2.68013	0.673055	-3.98203	6.83279e-05	0.000380339
Egfl6	1381.46	-30.7622	1.51037	-20.3673	3.26272e-92	5.19279e-90
Ech1	1362.82	-2.25706	0.587757	-3.84012	0.000122976	0.00066314
Pqlc3	1361.2	-22.562	2.14612	-10.5129	7.53394e-26	1.34977e-24
Sbds	1349.48	-2.8105	0.624441	-4.50082	6.76903e-06	4.1343e-05
Laptm4b	1344.85	-3.33156	0.862428	-3.863	0.000112004	0.000607775
Cd82	1342.62	-3.23492	0.826448	-3.91424	9.06899e-05	0.000498886
Nfib	1332.19	-3.61117	0.721843	-5.00271	5.65304e-07	3.71573e-06
Rac1	1329.95	-5.37463	0.868979	-6.18499	6.21057e-10	5.08033e-09
Mpzl1	1327.13	-9.00011	0.849957	-10.5889	3.35505e-26	6.084e-25
B2m	1297.59	-6.67027	1.23831	-5.38659	7.18072e-08	5.08702e-07
Inpp5j	1258.16	-12.2034	0.946461	-12.8937	4.88203e-38	1.32502e-36
Mapk3	1251.47	-2.73241	0.668653	-4.08643	4.38054e-05	0.000248306
Smox	1244.49	-4.17124	0.987375	-4.22458	2.39388e-05	0.00013911
Syne2	1241.63	-5.43161	0.759159	-7.15477	8.3812e-13	8.24688e-12
Npc2	1237.9	-5.41972	0.919668	-5.89312	3.78967e-09	2.92211e-08
Mycl	1235.95	-6.78343	1.1992	-5.65664	1.54364e-08	1.1445e-07
Kif2a	1234.32	-2.73582	0.660377	-4.14282	3.43056e-05	0.000196565
Ptp4a1	1224.04	-3.43019	0.729864	-4.69977	2.60458e-06	1.63652e-05
Grb14	1217.56	-30.7416	1.08774	-28.2618	1.01831e-175	8.34656e-172
Sh3bgrl3	1207.76	-3.10615	0.710744	-4.37027	1.2409e-05	7.39983e-05
Lgr5	1203.73	-4.97728	1.32824	-3.74726	0.000178774	0.00094476
Pgk1	1203.42	-3.75262	0.876787	-4.27997	1.86922e-05	0.000109671
Sipa1l1	1202.75	-3.37818	0.820337	-4.11804	3.82102e-05	0.000217795
Maea	1193.38	-3.94898	0.813856	-4.85218	1.22111e-06	7.83775e-06
Ecm1	1192.57	-17.0283	1.83828	-9.26318	1.98438e-20	2.81158e-19
Arhgap35	1190.32	-2.87261	0.694589	-4.1357	3.53875e-05	0.000202551
Snx31	1188.26	-20.0091	2.24283	-8.92133	4.60711e-19	6.17534e-18
Camta1	1188.19	-3.43794	0.799602	-4.29957	1.71131e-05	0.000100658
Rps6ka1	1185.61	-13.0647	0.798317	-16.3653	3.3817e-60	1.93833e-58
Rnd1	1179.13	-3.83026	0.869719	-4.40402	1.06262e-05	6.37377e-05
Fgfr1	1178.78	-5.62802	1.14971	-4.89517	9.82226e-07	6.35674e-06
Nr4a1	1170.48	-6.04347	1.47356	-4.10127	4.10892e-05	0.000233799
Arl15	1166.66	-3.38958	0.779161	-4.35029	1.35955e-05	8.07212e-05
Nipal2	1151	-13.5232	0.769226	-17.5803	3.48673e-69	2.6462e-67
Ndrg2	1143.89	-7.01797	1.40122	-5.00847	5.48652e-07	3.60917e-06
Rab31	1142.68	-5.09785	1.16493	-4.37609	1.20827e-05	7.21309e-05
Cbx5	1140.8	-4.22888	0.787226	-5.37187	7.79231e-08	5.49416e-07
Tns1	1118.91	-30.7344	1.35956	-22.6062	3.76657e-113	1.40331e-110
Lgals3	1109.27	-27.5731	1.98559	-13.8866	7.6405e-44	2.52014e-42
Scrn1	1106.46	-5.53627	0.898962	-6.15852	7.34281e-10	5.99754e-09
Prelid1	1101.28	-3.24678	0.759181	-4.27669	1.89696e-05	0.000111219
Nrep	1075.47	-29.8115	1.45218	-20.5288	1.19029e-93	2.12091e-91
Serpine2	1068.24	-30.738	1.70017	-18.0794	4.63157e-73	3.95445e-71
Tkt	1056.19	-2.88091	0.764597	-3.76789	0.000164636	0.000874555
Mctp1	1051.17	-8.33943	1.41697	-5.88537	3.97153e-09	3.05515e-08
Cav1	1050.15	-14.5983	1.21888	-11.9768	4.69937e-33	1.08809e-31
Tspan14	1040.73	-12.6213	0.870294	-14.5023	1.17141e-47	4.46581e-46
Itpr2	1037.56	-12.8779	0.910478	-14.1441	2.03043e-45	7.03698e-44
Paqr8	1037.14	-13.6179	0.96687	-14.0845	4.72944e-45	1.62536e-43
Tm4sf1	1030.85	-6.3421	1.38735	-4.57139	4.84501e-06	2.99827e-05
Cldn23	1028.53	-6.92611	1.0268	-6.74531	1.52701e-11	1.39223e-10
Cadps2	1028.33	-23.9756	1.77952	-13.4731	2.25253e-41	6.77538e-40
Ezr	1014.33	-3.66672	0.936269	-3.91631	8.99144e-05	0.000494952
Tmem171	1008.28	-13.4605	1.06133	-12.6826	7.38408e-37	1.93366e-35
Ptprf	990.996	-4.8965	0.831944	-5.88561	3.96585e-09	3.05221e-08
Marcksl1	988.068	-4.62187	0.972494	-4.7526	2.00822e-06	1.27353e-05
Sh3bgrl	984.689	-9.43508	0.890855	-10.591	3.27931e-26	5.95984e-25
Zp1	969.283	-14.4809	1.62874	-8.8909	6.06171e-19	8.09198e-18
Tpm4	961.308	-7.71791	1.04523	-7.38396	1.53649e-13	1.57719e-12
Washc2	948.998	-3.77251	0.876616	-4.30349	1.68126e-05	9.89974e-05
Mal2	947.617	-13.8787	0.989086	-14.0319	9.94779e-45	3.39031e-43
Clic1	937.782	-11.7894	0.892854	-13.2042	8.29711e-40	2.39884e-38
Slc9a3r1	932.742	-11.6286	0.879003	-13.2293	5.94436e-40	1.72166e-38
Pde4b	927.923	-5.86887	0.841008	-6.97838	2.98603e-12	2.83603e-11
Litaf	906.027	-4.32264	0.887295	-4.87171	1.10639e-06	7.13496e-06
Tsnax	903.781	-4.31728	0.782805	-5.51514	3.48504e-08	2.52789e-07
Bspry	903.074	-4.89107	0.94841	-5.15713	2.50765e-07	1.69657e-06
Ralbp1	902.446	-2.45644	0.64402	-3.81423	0.000136609	0.000732801
Pisd	895.328	-11.5209	0.844402	-13.6438	2.19802e-42	6.91594e-41
Arf6	885.118	-2.63999	0.683946	-3.85994	0.000113417	0.000614422
Plpp2	879.467	-29.7996	1.17448	-25.3726	5.06122e-142	6.3822e-139
Mpzl2	871.013	-29.4383	1.48397	-19.8375	1.4123e-87	1.88226e-85
Paqr6	869.512	-10.2349	1.90423	-5.37481	7.6664e-08	5.41005e-07
Tollip	864.955	-3.22123	0.828054	-3.89012	0.000100193	0.000547272
Cdkn1c	861.467	-20.5223	1.49034	-13.7702	3.84971e-43	1.23985e-41
Tmsb10	860.922	-10.1405	0.611892	-16.5724	1.10261e-61	6.52533e-60
Fxyd6	858.35	-14.3077	1.27069	-11.2598	2.07331e-29	4.18054e-28
Aldh3a2	843.48	-13.4727	0.912494	-14.7647	2.47373e-49	1.00128e-47
Sgk3	836.68	-13.2062	0.983408	-13.429	4.08868e-41	1.22533e-39
Aldh1a3	830.438	-14.0457	1.75865	-7.98662	1.38692e-15	1.57668e-14
Zyx	818.46	-30.1612	1.2232	-24.6575	3.0567e-134	2.50543e-131
Cpq	816.706	-4.84216	1.10729	-4.37299	1.22557e-05	7.31102e-05
Atp11b	816.313	-4.43823	0.794718	-5.58467	2.3415e-08	1.71665e-07
Rhoc	815.776	-11.8301	1.0322	-11.461	2.07029e-30	4.34549e-29
Galm	808.039	-13.6767	1.26065	-10.8489	2.01786e-27	3.82414e-26
Wdyhv1	806.674	-3.84851	0.927663	-4.14861	3.345e-05	0.000191931
Anxa7	794.97	-4.23334	1.0746	-3.93947	8.16623e-05	0.000450889
Ptpn11	793.812	-3.12449	0.760325	-4.10941	3.96663e-05	0.000225938
Ppp3r1	788.472	-3.37558	0.891364	-3.78698	0.00015249	0.00081351
Chmp4c	783.991	-3.74765	0.900219	-4.16304	3.14039e-05	0.000180633
Tmcc3	774.958	-6.2237	0.757272	-8.21858	2.05929e-16	2.44269e-15
Tmem221	772.685	-31.0307	1.28378	-24.1714	4.44749e-129	2.51406e-126
Coq2	770.398	-3.35284	0.869124	-3.85773	0.000114447	0.000619799
Dbp	769.31	-4.06978	0.773674	-5.26033	1.43799e-07	9.938e-07
Rras2	768.501	-30.1859	1.33773	-22.565	9.57696e-113	3.41294e-110
Pcyt2	763.789	-3.75106	0.986586	-3.80206	0.000143499	0.000767999
Gng12	762.074	-13.4042	0.894723	-14.9814	9.71921e-51	4.12764e-49
Chil1	749.972	-29.9474	1.48671	-20.1435	3.07064e-90	4.53486e-88
Samd9l	748.531	-26.4966	1.43443	-18.4719	3.47433e-76	3.29218e-74
Fblim1	746.059	-12.1833	1.28519	-9.47978	2.54819e-21	3.71973e-20
Cmtm8	735.313	-12.6546	0.605413	-20.9024	5.08935e-97	1.05607e-94
Nck2	731.626	-3.5297	0.801255	-4.40521	1.0568e-05	6.34582e-05
Iqgap1	724.913	-10.1831	0.825852	-12.3304	6.21572e-35	1.52995e-33
Kcnj10	723.38	-30.2192	1.86827	-16.175	7.57114e-59	4.22156e-57
Tank	723.106	-4.06489	1.06051	-3.83296	0.00012661	0.000681617
Car13	722.026	-12.8218	0.879762	-14.5742	4.10097e-48	1.5781e-46
Crlf1	721.819	-21.6037	1.49321	-14.4679	1.93196e-47	7.29737e-46
Pea15a	720.427	-6.21139	1.19162	-5.21257	1.86244e-07	1.27319e-06
Rhou	714.092	-12.7038	0.772235	-16.4506	8.29744e-61	4.80636e-59
Cntn1	711.781	-12.8105	1.12623	-11.3747	5.58823e-30	1.15085e-28
Smim3	710.973	-28.691	1.71696	-16.7103	1.10244e-62	6.92424e-61
Maged1	704.653	-28.1116	1.30399	-21.5582	4.43683e-103	1.13645e-100
Acss3	703.27	-13.8372	1.057	-13.091	3.7077e-39	1.04433e-37
Fosb	700.604	-9.12698	0.998466	-9.141	6.18761e-20	8.54536e-19
Kdsr	694.588	-4.15791	0.921948	-4.50991	6.48538e-06	3.97142e-05
Misp	692.193	-26.4724	1.21852	-21.725	1.19089e-104	3.30884e-102
Isca1	688.574	-4.17792	0.811994	-5.14525	2.67158e-07	1.80524e-06
F11r	688.214	-10.613	1.00461	-10.5643	4.36143e-26	7.86545e-25
Neurl1b	684.942	-8.2695	1.51752	-5.44935	5.05536e-08	3.61731e-07
Pdzd11	683.46	-3.10523	0.793165	-3.91499	9.04089e-05	0.000497507
B930095G15Rik	683.115	-7.56782	0.752944	-10.051	9.09581e-24	1.48366e-22
Ndc1	682.553	-8.91032	1.35	-6.60022	4.10535e-11	3.6516e-10
Ndn	680.883	-12.6816	1.09548	-11.5763	5.43333e-31	1.16582e-29
Tapbp	674.81	-3.20454	0.844123	-3.7963	0.000146871	0.000785531
Itpr1	670.395	-5.14445	1.10183	-4.669	3.02663e-06	1.89662e-05
Jag1	669.394	-3.45355	0.88481	-3.90315	9.49482e-05	0.000521261
Matn1	669.248	-14.6102	2.04877	-7.1312	9.94952e-13	9.73166e-12
Il17re	667.18	-7.43274	1.60199	-4.63968	3.48949e-06	2.18167e-05
Hes1	664.26	-11.7721	0.992805	-11.8574	1.96887e-32	4.45797e-31
Jpt1	659.532	-9.75424	0.866893	-11.2519	2.26528e-29	4.55641e-28
Nfia	658.601	-2.5197	0.603741	-4.17348	2.9998e-05	0.00017285
Gna14	657.292	-29.7659	1.19984	-24.8083	7.29541e-136	7.03492e-133
Lad1	653.609	-29.5173	1.37181	-21.5171	1.07613e-102	2.714e-100
Parva	647.573	-12.8131	1.07716	-11.8952	1.25283e-32	2.86039e-31
Leprot	644.461	-3.49329	0.886932	-3.93863	8.19497e-05	0.000452171
Luzp2	643.888	-30.2067	1.69152	-17.8577	2.51754e-71	2.05323e-69
Prpf19	640.78	-2.52912	0.612456	-4.12948	3.63583e-05	0.000207891
Mertk	636.147	-6.94673	1.60231	-4.33544	1.45467e-05	8.61191e-05
Slc35f5	634.448	-4.10826	1.02118	-4.02304	5.74528e-05	0.000322211
Prss36	629.081	-6.12922	1.15819	-5.29207	1.20936e-07	8.39335e-07
Stard4	626.541	-5.59883	0.95655	-5.85315	4.82343e-09	3.68627e-08
Mark1	624.71	-11.9879	0.857286	-13.9836	1.9641e-44	6.63865e-43
Dip2b	622.423	-7.23052	0.740135	-9.76919	1.52663e-22	2.36318e-21
Sstr2	620.855	-24.9707	1.68034	-14.8605	5.95148e-50	2.45749e-48
Trim25	616.454	-5.79899	1.1068	-5.2394	1.61103e-07	1.10825e-06
Avpi1	614.159	-9.6125	1.39157	-6.90765	4.92736e-12	4.63686e-11
Pcgf5	610.01	-3.47522	0.91723	-3.78882	0.000151366	0.000807993
Insig1	607.506	-10.1379	0.757872	-13.3768	8.26275e-41	2.45239e-39
Fermt2	605.033	-13.3169	1.14776	-11.6025	4.0012e-31	8.63049e-30
Ppdpf	602.733	-4.78564	0.779721	-6.13763	8.37613e-10	6.81438e-09
Rab27b	597.31	-29.9087	1.5251	-19.611	1.24636e-85	1.57166e-83
Sdc1	596.795	-10.6636	1.35912	-7.84598	4.29586e-15	4.75182e-14
Cpne3	595.522	-3.61352	0.947486	-3.81379	0.000136851	0.000733857
Nudt3	592.208	-4.21722	0.648139	-6.50666	7.6838e-11	6.74307e-10
Elovl5	588.338	-11.7045	1.06762	-10.9632	5.7429e-28	1.10757e-26
Zfp36l1	586.304	-5.84303	1.22784	-4.75879	1.94758e-06	1.23555e-05
Fibin	585.304	-13.5855	1.00794	-13.4785	2.09308e-41	6.30733e-40
Gm16136	574.801	-29.8422	1.44165	-20.7	3.46253e-95	6.52429e-93
Ets2	570.36	-9.81131	1.27821	-7.6758	1.64384e-14	1.76705e-13
Ppp1r3c	569.72	-27.3047	1.40254	-19.4681	2.04733e-84	2.38027e-82
Slc44a1	564.333	-7.37002	1.22486	-6.01701	1.77665e-09	1.40563e-08
Abcd3	563.361	-4.63572	1.06813	-4.34002	1.42473e-05	8.44687e-05
Gca	563.192	-12.5171	0.852526	-14.6824	8.35863e-49	3.30176e-47
Pacsin3	561.471	-27.7985	1.49289	-18.6206	2.18942e-77	2.12374e-75
Gcat	560.759	-5.90046	0.930343	-6.34224	2.26449e-10	1.92341e-09
Kremen1	559.16	-12.7099	1.0396	-12.2257	2.26531e-34	5.4691e-33
Sin3b	559.122	-4.18855	0.806123	-5.19592	2.03706e-07	1.38792e-06
Hk2	557.686	-29.485	1.39032	-21.2073	8.16957e-100	2.02915e-97
Erg28	555.001	-4.32282	0.924739	-4.67464	2.9447e-06	1.84598e-05
Hbegf	551.967	-10.7855	1.64744	-6.54684	5.87665e-11	5.17379e-10
Atf3	546.462	-7.87373	1.87797	-4.19267	2.75687e-05	0.000159356
Farp1	543.14	-3.69505	0.851669	-4.3386	1.43392e-05	8.49828e-05
Plcd4	542.831	-8.0119	1.67373	-4.78686	1.69413e-06	1.07727e-05
Cops7b	542.102	-4.74511	1.22879	-3.8616	0.000112645	0.000610584
Hmgb2	541.807	-5.7113	1.03658	-5.50977	3.59304e-08	2.60277e-07
Rasgrp1	538.262	-29.7804	1.55865	-19.1065	2.22743e-81	2.31103e-79
Pnkd	537.817	-4.18262	0.896885	-4.66349	3.10887e-06	1.94667e-05
Lzic	535.676	-4.14757	0.940313	-4.41084	1.0297e-05	6.1899e-05
Hdc	535.324	-25.5722	2.04582	-12.4997	7.49434e-36	1.91362e-34
Echdc2	529.921	-12.7387	1.11498	-11.4251	3.13378e-30	6.51103e-29
Galnt1	529.873	-12.6975	0.953076	-13.3226	1.70942e-40	5.01297e-39
Pacs1	526.607	-11.2938	1.17005	-9.65243	4.80056e-22	7.22641e-21
Pls3	526.001	-13.8064	1.39947	-9.86543	5.87842e-23	9.27478e-22
Pole3	525.988	-4.94218	0.966672	-5.11257	3.17808e-07	2.13517e-06
Fmnl1	520.202	-23.991	1.31465	-18.249	2.10711e-74	1.90052e-72
Mapk11	517.597	-14.7065	1.42328	-10.3328	5.00547e-25	8.61014e-24
Herpud2	515.786	-3.70834	0.90945	-4.07756	4.55103e-05	0.000257614
Klc3	515.756	-3.16926	0.764397	-4.1461	3.3819e-05	0.000193869
Gm12715	514.541	-2.6298	0.364675	-7.21135	5.53994e-13	5.50735e-12
Zfp185	507.985	-30.305	1.43656	-21.0956	8.73332e-99	1.96117e-96
Septin9	505.927	-11.3734	0.772745	-14.7182	4.92426e-49	1.97851e-47
Epb41l4b	505.793	-10.9349	0.89024	-12.283	1.11711e-34	2.73326e-33
Rhpn2	504.427	-14.5973	1.36734	-10.6757	1.32242e-26	2.42487e-25
Slc2a1	503.024	-3.29535	0.791637	-4.1627	3.14509e-05	0.00018084
Bhlhe40	500.147	-28.5668	1.50154	-19.025	1.05788e-80	1.07048e-78
Perp	499.938	-28.3658	1.23297	-23.0061	4.05189e-117	1.70314e-114
Snap23	497.814	-5.401	1.12234	-4.81227	1.49223e-06	9.51463e-06
Phyh	495.946	-28.2677	1.10246	-25.6406	5.38174e-145	8.02026e-142
Fbxo30	490.207	-11.76	1.09673	-10.7228	7.95363e-27	1.46994e-25
Spin1	486.879	-3.64364	0.817894	-4.45491	8.39297e-06	5.08448e-05
Adgrl3	486.349	-8.55342	0.739224	-11.5708	5.79328e-31	1.24143e-29
Map3k1	485.102	-9.87409	0.895769	-11.023	2.95895e-28	5.76082e-27
Tgfa	482.526	-13.2214	1.34581	-9.82413	8.86344e-23	1.38379e-21
Prkar2b	479.301	-29.5895	1.33354	-22.1886	4.42222e-109	1.39411e-106
Smoc1	476.898	-40.7006	1.7074	-23.8377	1.35806e-125	6.74629e-123
Jkamp	476.035	-4.20752	0.954821	-4.40661	1.05003e-05	6.30748e-05
Dgkb	475.855	-11.5282	1.11286	-10.3591	3.80369e-25	6.5983e-24
Adgrg1	474.513	-23.2675	1.33889	-17.3782	1.20749e-67	8.66926e-66
Erbin	473.558	-12.313	0.844441	-14.5813	3.69416e-48	1.4249e-46
Eepd1	472.895	-7.5774	1.34207	-5.64605	1.64179e-08	1.21672e-07
St3gal6	471.021	-28.9427	1.30143	-22.2392	1.43491e-109	4.70449e-107
Gulp1	470.923	-29.1397	1.14764	-25.391	3.17345e-142	4.3352e-139
5031439G07Rik	470.807	-3.99381	0.902606	-4.42475	9.65525e-06	5.81478e-05
Sowaha	470.083	-23.7873	1.16657	-20.3908	2.01949e-92	3.28155e-90
Rasd1	469.151	-10.7106	1.45952	-7.33841	2.16142e-13	2.20349e-12
Irx3	468.532	-12.5072	1.31749	-9.49318	2.24083e-21	3.29452e-20
Exoc3	468.312	-5.35294	0.936419	-5.71639	1.0881e-08	8.1189e-08
Sfn	467.624	-9.94931	1.42083	-7.00247	2.51484e-12	2.40524e-11
Rtp4	467.433	-29.8307	2.56635	-11.6238	3.11895e-31	6.75414e-30
Tspan9	465.701	-26.2518	1.29017	-20.3476	4.87726e-92	7.68778e-90
Tfeb	459.768	-8.68276	0.90157	-9.63072	5.93143e-22	8.88792e-21
Lnpk	455.902	-5.40604	1.00491	-5.37961	7.46476e-08	5.27683e-07
Txndc12	454.5	-3.08411	0.798208	-3.86379	0.000111643	0.000606013
Irf9	454.474	-5.56324	1.35735	-4.09861	4.15632e-05	0.000236168
Dmtn	453.581	-28.4951	1.16798	-24.397	1.83907e-131	1.25616e-128
Anapc11	450.972	-2.99942	0.637584	-4.70435	2.54674e-06	1.60202e-05
Vcl	449.761	-3.46883	0.90988	-3.8124	0.000137621	0.000737745
Kcnh7	448.672	-25.7607	1.17401	-21.9425	1.02208e-106	2.99196e-104
Dennd1b	448.053	-12.1137	0.812153	-14.9155	2.61234e-50	1.08691e-48
Pinlyp	445.672	-30.0316	2.47179	-12.1497	5.75439e-34	1.36318e-32
Creb3l4	444.19	-29.6425	1.52621	-19.4223	4.99571e-84	5.68713e-82
Prex1	443.253	-4.52864	1.01414	-4.46549	7.98861e-06	4.8431e-05
Ptprk	442.901	-11.8216	0.8899	-13.2842	2.85909e-40	8.32489e-39
1810019D21Rik	442.032	-24.2082	1.24286	-19.4778	1.69395e-84	1.9855e-82
Otogl	441.172	-26.3819	1.58781	-16.6153	5.40097e-62	3.24315e-60
Tmcc1	437.693	-3.56199	0.724843	-4.91416	8.91655e-07	5.79116e-06
Slc31a2	436.641	-27.6346	1.44752	-19.0909	3.00281e-81	3.09592e-79
Zfp62	435.735	-26.6061	1.33348	-19.9523	1.43076e-88	2.02194e-86
Cnksr1	424.662	-7.87239	1.24003	-6.34855	2.17347e-10	1.84753e-09
Ccsap	420.121	-5.13849	0.963506	-5.33312	9.65412e-08	6.76036e-07
Ctsz	419.551	-7.41693	1.03925	-7.13682	9.55144e-13	9.37585e-12
Raph1	418.655	-4.59127	1.22879	-3.73642	0.00018666	0.000983895
Arap2	417.77	-26.6509	1.29209	-20.6262	1.59698e-94	2.94149e-92
Tmem159	417.274	-27.0672	1.06955	-25.3072	2.66467e-141	3.12014e-138
Stx11	413.456	-27.8588	1.39832	-19.923	2.56994e-88	3.54026e-86
Trim26	412.173	-11.6882	1.13328	-10.3136	6.11478e-25	1.04416e-23
Tmem170	410.81	-3.80027	0.941579	-4.03606	5.43554e-05	0.000305677
Ccdc69	408.766	-28.5827	1.36414	-20.9529	1.7644e-97	3.75633e-95
Cyb5r1	405.706	-27.2011	1.33399	-20.3907	2.02182e-92	3.28155e-90
Apbb2	404.736	-4.04648	0.910363	-4.44491	8.7928e-06	5.31491e-05
Rhoj	402.541	-29.6146	1.75663	-16.8588	9.04507e-64	5.8607e-62
Chst8	402.459	-25.9396	1.4242	-18.2135	4.03576e-74	3.59555e-72
Wee1	401.946	-20.3452	1.71628	-11.8543	2.04508e-32	4.62414e-31
Hgs	400.6	-5.52109	0.973946	-5.66878	1.43814e-08	1.0687e-07
Tlcd1	396.568	-26.6189	1.15658	-23.0152	3.28024e-117	1.41508e-114
Ndrg1	396.452	-27.1174	1.70163	-15.9361	3.56031e-57	1.87666e-55
Gpr37	395.484	-28.8938	1.53418	-18.8334	4.01758e-79	4.01586e-77
Psmd10	394.616	-6.36189	1.06051	-5.99888	1.98679e-09	1.56433e-08
Elf1	394.056	-7.17951	0.817703	-8.78009	1.63339e-18	2.1507e-17
Egr2	392.37	-27.4359	1.54517	-17.7559	1.55034e-70	1.2449e-68
Gstk1	392.073	-12.3712	1.10272	-11.2188	3.29865e-29	6.56247e-28
Irx5	390.849	-11.952	1.00062	-11.9446	6.92963e-33	1.59547e-31
Slitrk6	390.776	-11.8388	1.30632	-9.06269	1.27268e-19	1.74295e-18
Hivep2	389.705	-6.5775	0.976504	-6.73576	1.63077e-11	1.48353e-10
Rras	389.513	-5.25263	1.36454	-3.84937	0.000118421	0.00064005
Ntn4	388.95	-30.0076	1.52192	-19.7169	1.54467e-86	1.99384e-84
Anxa9	386.807	-7.95561	1.59773	-4.97931	6.3811e-07	4.17753e-06
Ldlr	384.009	-5.79656	1.40723	-4.11912	3.80319e-05	0.00021693
Dennd2d	382.243	-29.5436	1.48614	-19.8794	6.13439e-88	8.24271e-86
Fam220a	381.864	-3.00537	0.757962	-3.96506	7.3376e-05	0.00040747
Cobll1	380.46	-28.8953	1.15423	-25.0343	2.59081e-138	2.83141e-135
Slc39a8	377.785	-10.3788	1.20324	-8.62566	6.37222e-18	8.10394e-17
Esrp1	377.025	-10.8922	1.03072	-10.5675	4.21379e-26	7.61595e-25
Cd151	375.598	-4.66248	0.896544	-5.20051	1.98747e-07	1.35583e-06
Fam102a	373.998	-3.87885	0.973443	-3.98467	6.75745e-05	0.000376785
Tbc1d8	373.235	-6.59022	1.04277	-6.31989	2.61753e-10	2.20386e-09
Plp2	371.11	-27.7319	1.43842	-19.2794	7.99616e-83	8.79739e-81
Tmem129	369.098	-27.6557	1.25799	-21.984	4.0995e-107	1.22187e-104
Bmp6	368.871	-25.2348	1.39945	-18.032	1.09356e-72	9.28843e-71
Cblc	368.707	-10.9592	1.28806	-8.50828	1.76527e-17	2.20397e-16
Plekha1	368.47	-11.1758	1.11149	-10.0548	8.7465e-24	1.42953e-22
Hey1	366.064	-24.0002	1.67518	-14.3269	1.48508e-46	5.398e-45
Cntnap2	365.919	-27.5029	1.49053	-18.4518	5.04476e-76	4.72564e-74
Slc25a30	364.711	-5.32969	1.37182	-3.88512	0.000102278	0.00055758
Ank2	362.419	-13.4869	1.31137	-10.2846	8.26948e-25	1.40333e-23
Ireb2	361.753	-5.15141	1.17121	-4.39836	1.09071e-05	6.53273e-05
Cpxm2	359.151	-24.9958	1.97566	-12.6519	1.09203e-36	2.84154e-35
1700001L19Rik	357.654	-5.05934	1.12456	-4.49895	6.82884e-06	4.16773e-05
Snx9	355.347	-11.1043	1.07196	-10.3588	3.81523e-25	6.61132e-24
Shc4	354.221	-7.02435	1.35451	-5.18588	2.14993e-07	1.4624e-06
Rapgef6	352.384	-3.96224	0.903193	-4.38693	1.14964e-05	6.8781e-05
Aldoc	350.877	-14.1136	1.40903	-10.0165	1.28968e-23	2.08499e-22
Cyp2j12	349.263	-25.3203	1.42446	-17.7754	1.09707e-70	8.85929e-69
Tpd52l1	347.675	-24.9479	1.34691	-18.5224	1.36279e-76	1.30645e-74
Boc	347.349	-10.8428	1.35587	-7.99693	1.27561e-15	1.45519e-14
Wwtr1	347.226	-11.3105	1.20691	-9.37142	7.15646e-21	1.02999e-19
Plekha6	346.457	-26.7965	1.47621	-18.1522	1.23384e-73	1.08162e-71
Fam174b	346.017	-28.5935	1.81018	-15.7959	3.31831e-56	1.68935e-54
Man2c1	344.188	-4.82358	1.02076	-4.72547	2.29582e-06	1.4503e-05
Prom2	343.973	-28.4266	1.43948	-19.7478	8.3737e-87	1.09816e-84
Blmh	342.107	-8.63492	1.14958	-7.51136	5.85143e-14	6.13315e-13
Ece1	341.942	-7.76304	1.07084	-7.24949	4.1833e-13	4.18918e-12
Mcm2	341.568	-24.6315	1.55184	-15.8725	9.82563e-57	5.11338e-55
Palm	341.447	-12.1842	1.46179	-8.33514	7.74044e-17	9.37835e-16
Stxbp6	340.443	-28.2128	1.46934	-19.201	3.62814e-82	3.93881e-80
Sacs	338.139	-25.8967	1.53462	-16.875	6.87229e-64	4.47054e-62
Grhl1	337.176	-9.32331	1.40164	-6.65171	2.89708e-11	2.59661e-10
Cldn6	336.871	-10.4218	1.76482	-5.90529	3.52033e-09	2.71955e-08
Dclk3	335.904	-34.2611	1.54973	-22.1077	2.66405e-108	8.23995e-106
Gpt2	335.679	-27.1407	1.46077	-18.5798	4.68592e-77	4.5186e-75
Adgrl2	335.445	-26.8645	1.32114	-20.3343	6.39536e-92	9.98468e-90
Tmem189	335.167	-27.586	1.35437	-20.3682	3.2004e-92	5.14354e-90
Acadl	333.424	-27.3016	1.55187	-17.5927	2.80403e-69	2.14796e-67
Eva1a	333.292	-28.4403	1.60256	-17.7468	1.82317e-70	1.45083e-68
Arl6	332.98	-8.7095	1.20778	-7.21117	5.54714e-13	5.51117e-12
Ppp2r2b	329.955	-29.3036	1.76789	-16.5754	1.04963e-61	6.23426e-60
Stimate	328.169	-27.4529	1.33345	-20.5878	3.52853e-94	6.42703e-92
Shc2	327.942	-27.3944	1.30669	-20.9647	1.37744e-97	2.97109e-95
C2cd4b	327.834	-9.81277	1.14427	-8.57554	9.8621e-18	1.24457e-16
Cadm1	326.856	-25.5777	1.55369	-16.4626	6.80836e-61	3.95778e-59
Kcnb2	326.164	-25.0248	1.64712	-15.193	3.93265e-52	1.77598e-50
Egfr	325.959	-26.9622	1.3744	-19.6173	1.09963e-85	1.39739e-83
Tectb	324.242	-12.4419	2.42482	-5.13106	2.88114e-07	1.94125e-06
Fam234a	322.263	-8.05773	1.32922	-6.062	1.3444e-09	1.07244e-08
Rasa4	322.018	-24.9602	1.83243	-13.6214	2.98983e-42	9.30024e-41
Nckap5	321.156	-12.087	1.26923	-9.5231	1.68083e-21	2.48906e-20
Snx7	319.595	-25.9477	1.18726	-21.8551	6.95609e-106	2.00055e-103
Slc2a10	318.449	-28.0025	1.72346	-16.2478	2.31438e-59	1.29487e-57
Mxra8	317.44	-25.5903	1.73258	-14.7701	2.28441e-49	9.26939e-48
Galk2	316.683	-24.2469	1.36558	-17.7557	1.55679e-70	1.2449e-68
Amer2	316.236	-12.913	1.49413	-8.64252	5.49867e-18	7.00386e-17
Clip1	315.986	-6.81499	1.25683	-5.42235	5.88196e-08	4.19412e-07
Grk3	312.225	-6.4086	1.28495	-4.98744	6.11841e-07	4.00875e-06
Nedd9	312.151	-11.8464	1.18633	-9.98578	1.75909e-23	2.82713e-22
Tapbpl	311.2	-11.9236	1.21205	-9.83755	7.75762e-23	1.21694e-21
Memo1	311.007	-5.83862	1.16905	-4.99433	5.9041e-07	3.86989e-06
Mbnl1	309.281	-3.99604	0.996768	-4.009	6.09763e-05	0.000340806
Gm47163	309.167	-23.3214	1.58723	-14.6932	7.12719e-49	2.82896e-47
Tmem43	308.709	-25.6525	1.60247	-16.0081	1.12169e-57	5.95076e-56
Car11	308.577	-13.5594	1.28708	-10.535	5.95713e-26	1.06961e-24
Itih5	305.519	-28.3258	1.68416	-16.8189	1.77407e-63	1.13161e-61
Sox10	302.314	-28.8075	1.63581	-17.6106	2.04437e-69	1.58082e-67
Tmem252	302.038	-28.6271	1.37665	-20.7948	4.82621e-96	9.30777e-94
Map4k5	300.76	-5.69005	0.986437	-5.76828	8.00849e-09	6.01113e-08
Gprc5c	299.436	-11.996	1.09298	-10.9755	5.01003e-28	9.68508e-27
Dapk1	298.122	-27.8813	1.45262	-19.1938	4.1708e-82	4.49815e-80
Hpn	297.749	-24.7595	1.62834	-15.2054	3.25561e-52	1.47837e-50
Rnf130	297.739	-4.65973	1.04609	-4.45444	8.41116e-06	5.09362e-05
Fam222b	296.7	-8.87544	0.887802	-9.99709	1.56948e-23	2.52487e-22
Etv5	293.541	-13.0988	1.56106	-8.39098	4.82089e-17	5.89768e-16
Rbms1	290.182	-8.43164	1.04174	-8.09384	5.78118e-16	6.73567e-15
Marveld3	289.954	-7.2385	1.30535	-5.54524	2.93558e-08	2.14165e-07
F12	289.228	-29.2327	1.50082	-19.4778	1.69566e-84	1.9855e-82
Phlda1	288.18	-5.91368	0.776957	-7.61134	2.71277e-14	2.89521e-13
Rab13	287.916	-6.9973	1.36082	-5.14198	2.71861e-07	1.83551e-06
Prag1	287.591	-14.7411	1.42509	-10.344	4.45563e-25	7.68046e-24
Resf1	287.342	-7.14297	0.923017	-7.73872	1.0042e-14	1.08803e-13
F3	287.209	-51.2342	1.99413	-25.6925	1.41669e-145	2.32238e-142
Zswim7	285.074	-4.7833	0.817532	-5.8509	4.88908e-09	3.73296e-08
Trak2	284.993	-9.07272	1.19862	-7.56932	3.75178e-14	3.95771e-13
Dhrs11	284.502	-26.364	1.25119	-21.0711	1.46553e-98	3.24655e-96
Itga6	284.245	-14.6182	2.34711	-6.22819	4.71844e-10	3.88885e-09
Traf4	284.115	-24.756	1.43891	-17.2046	2.45248e-66	1.71078e-64
Ubxn11	283.791	-25.2502	1.55299	-16.2591	1.92536e-59	1.08091e-57
Nup62	283.531	-25.1927	1.2638	-19.9342	2.05728e-88	2.85805e-86
Pik3r3	283.232	-6.6853	1.10109	-6.07152	1.26706e-09	1.01223e-08
Tmem51	282.311	-10.824	1.30614	-8.28702	1.16123e-16	1.39153e-15
Adcy2	280.564	-11.3412	1.22503	-9.25794	2.08421e-20	2.94792e-19
Gosr1	280.378	-4.28501	0.984354	-4.35312	1.34214e-05	7.97162e-05
Exoc6b	279.201	-5.48165	1.39284	-3.93559	8.29928e-05	0.000457619
Ppp2r5a	278.782	-4.75963	1.15743	-4.11223	3.91856e-05	0.000223278
Elovl7	277.88	-28.023	1.54657	-18.1195	2.23615e-73	1.93953e-71
Ebf3	277.856	-9.50521	0.948082	-10.0257	1.17497e-23	1.90328e-22
Sall2	277.21	-26.6351	1.72251	-15.463	6.16544e-54	2.91268e-52
Metrnl	277.163	-25.9795	2.25093	-11.5416	8.13574e-31	1.72758e-29
Pvr	276.082	-25.8813	1.53763	-16.8319	1.42357e-63	9.11584e-62
Irf2bpl	274.01	-6.93226	1.36188	-5.09022	3.57655e-07	2.3921e-06
Lmcd1	272.869	-24.8183	1.54217	-16.0931	2.85418e-58	1.57008e-56
Amot	271.013	-13.4149	1.32646	-10.1133	4.82117e-24	7.94306e-23
Marcks	269.374	-19.8704	2.03695	-9.75495	1.75693e-22	2.70945e-21
BC064078	269.15	-27.9206	1.54384	-18.0852	4.16928e-73	3.57838e-71
Nxt2	267.318	-9.12219	1.32066	-6.9073	4.93963e-12	4.64574e-11
Lpar3	265.504	-29.1467	1.49608	-19.482	1.55962e-84	1.86619e-82
BC006965	265.312	-28.8237	1.66705	-17.2902	5.57411e-67	3.95569e-65
Sgpl1	265.08	-25.4827	1.78226	-14.298	2.25195e-46	8.11344e-45
Rhbdl2	264.462	-27.4904	1.64991	-16.6618	2.48453e-62	1.52543e-60
Tprn	263.931	-6.87314	1.41127	-4.87019	1.1149e-06	7.18418e-06
S100a11	261.703	-10.0823	1.66723	-6.04736	1.47235e-09	1.17166e-08
Creb5	260.52	-26.1715	1.71107	-15.2954	8.208e-53	3.80095e-51
Bche	260.515	-27.7421	1.66108	-16.7013	1.28301e-62	8.02764e-61
Dsg2	260.37	-12.1527	1.47261	-8.25249	1.55132e-16	1.85086e-15
Akr1cl	258.963	-28.3953	1.40082	-20.2705	2.34165e-91	3.55432e-89
Ephb1	258.947	-28.5908	1.783	-16.0352	7.25882e-58	3.88869e-56
Vangl1	258.867	-26.7617	1.55341	-17.2278	1.64411e-66	1.15674e-64
Clmn	258.515	-26.1292	1.96652	-13.287	2.75386e-40	8.03274e-39
Mapkapk3	256.968	-24.7606	1.62458	-15.2412	1.88328e-52	8.64781e-51
Rgs6	255.466	-11.564	1.19284	-9.69451	3.18171e-22	4.8564e-21
Mmp14	254.309	-12.7328	1.72734	-7.37131	1.68953e-13	1.7332e-12
Aox2	253.634	-29.3923	1.47594	-19.9142	3.06337e-88	4.18482e-86
F730043M19Rik	253.579	-21.337	1.69196	-12.6109	1.83997e-36	4.7575e-35
Mmp15	251.882	-5.32291	1.38083	-3.85485	0.000115799	0.000626707
Bcl7c	250.961	-4.15345	0.965393	-4.30234	1.69e-05	9.94765e-05
Tuba1c	250.536	-3.81688	0.47159	-8.09364	5.7907e-16	6.74197e-15
Mtap	249.585	-27.911	1.53019	-18.2402	2.47335e-74	2.21561e-72
Lpp	249.573	-6.2347	1.28376	-4.85661	1.19414e-06	7.67668e-06
Crybg3	249.145	-5.16041	1.37176	-3.76188	0.00016864	0.000894086
Utp14b	249.092	-10.3162	1.12007	-9.21028	3.25266e-20	4.53794e-19
Extl1	248.78	-12.5189	1.21945	-10.266	1.00259e-24	1.69612e-23
Mgat2	248.236	-26.9031	1.37961	-19.5006	1.08587e-84	1.30888e-82
Pmepa1	248.095	-9.70399	1.19722	-8.1054	5.25703e-16	6.13807e-15
Arid5a	247.42	-11.1238	1.41374	-7.86838	3.59265e-15	4.00097e-14
Cib3	247.069	-20.934	2.00229	-10.455	1.39e-25	2.46072e-24
Fut2	246.715	-28.7778	1.63856	-17.5628	4.74832e-69	3.58706e-67
Cd99l2	246.234	-4.73322	1.18522	-3.99353	6.50955e-05	0.000363334
Tmprss2	245.654	-29.4623	1.5071	-19.549	4.20735e-85	5.14709e-83
Bcl3	245.458	-22.9037	2.07131	-11.0576	2.01493e-28	3.93692e-27
Rgs2	244.842	-28.3093	1.66223	-17.0309	4.84648e-65	3.24279e-63
Trib1	244.089	-25.891	1.35006	-19.1777	5.67908e-82	6.08478e-80
Gm11223	243.072	-7.30697	0.879853	-8.30476	1.00023e-16	1.20123e-15
Tes	242.927	-28.433	1.45061	-19.6007	1.52487e-85	1.89373e-83
Shroom1	242.848	-28.0216	1.6022	-17.4895	1.72288e-68	1.28964e-66
B4galnt1	242.031	-39.5161	1.36572	-28.9342	4.43921e-184	7.2772e-180
Apod	241.49	-28.8633	1.83808	-15.703	1.44354e-55	7.17091e-54
Gm19345	240.74	-12.4304	1.32597	-9.37457	6.94576e-21	1.00231e-19
Vim	240.19	-8.46934	2.06513	-4.10111	4.11164e-05	0.000233873
Nupr1	238.322	-10.7187	1.74882	-6.12911	8.83743e-10	7.16833e-09
Ulk1	236.356	-11.0119	1.18968	-9.25618	2.11887e-20	2.99436e-19
Smim5	235.505	-23.899	1.53894	-15.5295	2.19002e-54	1.04667e-52
Mavs	235.278	-9.45391	1.47875	-6.39318	1.62473e-10	1.39227e-09
Agfg2	234.872	-10.0381	0.991037	-10.1289	4.11452e-24	6.80619e-23
Crim1	234.8	-9.96269	1.0321	-9.65282	4.78218e-22	7.20535e-21
Gfod2	234.308	-7.60527	1.23235	-6.17138	6.76984e-10	5.53506e-09
Rusc2	233.812	-11.874	1.29774	-9.14975	5.70629e-20	7.88729e-19
Zfp467	233.41	-26.7573	1.67021	-16.0204	9.21232e-58	4.90317e-56
Mex3c	232.521	-6.22511	1.60843	-3.87031	0.000108697	0.000591396
Vstm4	231.974	-28.7187	2.37872	-12.0732	1.4635e-33	3.44207e-32
Dhrs3	231.868	-28.5333	1.90152	-15.0055	6.7547e-51	2.89112e-49
Sh3bp5	231.709	-11.0436	1.40566	-7.85653	3.94924e-15	4.3832e-14
Rasef	231.3	-11.8333	1.35645	-8.72376	2.6911e-18	3.50121e-17
Cavin3	230.974	-27.3972	1.55798	-17.5851	3.20341e-69	2.44249e-67
Cyp2j6	229.834	-28.4746	1.61326	-17.6504	1.01066e-69	7.85201e-68
Bzw2	229.828	-10.0642	1.17954	-8.53232	1.43441e-17	1.79636e-16
Jpt2	227.784	-25.1706	1.52891	-16.4631	6.75737e-61	3.94212e-59
Kif1a	227.101	-14.7151	1.53074	-9.61308	7.04138e-22	1.05319e-20
Sox2	226.094	-10.6595	1.17221	-9.09353	9.58704e-20	1.31625e-18
Sppl2a	224.967	-27.7076	1.33967	-20.6824	4.98875e-95	9.29324e-93
Pitpnc1	224.377	-28.4689	1.34376	-21.186	1.28489e-99	3.09753e-97
Plod2	224.263	-27.0213	1.42862	-18.9142	8.71285e-80	8.76256e-78
Bcl6	223.781	-27.9321	1.55131	-18.0055	1.76466e-72	1.48349e-70
Mir99ahg	222.345	-11.4637	1.07731	-10.641	1.92028e-26	3.49769e-25
Ezh2	221.942	-7.10583	1.43731	-4.94385	7.65935e-07	4.99045e-06
Atat1	221.938	-3.75114	0.973761	-3.85222	0.000117053	0.000632865
Tnnt1	220.954	-12.3501	1.51394	-8.15763	3.41675e-16	4.018e-15
Msl3	219.57	-6.35681	1.31069	-4.84996	1.23486e-06	7.91983e-06
Sqor	219.097	-25.9193	1.76318	-14.7003	6.41702e-49	2.55947e-47
Dyrk3	217.301	-9.89998	1.64302	-6.02548	1.68605e-09	1.33459e-08
Itgb8	216.956	-20.6555	1.56991	-13.1571	1.54917e-39	4.42431e-38
Cemip	215.389	-11.8147	1.34239	-8.80122	1.35331e-18	1.79054e-17
Alg13	215.181	-26.9586	1.66798	-16.1624	9.28789e-59	5.16123e-57
Ppl	215.092	-7.57982	1.39659	-5.42739	5.7183e-08	4.08454e-07
Pik3ap1	214.997	-27.2868	1.5961	-17.096	1.59067e-65	1.07752e-63
Abhd17c	214.952	-26.4698	1.50458	-17.5928	2.79847e-69	2.14796e-67
Sapcd2	214.943	-27.6264	2.1158	-13.0572	5.77926e-39	1.61396e-37
Agpat4	214.713	-7.29517	1.90855	-3.82237	0.000132174	0.000709936
Ppp4r1l-ps	214.558	-5.87145	1.1887	-4.93938	7.8371e-07	5.10221e-06
Ogfr	214.15	-27.1659	1.51283	-17.957	4.23169e-72	3.50354e-70
Septin8	212.666	-6.28552	1.26956	-4.95094	7.38576e-07	4.82177e-06
Pof1b	212.248	-27.7935	1.7962	-15.4735	5.23656e-54	2.48101e-52
Arhgef38	211.514	-27.8328	1.61925	-17.1887	3.227e-66	2.24153e-64
Klhl32	211.503	-7.75797	1.55269	-4.99646	5.83931e-07	3.83202e-06
Sowahb	210.833	-25.6023	1.48585	-17.2308	1.56028e-66	1.10249e-64
Fam83g	210.006	-12.5192	1.31793	-9.49913	2.11644e-21	3.12004e-20
4930578M01Rik	209.481	-8.93477	1.49811	-5.96402	2.46099e-09	1.92476e-08
4930452B06Rik	208.745	-26.7535	1.61131	-16.6036	6.56215e-62	3.92603e-60
Fbn2	207.405	-21.517	1.91614	-11.2293	2.92636e-29	5.84725e-28
Git1	207.343	-8.66477	1.64943	-5.25318	1.49496e-07	1.03143e-06
Parp3	206.907	-11.9377	1.92447	-6.2031	5.53602e-10	4.5376e-09
Fscn1	206.548	-11.4745	1.26122	-9.09793	9.20663e-20	1.26508e-18
Tmem186	206.381	-27.2652	1.40449	-19.4128	6.01113e-84	6.74934e-82
Dmd	206.363	-26.7951	1.40394	-19.0857	3.32264e-81	3.40426e-79
Gm14325	205.982	-4.49435	1.11	-4.04895	5.1447e-05	0.000289818
Rpl22l1	204.522	-2.52028	0.563846	-4.4698	7.82927e-06	4.75177e-05
Aebp1	204.517	-11.2348	2.20066	-5.1052	3.30442e-07	2.21551e-06
Gm49329	204.176	-11.8094	1.12877	-10.4621	1.2891e-25	2.28703e-24
Baiap2	203.127	-6.41097	1.41887	-4.51837	6.23174e-06	3.82181e-05
Gm8730	202.937	-8.33062	0.739828	-11.2602	2.06266e-29	4.16419e-28
Klf4	202.157	-25.1311	1.46597	-17.143	7.09405e-66	4.8658e-64
Rsl24d1	201.211	-4.06465	0.975898	-4.16503	3.11306e-05	0.00017925
Vegfa	201.046	-24.242	1.57152	-15.4259	1.09678e-53	5.16652e-52
Mettl27	200.896	-26.2722	1.76426	-14.8914	3.75024e-50	1.5564e-48
Tulp3	199.669	-13.6902	1.25368	-10.92	9.2493e-28	1.76924e-26
Nsmce3	199.563	-26.1271	1.18221	-22.1003	3.13801e-108	9.52618e-106
Scarb1	199.502	-8.79262	1.45511	-6.04258	1.51672e-09	1.20521e-08
Zfp931	198.993	-27.5063	1.51677	-18.1347	1.69489e-73	1.47789e-71
Cyp39a1	197.666	-11.2601	1.39038	-8.09863	5.55825e-16	6.48054e-15
Tcf12	197.527	-5.3943	1.1869	-4.54485	5.49742e-06	3.39176e-05
Cdk6	196.933	-28.2548	1.6232	-17.4068	7.3266e-68	5.29097e-66
Zfp395	196.47	-7.35819	1.02194	-7.20025	6.01043e-13	5.96062e-12
Foxp4	196.007	-8.61448	1.13184	-7.61105	2.71869e-14	2.89964e-13
Prox1	195.73	-11.9866	1.42402	-8.41747	3.84701e-17	4.7381e-16
Cdo1	194.586	-25.9828	2.03133	-12.791	1.83983e-37	4.88821e-36
Fam114a1	194.355	-27.9265	1.77176	-15.762	5.68361e-56	2.85802e-54
Acot9	193.713	-26.7312	1.80769	-14.7874	1.7656e-49	7.19988e-48
Trip6	193.659	-25.6294	1.96288	-13.057	5.79544e-39	1.61573e-37
Casp8	193.639	-26.0068	1.32381	-19.6454	6.32589e-86	8.10159e-84
Lpcat1	193.299	-9.13629	1.25675	-7.26978	3.60086e-13	3.61254e-12
Myc	193.203	-22.9482	2.02579	-11.328	9.53513e-30	1.94657e-28
Fkbp5	192.994	-28.0738	1.79775	-15.6161	5.65818e-55	2.74422e-53
Capn5	191.662	-25.1589	2.33025	-10.7967	3.56991e-27	6.68055e-26
Zfp874a	191.542	-27.098	1.76289	-15.3714	2.54667e-53	1.19621e-51
Rab20	191.522	-24.4599	2.96256	-8.25636	1.50187e-16	1.79316e-15
Stox2	191.157	-24.3349	1.3536	-17.9779	2.90226e-72	2.41506e-70
Clic4	191.025	-6.158	1.26854	-4.85439	1.20758e-06	7.76002e-06
Emx2os	190.764	-23.8419	1.58361	-15.0554	3.18002e-51	1.3791e-49
Tmem37	190.182	-23.4714	2.18675	-10.7335	7.08832e-27	1.31298e-25
Pacc1	189.966	-25.5129	1.68626	-15.1299	1.0289e-51	4.58336e-50
Zfp40	189.715	-26.2585	2.13122	-12.3209	6.99332e-35	1.71876e-33
Scnn1b	189.573	-18.3458	1.93151	-9.49818	2.13597e-21	3.14599e-20
Rint1	189.368	-5.58119	1.21274	-4.60212	4.18211e-06	2.59982e-05
Sox6	188.075	-5.32759	1.31589	-4.04868	5.15084e-05	0.000290064
Ctso	187.399	-27.3903	1.92731	-14.2116	7.76066e-46	2.72421e-44
Eva1c	186.135	-9.6352	1.44956	-6.64697	2.9918e-11	2.67857e-10
Pdgfd	185.985	-28.2804	2.17355	-13.0112	1.0568e-38	2.91652e-37
Pnpla7	184.781	-11.4237	1.70142	-6.7142	1.89098e-11	1.71264e-10
Rgmb	184.779	-9.19626	1.22772	-7.49051	6.86081e-14	7.16822e-13
Wnt7a	184.227	-28.2119	1.97525	-14.2827	2.8059e-46	1.0043e-44
Rap1gap2	183.332	-5.95169	1.19101	-4.9972	5.81689e-07	3.81884e-06
Lonrf3	182.872	-28.694	2.11357	-13.5761	5.55301e-42	1.70469e-40
Epb41l1	182.384	-27.5697	1.7521	-15.7353	8.67111e-56	4.3337e-54
Ipo4	182.286	-5.11416	1.17738	-4.34369	1.40106e-05	8.30955e-05
D11Wsu47e	182.047	-26.457	1.32265	-20.0031	5.17535e-89	7.37734e-87
Mb21d2	181.961	-5.58026	1.40744	-3.96482	7.34509e-05	0.000407748
Plin2	181.376	-27.0661	2.18518	-12.3863	3.1021e-35	7.72839e-34
Ap5s1	181.183	-6.54855	1.33515	-4.90473	9.35574e-07	6.0644e-06
Wnt7b	180.744	-9.44846	2.00245	-4.71844	2.37658e-06	1.49901e-05
Chrng	180.548	-23.0869	2.09004	-11.0462	2.28786e-28	4.45956e-27
S1pr1	180.079	-25.9309	2.30607	-11.2446	2.46155e-29	4.93303e-28
AW146154	179.382	-25.9619	1.67026	-15.5437	1.75628e-54	8.44303e-53
Cdc42ep1	179.172	-27.7339	1.94689	-14.2452	4.79997e-46	1.69582e-44
Ctnnd1	179.022	-6.63337	0.978601	-6.77842	1.21497e-11	1.11768e-10
Rcan2	178.644	-28.3171	2.21569	-12.7803	2.11364e-37	5.60662e-36
Etv3	178.599	-6.07803	1.23408	-4.92513	8.43045e-07	5.48196e-06
Gm2606	178.575	-2.02602	0.347254	-5.83441	5.39816e-09	4.10827e-08
Hsd11b2	177.726	-21.8227	2.10502	-10.367	3.50519e-25	6.09338e-24
Lfng	177.569	-9.01164	1.2263	-7.34863	2.00243e-13	2.04395e-12
Afap1l2	177.319	-12.0676	1.63835	-7.36571	1.76212e-13	1.80653e-12
Gipr	176.527	-14.5463	2.15598	-6.74696	1.50972e-11	1.37723e-10
Dhcr7	176.377	-9.15761	1.14866	-7.97246	1.55542e-15	1.76091e-14
Gm20559	175.219	-22.3087	2.12077	-10.5191	7.0512e-26	1.26466e-24
Ifngr1	175.102	-25.9672	1.94122	-13.3767	8.27289e-41	2.45239e-39
Hexb	174.811	-9.13544	1.46396	-6.24024	4.36899e-10	3.60992e-09
Iffo2	173.966	-7.44903	1.16472	-6.39556	1.59961e-10	1.3729e-09
Ndst1	173.21	-25.3799	1.16496	-21.7861	3.14e-105	8.87484e-103
Prpsap2	172.011	-6.39192	1.24187	-5.14703	2.64641e-07	1.78897e-06
Arhgef5	171.882	-27.7796	1.59507	-17.416	6.243e-68	4.52839e-66
Dpyd	171.238	-27.2009	2.27459	-11.9586	5.85252e-33	1.35127e-31
Fndc3b	170.478	-11.2888	1.79876	-6.27588	3.47668e-10	2.90486e-09
Mipol1	170.196	-9.37621	1.50291	-6.23871	4.41195e-10	3.64358e-09
Spry1	170.122	-27.3999	1.92757	-14.2147	7.42597e-46	2.61232e-44
Timm21	170.052	-27.0181	1.8498	-14.606	2.5721e-48	1.00153e-46
Plcl2	169.621	-23.3558	1.49775	-15.5939	8.0075e-55	3.87218e-53
Scube2	168.125	-11.7856	1.37489	-8.57197	1.01729e-17	1.2828e-16
Pdzk1ip1	166.758	-11.886	2.1411	-5.55135	2.8348e-08	2.07089e-07
Abhd11	166.403	-4.0801	1.07649	-3.79021	0.00015052	0.000803736
Bcl2l14	166.247	-26.6735	2.58561	-10.3161	5.95856e-25	1.01961e-23
Oxa1l	166.025	-5.69207	1.26504	-4.49951	6.811e-06	4.15839e-05
Pam	165.925	-26.8061	1.23661	-21.6771	3.37265e-104	8.91738e-102
Emid1	165.171	-9.49831	2.22872	-4.26179	2.028e-05	0.000118521
Cpm	164.337	-14.828	2.35938	-6.2847	3.2849e-10	2.74882e-09
Dclk2	162.257	-24.775	1.56402	-15.8406	1.63218e-56	8.41395e-55
Rab3c	161.567	-11.0387	1.7609	-6.26879	3.63859e-10	3.03549e-09
Mid2	161.421	-25.8181	1.72983	-14.9253	2.25728e-50	9.41567e-49
L3mbtl3	161.171	-24.8983	1.71253	-14.5389	6.87062e-48	2.63771e-46
Kif1c	161.108	-9.98392	1.15134	-8.67154	4.26311e-18	5.48144e-17
Zfp2	160.908	-25.4001	1.62316	-15.6486	3.39805e-55	1.66282e-53
Efna3	160.837	-7.94778	1.73395	-4.58363	4.56971e-06	2.83326e-05
Scara3	160.395	-42.0539	2.19874	-19.1263	1.52436e-81	1.60184e-79
Col4a5	160.094	-11.3888	1.70582	-6.67644	2.44818e-11	2.2039e-10
Trim29	157.816	-13.217	1.73166	-7.6326	2.3007e-14	2.46184e-13
Atl1	156.486	-7.72083	1.64165	-4.70309	2.5625e-06	1.61132e-05
Cwc22	156.012	-26.4164	1.51236	-17.4671	2.55247e-68	1.90194e-66
Ctbs	155.475	-11.1908	1.49545	-7.48324	7.25135e-14	7.55699e-13
Ccnjl	155.183	-19.9784	1.79961	-11.1015	1.2333e-28	2.42126e-27
Spice1	154.423	-8.13922	1.92918	-4.21901	2.45375e-05	0.000142286
Mpc1-ps	153.849	-3.50611	0.504654	-6.94756	3.71655e-12	3.51763e-11
Macc1	153.38	-25.7976	1.7379	-14.8441	7.59696e-50	3.12123e-48
Rdh11	152.74	-11.0033	1.70626	-6.4488	1.1274e-10	9.77336e-10
Zfp945	152.144	-25.4907	1.66267	-15.3312	4.73311e-53	2.20426e-51
Arhgef6	152.121	-41.6862	1.71512	-24.3051	1.73174e-130	1.01387e-127
Socs3	152.05	-27.5318	1.83579	-14.9973	7.6459e-51	3.26404e-49
Lyrm1	151.7	-25.8791	1.48919	-17.378	1.21104e-67	8.66926e-66
Trpm6	151.633	-36.3052	1.98618	-18.2789	1.21913e-74	1.11649e-72
Adssl1	151.168	-26.6608	1.98071	-13.4602	2.68155e-41	8.05103e-40
Traf3ip2	150.985	-25.1195	1.20407	-20.8622	1.18156e-96	2.39128e-94
Kifc3	150.817	-26.0334	1.86989	-13.9224	4.62973e-44	1.53946e-42
Natd1	150.737	-6.09661	1.62954	-3.7413	0.000183071	0.00096622
Yap1	150.704	-27.0662	1.29802	-20.8519	1.46639e-96	2.93152e-94
Alcam	150.367	-11.6884	2.68416	-4.35457	1.33326e-05	7.92465e-05
Cracr2b	150.148	-9.15129	1.54174	-5.93571	2.92579e-09	2.2731e-08
Zfp948	150.123	-25.4369	1.96386	-12.9525	2.27488e-38	6.21535e-37
Pex5	149.946	-8.9321	1.41148	-6.3282	2.48039e-10	2.09701e-09
Sema3f	149.443	-18.8792	1.92191	-9.82318	8.94748e-23	1.39559e-21
Dclre1c	148.215	-9.26858	1.57988	-5.86665	4.44696e-09	3.40968e-08
Mgat4a	147.879	-26.7772	1.80286	-14.8526	6.69018e-50	2.75558e-48
Nectin4	147.662	-25.6889	2.0452	-12.5606	3.47751e-36	8.94926e-35
Zfp959	147.223	-11.3727	2.08111	-5.46476	4.63534e-08	3.33131e-07
Ttc30b	147.192	-25.2266	1.85436	-13.604	3.79356e-42	1.17114e-40
Il18	146.671	-28.2483	2.34495	-12.0464	2.02524e-33	4.74283e-32
Dgka	145.96	-11.248	1.84874	-6.08418	1.17088e-09	9.37676e-09
Gch1	145.62	-21.0777	2.93236	-7.18795	6.577e-13	6.50675e-12
Tcf7l2	145.453	-10.239	1.26755	-8.07782	6.5935e-16	7.6549e-15
Ncapd3	145.253	-8.29423	1.79456	-4.62187	3.80288e-06	2.37037e-05
Wwox	145.218	-6.50523	1.55788	-4.17571	2.97064e-05	0.00017123
Evi5l	145.15	-5.95958	1.50608	-3.95703	7.58888e-05	0.00042057
Ifi35	145.093	-27.5506	1.82196	-15.1215	1.16936e-51	5.16693e-50
Ddx28	144.656	-10.821	1.84806	-5.85532	4.76099e-09	3.64025e-08
Radil	143.939	-27.3438	2.00799	-13.6175	3.15304e-42	9.78937e-41
Rrp9	143.732	-24.3123	1.58756	-15.3143	6.14146e-53	2.85204e-51
Cecr2	143.319	-8.14635	1.3961	-5.8351	5.37596e-09	4.09327e-08
Fzd4	143.085	-27.0977	1.55193	-17.4607	2.85659e-68	2.10937e-66
Prps2	142.991	-24.7001	2.03258	-12.1521	5.59256e-34	1.32676e-32
Cdkn1b	141.921	-4.11868	0.985118	-4.1809	2.90361e-05	0.000167484
Siae	141.784	-27.3778	2.43153	-11.2595	2.07947e-29	4.1878e-28
Krba1	141.65	-7.81204	1.93935	-4.02817	5.62125e-05	0.000315471
Arrb1	141.193	-12.8842	2.0581	-6.26025	3.84361e-10	3.19677e-09
Scly	140.93	-3.9324	1.05058	-3.74308	0.000181779	0.000960021
Nup54	140.898	-24.9971	1.39335	-17.9403	5.71311e-72	4.70628e-70
Pgm5	140.684	-27.4242	1.37757	-19.9076	3.49675e-88	4.73737e-86
Arhgef17	139.026	-24.456	1.53539	-15.9282	4.0376e-57	2.11464e-55
Hip1	138.733	-27.4666	1.83618	-14.9585	1.37082e-50	5.77682e-49
Gstm7	137.845	-27.8579	2.04288	-13.6366	2.4253e-42	7.60191e-41
Kctd12	137.528	-19.7518	3.15341	-6.26364	3.76096e-10	3.13439e-09
Mr1	137.513	-19.1192	1.92344	-9.9401	2.78552e-23	4.43761e-22
Mink1	137.238	-4.17098	0.977771	-4.26581	1.99181e-05	0.000116488
Slc44a3	136.582	-11.0268	1.56362	-7.05208	1.76262e-12	1.70269e-11
Mrm1	136.377	-20.7356	1.79302	-11.5646	6.22577e-31	1.32889e-29
Aaas	135.788	-6.56318	1.56721	-4.18782	2.81646e-05	0.000162743
Ccser1	135.404	-8.51758	1.44733	-5.88505	3.97935e-09	3.0583e-08
Ctdspl	135.172	-27.2324	1.63896	-16.6157	5.36656e-62	3.23434e-60
Pde3b	135.109	-28.0551	2.59256	-10.8214	2.72604e-27	5.13065e-26
Zc3hav1	134.621	-24.9912	1.79474	-13.9247	4.4844e-44	1.49416e-42
Htra1	133.641	-28.2581	3.46241	-8.1614	3.31172e-16	3.90007e-15
Tenm3	133.57	-7.62035	1.49449	-5.09896	3.41529e-07	2.28798e-06
Ift88	133.333	-10.3747	1.21297	-8.55315	1.19776e-17	1.5069e-16
Adamts1	132.945	-27.3511	2.20789	-12.3879	3.0393e-35	7.58345e-34
Vill	132.296	-25.618	2.60478	-9.83501	7.95568e-23	1.24563e-21
St7	131.795	-11.7256	1.85451	-6.32275	2.56956e-10	2.16904e-09
Ing2	131.518	-7.76875	1.52865	-5.08211	3.73257e-07	2.49036e-06
Nudt7	131.393	-25.7806	1.56234	-16.5013	3.58993e-61	2.10178e-59
Tiam2	130.468	-9.06704	1.19301	-7.60011	2.95877e-14	3.1516e-13
Hspa1b	130.229	-24.513	1.78929	-13.6998	1.01778e-42	3.22717e-41
Rorc	130.116	-27.6777	2.15749	-12.8287	1.13289e-37	3.02962e-36
Enpp3	129.337	-27.7752	2.10564	-13.1909	9.90319e-40	2.85313e-38
Tlr3	127.897	-27.2916	2.60936	-10.4591	1.33079e-25	2.35845e-24
Bglap3	127.559	-25.446	1.79129	-14.2054	8.4772e-46	2.96305e-44
2610021A01Rik	127.507	-22.0876	1.92931	-11.4485	2.3935e-30	4.9983e-29
5730409E04Rik	127.125	-9.46965	1.88044	-5.03588	4.75646e-07	3.14561e-06
Haus8	126.629	-25.6973	1.52123	-16.8925	5.11141e-64	3.3383e-62
Pkia	126.381	-26.2676	2.21098	-11.8806	1.49379e-32	3.40107e-31
Dgkd	126.354	-24.9246	1.72031	-14.4885	1.433e-47	5.43776e-46
Phf7	126.328	-24.9151	2.63021	-9.47268	2.72763e-21	3.97458e-20
Trim56	126.045	-27.1994	1.78907	-15.2031	3.37124e-52	1.52665e-50
Plscr3	125.772	-26.6715	1.78644	-14.93	2.10326e-50	8.79561e-49
Fam122b	125.54	-26.6346	1.86154	-14.3078	1.95467e-46	7.05791e-45
Gramd3	125.228	-26.9217	1.70117	-15.8254	2.07941e-56	1.06858e-54
Acp6	124.191	-24.1642	2.17635	-11.1031	1.21196e-28	2.3822e-27
Slc10a3	124.081	-26.7426	1.91913	-13.9348	3.89463e-44	1.3003e-42
Ppp1r36	123.647	-26.7646	1.98062	-13.5132	1.30677e-41	3.95237e-40
Masp1	123.042	-10.544	2.38319	-4.42432	9.67471e-06	5.82437e-05
Aass	123.004	-27.6431	1.90359	-14.5216	8.84592e-48	3.38811e-46
Apool	122.934	-10.8707	1.54301	-7.04513	1.85289e-12	1.78778e-11
Rpgr	122.918	-6.675	1.7179	-3.88556	0.000102094	0.000556765
Sulf2	122.659	-23.8979	2.293	-10.4221	1.96496e-25	3.45248e-24
Klhl25	122.596	-26.295	1.85928	-14.1426	2.0759e-45	7.17939e-44
Lss	122.226	-6.5116	1.69244	-3.84747	0.000119345	0.000644195
Gm49327	122.138	-27.2366	1.67041	-16.3054	9.0347e-60	5.1071e-58
Casp9	121.954	-10.064	1.68652	-5.96731	2.41195e-09	1.88912e-08
Ltbr	121.947	-26.7567	2.19585	-12.1851	3.73129e-34	8.90349e-33
Tnk1	121.931	-6.76021	1.70249	-3.97077	7.16411e-05	0.000398241
Nubpl	121.775	-9.33811	1.59379	-5.85904	4.65543e-09	3.56286e-08
Gm12905	121.568	-9.37013	2.3008	-4.07255	4.6502e-05	0.000263046
Tctn2	121.494	-7.59377	1.57313	-4.82716	1.38493e-06	8.84768e-06
Ovol2	121.309	-26.3	1.86436	-14.1067	3.45395e-45	1.19201e-43
A730020E08Rik	121.251	-12.9786	2.05118	-6.32736	2.49394e-10	2.10738e-09
Trmt9b	121.204	-10.7538	1.55369	-6.92149	4.46921e-12	4.21056e-11
Vwa5a	120.903	-27.0148	2.99498	-9.02001	1.88078e-19	2.54807e-18
Ackr3	120.825	-27.5911	2.28323	-12.0842	1.2798e-33	3.01434e-32
Amer1	120.439	-26.6051	2.17893	-12.2101	2.74465e-34	6.58755e-33
Lrrc8d	120.156	-4.26848	1.07045	-3.98757	6.67536e-05	0.000372335
Dnajc12	119.357	-8.90231	1.59005	-5.59877	2.15882e-08	1.58555e-07
Kat2a	119.23	-11.5226	1.36893	-8.41722	3.85509e-17	4.74448e-16
Alms1	119.169	-7.072	1.64481	-4.29959	1.71116e-05	0.000100658
Gng7	119.116	-12.6513	2.16679	-5.83873	5.26003e-09	4.00873e-08
Ncdn	118.968	-8.06215	1.60049	-5.0373	4.72155e-07	3.12603e-06
Smim13	118.816	-25.9283	1.52825	-16.9661	1.46416e-64	9.67819e-63
Xpnpep3	118.453	-9.90548	1.88821	-5.24595	1.55476e-07	1.07089e-06
Tnik	117.992	-11.7141	2.06515	-5.67228	1.40912e-08	1.0476e-07
Dnase1l1	117.811	-26.4567	1.89617	-13.9527	3.02822e-44	1.01725e-42
Zfp119b	117.349	-10.6204	2.0791	-5.10815	3.25321e-07	2.18296e-06
Gm10638	117.253	-27.8973	1.62011	-17.2194	1.89811e-66	1.32973e-64
Rcan1	117.165	-26.1812	1.66078	-15.7644	5.46622e-56	2.75716e-54
Nhs	117.072	-26.7395	1.81573	-14.7266	4.35179e-49	1.7528e-47
Prodh	116.811	-27.1864	2.08292	-13.0521	6.18188e-39	1.72053e-37
B4galnt3	116.381	-10.5002	1.24223	-8.4527	2.8464e-17	3.52691e-16
Cnpy4	116.352	-9.06336	1.50715	-6.01357	1.81485e-09	1.43516e-08
Nudt19	116.068	-26.885	1.73088	-15.5325	2.08912e-54	1.00137e-52
Wfdc3	115.467	-25.0029	2.29055	-10.9157	9.70257e-28	1.85378e-26
Smcr8	115.444	-25.7731	2.21697	-11.6254	3.06238e-31	6.64041e-30
Wdr19	115.313	-7.28098	1.72564	-4.21928	2.45079e-05	0.000142215
P2ry2	114.624	-26.5892	1.8502	-14.371	7.8672e-47	2.89164e-45
Epha1	113.83	-27.2749	1.81078	-15.0625	2.85722e-51	1.2424e-49
Wdr92	113.826	-25.7222	1.80044	-14.2866	2.65108e-46	9.50966e-45
Disp3	113.808	-24.1411	2.10347	-11.4768	1.72549e-30	3.63573e-29
Rpusd1	113.692	-10.1466	1.67055	-6.07379	1.24928e-09	9.98996e-09
Cdc20	112.837	-27.8621	2.70125	-10.3145	6.05894e-25	1.03571e-23
Ankib1	112.462	-7.2002	1.67603	-4.29599	1.73912e-05	0.000102221
Grb7	112.188	-22.055	1.85841	-11.8677	1.74258e-32	3.95653e-31
Slc35d1	112.085	-25.0116	1.66176	-15.0513	3.3863e-51	1.46469e-49
Hmox1	112.059	-23.5174	2.24094	-10.4944	9.1647e-26	1.63479e-24
Parp12	111.71	-27.5449	2.29145	-12.0207	2.76512e-33	6.44788e-32
Sumf1	111.542	-26.4724	1.65042	-16.0398	6.73295e-58	3.6307e-56
Atp8b2	111.474	-22.6384	1.92201	-11.7785	5.03715e-32	1.12193e-30
Myadm	111.435	-26.1094	2.55021	-10.2381	1.33813e-24	2.25679e-23
Sox21	111.08	-24.9895	1.94306	-12.8609	7.47131e-38	2.01112e-36
Gsg1l	110.989	-14.8114	2.50813	-5.90535	3.51889e-09	2.71955e-08
Naprt	110.839	-24.6064	2.62346	-9.37938	6.63619e-21	9.58477e-20
4732419C18Rik	110.734	-24.8067	2.29726	-10.7984	3.50306e-27	6.56293e-26
Net1	110.413	-24.059	2.35998	-10.1946	2.09649e-24	3.5105e-23
Prdm2	110.196	-7.449	1.25123	-5.95332	2.6275e-09	2.05108e-08
Elac1	110.126	-9.89882	2.09632	-4.72199	2.33543e-06	1.47419e-05
Coro2b	109.626	-8.75981	1.55967	-5.61647	1.94902e-08	1.43532e-07
Rab37	109.484	-32.3661	2.75821	-11.7345	8.48717e-32	1.86752e-30
Stambpl1	109.035	-8.47083	1.87332	-4.52182	6.13092e-06	3.7642e-05
Trp53i13	108.833	-25.5756	1.81743	-14.0724	5.6122e-45	1.9247e-43
Vegfb	108.777	-5.6314	1.46753	-3.83733	0.000124379	0.000670486
B4galt6	108.682	-26.7098	1.33388	-20.0242	3.39087e-89	4.91916e-87
Gsto1	107.86	-21.354	2.54494	-8.39078	4.82945e-17	5.90375e-16
Tcf7l1	107.651	-8.60141	1.86982	-4.60013	4.2223e-06	2.62381e-05
Naf1	107.479	-7.88863	1.57006	-5.0244	5.05008e-07	3.33277e-06
Nln	107.338	-25.7363	1.62035	-15.8832	8.28805e-57	4.32694e-55
Prdm15	107.319	-10.2813	1.85604	-5.53939	3.03532e-08	2.20971e-07
Slco4a1	107.242	-23.215	2.24745	-10.3295	5.18276e-25	8.90577e-24
Itgb6	106.854	-25.6386	1.95331	-13.1258	2.34415e-39	6.64837e-38
Zfp994	106.783	-10.7224	2.01993	-5.30829	1.10658e-07	7.69633e-07
Tmem14a	106.308	-26.0333	1.73869	-14.9729	1.1032e-50	4.67304e-49
Dpm1	106.23	-4.29269	1.128	-3.80559	0.000141468	0.000757621
Cyp2j9	105.863	-27.1177	3.10927	-8.72157	2.74376e-18	3.56124e-17
Tacc3	105.845	-8.52272	1.75414	-4.85863	1.182e-06	7.60162e-06
4930455G09Rik	105.793	-8.48998	1.21986	-6.95982	3.40703e-12	3.22841e-11
Gm14066	105.687	-11.1837	1.73388	-6.45009	1.1178e-10	9.69529e-10
Zfp937	105.679	-9.66173	2.48438	-3.88899	0.000100662	0.000549499
Fam83f	105.472	-26.4419	1.57387	-16.8006	2.41628e-63	1.52347e-61
Slc22a17	105.444	-26.8558	2.07764	-12.9261	3.20583e-38	8.72975e-37
Tmem102	105.254	-5.97048	1.50992	-3.95417	7.68014e-05	0.000425483
Tmco6	104.775	-25.4414	1.98642	-12.8077	1.48511e-37	3.95859e-36
Cpne2	104.735	-11.1014	1.59221	-6.97235	3.11699e-12	2.9587e-11
Filip1	104.623	-11.1436	1.88612	-5.90822	3.45831e-09	2.67541e-08
Pafah2	104.466	-26.4806	2.03084	-13.0392	7.31817e-39	2.02646e-37
Helz2	104.46	-9.40368	1.80349	-5.21417	1.84639e-07	1.26327e-06
Stk35	104.385	-5.28128	1.36766	-3.86155	0.000112671	0.000610584
Pank1	103.708	-25.2029	1.9218	-13.1142	2.72923e-39	7.71383e-38
Nat2	103.66	-24.9286	2.0521	-12.1478	5.88984e-34	1.39325e-32
Rbfox3	103.213	-18.7167	2.97334	-6.29484	3.07726e-10	2.57769e-09
Nkd2	103.058	-30.3951	2.63294	-11.5442	7.90064e-31	1.67983e-29
Aatk	102.935	-25.3144	1.7647	-14.3448	1.14759e-46	4.18054e-45
Myzap	102.648	-25.24	2.32235	-10.8683	1.63246e-27	3.10452e-26
Flot2	102.184	-25.3313	1.76373	-14.3624	8.91285e-47	3.26135e-45
Rhbdf1	102.15	-26.1793	2.21885	-11.7986	3.96948e-32	8.90173e-31
Lekr1	101.766	-25.7454	1.84931	-13.9216	4.67983e-44	1.55296e-42
Vegfd	101.372	-23.3689	1.90468	-12.2692	1.32522e-34	3.23279e-33
P4htm	101.227	-8.48991	2.18844	-3.87943	0.000104703	0.000569854
Mettl18	101.17	-25.8422	2.29704	-11.2502	2.30983e-29	4.64032e-28
Atg10	100.731	-9.89197	1.89869	-5.20989	1.88955e-07	1.2901e-06
Pkn3	100.605	-20.0929	2.20709	-9.10381	8.7215e-20	1.20043e-18
Atxn3	100.567	-9.84626	1.45378	-6.77285	1.26271e-11	1.1603e-10
Parp9	100.526	-27.6313	3.47828	-7.94396	1.95833e-15	2.20942e-14
Haus3	100.325	-9.81813	1.74788	-5.61715	1.94133e-08	1.4303e-07
Mypn	99.9238	-12.9375	2.06552	-6.26355	3.76318e-10	3.13465e-09
Slc4a10	99.6851	-26.9934	1.61811	-16.682	1.77041e-62	1.10351e-60
Arg2	99.522	-26.6793	1.8913	-14.1063	3.47136e-45	1.19551e-43
Tmc6	99.5093	-25.4861	2.75406	-9.25403	2.1619e-20	3.05254e-19
Mylip	99.3443	-24.9594	2.78446	-8.96384	3.13568e-19	4.23071e-18
Efcab15	99.2029	-4.28224	1.1162	-3.83645	0.000124826	0.000672674
Col9a3	98.6497	-12.5894	2.56548	-4.90721	9.23788e-07	5.99037e-06
Gm13782	98.6339	-24.7731	1.97732	-12.5286	5.20766e-36	1.33598e-34
Pdzd8	98.4205	-9.09198	1.57323	-5.77917	7.5072e-09	5.65039e-08
Bbc3	98.1273	-16.2476	2.07835	-7.81754	5.3867e-15	5.92248e-14
Lhfpl2	98.1065	-17.582	2.25863	-7.78436	7.00694e-15	7.67812e-14
Psapl1	97.8595	-40.0292	3.39531	-11.7896	4.41888e-32	9.86903e-31
Fbxo10	97.5597	-23.9526	1.5834	-15.1273	1.07008e-51	4.7539e-50
Gm42528	97.3186	-25.533	1.99361	-12.8075	1.48939e-37	3.96357e-36
Camk1d	97.2824	-10.9871	1.46386	-7.50558	6.11565e-14	6.4019e-13
Arhgap31	97.2039	-26.5704	1.80791	-14.6968	6.75876e-49	2.68923e-47
Wdr55	96.8456	-24.732	1.71708	-14.4035	4.91707e-47	1.82365e-45
Arhgap33	96.8206	-27.6682	2.41439	-11.4597	2.10204e-30	4.4065e-29
2610528J11Rik	96.7894	-27.2014	1.85205	-14.6872	7.78657e-49	3.08322e-47
Polk	96.6182	-8.02329	1.84272	-4.35404	1.33651e-05	7.94108e-05
Nrtn	96.6026	-9.78733	1.64374	-5.9543	2.61187e-09	2.04082e-08
Pllp	96.4586	-11.0198	1.44821	-7.6093	2.75592e-14	2.93743e-13
H2-Q10	96.3672	-12.9417	2.82629	-4.57903	4.67135e-06	2.89408e-05
Zfp747	96.2564	-23.7721	3.03736	-7.82658	5.01314e-15	5.52287e-14
Dse	96.157	-26.4846	2.03028	-13.0448	6.80691e-39	1.88808e-37
H2-DMb1	96.0268	-27.0313	2.37363	-11.3882	4.78867e-30	9.91169e-29
Echdc3	95.3602	-26.3532	2.44973	-10.7576	5.458e-27	1.01558e-25
Arsg	95.0803	-23.8758	1.76845	-13.501	1.54243e-41	4.65656e-40
Kcnab1	95.0253	-21.7694	2.72179	-7.99819	1.26264e-15	1.44139e-14
Fam117a	94.5776	-25.2228	1.02993	-24.4898	1.89564e-132	1.3511e-129
Nme5	94.5292	-24.9128	1.55005	-16.0723	3.99137e-58	2.17377e-56
Arhgap42	94.4203	-10.8495	2.29413	-4.72923	2.25371e-06	1.42425e-05
Scnn1a	94.3247	-24.5812	2.13556	-11.5104	1.16921e-30	2.46678e-29
Mical1	94.2461	-19.7153	2.63934	-7.4698	8.03176e-14	8.35966e-13
Klhl23	94.1282	-25.9228	2.60119	-9.96575	2.15243e-23	3.44241e-22
Tmem125	93.873	-38.205	2.80113	-13.6392	2.34227e-42	7.35572e-41
Batf	93.8179	-24.7475	3.07085	-8.05885	7.70168e-16	8.90993e-15
Slc25a24	93.5994	-24.8008	2.41532	-10.2681	9.80719e-25	1.66084e-23
Myd88	93.3092	-26.0248	1.79325	-14.5127	1.00707e-47	3.84821e-46
Pld1	93.2688	-26.2353	2.14829	-12.2121	2.67759e-34	6.44549e-33
Pcsk4	93.0795	-15.5748	2.90188	-5.36715	7.99888e-08	5.63497e-07
Lpgat1	93.037	-26.7675	2.04804	-13.0698	4.89658e-39	1.37213e-37
Gm38228	92.7143	-5.69534	1.17112	-4.86317	1.15523e-06	7.43824e-06
Acsl5	92.6938	-25.982	1.72131	-15.0943	1.76484e-51	7.73556e-50
Egfros	92.6217	-26.2997	1.93597	-13.5848	4.92834e-42	1.51577e-40
Clcn5	92.6133	-24.9215	2.12652	-11.7194	1.01373e-31	2.22465e-30
9130008F23Rik	92.5605	-26.2825	1.92755	-13.6352	2.47405e-42	7.72518e-41
Pwwp2b	92.2933	-7.74294	1.93113	-4.00955	6.08358e-05	0.000340253
Sugct	92.212	-8.66706	2.06279	-4.20161	2.6502e-05	0.000153298
Sytl5	92.0705	-25.2341	1.97573	-12.772	2.34893e-37	6.21066e-36
Reep6	92.0272	-8.75589	2.31922	-3.77536	0.000159779	0.000849578
A730089K16Rik	92.0005	-26.9012	2.48446	-10.8278	2.54229e-27	4.79032e-26
Slc25a53	91.9472	-25.2651	1.93168	-13.0793	4.323e-39	1.21556e-37
Bivm	91.8203	-8.31425	1.96639	-4.22818	2.35585e-05	0.000136997
Clybl	91.7526	-26.8397	2.15738	-12.4409	1.56748e-35	3.94711e-34
Rhbdl3	91.5491	-23.1873	2.02747	-11.4366	2.74578e-30	5.72666e-29
Btbd17	91.5292	-21.6788	1.56921	-13.8151	2.06629e-43	6.72077e-42
Gemin8	91.5243	-10.2648	2.01165	-5.10268	3.34875e-07	2.24432e-06
Rnf125	91.4431	-35.6301	2.68324	-13.2788	3.07316e-40	8.93232e-39
Gpr157	90.9212	-14.9395	1.74688	-8.55209	1.20877e-17	1.51958e-16
Plekhd1	90.4999	-27.7549	2.1894	-12.677	7.93577e-37	2.07482e-35
Kazn	90.3526	-26.1896	1.71698	-15.2532	1.5669e-52	7.21521e-51
Inf2	90.3155	-26.8247	1.97325	-13.5941	4.33895e-42	1.337e-40
1810020O05Rik	89.4093	-8.96288	1.97487	-4.53847	5.6663e-06	3.4894e-05
Pycard	88.9559	-8.20837	2.0082	-4.08742	4.36189e-05	0.000247335
Gm49331	88.6776	-26.1793	2.34944	-11.1428	7.76801e-29	1.53608e-27
Eri1	88.3291	-24.9966	2.16081	-11.5682	5.97319e-31	1.27831e-29
Itpkc	88.2668	-24.1486	1.75457	-13.7632	4.24112e-43	1.36056e-41
Spata13	88.2002	-25.3037	1.94197	-13.0299	8.26908e-39	2.28592e-37
Atoh8	87.441	-21.1861	2.74864	-7.70785	1.27952e-14	1.38267e-13
Fam151b	87.4055	-25.0656	1.81578	-13.8043	2.39969e-43	7.75898e-42
2810006K23Rik	87.3688	-9.60732	1.58289	-6.06947	1.2833e-09	1.0247e-08
Pdxk	86.8369	-9.13496	1.58648	-5.758	8.51151e-09	6.38285e-08
6330411D24Rik	86.4777	-10.9966	0.870057	-12.6389	1.28798e-36	3.3461e-35
Cthrc1	86.4761	-10.9688	2.035	-5.39007	7.04305e-08	4.9938e-07
Bcar3	86.0917	-27.0589	1.63088	-16.5916	8.02194e-62	4.78195e-60
Hs3st6	86.0441	-26.3658	2.63003	-10.0249	1.18456e-23	1.91694e-22
Cish	85.8771	-21.5937	2.33064	-9.26516	1.94789e-20	2.76226e-19
Bbs5	85.6048	-10.3628	1.75436	-5.90689	3.48627e-09	2.69577e-08
1700017B05Rik	85.5843	-26.5592	2.66753	-9.95647	2.36297e-23	3.77177e-22
Mfsd2a	85.2389	-27.2616	2.12154	-12.8499	8.61045e-38	2.31395e-36
N4bp3	85.2333	-23.9063	3.78044	-6.32369	2.55395e-10	2.15698e-09
Abracl	85.0504	-8.17419	1.20487	-6.78428	1.1667e-11	1.07448e-10
Cyb5d1	84.6396	-11.2339	1.68647	-6.66121	2.71585e-11	2.44084e-10
Nek8	84.4066	-25.2793	2.07835	-12.1632	4.88313e-34	1.16182e-32
Gck	84.252	-15.9947	3.12311	-5.12139	3.0329e-07	2.04091e-06
Vrk2	84.0555	-26.3452	2.14008	-12.3104	7.96424e-35	1.95446e-33
Slc39a1	83.5964	-4.27617	0.960545	-4.45181	8.51478e-06	5.15256e-05
Irgm2	83.5312	-12.7598	3.37189	-3.78418	0.000154218	0.00082188
Snrnp35	83.4495	-25.5801	1.87921	-13.6121	3.39208e-42	1.05116e-40
Cep135	83.4313	-25.6817	2.6901	-9.54673	1.33851e-21	1.98752e-20
Ccdc17	83.3126	-26.1911	3.0717	-8.52657	1.50749e-17	1.885e-16
Slc30a4	82.8063	-9.06155	1.89257	-4.78795	1.68491e-06	1.07182e-05
Gm7467	82.7965	-24.8575	1.49029	-16.6797	1.8422e-62	1.14391e-60
Zfp758	82.7747	-10.2318	2.0562	-4.97607	6.48891e-07	4.24472e-06
Uevld	82.6007	-7.55641	1.77888	-4.24785	2.15837e-05	0.00012587
Zfp442	82.5586	-11.5554	1.79726	-6.42944	1.28073e-10	1.10675e-09
Zbtb3	82.3029	-22.4605	3.61899	-6.20628	5.42552e-10	4.45148e-09
Arhgef37	82.1106	-24.5927	2.15212	-11.4272	3.05664e-30	6.35881e-29
Fosl2	81.9206	-19.2523	1.85193	-10.3958	2.59057e-25	4.53226e-24
Smarca1	81.2959	-25.8207	3.31668	-7.7851	6.96555e-15	7.63788e-14
Tmem185b	81.0878	-25.8757	2.49472	-10.3722	3.31909e-25	5.77599e-24
Cbx8	80.8687	-23.6141	2.10568	-11.2145	3.46155e-29	6.87821e-28
Slc44a4	80.5396	-26.807	2.8931	-9.26585	1.9353e-20	2.74678e-19
Wdr4	80.0947	-23.4321	2.17739	-10.7616	5.22684e-27	9.74785e-26
E130309D02Rik	79.6841	-22.4952	1.91461	-11.7492	7.12801e-32	1.58333e-30
Slc66a2	79.632	-22.8797	2.36787	-9.66255	4.34898e-22	6.57683e-21
Apobec3	79.3605	-21.1299	2.12119	-9.96132	2.25062e-23	3.59595e-22
Zfand4	78.9855	-10.5698	1.96708	-5.37334	7.72906e-08	5.45191e-07
Rims4	78.8654	-26.3106	2.19813	-11.9695	5.13214e-33	1.18662e-31
Zfp709	78.8026	-23.2852	2.65019	-8.78624	1.54655e-18	2.03799e-17
Lyn	78.5732	-22.916	2.41438	-9.49145	2.27844e-21	3.34383e-20
9430038I01Rik	78.4496	-25.6171	1.52017	-16.8514	1.02428e-63	6.58474e-62
Slc25a18	78.3693	-26.0135	1.66531	-15.6208	5.25539e-55	2.55643e-53
Pdp1	78.0837	-24.3468	2.38891	-10.1916	2.16172e-24	3.61603e-23
Bmp2k	77.8652	-9.62949	1.41899	-6.78618	1.15141e-11	1.06159e-10
Gm47585	77.712	-24.1142	1.67159	-14.4259	3.55654e-47	1.32807e-45
Gm48582	77.6342	-26.7981	2.31677	-11.567	6.05586e-31	1.29431e-29
Gm14295	77.5716	-6.87247	1.53648	-4.47287	7.71777e-06	4.68756e-05
Arhgef10l	77.5616	-21.729	1.5884	-13.6798	1.34152e-42	4.23728e-41
Il6ra	77.4403	-22.9405	2.41666	-9.49266	2.25212e-21	3.30815e-20
6330403K07Rik	77.4354	-15.0465	2.62487	-5.73231	9.90725e-09	7.39906e-08
Fam71a	77.2734	-39.7406	2.76281	-14.3841	6.50757e-47	2.40267e-45
Dsel	77.1922	-24.1845	2.3771	-10.1739	2.59226e-24	4.32739e-23
1700007K13Rik	77.1055	-23.359	2.12749	-10.9796	4.7887e-28	9.26815e-27
A130012E19Rik	76.7701	-26.2244	1.90347	-13.7772	3.49752e-43	1.12864e-41
Itgbl1	75.7949	-9.10281	1.058	-8.60383	7.70972e-18	9.78215e-17
Tspan15	75.7726	-26.0533	2.48117	-10.5004	8.60028e-26	1.53745e-24
Accs	74.8356	-24.3223	2.27641	-10.6845	1.20324e-26	2.20882e-25
Pard6g	74.5107	-20.4119	2.4406	-8.36349	6.08908e-17	7.41041e-16
Rassf3	74.4647	-9.85173	1.49318	-6.5978	4.1731e-11	3.70985e-10
Dennd2a	74.1396	-9.66202	1.35829	-7.11335	1.1326e-12	1.10254e-11
Ak8	73.985	-22.5216	2.6648	-8.45152	2.87525e-17	3.55997e-16
1700084E18Rik	73.9049	-17.6541	2.32488	-7.59356	3.11235e-14	3.30659e-13
Trim50	73.6399	-19.5968	3.45729	-5.66825	1.44261e-08	1.07153e-07
1700037C18Rik	73.397	-25.4414	2.53462	-10.0376	1.04222e-23	1.69496e-22
BC052040	73.3023	-25.6054	3.08214	-8.30769	9.75842e-17	1.17366e-15
Apoe	73.2708	-8.61187	1.71529	-5.02065	5.14973e-07	3.39571e-06
Hyal2	73.2423	-24.4792	3.05187	-8.02106	1.0484e-15	1.20354e-14
Chst13	73.0763	-23.9197	2.76568	-8.64875	5.20658e-18	6.64731e-17
Ralb	73.0601	-23.4904	1.90233	-12.3482	4.98003e-35	1.22948e-33
Pfkfb3	73.0008	-24.7759	1.98452	-12.4846	9.06218e-36	2.3032e-34
Tmem229b	72.9249	-24.2888	2.04546	-11.8745	1.60589e-32	3.65123e-31
BC049715	72.6744	-8.09326	1.83993	-4.39867	1.08916e-05	6.52583e-05
Gm42929	72.3616	-25.9502	2.66759	-9.72797	2.29123e-22	3.51687e-21
Reep2	72.2205	-8.18658	2.14385	-3.81863	0.000134195	0.000720319
Gm48882	72.1667	-10.7845	2.21938	-4.85927	1.17822e-06	7.58029e-06
Cfi	72.1617	-23.1907	2.33081	-9.94959	2.53213e-23	4.03785e-22
A230001M10Rik	72.1385	-32.721	2.74978	-11.8995	1.19095e-32	2.72291e-31
Ston2	71.994	-9.90589	1.52995	-6.47465	9.50338e-11	8.28224e-10
Qrsl1	71.7533	-25.2847	1.94486	-13.0008	1.21032e-38	3.32898e-37
Gm9847	71.51	-3.56707	0.807215	-4.41899	9.91644e-06	5.96551e-05
Gm31036	71.4483	-26.4966	2.5297	-10.4742	1.13494e-25	2.01791e-24
Fhad1	71.0074	-25.5959	1.76541	-14.4986	1.23623e-47	4.70198e-46
Epb41l3	70.963	-10.9456	2.12169	-5.15889	2.48417e-07	1.68138e-06
1700030C10Rik	70.7846	-26.2804	2.22616	-11.8052	3.6672e-32	8.23513e-31
Slc22a5	70.5852	-10.4329	2.2012	-4.73963	2.14105e-06	1.35462e-05
Polr1e	69.8846	-24.8688	1.93632	-12.8433	9.37636e-38	2.51566e-36
Socs1	69.8536	-25.1453	2.31658	-10.8545	1.89836e-27	3.606e-26
Sptlc3	69.822	-26.5467	2.1704	-12.2312	2.11713e-34	5.1189e-33
Snx22	69.6531	-26.476	2.72642	-9.7109	2.70929e-22	4.14305e-21
5730420D15Rik	69.5666	-25.4308	1.49356	-17.0269	5.18714e-65	3.45662e-63
Pacrg	69.3363	-8.76758	2.25959	-3.88017	0.000104384	0.000568304
Fam83h	69.2926	-8.89166	2.02913	-4.382	1.17594e-05	7.02521e-05
Prr15	69.2543	-24.2123	1.97632	-12.2512	1.65494e-34	4.01322e-33
Slc15a5	69.219	-26.2884	2.22877	-11.795	4.14099e-32	9.26103e-31
Ttyh1	68.7911	-26.8461	2.05489	-13.0644	5.25632e-39	1.47043e-37
Wdr24	68.591	-8.1151	2.09951	-3.86523	0.000110986	0.000602845
Lamc2	68.4456	-24.3223	3.13155	-7.76685	8.04597e-15	8.76173e-14
Snhg6	68.2796	-4.96892	1.2576	-3.9511	7.77924e-05	0.000430682
Oas1b	68.2471	-27.2604	3.68251	-7.40266	1.33481e-13	1.37706e-12
Gm15760	68.0874	-26.269	2.21513	-11.8589	1.93557e-32	4.38863e-31
Gm35315	68.0292	-21.0726	2.97341	-7.08701	1.37037e-12	1.33241e-11
Rfc3	67.9705	-25.1584	2.05352	-12.2514	1.65132e-34	4.01039e-33
Pus7l	67.9148	-24.0186	2.53244	-9.48438	2.43837e-21	3.56894e-20
Ano6	67.9101	-26.9087	1.97717	-13.6097	3.50759e-42	1.0849e-40
Dph1	67.6413	-25.5194	2.35564	-10.8333	2.39298e-27	4.51417e-26
Gm20008	67.1471	-8.65393	2.21551	-3.90607	9.38089e-05	0.000515352
Ccdc126	67.0367	-25.6687	2.78244	-9.22524	2.82915e-20	3.95895e-19
Prune2	66.7252	-10.5955	1.87086	-5.66346	1.48349e-08	1.1009e-07
Nfil3	66.6697	-25.6037	3.17083	-8.07476	6.76099e-16	7.84381e-15
Dtx3l	66.3328	-26.8898	2.72195	-9.87888	5.14056e-23	8.14982e-22
Dhx34	66.2612	-24.1894	2.00544	-12.0619	1.6792e-33	3.93807e-32
D230025D16Rik	66.0762	-25.9278	2.01536	-12.8651	7.07715e-38	1.90815e-36
Gm3325	65.5009	-26.5777	2.01598	-13.1835	1.09199e-39	3.14053e-38
Gm38116	65.4218	-22.5896	2.54976	-8.85951	8.03644e-19	1.06933e-17
Zbtb8b	65.2968	-24.0597	2.04986	-11.7372	8.21174e-32	1.81178e-30
Snhg4	65.2155	-23.8074	2.06809	-11.5118	1.15049e-30	2.43042e-29
Spon1	65.1273	-25.5678	1.96829	-12.9899	1.39668e-38	3.83513e-37
Elf5	64.4678	-25.041	1.91858	-13.0519	6.20065e-39	1.72283e-37
Klk1b8	64.3661	-22.4033	2.55982	-8.75192	2.09752e-18	2.75518e-17
Gprc5b	64.3276	-26.9728	1.58958	-16.9685	1.40378e-64	9.31664e-63
Gm15454	64.2123	-6.03513	1.57396	-3.83437	0.000125888	0.000677948
Gm43654	64.0248	-24.0189	1.92239	-12.4943	8.0228e-36	2.04538e-34
Tango2	63.9894	-10.2204	2.50801	-4.07511	4.59928e-05	0.000260256
Sirt6	63.9577	-5.88859	1.31087	-4.49213	7.05132e-06	4.30018e-05
Ism1	63.7924	-26.4906	1.83128	-14.4656	1.99719e-47	7.52642e-46
Zcwpw1	63.0065	-9.34418	1.84377	-5.06797	4.02081e-07	2.67831e-06
Hccs	62.9295	-7.83201	1.95823	-3.99953	6.34677e-05	0.000354489
Syt10	62.7883	-38.773	1.9772	-19.61	1.2696e-85	1.58875e-83
Mpst	62.7049	-24.8653	1.63733	-15.1865	4.34621e-52	1.95735e-50
Rnf225	62.4231	-24.4427	3.39436	-7.20099	5.97787e-13	5.93192e-12
Gm38240	62.2908	-14.8613	3.34011	-4.44935	8.61298e-06	5.20814e-05
Capsl	62.0333	-24.9657	2.18382	-11.4321	2.89033e-30	6.02047e-29
Cryl1	62.0181	-25.7697	2.24723	-11.4673	1.92516e-30	4.04605e-29
Loxl2	61.9242	-10.5045	1.94014	-5.41432	6.15211e-08	4.38294e-07
Nrm	61.8463	-22.4701	3.57678	-6.2822	3.33809e-10	2.7919e-09
Pbld2	61.8034	-25.1341	3.27574	-7.6728	1.68285e-14	1.80779e-13
Sat2	61.7815	-26.7413	2.42919	-11.0083	3.4839e-28	6.75877e-27
A330076H08Rik	61.7529	-23.7028	2.46894	-9.60041	7.96304e-22	1.18996e-20
Ghdc	61.6782	-22.217	2.41045	-9.21696	3.05655e-20	4.26798e-19
Kif9	61.6431	-25.8977	1.64775	-15.717	1.15685e-55	5.76422e-54
Kctd14	61.2383	-23.12	2.1577	-10.7151	8.64172e-27	1.59352e-25
Crppa	61.236	-26.0703	2.42293	-10.7598	5.3277e-27	9.92465e-26
5930430L01Rik	61.0862	-27.025	2.1682	-12.4642	1.16977e-35	2.96843e-34
Vat1	60.8263	-8.99666	1.15882	-7.76365	8.25178e-15	8.97026e-14
Adamts9	60.8147	-10.4882	1.76595	-5.9391	2.86591e-09	2.22975e-08
Hpdl	60.7535	-25.1175	3.64041	-6.89963	5.21368e-12	4.89787e-11
Six5	60.3682	-22.1957	2.27371	-9.76189	1.64077e-22	2.53507e-21
Heph	59.9434	-30.5702	2.87858	-10.6199	2.40871e-26	4.38247e-25
Stk33	59.9414	-20.2736	2.82911	-7.16605	7.71902e-13	7.60974e-12
Mettl1	59.6589	-9.01224	1.68669	-5.34314	9.13496e-08	6.41179e-07
Tnfrsf4	59.3656	-40.2077	4.3849	-9.16959	4.74813e-20	6.57954e-19
Gm9887	59.1528	-26.5642	2.99139	-8.88022	6.67283e-19	8.90054e-18
BC051408	58.7466	-37.3305	3.47818	-10.7328	7.14305e-27	1.32163e-25
Zfp729b	58.7332	-18.7624	2.31931	-8.08965	5.98342e-16	6.95647e-15
Tmem211	58.7081	-39.1931	2.45976	-15.9337	3.69733e-57	1.94264e-55
Slc25a41	58.7047	-10.4305	2.51259	-4.15128	3.30617e-05	0.000189902
Gm15915	58.4966	-10.4328	2.27906	-4.57767	4.70183e-06	2.91187e-05
Ripor1	58.4299	-24.7635	1.7753	-13.9489	3.19408e-44	1.06858e-42
Trmt61a	58.3962	-24.4627	2.61207	-9.36529	7.58425e-21	1.08869e-19
Gpm6b	58.0538	-25.3228	2.91231	-8.69511	3.46507e-18	4.47267e-17
Mocos	57.7646	-37.5914	1.96407	-19.1396	1.1824e-81	1.25865e-79
Rab35	57.7509	-11.3288	1.62115	-6.9881	2.78626e-12	2.65553e-11
Gm17709	57.5529	-25.0486	1.36162	-18.3962	1.40938e-75	1.29797e-73
Tcaf1	57.5443	-26.0006	2.31543	-11.2293	2.92844e-29	5.84725e-28
Srbd1	57.3599	-25.8593	2.19208	-11.7967	4.05827e-32	9.08841e-31
Flot1	57.2062	-26.5572	2.57227	-10.3244	5.46552e-25	9.3622e-24
Sgsh	57.1875	-6.03229	1.60323	-3.76258	0.000168166	0.000891863
Tceal1	57.1795	-24.4894	2.47951	-9.87668	5.25467e-23	8.32269e-22
Pla2g5	57.0615	-26.733	2.34977	-11.3768	5.45357e-30	1.12453e-28
Specc1	56.9506	-25.9831	2.43764	-10.6591	1.58084e-26	2.89227e-25
Bend6	56.8673	-39.7088	2.89093	-13.7356	6.21111e-43	1.97706e-41
A230057D06Rik	56.8669	-17.9896	2.66799	-6.74276	1.55409e-11	1.41613e-10
Dcaf12l1	56.6951	-24.2621	3.06987	-7.90329	2.71639e-15	3.03543e-14
Sorcs2	56.6544	-25.6801	2.96663	-8.65631	4.8728e-18	6.24549e-17
Slc26a11	56.3623	-26.4945	2.92525	-9.05717	1.33877e-19	1.82734e-18
Megf10	56.0825	-35.9458	3.50466	-10.2566	1.10559e-24	1.86844e-23
Rab34	56.0791	-23.2233	2.56785	-9.04386	1.51238e-19	2.06089e-18
Tlnrd1	56.0713	-8.10995	1.30963	-6.19254	5.9204e-10	4.84539e-09
Mmp28	55.9892	-25.6691	3.08637	-8.31691	9.02866e-17	1.08669e-15
Meltf	55.4574	-10.2878	2.18473	-4.70895	2.49e-06	1.56693e-05
Prr12	55.4093	-5.40172	1.30244	-4.14739	3.36294e-05	0.000192892
Zfp974	55.0639	-9.27527	2.03483	-4.55824	5.15834e-06	3.18976e-05
Jmjd8	54.9224	-8.27859	1.57419	-5.25894	1.44888e-07	1.00091e-06
Gm48405	54.8961	-40.3307	2.6465	-15.2393	1.93968e-52	8.88187e-51
S1pr2	54.8383	-11.376	2.14151	-5.31214	1.08347e-07	7.54519e-07
Cyp27a1	54.5387	-37.8305	2.693	-14.0477	7.95629e-45	2.71724e-43
Sowahc	54.3867	-24.1446	4.20729	-5.73876	9.53745e-09	7.13263e-08
Lockd	54.3501	-7.29386	1.79604	-4.06108	4.88455e-05	0.000275732
Trim6	54.2795	-33.5733	2.8796	-11.659	2.06421e-31	4.49981e-30
Prox1os	54.1921	-25.6809	2.83427	-9.06085	1.29433e-19	1.76964e-18
Gm44190	54.1259	-10.1938	2.07477	-4.91321	8.9595e-07	5.81676e-06
Tubd1	54.0568	-28.5832	2.44567	-11.6873	1.48049e-31	3.23596e-30
Lysmd1	53.826	-25.0758	1.69687	-14.7777	2.0413e-49	8.30349e-48
Gm40614	53.6172	-10.3071	1.46522	-7.0345	1.99984e-12	1.9239e-11
Urb2	53.4289	-25.193	2.11229	-11.9269	8.57121e-33	1.9679e-31
Ppfia2	53.3688	-26.3067	2.05025	-12.8309	1.10008e-37	2.94667e-36
Reep4	53.2985	-24.0985	2.44398	-9.86036	6.18287e-23	9.73638e-22
Adamts2	53.0983	-24.1749	2.99983	-8.05875	7.70777e-16	8.91068e-15
Nmi	52.8867	-25.5789	3.01478	-8.48451	2.16627e-17	2.69641e-16
Il4ra	52.8679	-24.8209	2.13638	-11.6182	3.32975e-31	7.19165e-30
4631405J19Rik	52.8151	-15.1535	3.32901	-4.55195	5.3152e-06	3.28429e-05
Msrb2	52.7649	-26.1501	2.39847	-10.9028	1.11723e-27	2.12962e-26
C2cd4c	52.723	-7.00994	1.67523	-4.18446	2.85845e-05	0.000164995
Rnf217	52.6936	-24.7879	2.22976	-11.1168	1.039e-28	2.04716e-27
Gm15963	52.4151	-10.2743	1.71988	-5.97384	2.31733e-09	1.81761e-08
A630052C17Rik	52.3706	-20.3778	2.54779	-7.99823	1.26223e-15	1.44139e-14
Zfp280b	52.3067	-25.451	2.60162	-9.78277	1.33504e-22	2.07247e-21
Lratd1	52.2877	-18.3185	3.49096	-5.24741	1.54255e-07	1.06337e-06
Cdk18	52.1976	-22.743	2.88037	-7.89588	2.88285e-15	3.21925e-14
Saxo2	52.1482	-8.25098	1.98811	-4.15016	3.32245e-05	0.000190703
Brip1os	52.0132	-10.9278	2.17909	-5.01485	5.30744e-07	3.49417e-06
Iqcg	51.9986	-25.425	2.28985	-11.1033	1.20835e-28	2.37797e-27
Cd27	51.967	-9.91773	1.67746	-5.91236	3.37245e-09	2.61023e-08
Dennd2c	51.9395	-22.9898	3.05251	-7.53143	5.01892e-14	5.26729e-13
Cdsn	51.8637	-10.2444	2.1812	-4.69667	2.64443e-06	1.66092e-05
Zbed3	51.5727	-24.7213	2.20172	-11.2281	2.96655e-29	5.91615e-28
Ubxn10	51.4822	-24.8143	3.43891	-7.21574	5.36401e-13	5.34218e-12
Nfxl1	51.2959	-10.0789	2.36049	-4.26983	1.95621e-05	0.000114529
Atic	51.2362	-8.2511	1.37273	-6.01073	1.84687e-09	1.45837e-08
Cenpl	51.23	-10.8727	2.34531	-4.63594	3.55322e-06	2.21981e-05
Ccdc51	51.2282	-25.5423	2.6981	-9.46678	2.88591e-21	4.19775e-20
Foxq1	50.9934	-21.8853	2.58194	-8.47632	2.32437e-17	2.88881e-16
Rpl23a	50.9648	-2.18892	0.320013	-6.84011	7.9135e-12	7.34991e-11
Fabp3-ps1	50.8472	-7.01798	1.10778	-6.33515	2.37114e-10	2.00983e-09
1700120C14Rik	50.7519	-8.02225	1.96333	-4.08605	4.38774e-05	0.000248629
Gm26549	50.7414	-26.2673	2.63298	-9.97625	1.93648e-23	3.10614e-22
Efna4	50.6611	-10.6028	2.16553	-4.89617	9.77211e-07	6.32678e-06
Trim34a	50.5853	-24.7418	2.698	-9.17043	4.71126e-20	6.53399e-19
Tmem253	50.5594	-39.1173	2.58491	-15.1329	9.8217e-52	4.38712e-50
Rai14	50.55	-25.8056	2.09178	-12.3367	5.74876e-35	1.41713e-33
Sobp	50.541	-24.0266	2.09447	-11.4714	1.83578e-30	3.86315e-29
Mybph	50.3731	-10.2168	1.56072	-6.54617	5.9033e-11	5.19446e-10
Gm16046	50.3259	-24.9068	1.8423	-13.5194	1.20136e-41	3.64028e-40
Gm37018	50.3216	-26.6606	3.18872	-8.36092	6.22322e-17	7.56243e-16
1110020A21Rik	50.3137	-25.6871	2.0549	-12.5004	7.42579e-36	1.89908e-34
Ptpre	50.1757	-29.8023	2.4347	-12.2406	1.88548e-34	4.56554e-33
Tcea3	50.1452	-27.1387	1.95702	-13.8674	9.98938e-44	3.28827e-42
D030028A08Rik	50.0161	-26.0574	3.55354	-7.33282	2.25367e-13	2.29184e-12
Rcc1	49.7817	-25.4164	2.48287	-10.2367	1.35783e-24	2.28765e-23
C330013E15Rik	49.7362	-26.1097	2.51958	-10.3627	3.66293e-25	6.36085e-24
Pcgf2	49.6523	-22.5106	1.90625	-11.8089	3.51268e-32	7.89895e-31
Adar	49.5656	-24.9295	1.82687	-13.646	2.13159e-42	6.71984e-41
Nr2c1	49.5435	-9.10523	2.27095	-4.00944	6.08631e-05	0.00034029
Rita1	49.3593	-22.8084	2.05998	-11.0721	1.71255e-28	3.35009e-27
Nhlrc3	49.2195	-25.5774	2.26183	-11.3083	1.1937e-29	2.42783e-28
Tgm2	49.1148	-23.544	2.25495	-10.4411	1.61012e-25	2.83814e-24
Atp11c	48.9453	-25.5434	2.41222	-10.5892	3.34471e-26	6.07196e-25
Trim59	48.8933	-24.9384	3.59036	-6.94595	3.7593e-12	3.55399e-11
Gm17435	48.8767	-26.0509	2.59141	-10.0528	8.93043e-24	1.45813e-22
N4bp2l1	48.8183	-25.6114	2.87123	-8.91998	4.66365e-19	6.24602e-18
Lox	48.8021	-26.8826	2.7798	-9.67068	4.0169e-22	6.10845e-21
Kif3c	48.5697	-24.6573	1.92422	-12.8142	1.36571e-37	3.64626e-36
Mamld1	48.4784	-35.3882	4.10539	-8.61994	6.69903e-18	8.51296e-17
Fam214b	48.4343	-24.1919	2.549	-9.49076	2.29362e-21	3.36309e-20
Fpgs	48.4083	-25.3977	2.60222	-9.76001	1.67137e-22	2.57992e-21
Paqr4	48.4073	-44.4991	3.85635	-11.5392	8.3712e-31	1.77528e-29
Ptpdc1	48.3289	-8.71968	1.83891	-4.74178	2.11852e-06	1.34088e-05
Tbc1d30	48.2806	-8.136	1.88933	-4.30629	1.66014e-05	9.77896e-05
Lrrc75b	48.1329	-26.1431	2.68166	-9.74885	1.86572e-22	2.87181e-21
Zfp189	48.0742	-14.8514	2.74477	-5.4108	6.27453e-08	4.46821e-07
Stard5	48.0647	-24.8159	2.52378	-9.83282	8.13092e-23	1.27064e-21
Gdpd3	47.8278	-19.8073	2.4644	-8.03738	9.17815e-16	1.05658e-14
Best1	47.8101	-25.1842	2.73493	-9.20838	3.31069e-20	4.61498e-19
Gchfr	47.8015	-19.0375	3.60902	-5.27497	1.32776e-07	9.19559e-07
Fam83b	47.5478	-25.1178	2.64219	-9.50645	1.9728e-21	2.9109e-20
Nexn	47.2925	-25.7294	1.92112	-13.3929	6.6508e-41	1.98954e-39
A630089N07Rik	47.163	-24.1682	2.40685	-10.0414	1.00221e-23	1.63151e-22
Gm19410	47.1473	-11.0738	2.50574	-4.41936	9.89934e-06	5.95741e-05
Casc1	47.1267	-22.9979	2.5566	-8.9955	2.35158e-19	3.18064e-18
2410018L13Rik	47.0101	-10.0576	1.42966	-7.03497	1.99302e-12	1.91847e-11
Swap70	46.9881	-24.4342	3.59635	-6.79416	1.08948e-11	1.00619e-10
Slc25a15	46.9168	-10.2253	2.3319	-4.38496	1.16009e-05	6.93557e-05
Lxn	46.7643	-26.6679	2.57703	-10.3483	4.26076e-25	7.36002e-24
Galr2	46.7419	-21.6055	3.41736	-6.32228	2.57734e-10	2.17442e-09
D130062J10Rik	46.7095	-25.729	2.4869	-10.3458	4.37107e-25	7.54262e-24
C630043F03Rik	46.6764	-23.1561	2.44477	-9.47168	2.7537e-21	4.009e-20
Ppil6	46.4462	-25.901	1.76573	-14.6687	1.02244e-48	4.00977e-47
Gm37258	46.3113	-26.267	2.34353	-11.2083	3.71365e-29	7.3702e-28
Tmem51os1	46.2517	-24.6575	1.98206	-12.4403	1.57821e-35	3.96805e-34
Tbc1d4	46.24	-10.5759	2.19553	-4.81702	1.45717e-06	9.29471e-06
Rpp40	46.2321	-25.2133	2.61516	-9.64123	5.3541e-22	8.03752e-21
Trim12a	46.0792	-26.3836	2.77292	-9.51473	1.82188e-21	2.69307e-20
Mcmdc2	45.8798	-25.4073	2.08438	-12.1894	3.54162e-34	8.47558e-33
B3gnt8	45.7096	-19.7506	2.21902	-8.90056	5.55642e-19	7.42956e-18
Cfp	45.6929	-11.6739	2.61006	-4.47264	7.72589e-06	4.69076e-05
Nradd	45.689	-9.53135	2.10242	-4.53351	5.80106e-06	3.56702e-05
Cd274	45.2839	-28.5511	4.38028	-6.51809	7.12073e-11	6.25228e-10
Fam221a	45.1524	-25.8287	3.3931	-7.61212	2.69633e-14	2.87954e-13
Gm14322	45.0531	-5.55237	1.35418	-4.10016	4.12858e-05	0.000234755
1700028J19Rik	44.9226	-14.756	3.33012	-4.43107	9.37684e-06	5.65335e-05
Il1rap	44.9175	-25.7939	2.52368	-10.2207	1.60134e-24	2.68964e-23
Dck	44.8293	-8.45451	2.15689	-3.91976	8.8637e-05	0.000488084
Slc29a3	44.8254	-26.2	2.37098	-11.0503	2.18471e-28	4.26357e-27
Lamb2	44.7956	-24.3669	3.02686	-8.05021	8.26538e-16	9.54858e-15
Sigirr	44.7768	-23.8846	3.15837	-7.56233	3.95922e-14	4.17386e-13
Pemt	44.7518	-24.3743	3.00484	-8.11168	4.99232e-16	5.83732e-15
Gm7805	44.4318	-8.81041	1.74152	-5.05903	4.21401e-07	2.79677e-06
Gm14038	44.2557	-23.7046	1.98863	-11.9201	9.29976e-33	2.13218e-31
Gabrg3	44.2253	-14.6314	3.39063	-4.31524	1.59433e-05	9.41154e-05
Dbn1	44.0593	-21.6653	2.7658	-7.83326	4.75368e-15	5.25116e-14
Pgf	43.2818	-22.5656	3.51408	-6.42147	1.34963e-10	1.16383e-09
Fadd	43.0421	-10.0672	1.94199	-5.18399	2.17187e-07	1.47671e-06
Asap2	42.939	-25.992	2.00973	-12.9331	2.92831e-38	7.98733e-37
Dcn	42.9375	-15.1002	3.5643	-4.23651	2.27018e-05	0.000132156
Aldh5a1	42.7177	-25.2891	1.82801	-13.8342	1.58461e-43	5.18493e-42
Nme4	42.7087	-24.2065	2.83277	-8.54515	1.28365e-17	1.61125e-16
Lacc1	42.549	-19.2067	3.7792	-5.08222	3.7304e-07	2.48992e-06
Homez	42.5171	-22.879	2.92281	-7.82774	4.96704e-15	5.47576e-14
Sun2	42.4183	-9.7251	1.93549	-5.02461	5.0446e-07	3.33049e-06
Gm48181	42.1932	-21.9538	1.92595	-11.399	4.23025e-30	8.76695e-29
Ttc38	42.0682	-26.2964	2.3392	-11.2416	2.54774e-29	5.09952e-28
Gm36757	41.9429	-32.7844	4.37997	-7.48506	7.15129e-14	7.45745e-13
Gm3336	41.8436	-24.8209	3.6298	-6.83808	8.0262e-12	7.45037e-11
Xk	41.8353	-24.479	2.76318	-8.85902	8.07233e-19	1.07323e-17
Airn	41.7885	-23.5244	2.17597	-10.811	3.05362e-27	5.7406e-26
BC025920	41.4986	-25.6561	2.20439	-11.6386	2.62191e-31	5.70039e-30
Zfp605	41.449	-25.9781	2.83197	-9.17316	4.59337e-20	6.38128e-19
Arhgef40	41.2617	-9.32268	2.42362	-3.84659	0.000119773	0.000646294
Rac3	41.2203	-24.6001	2.53148	-9.71768	2.53484e-22	3.88352e-21
1700101I11Rik	41.2087	-25.7194	2.73464	-9.40502	5.20208e-21	7.52672e-20
Nlgn2	41.1392	-23.9823	1.79301	-13.3755	8.41255e-41	2.48929e-39
Pprc1	40.8933	-19.8741	2.34886	-8.46116	2.64742e-17	3.28284e-16
Pus1	40.8918	-8.08012	1.65682	-4.87688	1.07777e-06	6.96136e-06
Rbks	40.8459	-19.2916	2.39951	-8.03981	8.99769e-16	1.03726e-14
Zbtb33	40.7213	-25.7327	2.70288	-9.52049	1.72372e-21	2.55026e-20
Hyal3	40.7152	-25.1433	2.58152	-9.73971	2.04143e-22	3.13932e-21
Gm44103	40.7067	-25.706	2.33223	-11.0221	2.99108e-28	5.80957e-27
Plekhh3	40.6482	-23.3073	2.64906	-8.79832	1.38875e-18	1.83447e-17
Gm17949	40.5874	-25.8719	3.91426	-6.60966	3.852e-11	3.4337e-10
Rps6kc1	40.5466	-25.1974	2.72095	-9.26051	2.03459e-20	2.88023e-19
Junos	40.341	-24.6515	2.33934	-10.5378	5.78348e-26	1.03957e-24
Rnf24	40.0601	-25.1088	2.39586	-10.4801	1.06651e-25	1.89829e-24
Zfp513	39.7504	-8.04634	1.95382	-4.11826	3.81746e-05	0.000217668
Cxcl16	39.679	-30.3499	2.94298	-10.3126	6.17867e-25	1.05397e-23
Grin2c	39.601	-14.8306	2.95397	-5.02058	5.15168e-07	3.39571e-06
Gm11423	39.4823	-24.95	3.15386	-7.91094	2.55454e-15	2.86042e-14
Lama2	39.3919	-15.7654	3.25078	-4.84972	1.23638e-06	7.92474e-06
Tnnt2	39.3861	-25.5135	1.93558	-13.1813	1.1238e-39	3.22636e-38
Gm48182	39.02	-22.3536	1.95699	-11.4225	3.22982e-30	6.70208e-29
Pxmp2	39.0151	-10.2619	1.86902	-5.49053	4.0072e-08	2.89256e-07
Gm6055	38.9244	-2.27337	0.604825	-3.75872	0.000170783	0.000905156
Afg1l	38.8211	-24.3826	2.49082	-9.78899	1.25547e-22	1.9508e-21
Gm9776	38.5689	-8.85448	1.64587	-5.37982	7.45583e-08	5.2728e-07
Gm44699	38.5412	-37.529	1.88127	-19.9487	1.53697e-88	2.15347e-86
Rasgrf1	38.301	-36.9075	3.22214	-11.4543	2.23673e-30	4.67688e-29
Snx20	38.2319	-14.9655	2.08498	-7.17773	7.08762e-13	6.99502e-12
Tram2	38.1119	-24.675	2.49042	-9.90795	3.84437e-23	6.11258e-22
Mocs3	37.9168	-6.99392	1.76939	-3.95272	7.7267e-05	0.000427918
Cenpj	37.6148	-25.257	2.23481	-11.3016	1.28858e-29	2.61431e-28
Tert	37.4665	-24.6292	2.88743	-8.52979	1.46617e-17	1.83473e-16
Micall1	37.3934	-25.456	1.88007	-13.5399	9.08679e-42	2.76877e-40
Snhg16	37.3137	-22.7112	2.34732	-9.67539	3.83626e-22	5.83916e-21
Npas2	37.0605	-25.8594	2.16713	-11.9326	8.00546e-33	1.84058e-31
Gm14150	36.9024	-4.57628	0.641177	-7.13731	9.51731e-13	9.34795e-12
Tmem82	36.7911	-24.6096	2.21177	-11.1267	9.30369e-29	1.83532e-27
Mansc1	36.7807	-25.0829	2.20571	-11.3718	5.77867e-30	1.18858e-28
Usp12	36.6344	-24.2195	1.90789	-12.6944	6.35412e-37	1.66928e-35
Chst5	36.5759	-26.4605	2.73758	-9.66566	4.21889e-22	6.39781e-21
Pmel	36.4957	-42.359	2.41917	-17.5097	1.20813e-68	9.0848e-67
Itpripl1	36.2064	-24.2695	2.39397	-10.1378	3.75512e-24	6.23684e-23
Pask	36.1493	-25.1946	2.55401	-9.86471	5.9206e-23	9.33235e-22
Itgb4	36.0896	-25.5755	2.82358	-9.05784	1.33061e-19	1.81772e-18
Col13a1	36.0824	-25.2889	2.79556	-9.04608	1.48193e-19	2.02108e-18
Pcdh17	36.0504	-20.7271	2.67636	-7.74449	9.59649e-15	1.04113e-13
Bicra	36.0093	-9.64335	1.73033	-5.57312	2.50216e-08	1.83198e-07
4930506C21Rik	35.7503	-22.8613	1.63264	-14.0027	1.50152e-44	5.09614e-43
Map3k20	35.6635	-25.6282	2.68855	-9.53237	1.53728e-21	2.27853e-20
Frrs1	35.6227	-11.0097	2.64422	-4.16368	3.13163e-05	0.000180256
Nmral1	35.4591	-26.7377	3.24922	-8.22895	1.88866e-16	2.24192e-15
Pcbd1	35.1683	-19.3478	2.77036	-6.98386	2.87184e-12	2.73392e-11
Pgbd5	35.1492	-21.1666	2.62333	-8.06861	7.11055e-16	8.23187e-15
Gm44045	35.1375	-25.9726	2.3698	-10.9598	5.96052e-28	1.14819e-26
Gm34455	35.057	-25.7632	2.19752	-11.7238	9.6288e-32	2.11588e-30
Nphp3	34.9847	-7.10089	1.90187	-3.73363	0.000188738	0.000993574
Aifm2	34.921	-24.2563	2.52308	-9.61377	6.99378e-22	1.04702e-20
Gm10130	34.9117	-24.4916	2.68354	-9.12659	7.06887e-20	9.74601e-19
Gm904	34.6895	-23.5421	2.68599	-8.76475	1.87194e-18	2.46281e-17
Col11a2	34.6142	-9.58992	1.94565	-4.92889	8.26961e-07	5.38165e-06
Efna2	34.5995	-25.1899	2.55054	-9.87629	5.27481e-23	8.34653e-22
Gnas	34.5192	-3.6452	0.469072	-7.77108	7.78178e-15	8.48747e-14
Tspan1	34.4541	-30.4719	4.0529	-7.51854	5.53929e-14	5.8097e-13
Ifi44	34.2434	-29.844	4.25583	-7.01249	2.34107e-12	2.24297e-11
Gm26912	34.05	-24.6667	4.21462	-5.85265	4.83811e-09	3.69577e-08
Atp10a	33.9173	-24.8977	2.51878	-9.88482	4.84449e-23	7.69532e-22
Zfp760	33.8867	-23.4014	2.42374	-9.6551	4.67714e-22	7.06007e-21
9630050E16Rik	33.8642	-9.63403	1.69839	-5.67245	1.4077e-08	1.04703e-07
6030443J06Rik	33.8004	-19.415	2.10138	-9.23914	2.48484e-20	3.49049e-19
Peli3	33.7898	-24.7709	2.76431	-8.96096	3.21869e-19	4.33915e-18
Smtn	33.767	-19.1992	2.52675	-7.59838	2.9985e-14	3.18977e-13
Adora1	33.7603	-23.3009	2.91983	-7.98023	1.46066e-15	1.65477e-14
Pdss1	33.7392	-24.358	2.27428	-10.7102	9.11663e-27	1.67732e-25
Gm17098	33.7146	-39.9697	2.39665	-16.6774	1.91522e-62	1.18476e-60
Pir	33.6969	-33.5264	3.63422	-9.2252	2.83041e-20	3.95895e-19
Apold1	33.5626	-23.9297	3.48398	-6.86849	6.48851e-12	6.06075e-11
Gm15327	33.5145	-20.8227	2.36888	-8.7901	1.49421e-18	1.9706e-17
4930556M19Rik	33.2947	-9.58942	2.55792	-3.74891	0.000177602	0.000939168
Gm3226	32.8402	-2.42518	0.567733	-4.27169	1.94001e-05	0.000113662
Zfp383	32.7706	-21.3012	3.41454	-6.23839	4.42111e-10	3.64931e-09
Nppc	32.7311	-25.2104	2.90726	-8.67154	4.2633e-18	5.48144e-17
Gm13963	32.5246	-7.53719	1.64701	-4.57629	4.73294e-06	2.93003e-05
2010109A12Rik	32.4424	-25.695	3.20796	-8.00976	1.14931e-15	1.31661e-14
Lin9	32.1759	-24.7407	3.07419	-8.04788	8.42425e-16	9.72527e-15
Gm45847	32.0764	-26.221	2.53288	-10.3522	4.08813e-25	7.06928e-24
Soga1	32.066	-17.1243	2.15685	-7.93949	2.03008e-15	2.28565e-14
Lamc1	32.0159	-20.2864	3.05313	-6.64447	3.04317e-11	2.72159e-10
Tprg	31.8236	-35.6946	4.2431	-8.41237	4.01791e-17	4.93745e-16
Pigl	31.7543	-24.5471	1.87354	-13.102	3.20683e-39	9.0481e-38
Gm49760	31.7143	-20.1214	1.93965	-10.3737	3.26512e-25	5.68811e-24
Tle6	31.6723	-23.8776	3.24653	-7.35479	1.91224e-13	1.95676e-12
Arhgef10	31.6549	-25.4892	2.88035	-8.84936	8.80207e-19	1.16741e-17
Mrm2	31.5417	-23.9507	2.68255	-8.92833	4.32505e-19	5.81151e-18
Fastkd5	31.4868	-22.3499	2.50488	-8.92251	4.55852e-19	6.11521e-18
Polh	31.116	-9.26592	1.74529	-5.30911	1.10164e-07	7.66522e-07
Smim6	30.918	-24.1774	2.38237	-10.1485	3.36613e-24	5.60213e-23
Rwdd3	30.8479	-17.5568	2.37371	-7.39635	1.39975e-13	1.44043e-12
Septin10	30.6059	-10.056	2.63928	-3.81012	0.000138897	0.000744342
Gm43445	30.128	-24.8615	2.70127	-9.20364	3.46026e-20	4.81937e-19
Zfp763	29.9959	-23.3406	4.38067	-5.32809	9.92508e-08	6.94416e-07
Pim1	29.7238	-4.78693	1.05375	-4.54274	5.55285e-06	3.4221e-05
6030400A10Rik	29.6072	-42.5334	2.97082	-14.3171	1.71179e-46	6.20828e-45
Gm11346	29.508	-16.0015	3.01054	-5.31518	1.06553e-07	7.4234e-07
Nkpd1	29.496	-15.9051	3.778	-4.20993	2.55449e-05	0.000147866
Neurod2	29.4006	-17.6219	2.47502	-7.11988	1.0802e-12	1.05341e-11
Lrp4	29.3722	-20.9518	2.89628	-7.23405	4.68814e-13	4.67759e-12
Mpl	29.3156	-32.5807	3.18487	-10.2298	1.45757e-24	2.45066e-23
Gm16016	29.1852	-24.8536	2.84663	-8.73091	2.52643e-18	3.28957e-17
Top1mt	28.9728	-25.581	3.22529	-7.93137	2.16748e-15	2.43534e-14
Ccdc62	28.9558	-8.06205	2.07007	-3.89458	9.83682e-05	0.000538414
Zfp568	28.9537	-14.7825	3.25185	-4.54589	5.47041e-06	3.37637e-05
2810032G03Rik	28.7551	-31.3347	4.38001	-7.15402	8.42745e-13	8.28741e-12
Hap1	28.7421	-24.7556	3.41895	-7.24071	4.46341e-13	4.46423e-12
Gm32815	28.3314	-20.2557	2.7626	-7.3321	2.26577e-13	2.30271e-12
Paqr3	27.9791	-35.5056	2.95004	-12.0356	2.30936e-33	5.40049e-32
4930522L14Rik	27.9619	-8.4354	2.13631	-3.94859	7.86139e-05	0.00043479
Ccnyl1	27.7623	-8.74136	1.8416	-4.74663	2.06837e-06	1.31066e-05
Haus6	27.7099	-22.521	3.32704	-6.76909	1.29593e-11	1.18949e-10
Nek3	27.4975	-24.4163	2.64409	-9.2343	2.59976e-20	3.64567e-19
Stamos	27.3938	-23.065	2.28055	-10.1138	4.79809e-24	7.91299e-23
Fzd5	27.3918	-25.5757	2.48409	-10.2958	7.36245e-25	1.252e-23
Gm43457	27.2675	-23.901	2.90151	-8.23742	1.75958e-16	2.09628e-15
Pantr2	27.2206	-19.9298	2.30365	-8.6514	5.08693e-18	6.51484e-17
Il17d	27.068	-22.6314	2.26802	-9.97848	1.89339e-23	3.03999e-22
Gm50269	27.0062	-22.5591	3.07733	-7.33072	2.28911e-13	2.32355e-12
Gm3724	26.9861	-2.63366	0.605884	-4.3468	1.38137e-05	8.19867e-05
Plxdc2	26.9563	-24.6163	3.67865	-6.69166	2.20653e-11	1.99184e-10
Ovca2	26.8523	-22.0582	2.52337	-8.74156	2.29915e-18	3.0008e-17
Irx3os	26.8405	-26.1964	2.38282	-10.9939	4.08941e-28	7.92409e-27
Gm16045	26.7472	-40.6522	2.70847	-15.0093	6.37997e-51	2.74506e-49
Ttc21a	26.6067	-23.5334	3.38747	-6.9472	3.72616e-12	3.52469e-11
Gm38393	26.5537	-24.1707	2.13818	-11.3043	1.24915e-29	2.53746e-28
Gm37706	26.3384	-21.9753	2.74696	-7.99985	1.24573e-15	1.42407e-14
Gm27151	26.259	-8.72661	1.54614	-5.64414	1.66014e-08	1.22976e-07
Gm10647	26.2305	-42.3502	2.39425	-17.6883	5.16078e-70	4.06734e-68
Wdr59	26.1022	-24.4228	2.40988	-10.1345	3.88494e-24	6.43941e-23
Zfp93	26.0285	-24.6809	3.1743	-7.77523	7.53126e-15	8.22518e-14
Gm29642	25.923	-25.3637	3.70235	-6.85069	7.3495e-12	6.8377e-11
Rtl5	25.8723	-5.81626	1.38969	-4.18529	2.84806e-05	0.000164453
Gm9800	25.8609	-2.64337	0.455483	-5.80344	6.49696e-09	4.91938e-08
Dnaic1	25.8572	-24.1984	2.39395	-10.1081	5.08405e-24	8.35936e-23
3110039M20Rik	25.849	-25.2006	2.93012	-8.60053	7.93467e-18	1.00598e-16
Scin	25.8321	-24.4359	4.33626	-5.63525	1.74809e-08	1.29316e-07
Gm43062	25.6314	-24.3269	2.09953	-11.5868	4.80768e-31	1.03428e-29
Zgrf1	25.6176	-23.4843	2.48579	-9.44743	3.47265e-21	5.04674e-20
S100a3	25.5647	-20.9196	3.92595	-5.32856	9.89966e-08	6.92934e-07
4930422I22Rik	25.5304	-8.99455	1.7246	-5.21545	1.83371e-07	1.25511e-06
Tmem144	25.4907	-21.3307	3.21224	-6.64044	3.12745e-11	2.79544e-10
Olfr1372-ps1	25.4667	-9.93521	2.38627	-4.16349	3.13427e-05	0.000180344
Lzts3	25.393	-21.4987	3.40471	-6.3144	2.71215e-10	2.28001e-09
Zik1	25.2635	-24.053	2.8043	-8.5772	9.72146e-18	1.22776e-16
Gm29443	25.2132	-25.9967	3.03387	-8.56882	1.04547e-17	1.31732e-16
Tor4a	25.1334	-25.3934	4.38003	-5.79753	6.72969e-09	5.08855e-08
Snora31	24.9661	-8.37472	1.60295	-5.22458	1.74552e-07	1.19725e-06
Gm47615	24.8265	-8.7688	2.03284	-4.31358	1.60632e-05	9.47549e-05
Zfp970	24.7714	-7.91391	1.75068	-4.52047	6.17028e-06	3.78695e-05
Rassf7	24.6148	-25.357	2.62633	-9.65492	4.68541e-22	7.06605e-21
Cenpw	24.6064	-22.9345	3.63022	-6.31765	2.65578e-10	2.23492e-09
Gm5905	24.4844	-3.3441	0.71292	-4.69071	2.72254e-06	1.70867e-05
Chpf2	24.3544	-9.71936	2.49851	-3.89006	0.00010022	0.000547272
Gm16794	24.3109	-23.2432	2.42198	-9.59676	8.24946e-22	1.23051e-20
Zdhhc9	24.1524	-24.5732	2.64468	-9.29158	1.52009e-20	2.16497e-19
3110001I22Rik	23.9611	-23.7707	3.39205	-7.00776	2.42163e-12	2.31879e-11
Lrriq3	23.7835	-31.5608	4.02715	-7.83701	4.61411e-15	5.10041e-14
Chaf1b	23.7329	-7.98446	1.74225	-4.58285	4.58681e-06	2.84278e-05
Notch3	23.7149	-14.9062	2.19271	-6.79808	1.06023e-11	9.80279e-11
Pot1b	23.6713	-24.2468	2.94391	-8.23625	1.77687e-16	2.11327e-15
Znf41-ps	23.6464	-8.46898	1.79015	-4.73088	2.23554e-06	1.41386e-05
B230317F23Rik	23.5989	-25.2864	3.90384	-6.47731	9.3372e-11	8.15476e-10
5730507A11Rik	23.559	-21.1472	2.44471	-8.6502	5.14101e-18	6.57893e-17
Gm26550	23.5443	-43.539	3.21222	-13.5542	7.48131e-42	2.28956e-40
A730011C13Rik	23.5027	-23.3869	3.04041	-7.69202	1.44834e-14	1.56201e-13
Gm13375	23.4888	-6.46045	1.70904	-3.78016	0.000156725	0.000834422
Ankrd37	23.221	-20.2076	2.73391	-7.39146	1.45228e-13	1.49262e-12
Ccpg1	23.152	-8.04249	1.62244	-4.95704	7.15746e-07	4.67646e-06
H2-Q4	23.1515	-22.621	3.78913	-5.96996	2.37313e-09	1.85959e-08
Gm44243	23.1101	-41.4571	2.02596	-20.463	4.60492e-93	7.86338e-91
Pdpn	23.0745	-26.7327	2.59834	-10.2884	7.95075e-25	1.35064e-23
Zfp607b	23.0631	-24.0672	2.96402	-8.11978	4.67021e-16	5.4763e-15
Gm15708	23.0511	-22.4856	2.39937	-9.37146	7.15359e-21	1.02999e-19
Gm38391	22.9843	-8.99369	2.28728	-3.93204	8.42265e-05	0.000464265
G630022F23Rik	22.7824	-8.41898	1.19475	-7.04666	1.83267e-12	1.76931e-11
Gm6658	22.7371	-34.6588	4.38005	-7.91288	2.51496e-15	2.81803e-14
Map7d2	22.7091	-25.3655	3.6875	-6.87879	6.03625e-12	5.64796e-11
Cd46	22.6846	-25.5313	2.92136	-8.73953	2.34088e-18	3.05283e-17
1700055D18Rik	22.5263	-25.9461	3.10954	-8.34402	7.18065e-17	8.71298e-16
Rasip1	22.3846	-7.14614	1.64787	-4.3366	1.44702e-05	8.56974e-05
Gm16166	22.3427	-23.888	3.79063	-6.30186	2.94097e-10	2.46605e-09
Rnf144b	22.0417	-23.3817	2.37718	-9.83587	7.8883e-23	1.23626e-21
4933431K14Rik	21.8591	-23.9115	3.04373	-7.85598	3.9665e-15	4.39938e-14
Gm19327	21.8194	-21.7906	2.50549	-8.69714	3.40368e-18	4.39689e-17
F830208F22Rik	21.8053	-25.7113	3.2854	-7.82592	5.03953e-15	5.54822e-14
Ptch2	21.7473	-25.3168	3.77647	-6.70382	2.03041e-11	1.8369e-10
Gm45640	21.6851	-34.6429	3.0521	-11.3505	7.37074e-30	1.50847e-28
Gm17151	21.669	-8.00856	2.03226	-3.94071	8.12399e-05	0.000449011
A930005G22Rik	21.6569	-24.0698	2.7826	-8.65011	5.14499e-18	6.57893e-17
Mycn	21.6123	-22.8025	3.4573	-6.59546	4.2393e-11	3.76462e-10
Dok4	21.5113	-15.2139	3.6823	-4.13162	3.60216e-05	0.000206037
Gm49377	21.48	-25.8888	1.72161	-15.0375	4.17004e-51	1.79893e-49
Gm44044	21.4325	-23.742	2.37209	-10.0089	1.39261e-23	2.24475e-22
Gm37183	21.3281	-21.7044	4.13638	-5.24721	1.54422e-07	1.06408e-06
Mamdc4	21.2502	-23.037	2.67962	-8.59714	8.17286e-18	1.03458e-16
Gm50464	21.2279	-24.5008	2.91655	-8.4006	4.44206e-17	5.44643e-16
Gng11	21.2245	-36.1819	3.56457	-10.1504	3.29935e-24	5.49657e-23
Morn5	21.0278	-21.7079	3.31418	-6.54998	5.75441e-11	5.07434e-10
Igtp	20.8941	-9.74866	2.39844	-4.06459	4.81178e-05	0.000271811
Grk4	20.8733	-19.2691	2.99761	-6.42815	1.29163e-10	1.11499e-09
Pla2g15	20.8451	-15.7555	4.1131	-3.83058	0.000127842	0.000687797
Gm13831	20.8345	-9.32525	1.91415	-4.87175	1.10615e-06	7.13496e-06
Gm11696	20.8294	-24.1567	3.41677	-7.07002	1.54908e-12	1.49906e-11
Gm10226	20.7885	-22.304	2.58498	-8.6283	6.22702e-18	7.92543e-17
B230208H11Rik	20.7437	-23.579	3.19302	-7.38456	1.52962e-13	1.57112e-12
Nalcn	20.7401	-22.8805	2.58464	-8.85248	8.55995e-19	1.13622e-17
Alpk1	20.6637	-21.9135	2.34965	-9.32629	1.09646e-20	1.56981e-19
Eef1akmt4	20.6035	-23.4571	2.59458	-9.04079	1.55547e-19	2.11608e-18
Dipk1a	20.3766	-24.9304	3.06605	-8.13113	4.25301e-16	4.99782e-15
3300002I08Rik	20.3347	-10.1031	2.25669	-4.47695	7.57177e-06	4.60469e-05
Gstcd	20.3234	-24.7165	2.37649	-10.4004	2.46823e-25	4.32282e-24
Gm12602	20.3195	-39.6897	2.6549	-14.9496	1.56596e-50	6.56543e-49
Gm11737	20.2146	-22.8124	2.26743	-10.0609	8.22549e-24	1.34571e-22
Gbp6	20.1936	-28.1268	4.18531	-6.72036	1.81279e-11	1.64547e-10
Ptgds	20.1575	-25.5043	2.92457	-8.7207	2.76482e-18	3.58574e-17
Lrrc19	19.9319	-15.8828	2.87413	-5.52614	3.27357e-08	2.3766e-07
1010001B22Rik	19.8281	-21.8345	3.15262	-6.92583	4.33437e-12	4.08822e-11
2810455O05Rik	19.823	-23.1393	2.34455	-9.86939	5.65046e-23	8.92371e-22
Pip5k1b	19.7832	-21.8471	2.95309	-7.39806	1.38192e-13	1.42298e-12
9930104L06Rik	19.6961	-20.8133	2.62212	-7.93758	2.06164e-15	2.3196e-14
Piezo1	19.5279	-24.3024	2.53483	-9.58738	9.03459e-22	1.3464e-20
Kdm8	19.498	-22.6396	2.34759	-9.64372	5.2257e-22	7.85195e-21
Gm14418	19.1477	-6.50667	1.58713	-4.09966	4.13762e-05	0.000235187
Gm11437	19.0153	-36.2783	3.61552	-10.0341	1.07988e-23	1.75271e-22
Dusp4	18.8716	-24.8962	3.20969	-7.75659	8.72432e-15	9.47137e-14
Gm19181	18.8339	-24.1329	3.38328	-7.13297	9.82264e-13	9.63053e-12
Gm11827	18.7163	-37.6545	3.59668	-10.4692	1.19618e-25	2.12448e-24
Cd72	18.6962	-27.845	3.28056	-8.48787	2.10455e-17	2.62556e-16
Gm17835	18.6502	-32.3978	4.09135	-7.9186	2.40196e-15	2.6951e-14
Cyb5r2	18.5347	-35.4749	3.58987	-9.88194	4.98566e-23	7.9119e-22
Gm3791	18.501	-25.432	3.45968	-7.35098	1.96753e-13	2.01083e-12
Rbp1	18.1927	-18.003	3.95665	-4.55005	5.36334e-06	3.31278e-05
Fam184b	18.148	-22.8762	3.38371	-6.76068	1.37344e-11	1.25781e-10
Arid3a	18.1161	-22.5356	2.62386	-8.58872	8.79458e-18	1.11242e-16
Sec22c	18.1034	-21.9929	3.3661	-6.53362	6.41983e-11	5.64593e-10
4933431E20Rik	18.0627	-24.8888	3.40323	-7.31328	2.60697e-13	2.63478e-12
Gm47817	17.9249	-20.8088	2.3804	-8.74175	2.2952e-18	2.99802e-17
0610040J01Rik	17.8329	-20.4377	3.19777	-6.39123	1.64555e-10	1.40864e-09
A930019D19Rik	17.6918	-20.018	3.48276	-5.74774	9.04421e-09	6.77923e-08
Gm17655	17.6815	-9.00055	2.08774	-4.31115	1.62405e-05	9.57665e-05
4930549G23Rik	17.4483	-18.2991	2.97294	-6.15521	7.4977e-10	6.12101e-09
Camk4	17.2651	-22.9828	2.57485	-8.9259	4.42078e-19	5.93529e-18
Tap2	17.2305	-20.1095	3.32324	-6.05117	1.43797e-09	1.14541e-08
Sorcs1	17.0683	-20.9256	4.22174	-4.95664	7.17221e-07	4.68422e-06
1700120O09Rik	16.9073	-16.4887	3.74469	-4.40322	1.06657e-05	6.39513e-05
Gm47513	16.8712	-39.6149	3.01667	-13.132	2.15917e-39	6.13436e-38
Gm5129	16.871	-35.1586	3.2692	-10.7545	5.64499e-27	1.04919e-25
1810021B22Rik	16.8531	-24.061	3.09538	-7.77318	7.65394e-15	8.35359e-14
Fn3krp	16.8325	-8.15951	1.70927	-4.77368	1.8089e-06	1.14846e-05
Dhx35	16.7814	-15.2062	2.48818	-6.11135	9.87888e-10	7.96187e-09
4921511C10Rik	16.7549	-30.6462	4.3801	-6.99668	2.62104e-12	2.50243e-11
Psenen-ps	16.7435	-3.69906	0.537014	-6.8882	5.65016e-12	5.2988e-11
Kcnh6	16.7378	-20.9896	4.0586	-5.17163	2.32056e-07	1.57454e-06
Gm48194	16.723	-20.3977	3.65059	-5.58752	2.30336e-08	1.68944e-07
Gm49284	16.7089	-23.7825	2.76578	-8.59883	8.05355e-18	1.02026e-16
Gm10059	16.6949	-4.30821	0.85345	-5.04799	4.46475e-07	2.9572e-06
Gm16124	16.6768	-24.6608	3.64862	-6.75893	1.39013e-11	1.27238e-10
Adgre5	16.6631	-25.3752	3.01145	-8.42625	3.56922e-17	4.40921e-16
Cetn4	16.4578	-22.138	3.34758	-6.61315	3.76229e-11	3.35557e-10
Gm9895	16.3899	-30.278	3.0989	-9.77057	1.50608e-22	2.33356e-21
Gm4032	16.2685	-25.0051	2.73258	-9.15073	5.655e-20	7.82298e-19
Gm10101	16.198	-35.152	4.38019	-8.02521	1.01356e-15	1.16435e-14
Hspa1a	16.1352	-15.3055	3.81022	-4.01697	5.89518e-05	0.000330054
Ccdc142os	16.1335	-24.6153	2.77544	-8.86897	7.38288e-19	9.83964e-18
Ssc4d	16.1078	-25.3421	2.98642	-8.48578	2.14283e-17	2.66925e-16
Tdg-ps2	16.0364	-15.2801	2.29267	-6.66475	2.65124e-11	2.38408e-10
Fam161b	16.0354	-8.86433	2.27106	-3.90317	9.49405e-05	0.000521261
Rpl17-ps8	16.014	-2.20654	0.584147	-3.77737	0.000158495	0.0008433
Gm49699	16.0071	-24.0231	2.87431	-8.35786	6.38657e-17	7.75519e-16
Trabd2b	15.9452	-25.6688	3.3948	-7.56121	3.99328e-14	4.20706e-13
Gm37052	15.8887	-22.8658	3.67647	-6.21948	4.98796e-10	4.10274e-09
Rpl23a-ps3	15.8786	-2.43301	0.375644	-6.47691	9.36223e-11	8.16791e-10
Xylb	15.8731	-23.9394	3.40533	-7.02998	2.06556e-12	1.98364e-11
Pcdhgc3	15.7279	-9.47793	2.53225	-3.74288	0.000181922	0.000960466
Prickle1	15.7268	-19.6555	3.26933	-6.01208	1.83162e-09	1.44772e-08
Castor1	15.6776	-30.2934	4.38012	-6.91611	4.64211e-12	4.37095e-11
Notch2	15.6716	-7.94245	1.67938	-4.72941	2.25179e-06	1.42358e-05
Fam177a2	15.5757	-3.78528	0.645315	-5.86579	4.47003e-09	3.42417e-08
Klhl13	15.4222	-24.3887	4.38012	-5.56804	2.57619e-08	1.88282e-07
Gm14820	15.417	-28.1449	4.12644	-6.82061	9.06523e-12	8.40533e-11
D930048N14Rik	15.4052	-35.9548	4.38093	-8.2071	2.26587e-16	2.68578e-15
Tnfrsf23	15.2973	-22.0272	3.12967	-7.03819	1.94751e-12	1.87577e-11
Gm49221	15.265	-23.7389	3.35856	-7.0682	1.56962e-12	1.51804e-11
Gm34655	15.2327	-24.7206	3.04745	-8.11191	4.98298e-16	5.83055e-15
Gm26813	15.2136	-18.9857	2.97238	-6.38739	1.68739e-10	1.44371e-09
Trpv4	15.204	-19.5687	2.96602	-6.59761	4.17846e-11	3.7126e-10
Gm49326	15.1739	-7.88411	1.01223	-7.78888	6.76064e-15	7.41816e-14
Gm10617	15.158	-22.4921	3.66202	-6.14199	8.14926e-10	6.63311e-09
Zfp951	15.0346	-15.414	3.75222	-4.10795	3.9918e-05	0.000227293
Gm13830	14.9964	-25.3348	2.7449	-9.22979	2.71163e-20	3.7993e-19
Fstl3	14.8894	-8.94158	2.25068	-3.97283	7.10224e-05	0.000394935
Tet1	14.8846	-32.5246	3.97532	-8.18162	2.80061e-16	3.30767e-15
Ulk4	14.8057	-21.1357	3.39682	-6.2222	4.90234e-10	4.03434e-09
Gm17971	14.7947	-22.9689	3.14144	-7.3116	2.63987e-13	2.66638e-12
Gm20681	14.7942	-23.7125	2.5586	-9.26776	1.90091e-20	2.70031e-19
Gm45413	14.7941	-20.2832	2.76586	-7.33341	2.24365e-13	2.28307e-12
4930533B01Rik	14.7919	-21.614	2.79976	-7.71997	1.16359e-14	1.25823e-13
Rnaset2a	14.6569	-19.9094	3.18373	-6.25348	4.01404e-10	3.33176e-09
Tkfc	14.5272	-8.44628	1.93325	-4.36896	1.24838e-05	7.44171e-05
Gm11520	14.466	-29.8671	4.38498	-6.81123	9.67695e-12	8.96745e-11
Gm15541	14.2889	-22.9584	3.06363	-7.49383	6.68932e-14	6.9935e-13
Ninj2	14.1567	-30.2065	3.56552	-8.47184	2.41538e-17	2.99965e-16
Gm7665	14.1263	-22.303	2.12221	-10.5093	7.82364e-26	1.40014e-24
Gm23604	14.0723	-8.03528	1.77087	-4.53748	5.69315e-06	3.50198e-05
Gm42690	14.0308	-21.8556	3.60867	-6.05643	1.3918e-09	1.10918e-08
4831440D22Rik	13.9828	-23.72	2.72612	-8.70103	3.28894e-18	4.25202e-17
AL928616.1	13.9628	-24.3682	3.21263	-7.5851	3.32227e-14	3.52049e-13
Crtap	13.9325	-33.7433	3.67958	-9.17044	4.71104e-20	6.53399e-19
Piga	13.8869	-22.9862	3.13109	-7.34126	2.11588e-13	2.15841e-12
C2	13.8673	-8.13441	1.96731	-4.13479	3.55272e-05	0.00020328
Gm45435	13.8482	-22.8049	3.04466	-7.49013	6.8804e-14	7.1841e-13
Abhd3	13.7527	-16.0483	3.17611	-5.0528	4.35378e-07	2.88603e-06
Zfp808	13.7372	-25.1114	2.31512	-10.8467	2.06738e-27	3.90894e-26
Gm15634	13.7182	-24.1337	2.89933	-8.3239	8.51168e-17	1.02673e-15
Abi3bp	13.713	-24.274	2.71337	-8.94606	3.68385e-19	4.95401e-18
Gm43289	13.6719	-28.0302	4.38015	-6.39938	1.56011e-10	1.34111e-09
Calr3	13.6414	-24.7972	3.69296	-6.71472	1.88424e-11	1.70843e-10
Rps15a-ps5	13.5235	-4.64141	0.732753	-6.33421	2.38566e-10	2.02109e-09
Cidec	13.5084	-23.6154	3.95409	-5.9724	2.33782e-09	1.8328e-08
4933406C10Rik	13.4422	-24.7516	3.66747	-6.74894	1.4893e-11	1.35936e-10
4930451G09Rik	13.3574	-23.2965	2.76729	-8.41852	3.81273e-17	4.69941e-16
Gm43172	13.2919	-40.8732	4.39602	-9.29778	1.43413e-20	2.04611e-19
Ptpn5	13.2578	-36.4997	4.38016	-8.33297	7.88387e-17	9.54507e-16
Zpbp	13.2467	-19.5975	2.54984	-7.68578	1.52067e-14	1.63679e-13
Xaf1	13.1614	-29.9169	4.29622	-6.96355	3.31815e-12	3.146e-11
Gm49172	13.117	-27.9749	3.54388	-7.89386	2.92988e-15	3.26954e-14
Gm25047	13.0461	-27.7817	4.08338	-6.80361	1.02028e-11	9.44941e-11
Gk5	12.9672	-23.8898	3.37433	-7.07988	1.44278e-12	1.3995e-11
Apbb1ip	12.9653	-40.0559	3.22056	-12.4376	1.63431e-35	4.10279e-34
Myh15	12.7721	-32.1406	4.38017	-7.33777	2.17189e-13	2.21279e-12
Zfp229	12.5676	-23.1325	3.24179	-7.13571	9.62877e-13	9.4461e-12
Pp2d1	12.4947	-23.2501	3.81964	-6.08699	1.15054e-09	9.22289e-09
Gm23864	12.429	-23.9565	3.0218	-7.92791	2.22868e-15	2.50238e-14
BC049352	12.4041	-28.2709	4.38018	-6.4543	1.08724e-10	9.4452e-10
Teddm2	12.2319	-8.17505	1.80166	-4.5375	5.69241e-06	3.50198e-05
Fancb	12.2216	-19.8733	3.34124	-5.94787	2.71655e-09	2.11757e-08
Gm49330	12.1694	-7.54963	1.39562	-5.40951	6.31985e-08	4.49658e-07
Gm29361	12.0977	-25.3449	4.38021	-5.78624	7.19776e-09	5.42746e-08
Sh3bp2	12.0155	-22.47	3.35602	-6.69543	2.15032e-11	1.94323e-10
Gm4617	11.9782	-4.01066	0.683349	-5.86913	4.38089e-09	3.3606e-08
Gm42725	11.9271	-22.3956	3.16234	-7.08199	1.42103e-12	1.37921e-11
Lyrm7	11.9235	-21.5998	3.76294	-5.74014	9.4599e-09	7.07787e-08
Thtpa	11.8621	-22.7706	4.25149	-5.35592	8.51232e-08	5.98638e-07
Lrrn4cl	11.8171	-37.3622	3.65211	-10.2303	1.45053e-24	2.44133e-23
Izumo1	11.8092	-14.9596	3.23887	-4.61879	3.85992e-06	2.40318e-05
Adcy10	11.8005	-22.8032	3.26549	-6.98309	2.88767e-12	2.74739e-11
Gm18422	11.7479	-36.3268	4.3802	-8.2934	1.1006e-16	1.31983e-15
Rab27a	11.7176	-30.7458	4.04883	-7.59375	3.10771e-14	3.30381e-13
Rasl11a	11.7035	-35.4791	4.38021	-8.09986	5.50206e-16	6.41959e-15
Gm8186	11.7025	-5.22997	0.870686	-6.00673	1.893e-09	1.49192e-08
Gm37935	11.5795	-24.2734	4.3802	-5.54164	2.9966e-08	2.18423e-07
5430403G16Rik	11.5711	-18.2887	2.66429	-6.86437	6.67876e-12	6.23491e-11
Arl4d	11.4499	-24.3217	4.06619	-5.98146	2.21141e-09	1.73702e-08
Gm43737	11.4373	-27.6324	4.02776	-6.8605	6.86179e-12	6.40166e-11
AI506816	11.3317	-23.6569	3.53556	-6.69112	2.21476e-11	1.99706e-10
Gm45555	11.2963	-24.6483	4.38021	-5.62721	1.83146e-08	1.35179e-07
Gm20472	11.2903	-24.46	2.91163	-8.40081	4.43397e-17	5.44057e-16
Pde8b	11.1858	-22.1429	2.47279	-8.95465	3.40819e-19	4.59084e-18
Gm43339	11.0813	-24.6173	4.20778	-5.85043	4.90304e-09	3.74188e-08
Gprc5a	11.0273	-23.4042	4.38027	-5.3431	9.13679e-08	6.41179e-07
Slc35d2	10.8347	-37.8118	3.21929	-11.7454	7.45567e-32	1.65387e-30
Spata5l1	10.8238	-20.688	4.38522	-4.71767	2.38562e-06	1.50413e-05
Tmem177	10.8176	-31.4893	4.38022	-7.18899	6.52732e-13	6.4615e-12
Sfxn5	10.7766	-23.532	2.25285	-10.4454	1.53784e-25	2.71366e-24
Dnajc28	10.7681	-22.2824	4.38148	-5.08559	3.66482e-07	2.44914e-06
Gm14964	10.6739	-20.2952	3.18919	-6.36376	1.96879e-10	1.68008e-09
D830036C21Rik	10.5499	-28.5721	3.4301	-8.32983	8.0959e-17	9.79455e-16
Rps12-ps9	10.5293	-4.27696	0.759289	-5.63285	1.77258e-08	1.3101e-07
Gpr171	10.4865	-21.6894	3.56134	-6.09025	1.12737e-09	9.04597e-09
Gm49474	10.3301	-37.1935	4.3825	-8.48684	2.12339e-17	2.64705e-16
Cd59a	10.3009	-19.3484	3.30052	-5.86223	4.56695e-09	3.49677e-08
Olfr482	10.2635	-4.14848	0.423065	-9.80578	1.06318e-22	1.65672e-21
Gm17249	10.1978	-24.2478	4.1874	-5.79066	7.01113e-09	5.28916e-08
4930513N20Rik	10.165	-22.6539	3.61844	-6.26067	3.83317e-10	3.1897e-09
Gm45797	10.1642	-21.3944	4.13535	-5.17355	2.29686e-07	1.55911e-06
Ears2	10.1353	-20.9164	3.29117	-6.3553	2.08024e-10	1.77058e-09
3222401L13Rik	10.0527	-38.2074	4.38027	-8.72261	2.71855e-18	3.53329e-17
Gm3435	10.0494	-6.40193	1.6689	-3.83601	0.000125048	0.00067365
Zfp39	10.0472	-20.9956	3.72099	-5.64248	1.67621e-08	1.24111e-07
Gm16246	9.9127	-21.6855	4.38374	-4.9468	7.54433e-07	4.92138e-06
Cdk19os	9.90448	-26.969	3.10332	-8.69038	3.61232e-18	4.65541e-17
Dubr	9.89656	-22.2185	3.56051	-6.24026	4.36834e-10	3.60992e-09
Tmem88	9.86217	-22.6112	3.28536	-6.88241	5.88478e-12	5.51252e-11
Rbl1	9.83462	-24.3163	3.89615	-6.2411	4.34491e-10	3.59547e-09
Plekhd1os	9.82651	-37.4773	4.3327	-8.64987	5.15575e-18	6.58754e-17
Gm3756	9.75845	-2.83089	0.489469	-5.78359	7.31216e-09	5.50612e-08
Ncapg2	9.68686	-20.9651	4.36877	-4.79885	1.59578e-06	1.0167e-05
Oas1a	9.6422	-28.0068	4.38026	-6.39386	1.61745e-10	1.38713e-09
Arhgap29	9.59851	-20.7436	2.84966	-7.27934	3.35469e-13	3.37565e-12
Ntf5	9.57556	-43.3379	3.11654	-13.9058	5.84399e-44	1.93146e-42
Gm15344	9.52417	-21.0645	2.94605	-7.15006	8.67376e-13	8.52452e-12
Gm11821	9.51572	-27.2133	4.38027	-6.2127	5.20812e-10	4.27954e-09
8030442B05Rik	9.50115	-26.7705	4.38026	-6.11163	9.86189e-10	7.956e-09
Ajap1	9.39953	-27.1871	4.38027	-6.20673	5.40975e-10	4.44077e-09
9330162012Rik	9.31388	-21.6209	4.01276	-5.38803	7.12352e-08	5.04868e-07
Gm37423	9.30747	-24.031	3.58557	-6.70214	2.05386e-11	1.85708e-10
Gm49463	9.29915	-24.1059	3.66369	-6.57968	4.71469e-11	4.17322e-10
Irf7	9.18832	-24.278	4.31323	-5.62872	1.81552e-08	1.34063e-07
Gstt2	9.17009	-24.8258	3.91048	-6.34852	2.17402e-10	1.84753e-09
Gm8221	9.15087	-27.6179	4.38028	-6.30505	2.88106e-10	2.41706e-09
Cdc42ep5	9.13942	-33.6793	3.9581	-8.50897	1.75479e-17	2.19256e-16
Tmem140	9.02962	-23.549	2.26548	-10.3947	2.61997e-25	4.57392e-24
Gm43372	9.02688	-24.2436	4.30373	-5.63317	1.76927e-08	1.30824e-07
Gm6548	9.01019	-24.8073	3.97684	-6.23794	4.43374e-10	3.65789e-09
Trim12c	8.9551	-24.2642	4.38032	-5.53937	3.0356e-08	2.20971e-07
Cercam	8.89031	-46.7039	3.18516	-14.663	1.11311e-48	4.35495e-47
Lag3	8.85442	-31.6837	4.38029	-7.23323	4.71627e-13	4.70279e-12
Gm45094	8.83045	-22.4585	4.38122	-5.12608	2.95832e-07	1.99161e-06
Vcp-rs	8.81239	-2.7538	0.450432	-6.11369	9.73542e-10	7.86559e-09
Klhdc9	8.80848	-23.0959	4.10579	-5.62521	1.85281e-08	1.36631e-07
Slc10a7	8.70322	-15.3847	2.5752	-5.97416	2.31283e-09	1.81495e-08
Galnt4	8.69696	-24.2381	3.19582	-7.5843	3.34298e-14	3.54015e-13
Morf4l1-ps1	8.65434	-2.39087	0.456823	-5.23369	1.66161e-07	1.14255e-06
Ccdc13	8.64444	-24.6611	3.9691	-6.21327	5.18926e-10	4.26618e-09
Gm37718	8.61963	-19.5289	2.31891	-8.4216	3.71373e-17	4.58083e-16
4930513N10Rik	8.61913	-26.3233	4.3803	-6.00948	1.86125e-09	1.46831e-08
Irak3	8.60938	-23.917	4.40949	-5.42399	5.82828e-08	4.15947e-07
1810062O18Rik	8.57755	-24.1417	3.33533	-7.23818	4.54743e-13	4.54549e-12
Gm9484	8.57309	-40.4963	4.38075	-9.24414	2.37133e-20	3.33676e-19
Poglut3	8.49804	-29.7427	4.38274	-6.78631	1.15035e-11	1.06121e-10
Arhgef26	8.49088	-24.7057	3.09408	-7.98481	1.40735e-15	1.59659e-14
Iqsec2	8.38528	-16.349	2.99361	-5.46129	4.72682e-08	3.39408e-07
Nrros	8.3348	-23.2443	3.80151	-6.1145	9.68586e-10	7.82941e-09
Gm12406	8.3021	-23.9922	3.90149	-6.1495	7.77295e-10	6.34256e-09
Rgma	8.29984	-38.1403	2.73331	-13.9539	2.97984e-44	1.00305e-42
Mob3a	8.23038	-22.8784	3.46615	-6.60051	4.09758e-11	3.64667e-10
Gm15413	8.17625	-23.606	3.1812	-7.42046	1.16715e-13	1.20714e-12
Gm39326	8.14846	-17.6758	2.56873	-6.88114	5.93768e-12	5.55891e-11
Gm37864	8.13048	-32.6885	4.38055	-7.46219	8.50979e-14	8.84598e-13
Fam83e	8.11598	-23.2537	3.19118	-7.28688	3.17226e-13	3.19624e-12
4930593A02Rik	8.05349	-24.243	4.09373	-5.92199	3.18075e-09	2.46651e-08
Gm13827	8.01038	-29.7161	4.38033	-6.78399	1.16904e-11	1.07602e-10
Gm37019	7.99892	-30.0049	4.38033	-6.84991	7.38979e-12	6.87129e-11
Setmar	7.88992	-20.3522	3.96343	-5.13501	2.82136e-07	1.90175e-06
Cep72	7.88598	-23.0639	2.97128	-7.76226	8.34317e-15	9.06359e-14
Crygd	7.84974	-34.2939	4.38035	-7.82903	4.9165e-15	5.4237e-14
Gm49328	7.7948	-7.33551	1.46851	-4.99522	5.87695e-07	3.85407e-06
Copz2	7.77199	-24.0923	4.02091	-5.99175	2.07601e-09	1.63223e-08
Gm28187	7.72667	-31.5296	4.38035	-7.19796	6.11214e-13	6.05416e-12
Chst12	7.63172	-26.9194	4.38035	-6.14549	7.97189e-10	6.49519e-09
2010016I18Rik	7.61973	-48.2128	4.12087	-11.6997	1.27963e-31	2.80442e-30
Gm13502	7.59735	-5.42726	1.05144	-5.16175	2.44646e-07	1.65719e-06
Gm43868	7.5175	-27.4202	4.38036	-6.25981	3.8544e-10	3.20412e-09
Gpi-ps	7.50584	-6.51384	0.813361	-8.00855	1.16067e-15	1.32869e-14
Gm4356	7.45392	-21.8422	2.73428	-7.9883	1.36814e-15	1.55642e-14
Gm21814	7.33718	-29.6546	4.38038	-6.76986	1.28908e-11	1.18386e-10
Vwa1	7.33126	-21.8251	4.40055	-4.95962	7.06298e-07	4.61657e-06
Degs2	7.32751	-24.0634	4.38037	-5.49346	3.94137e-08	2.84881e-07
Tsnaxip1	7.31766	-23.8335	4.3805	-5.44082	5.30354e-08	3.79158e-07
Scp2-ps2	7.2939	-2.16036	0.498958	-4.32975	1.4928e-05	8.82812e-05
Gad1	7.21164	-31.0392	4.38038	-7.08596	1.38088e-12	1.34104e-11
Fut4	7.17782	-22.8949	4.38149	-5.22538	1.73802e-07	1.19261e-06
Pkp1	7.13735	-22.3974	4.38184	-5.11141	3.19763e-07	2.14743e-06
Tsix	7.09681	-23.7546	3.26956	-7.26538	3.7198e-13	3.7273e-12
Speg	7.00998	-36.6704	3.74863	-9.78234	1.34072e-22	2.07932e-21
Gm49628	6.94306	-18.4912	4.40304	-4.19964	2.67334e-05	0.000154582
Cenpa	6.86754	-34.1672	4.38041	-7.79999	6.19102e-15	6.80224e-14
Arpin	6.8644	-30.994	4.38041	-7.07559	1.4881e-12	1.44175e-11
Hadhb-ps	6.82222	-2.89208	0.539225	-5.3634	8.1672e-08	5.75074e-07
Osbpl10	6.72778	-20.9687	3.35199	-6.25561	3.95968e-10	3.28996e-09
Gm38251	6.7211	-23.8785	3.07443	-7.7668	8.04927e-15	8.76173e-14
Zfp764	6.69423	-29.9294	4.38239	-6.82948	8.52246e-12	7.90655e-11
Gm23887	6.68714	-26.8573	4.38042	-6.13121	8.72105e-10	7.08094e-09
Gm44624	6.66657	-23.7566	4.08748	-5.81205	6.17139e-09	4.67719e-08
Nxf7	6.64837	-26.3315	4.38042	-6.01117	1.84185e-09	1.4551e-08
Gm10335	6.64547	-2.37918	0.407533	-5.83802	5.28256e-09	4.02402e-08
2610037D02Rik	6.60974	-23.7046	3.55009	-6.6772	2.43546e-11	2.19366e-10
Gm43571	6.56406	-31.3499	4.38043	-7.15681	8.25763e-13	8.13017e-12
Zbtb16	6.51457	-26.78	4.38043	-6.11354	9.74428e-10	7.86887e-09
Gm13448	6.48949	-28.5715	4.38044	-6.52253	6.91317e-11	6.07329e-10
Gm41492	6.3615	-28.3552	4.04277	-7.01382	2.31892e-12	2.22304e-11
Gm43681	6.36033	-30.4331	4.39296	-6.92771	4.27717e-12	4.03659e-11
Tubb4b-ps1	6.34522	-2.33404	0.479209	-4.87061	1.11252e-06	7.17167e-06
Gm43378	6.3407	-17.1763	4.40949	-3.89531	9.80725e-05	0.000537154
Gm24277	6.32051	-26.9314	4.38045	-6.14809	7.84226e-10	6.39593e-09
Gm6682	6.31502	-3.52482	0.673983	-5.22984	1.69656e-07	1.16562e-06
4921516A02Rik	6.27213	-30.9417	4.14542	-7.46408	8.38812e-14	8.72503e-13
Gm43290	6.27183	-21.9967	3.61666	-6.08204	1.18666e-09	9.49853e-09
Rsl1	6.24976	-17.4513	4.40949	-3.95766	7.56876e-05	0.000419739
Gm2415	6.24169	-7.20038	1.48714	-4.84177	1.28685e-06	8.23396e-06
1700019L13Rik	6.18951	-23.3467	3.07941	-7.58154	3.41465e-14	3.61371e-13
Dcdc2b	6.18662	-33.9051	4.38066	-7.7397	9.96482e-15	1.08038e-13
Rhod	6.16144	-26.3155	4.38047	-6.00748	1.88435e-09	1.48582e-08
Gm29966	6.15469	-23.4764	4.38047	-5.35933	8.3532e-08	5.87699e-07
Ddo	6.10685	-26.7388	4.38047	-6.10409	1.03386e-09	8.30789e-09
Gm43138	6.05656	-15.4009	3.77263	-4.08228	4.45957e-05	0.000252524
Zfp389	6.05034	-18.8042	4.34122	-4.33156	1.4806e-05	8.76224e-05
Pik3c2g	6.00664	-26.7317	4.38048	-6.10245	1.04456e-09	8.38973e-09
Wbscr25	5.91454	-21.2732	3.02498	-7.0325	2.02869e-12	1.94937e-11
Gm44220	5.90863	-27.9781	4.38049	-6.38698	1.69195e-10	1.44685e-09
Gm37022	5.90059	-32.6814	4.38049	-7.46066	8.60914e-14	8.93791e-13
Parvaos	5.89365	-27.3459	4.38049	-6.24266	4.30181e-10	3.5634e-09
Gm7160	5.88534	-17.1427	4.40949	-3.88768	0.000101209	0.000552303
Cenpp	5.83241	-23.2506	4.00796	-5.80111	6.58756e-09	4.98338e-08
Ap4m1	5.8286	-26.8306	4.38111	-6.12414	9.11748e-10	7.38818e-09
Gm10603	5.81537	-23.5182	4.03114	-5.83412	5.40743e-09	4.11341e-08
Gpr45	5.81453	-17.2898	4.39287	-3.93588	8.28925e-05	0.00045722
F830112A20Rik	5.81287	-22.9541	4.38075	-5.23977	1.60778e-07	1.10695e-06
Gm16209	5.79007	-23.489	2.1446	-10.9527	6.45297e-28	1.24014e-26
Sdr42e1	5.76006	-37.9599	4.38072	-8.66522	4.50642e-18	5.78948e-17
Gm20404	5.64158	-28.0087	4.38059	-6.39382	1.61788e-10	1.38713e-09
Rab11b-ps2	5.59475	-3.76653	0.855131	-4.40462	1.05967e-05	6.36076e-05
Gm10699	5.58762	-26.6659	4.38053	-6.08737	1.14784e-09	9.20574e-09
Gng3	5.57584	-21.0022	3.83734	-5.47313	4.42155e-08	3.18185e-07
Slc3a1	5.51407	-23.138	3.93163	-5.88509	3.97842e-09	3.0583e-08
Gm3734	5.44646	-41.6651	4.38079	-9.51087	1.89072e-21	2.79231e-20
Gm37736	5.43851	-23.6464	4.38054	-5.39805	6.73704e-08	4.78511e-07
Gm47071	5.31177	-18.9353	3.45506	-5.48046	4.24218e-08	3.05721e-07
Gm20274	5.29817	-22.3078	4.38163	-5.09122	3.55771e-07	2.38047e-06
Thnsl2	5.28596	-27.8675	4.38056	-6.36164	1.99614e-10	1.70254e-09
Gm49700	5.27886	-23.4558	3.42753	-6.84336	7.73552e-12	7.18868e-11
Xlr3a	5.26787	-24.3915	4.40949	-5.5316	3.17317e-08	2.30677e-07
2700078F05Rik	5.25264	-23.5629	4.38067	-5.37884	7.4966e-08	5.29706e-07
B230369F24Rik	5.22854	-31.6026	4.38057	-7.21427	5.42228e-13	5.39693e-12
Gm13561	5.22568	-6.67198	1.08729	-6.13632	8.44549e-10	6.864e-09
Gm38248	5.21089	-26.2407	4.38058	-5.99024	2.09535e-09	1.64665e-08
Gm12166	5.18808	-3.28441	0.879045	-3.73634	0.00018672	0.000983895
D230030E09Rik	5.12595	-27.2675	4.38058	-6.22462	4.82721e-10	3.97651e-09
Gm38309	5.11846	-22.0712	3.42026	-6.45308	1.09603e-10	9.51652e-10
Gm8783	5.10992	-4.02404	0.719879	-5.58989	2.27217e-08	1.66731e-07
Dnajb5	5.06438	-26.0973	4.38733	-5.94834	2.70883e-09	2.11255e-08
A830008E24Rik	5.05912	-27.4312	4.38059	-6.26198	3.80121e-10	3.16471e-09
Gimap9	4.99957	-37.1246	4.24555	-8.74435	2.24299e-18	2.93217e-17
Hykk	4.9953	-24.0836	4.38141	-5.49677	3.86803e-08	2.79778e-07
Gm2822	4.96874	-29.266	4.38069	-6.68069	2.37822e-11	2.14327e-10
Fam177a	4.94222	-3.69043	0.712531	-5.17933	2.2269e-07	1.5135e-06
Cox4i2	4.93728	-21.454	3.23381	-6.63428	3.26085e-11	2.9115e-10
Arhgap33os	4.90405	-28.3484	4.38061	-6.47134	9.71405e-11	8.46134e-10
Rps15a-ps3	4.87263	-4.37916	0.614507	-7.12629	1.0311e-12	1.00732e-11
Gm14335	4.86321	-19.4897	4.39105	-4.4385	9.05892e-06	5.46972e-05
Tyw3	4.82247	-19.857	4.38961	-4.52364	6.07861e-06	3.73488e-05
Rnu12	4.76178	-26.8582	4.38064	-6.13113	8.7259e-10	7.08137e-09
Dleu2	4.72568	-34.4273	4.38247	-7.8557	3.9756e-15	4.40649e-14
2310002F09Rik	4.67946	-26.4807	4.38065	-6.04492	1.4948e-09	1.18895e-08
Gm42979	4.65244	-35.5544	4.38092	-8.11574	4.82815e-16	5.65746e-15
Abtb2	4.64548	-21.3152	4.38325	-4.86287	1.15695e-06	7.44638e-06
5730507C01Rik	4.59702	-5.08943	1.30069	-3.91286	9.12094e-05	0.000501575
Pidd1	4.55229	-16.7244	4.40949	-3.79283	0.00014894	0.000795821
Gm44894	4.52472	-27.7385	4.38067	-6.33201	2.41995e-10	2.04802e-09
Tmprss4	4.5129	-30.6409	4.38068	-6.99456	2.66093e-12	2.53904e-11
Gpr158	4.50766	-16.6062	4.40949	-3.76601	0.000165877	0.000880862
Gm14022	4.49299	-31.6554	4.38069	-7.22612	4.96974e-13	4.95252e-12
Fzd10os	4.49198	-34.3017	4.38069	-7.83021	4.87073e-15	5.37682e-14
Fndc7	4.48756	-25.9101	4.38068	-5.91463	3.32631e-09	2.57573e-08
Prdm9	4.41568	-23.2009	3.31465	-6.9995	2.56877e-12	2.45395e-11
Gm29458	4.38419	-26.2637	4.3807	-5.99532	2.03085e-09	1.59749e-08
Gm9292	4.27133	-15.1415	3.12731	-4.8417	1.28736e-06	8.23396e-06
Gm16267	4.26886	-18.6459	4.40514	-4.23276	2.30841e-05	0.000134334
Cfap44	4.2032	-22.9271	4.38074	-5.23361	1.66228e-07	1.14255e-06
1700029I15Rik	4.19272	-34.2799	4.38213	-7.82265	5.17224e-15	5.6905e-14
Magi2	4.18669	-18.5032	3.68111	-5.02654	4.99421e-07	3.29856e-06
Slc16a4	4.16589	-17.5034	4.3437	-4.02961	5.58705e-05	0.000313874
Prkd3	4.14806	-21.1396	3.12467	-6.76539	1.32948e-11	1.2196e-10
Pgk1-rs7	4.13385	-5.61493	0.815225	-6.88759	5.67468e-12	5.31875e-11
Abhd11os	4.13349	-15.9234	3.78235	-4.20993	2.55449e-05	0.000147866
Fam131c	4.06354	-19.8293	4.39906	-4.50763	6.55551e-06	4.00987e-05
Gm6278	4.04722	-5.04239	1.18167	-4.26716	1.97978e-05	0.000115867
Gm49886	4.02716	-23.6653	4.38079	-5.40206	6.58805e-08	4.68132e-07
Gm49494	4.02388	-34.3792	4.38082	-7.84766	4.2387e-15	4.69493e-14
Gm47111	4.00192	-23.2562	4.1241	-5.63908	1.70959e-08	1.26525e-07
Gm49705	3.99394	-19.0002	4.39528	-4.32286	1.54021e-05	9.09532e-05
Gm11627	3.99077	-21.1527	4.38165	-4.82755	1.38222e-06	8.8338e-06
Acacb	3.96977	-20.985	3.78923	-5.53805	3.05855e-08	2.22543e-07
Gm5620	3.9683	-4.30196	0.641346	-6.70771	1.977e-11	1.78956e-10
Rgs5	3.96446	-23.2659	4.3808	-5.31088	1.09099e-07	7.59434e-07
Gm5510	3.94644	-6.01593	1.29682	-4.639	3.50092e-06	2.18798e-05
Gm41293	3.94255	-41.0803	4.3976	-9.34151	9.49675e-21	1.36084e-19
Gm43792	3.94039	-18.1831	4.35193	-4.17816	2.93876e-05	0.000169452
Gm2531	3.92711	-33.7549	4.3808	-7.70518	1.30654e-14	1.41094e-13
Ppp1r16b	3.89543	-23.2506	4.3808	-5.30739	1.11206e-07	7.73111e-07
Il1r1	3.89486	-25.5903	4.3808	-5.84145	5.17473e-09	3.94555e-08
Gm49964	3.8361	-27.9551	4.38082	-6.38126	1.75642e-10	1.5012e-09
Zfp72	3.83287	-33.596	4.38311	-7.66488	1.78993e-14	1.92031e-13
1700061A03Rik	3.82696	-23.2663	3.1832	-7.30909	2.6896e-13	2.71494e-12
Gm29681	3.81906	-27.6697	4.38082	-6.31609	2.68264e-10	2.25636e-09
Ung	3.80322	-32.0443	4.38085	-7.31464	2.58074e-13	2.60987e-12
Mir706	3.79801	-28.8735	4.38083	-6.59089	4.37211e-11	3.87625e-10
Gm49727	3.784	-23.2172	4.38083	-5.29973	1.15971e-07	8.05901e-07
B3gnt2	3.74864	-4.38987	1.17125	-3.74802	0.000178237	0.000942223
Gm22901	3.71968	-27.5499	4.38085	-6.28871	3.20118e-10	2.68013e-09
Gm36930	3.71461	-25.797	4.38085	-5.88859	3.89507e-09	2.99915e-08
Mybphl	3.71281	-28.0982	4.38085	-6.41388	1.4186e-10	1.22203e-09
5830444F18Rik	3.70228	-36.1336	4.38087	-8.24806	1.60988e-16	1.91933e-15
Gm22358	3.69926	-31.5518	4.38086	-7.2022	5.92486e-13	5.88288e-12
Optn	3.6957	-23.5882	3.72052	-6.34004	2.29703e-10	1.94903e-09
Gm44668	3.64313	-28.6879	4.38087	-6.54845	5.81359e-11	5.12377e-10
4921507G05Rik	3.62705	-20.7934	4.38271	-4.74443	2.09094e-06	1.32394e-05
Gng5-ps	3.5093	-3.59034	0.595019	-6.03399	1.59956e-09	1.2692e-08
Tpm3-rs7	3.50153	-4.71186	0.816249	-5.77258	7.80666e-09	5.86501e-08
Gm45124	3.49256	-28.8156	4.38095	-6.57747	4.78507e-11	4.23094e-10
Sez6l	3.4671	-40.8437	4.38181	-9.32118	1.15056e-20	1.64582e-19
Tigd3	3.45445	-16.5921	2.86869	-5.78386	7.30049e-09	5.49986e-08
AK157302	3.42408	-3.02922	0.783175	-3.86787	0.000109792	0.000596838
6030407O03Rik	3.36995	-22.3771	4.38096	-5.10781	3.25919e-07	2.18608e-06
Psmb10	3.28368	-21.5648	4.38249	-4.92069	8.62408e-07	5.60565e-06
Eef1a1-ps1	3.27977	-2.26504	0.451194	-5.02011	5.16424e-07	3.40263e-06
Gm15559	3.24188	-38.6112	4.38729	-8.80069	1.35972e-18	1.79757e-17
Cdkn2b	3.19066	-26.6029	4.381	-6.07233	1.26065e-09	1.0076e-08
Gm49785	3.11692	-21.3528	4.40949	-4.84246	1.2824e-06	8.20869e-06
Med18	3.07216	-41.5556	3.93342	-10.5648	4.34106e-26	7.83734e-25
Gm8130	3.05017	-4.542	0.980772	-4.63104	3.6383e-06	2.27037e-05
Gm19705	3.04664	-28.7712	4.38106	-6.56718	5.12756e-11	4.52888e-10
Dlec1	3.04327	-18.5749	4.11554	-4.51335	6.38125e-06	3.90911e-05
Gm42520	2.96891	-29.0188	4.40862	-6.5823	4.63216e-11	4.10238e-10
9030624G23Rik	2.93565	-5.91514	1.50177	-3.93878	8.18958e-05	0.000452026
Clstn3	2.92234	-16.6592	4.40949	-3.77803	0.000158074	0.000841335
Ak5	2.86804	-21.1385	4.40949	-4.79386	1.63603e-06	1.04153e-05
Tmsb15b1	2.66206	-5.02904	1.27645	-3.93985	8.15328e-05	0.000450326
Gm9844	2.62808	-5.26993	0.685281	-7.69017	1.46939e-14	1.58264e-13
Gm13342	2.58117	-4.56292	0.630538	-7.23654	4.60265e-13	4.59789e-12
Rps15a-ps7	2.41326	-4.24011	0.728566	-5.8198	5.89167e-09	4.47346e-08
Efcab8	2.27972	-38.177	4.40053	-8.67555	4.1154e-18	5.29958e-17
Gm43545	2.20665	-19.7821	4.40653	-4.48926	7.14722e-06	4.35555e-05
Gm45854	2.1756	-18.0386	4.40949	-4.09085	4.29794e-05	0.000243962
Hspb8	2.15146	-17.8066	4.40949	-4.03825	5.38504e-05	0.000302941
Gm18994	2.03195	-24.0805	4.40949	-5.46107	4.73264e-08	3.39676e-07
Slc6a17	1.94176	-16.5335	4.40949	-3.74953	0.000177167	0.000937173
Gm16089	1.92119	-2.64178	0.645198	-4.09452	4.23039e-05	0.000240211
Nkapl	1.814	-25.557	4.40949	-5.79592	6.79482e-09	5.13543e-08
Gm14165	1.63377	-3.76264	0.624342	-6.02657	1.67476e-09	1.3263e-08
Gm3150	1.55211	-4.19183	0.780812	-5.36855	7.93715e-08	5.59388e-07
Gm7292	1.51776	-3.89374	0.882234	-4.4135	1.01712e-05	6.11652e-05
Gm3219	1.5157	-4.3149	0.963133	-4.48007	7.46184e-06	4.54053e-05
Rab7-ps1	1.16523	-3.167	0.778949	-4.06574	4.78809e-05	0.000270566
