# Supplementary material for: Dual expression of Atoh1 and Ikzf2 promotes transformation of adult cochlear supporting cells into outer hair cells
Source: eLife journal article supplement (doi:10.7554/elife.66547), 2021-09-03
Supplement: supp [file elife-66547-supp-v1.zip › elife_poa_e66547_Supplemental_file_2.xlsx]

## Sheet: GO category
Term	Gene numbers	Gene names	p-value (FDR adjusted)	-log10 transform
GO:0007605~sensory perception of sound	34	GABRB3, BARHL1, CACNA1D, ESPN, MIR96, SLC9A3R2, LOXHD1, CASP3, CDH23, OTOF, JAG2, TMC1, GRXCR1, MYO15, GRXCR2, SRRM4, MCOLN3, ADGRV1, ATP8B1, WHRN, HOMER2, LHFPL5, ATP2B2, MYO7A, NAV2, USH2A, POU4F3, TMIE, STRC, SCN8A, MYO3A, KCNMA1, CLRN1, SLC26A5	4.54398e-14	13.3426
GO:0007626~locomotory behavior	20	B4GALT2, SNAP25, MYO15, MCOLN3, NEGR1, PDE1B, ATP2B2, FIGN, NAV2, ESPN, CACNA1E, NPAS3, GNAO1, MEIS1, CALB1, SCN8A, ZFP385A, CDH23, APBA1, FEZF2	4.08552e-05	4.38875
GO:0050910~detection of mechanical stimulus involved in sensory perception of sound	9	TMC1, ADGRV1, PTPRQ, STRC, LHFPL5, CHRNA9, CHRNA10, ATP2B2, PDZD7	0.000135886	3.86683
GO:0060088~auditory receptor cell stereocilium organization	8	WHRN, STRC, LHFPL5, CDH23, ATP2B2, MYO7A, PDZD7, CLRN1	0.000232058	3.6344
GO:0042472~inner ear morphogenesis	15	MYO15, ATP8A2, PTPRQ, GFI1, CHRNA9, ATP2B2, MYO7A, GATA2, POU4F3, BCR, TMIE, FGF9, SIX4, CDH23, CHRNA10	0.000281336	3.55077
GO:0007399~nervous system development	37	ROBO2, NRP2, BRSK2, NRSN1, SEMA3A, CRMP1, CHD5, KALRN, HDAC9, GLDN, DLL4, DPYSL5, DPYSL2, INSC, ERBB2, ENC1, DISC1, FEZF2, HES5, SH2B2, EPHB3, EPHA5, EPHA4, SRRM4, ADGRV1, SEMA4C, CABLES1, NAV2, MYT1, OLFM1, DLG2, MAP1B, TCF4, RBM45, INA, MDGA1, DSCAML1	0.000281336	3.55077
GO:0042491~auditory receptor cell differentiation	8	GRXCR1, MCOLN3, GFI1, KCNMA1, CDH23, MYO7A, HES5, POU4F3	0.000412966	3.38409
Figure 6-figure supplement 1B
