# Supplementary material for: Dual expression of Atoh1 and Ikzf2 promotes transformation of adult cochlear supporting cells into outer hair cells
Source: eLife journal article supplement (doi:10.7554/elife.66547), 2021-09-03
Supplement: supp [file elife-66547-supp-v1.zip › elife_poa_e66547_Supplemental_file_3.xlsx]

## Sheet: GO catetory 
Term	Gene numbers	Gene names	p-value (FDR adjusted)	-log10 transform
GO:0007605~sensory perception of sound	30	GABRB3, BARHL1, SLC1A3, CACNA1D, ESPN, SLC9A3R2, LOXHD1, CDH1, CASP3, MBP, CRYM, JAG2, TMC1, GRXCR1, GRXCR2, SRRM4, WHRN, SLC52A3, LHFPL5, ATP2B2, MYO7A, NAV2, USH2A, POU4F3, TMIE, STRC, SCN8A, MYO3A, SNAI2, SLC26A5	5.35789e-08	7.27101
GO:0007399~nervous system development	45	ROBO2, GPSM1, SEMA7A, NRP2, BRSK2, BEX1, NRSN1, AMIGO3, SEMA3A, SLC1A2, CRMP1, CHD5, DLL1, GLDN, DLL3, DLL4, ADGRG1, NEUROD6, DPYSL5, INSC, ERBB2, ENC1, AKT1, PCDHAC2, ATOH1, HES5, SH2B2, EPHB3, SEMA6B, EPHA5, HES6, SRRM4, RBFOX1, EPHA8, SEMA4C, NAV2, GAL, LHX2, MAP1B, KCTD11, INSM1, INA, MDGA1, NBL1, DSCAML1	0.000100972	3.9958
GO:0007269~neurotransmitter secretion	11	RIMS2, GRM2, SNAP25, SYT2, NRXN3, CACNA1B, NRXN2, SYN2, PPFIA3, SNAP91, DGKI	0.000368031	3.43412
GO:0030154~cell differentiation	71	ROBO2, GPSM1, SUV39H2, PTPRU, NRP2, PIWIL4, LRGUK, PTPRQ, TNFAIP2, CHD5, SCX, SHB, GLDN, RIMS2, FGF9, INSC, DNER, RNF17, MAEL, ZFP37, SEMA6B, HES6, SRRM4, NANOS3, MYO7B, CBFA2T3, PAX2, NR5A1, EID2, OBSCN, ELF3, KCTD11, SIK1, INA, EPHA2, SEMA7A, BEX1, NOTCH1, DDX25, SEMA3A, RASAL1, GATA2, DLL1, SLC9A1, DLL3, DLL4, ADGRG1, ACVR1C, RACGAP1, NEUROD6, NHLH1, PRDM16, CTNNA2, STX2, ATOH1, HES5, WNT4, JA…	0.000368031	3.43412
Figure 6-figure supplement 2B
