# Supplementary material for: Dual expression of Atoh1 and Ikzf2 promotes transformation of adult cochlear supporting cells into outer hair cells
Source: eLife journal article supplement (doi:10.7554/elife.66547), 2021-09-03
Supplement: supp [file elife-66547-supp-v1.zip › elife_poa_e66547_Supplemental_file_4.xlsx]

## Sheet: OHC-like cells over adult SCs
Genes	baseMean	log2 Fold Change	lfcSE	stat	pvalue	padj			The entire list of genes that were higher expressed in OHC-like cells
Ocm	47308	16.68	1.51734	10.9929	4.13208e-28	1.95238e-26			than in P60_WT SCs
Calm1	42235.2	2.72583	0.365404	7.45977	8.66705e-14	1.80635e-12
Atoh1	23504	13.2037	1.07428	12.2907	1.01595e-34	6.91321e-33
Cib2	15137	5.02673	0.557131	9.02252	1.83808e-19	5.5748e-18
Tecr	13014.2	2.31832	0.596631	3.88568	0.000102045	0.000870311
Selenow	10216.3	5.15026	0.365344	14.097	3.96121e-45	3.91766e-43
Krt8	9374.62	5.66113	1.27312	4.44665	8.72183e-06	8.41174e-05
Ldhb	9307.88	4.6853	0.680641	6.88365	5.83364e-12	1.06892e-10
Ly6e	8316.42	8.4172	1.54293	5.45534	4.88803e-08	6.14302e-07
Anxa4	7622.26	4.21434	0.756983	5.56729	2.58731e-08	3.37134e-07
Psph	7621.86	6.76818	1.34662	5.02606	5.00667e-07	5.55936e-06
Selenom	7607.29	6.08983	0.985356	6.18033	6.39686e-10	9.73779e-09
Lhfpl5	7149.45	9.51347	1.23035	7.73233	1.05593e-14	2.35484e-13
Calb2	6719.56	30.4177	1.28758	23.6239	2.19114e-123	4.3612e-120
Bsg	6341.2	2.83616	0.309749	9.15633	5.36934e-20	1.67311e-18
Atp6v1e1	6058.83	2.74885	0.540065	5.08985	3.58354e-07	4.04113e-06
Plbd1	5955.85	31.4227	1.56375	20.0945	8.24931e-90	3.75297e-87
Apoc3	5339.55	7.38491	1.56186	4.72826	2.26447e-06	2.31729e-05
Tspan13	4949.33	2.7238	0.544122	5.00587	5.56107e-07	6.1322e-06
Krt7	4768.57	28.1184	1.3589	20.6921	4.07895e-95	3.09282e-92
Ppp1r27	4601.06	9.08104	1.58358	5.73451	9.77931e-09	1.32977e-07
Reep5	4533.72	3.1154	0.368789	8.44766	2.97194e-17	7.9002e-16
Calml4	4419.26	31.081	1.24704	24.9238	4.1065e-137	2.17959e-133
Ppp1r17	4170.46	29.9381	1.46846	20.3874	2.16317e-92	1.23015e-89
Ap1ar	4044.64	3.54378	0.656081	5.40143	6.6112e-08	8.14784e-07
Triobp	3820.86	3.30951	0.527836	6.26996	3.61134e-10	5.61009e-09
Kcna10	3550.85	25.3933	1.71792	14.7814	1.93062e-49	2.12008e-47
Igll1	3454.18	30.5012	2.05535	14.8399	8.08655e-50	9.06776e-48
Krt18	3215.4	6.2008	1.43235	4.32912	1.49703e-05	0.000139808
Espn	3206.49	14.8213	0.634955	23.3422	1.65383e-120	2.6334e-117
Ecel1	3148.04	30.376	1.81217	16.7622	4.61142e-63	8.8467e-61
Pls1	3036.43	3.01255	0.677278	4.44803	8.66605e-06	8.36807e-05
Pkig	2954.63	3.24798	0.430735	7.54054	4.6804e-14	9.96336e-13
Ccser2	2950.67	5.14918	0.991374	5.19399	2.05838e-07	2.39588e-06
Slc26a5	2856.27	12.7629	1.1471	11.1262	9.35011e-29	4.63806e-27
Lrrc10b	2850.17	15.4826	1.00387	15.4229	1.14772e-53	1.4738e-51
Chrna9	2842.36	14.5891	1.03679	14.0715	5.68646e-45	5.55493e-43
Myo7a	2832.99	15.2535	0.935804	16.2999	9.88056e-60	1.57328e-57
Lmo7	2812.09	27.1694	1.29241	21.0223	4.09837e-98	3.26291e-95
Rasd2	2799	6.55762	1.52053	4.31271	1.61262e-05	0.00015025
Cd63	2719.36	14.22	0.899068	15.8164	2.39727e-56	3.4082e-54
Pvalb	2702.05	29.7311	1.62432	18.3037	7.72672e-75	2.32137e-72
Akt1	2588.76	4.33516	0.98893	4.38369	1.16685e-05	0.000110265
Hes6	2581.24	7.16195	1.48223	4.83186	1.35264e-06	1.4226e-05
Gm28437	2501.05	5.06861	0.565233	8.96729	3.03908e-19	9.11325e-18
Hagh	2461.1	2.3508	0.539762	4.35526	1.32911e-05	0.000124694
Ikzf2	2371.71	3.39516	0.607952	5.5846	2.34245e-08	3.06481e-07
Cldn3	2346.31	5.61979	1.04153	5.39571	6.82522e-08	8.3986e-07
Smpx	2337.62	4.96579	1.18953	4.17457	2.98553e-05	0.000270259
Ankrd24	2287.29	5.06057	0.916017	5.52453	3.30369e-08	4.2664e-07
Dmpk	2213.01	12.4216	1.25718	9.88051	5.05759e-23	1.8772e-21
Tmc1	2176.55	31.1864	1.71579	18.1762	7.97044e-74	2.22655e-71
Mkrn2os	2172.55	6.05691	1.04551	5.79325	6.90387e-09	9.59253e-08
Gm5737	2171.95	14.5473	1.94965	7.4615	8.55438e-14	1.78521e-12
Obscn	2161.9	11.9195	1.63845	7.27483	3.46868e-13	6.91262e-12
Aplp1	2114.64	31.0119	1.30025	23.8507	9.95755e-126	2.26506e-122
Strip2	2114.16	27.0436	1.5827	17.0871	1.85275e-65	3.83134e-63
Calb1	2084.54	31.1092	1.59566	19.4961	1.18491e-84	4.49221e-82
Fzd9	2060.27	5.74598	1.37994	4.16393	3.12818e-05	0.000282209
Ush2a	2004.59	31.3434	1.89411	16.5478	1.66023e-61	2.90505e-59
Heyl	1932.2	29.547	1.22161	24.187	3.0498e-129	9.7124e-126
Mt1	1845.7	29.3962	2.7026	10.877	1.48398e-27	6.80964e-26
Gm6558	1818.13	26.8531	1.51851	17.6839	5.58415e-70	1.36794e-67
Pxdc1	1811.13	5.4165	0.992286	5.45861	4.79875e-08	6.04035e-07
Creld2	1759.37	4.04485	0.912862	4.43095	9.38179e-06	9.0046e-05
Mfng	1755.34	14.4916	1.0636	13.6251	2.83855e-42	2.55357e-40
Cdh1	1735.92	2.15149	0.516447	4.16594	3.10071e-05	0.000280049
Ap3b2	1698.46	10.9343	1.92796	5.67142	1.4162e-08	1.89816e-07
Grxcr2	1697.97	25.9404	2.25352	11.5111	1.16037e-30	6.37122e-29
Ablim2	1637.76	13.8168	1.12575	12.2734	1.25792e-34	8.48724e-33
Atp2b2	1634.84	5.36128	1.34774	3.97797	6.95056e-05	0.000603785
Syne4	1565.09	27.6961	1.37753	20.1057	6.57809e-90	3.17403e-87
Loxhd1	1554.08	28.378	1.37855	20.5853	3.71462e-94	2.46449e-91
Dner	1552.57	29.0209	1.37322	21.1335	3.91414e-99	3.28026e-96
Grp	1528.82	29.7044	1.44986	20.4877	2.76956e-93	1.63332e-90
Dll3	1487.76	14.5403	1.38817	10.4744	1.13205e-25	4.81968e-24
Mreg	1467.72	9.44277	0.80563	11.721	9.95287e-32	5.7629e-30
Cdc25b	1464.89	30.0764	1.41019	21.3279	6.25279e-101	5.53129e-98
Epb41l4a	1457.43	4.24959	0.959019	4.43119	9.37158e-06	9.00022e-05
Chst2	1453.39	24.4317	1.53053	15.9629	2.31637e-57	3.41514e-55
Six4	1438.16	4.30247	1.089	3.95084	7.78773e-05	0.000673935
Sh3glb2	1433.79	2.63479	0.634129	4.15498	3.25322e-05	0.000292495
AI593442	1424.95	26.604	1.89704	14.0239	1.11271e-44	1.06733e-42
Nrsn1	1408.62	30.6639	1.7576	17.4465	3.66102e-68	8.57271e-66
Alpl	1380.11	14.6186	1.23956	11.7933	4.22434e-32	2.50053e-30
Sh3gl3	1374.66	26.2357	1.60863	16.3094	8.46017e-60	1.36072e-57
Kif5c	1333.26	30.1632	1.32136	22.8274	2.45067e-115	3.25184e-112
Cacna1d	1268.75	10.3102	1.25015	8.24717	1.62189e-16	4.09278e-15
Eya2	1262.21	29.4883	1.60703	18.3495	3.3287e-75	1.06006e-72
Srpk1	1259.76	2.44838	0.622883	3.93072	8.46911e-05	0.000728647
Endod1	1251.9	5.57995	1.02457	5.44614	5.14743e-08	6.44866e-07
Mycl	1235.95	6.39032	1.22764	5.20539	1.9359e-07	2.26324e-06
Rab3b	1231.22	12.7377	1.36029	9.36395	7.68098e-21	2.53743e-19
Kncn	1230.11	27.8882	2.14378	13.0088	1.08974e-38	8.7196e-37
Strc	1228.35	5.27265	1.19494	4.4125	1.02184e-05	9.7488e-05
Pcp4	1204.53	24.7872	1.95527	12.6771	7.92083e-37	5.81214e-35
Osbpl1a	1199.09	26.5688	1.59179	16.6911	1.52101e-62	2.84931e-60
Ecm1	1192.57	14.4469	1.97347	7.32056	2.46947e-13	4.96481e-12
Snx31	1188.26	9.49698	2.45755	3.8644	0.000111361	0.000945706
Card19	1164.81	3.00114	0.76146	3.9413	8.10414e-05	0.000699795
Neurod6	1155.47	29.7322	1.47873	20.1066	6.46138e-90	3.17403e-87
Pou4f3	1140.79	26.5678	2.20314	12.0591	1.73713e-33	1.08899e-31
Lrtm2	1135.51	12.4013	1.33487	9.29027	1.53895e-20	5.04214e-19
Mthfd2	1125.45	4.97995	1.19744	4.15884	3.19871e-05	0.000288246
Miat	1117.55	27.7372	1.39969	19.8167	2.13871e-87	8.51367e-85
Syt13	1109.87	13.3714	1.12163	11.9214	9.16034e-33	5.61e-31
Rassf4	1103.46	29.2729	1.45663	20.0963	7.9441e-90	3.72041e-87
Mpc1	1085.95	3.03022	0.520964	5.81656	6.00699e-09	8.40504e-08
Nsmf	1075.67	7.12145	1.34853	5.28088	1.28565e-07	1.53e-06
Map1b	1071.86	13.4465	1.1653	11.539	8.38875e-31	4.65415e-29
Dusp14	1058.69	11.3929	1.68547	6.75949	1.38475e-11	2.45812e-10
Megf6	1031.9	29.2364	1.43586	20.3616	3.66055e-92	2.0099e-89
Snap91	1028.98	24.8673	2.17018	11.4586	2.12878e-30	1.15688e-28
Gfra4	1022.61	13.9921	1.05404	13.2746	3.24796e-40	2.7805e-38
Fcrlb	1012.01	26.2769	1.52966	17.1782	3.86509e-66	8.20583e-64
Epha5	1006.63	30.0534	1.54371	19.4683	2.03934e-84	7.55171e-82
Pamr1	998.236	30.2722	2.41134	12.5541	3.77495e-36	2.70759e-34
Gm1673	981.913	3.30304	0.721686	4.57683	4.72069e-06	4.68042e-05
Atp8a1	981.88	3.32018	0.841177	3.94706	7.91151e-05	0.000684275
Ckmt1	978.953	28.6787	1.19353	24.0285	1.40121e-127	3.71858e-124
Chrna10	978.526	25.7739	2.37355	10.8588	1.81109e-27	8.23942e-26
Srgap1	951.278	2.99224	0.750242	3.98837	6.65302e-05	0.000580153
Cotl1	918.959	29.2214	1.34299	21.7585	5.74283e-105	5.7152e-102
Jag2	917.829	29.4307	1.37962	21.3324	5.68182e-101	5.32186e-98
Tmem255b	917.626	30.4106	1.63174	18.6369	1.612e-77	5.23836e-75
Ppp2r1b	892.016	5.03649	1.18532	4.24904	2.14686e-05	0.000197256
Snap25	885.738	28.547	1.51963	18.7855	9.92433e-79	3.29219e-76
Zmiz1	885.511	6.21191	0.982024	6.32562	2.52211e-10	3.97226e-09
Srd5a1	884.701	12.044	1.25043	9.63184	5.86694e-22	2.0668e-20
Barhl1	872.632	29.4172	1.17525	25.0306	2.84108e-138	2.26192e-134
Dytn	864.43	25.6041	1.99371	12.8424	9.48808e-38	7.33392e-36
Cdkn1c	861.467	8.86689	1.57797	5.61916	1.91883e-08	2.54613e-07
Timp2	855.118	28.4561	1.44739	19.6603	4.72215e-86	1.83392e-83
Gm29216	853.456	2.53921	0.614756	4.13043	3.62079e-05	0.00032481
Gm28661	840.285	5.56001	0.568182	9.78562	1.29794e-22	4.69708e-21
Rundc3a	834.377	29.3317	1.12696	26.0273	2.43368e-149	3.87514e-145
Gldn	833.366	26.5506	2.60323	10.1991	2.00139e-24	8.02702e-23
Elmod1	828.241	26.2535	1.93036	13.6003	3.98736e-42	3.5669e-40
Anxa6	823.186	28.1468	1.27828	22.0193	1.88126e-107	2.13966e-104
Slc39a2	808.578	29.6935	1.80027	16.4939	4.05696e-61	6.87222e-59
Madd	799.461	6.91397	1.12399	6.15128	7.68614e-10	1.15568e-08
Spock2	794.533	9.36027	1.15056	8.13539	4.1063e-16	1.01058e-14
Gm32742	787.843	26.837	2.10609	12.7425	3.43086e-37	2.55278e-35
Thsd7b	766.282	28.6615	1.25692	22.803	4.28221e-115	5.24505e-112
Pla2g7	764.834	12.8558	1.71424	7.49942	6.41029e-14	1.34658e-12
Tnc	747.256	28.819	1.95044	14.7756	2.10344e-49	2.26305e-47
Ldha	736.462	11.3508	1.49281	7.60362	2.87955e-14	6.22976e-13
Slc27a2	731.864	11.8543	1.01601	11.6675	1.86746e-31	1.06963e-29
Itpr3	726.278	13.7107	1.79347	7.6448	2.0927e-14	4.5835e-13
Fgf21	722.712	26.6	1.75574	15.1503	7.54083e-52	9.09641e-50
Crlf1	721.819	8.08826	1.58276	5.11022	3.21783e-07	3.652e-06
Lama5	717.743	4.82425	0.993009	4.85821	1.1845e-06	1.25823e-05
Mcam	696.928	28.8539	1.19064	24.234	9.75361e-130	3.88267e-126
Lhx3	686.97	29.1356	1.81378	16.0635	4.59944e-58	6.97495e-56
Rem2	678.707	27.2485	1.43469	18.9925	1.96592e-80	6.80509e-78
Cd83	677.752	24.1642	2.48564	9.72154	2.44072e-22	8.73339e-21
Actr3b	663.539	29.1637	1.43281	20.3543	4.25628e-92	2.25909e-89
Olfml3	659.785	27.9539	3.37536	8.28175	1.21383e-16	3.08751e-15
Sod3	641.915	28.4882	2.80829	10.1443	3.51208e-24	1.38766e-22
Ccdc88c	641.545	12.326	1.06072	11.6204	3.24615e-31	1.83945e-29
Runx1t1	635.176	12.6625	1.11483	11.3583	6.74765e-30	3.5343e-28
Lrrc26	632.452	29.0515	1.58339	18.3477	3.44398e-75	1.07526e-72
Nfic	627.872	4.46524	1.136	3.93069	8.4703e-05	0.000728647
Neurl1a	620.674	7.10216	1.41568	5.01679	5.2541e-07	5.81383e-06
Upk3bl	602.766	17.0088	3.2908	5.1686	2.3586e-07	2.71554e-06
Smim18	598.707	6.64934	1.35432	4.90972	9.12067e-07	9.78628e-06
Gm15459	595.738	3.52903	0.80176	4.4016	1.07454e-05	0.000102271
Nrxn3	579.045	28.3507	1.84183	15.3927	1.83266e-53	2.31599e-51
Map2	573.646	10.4717	1.04245	10.0452	9.64354e-24	3.71802e-22
Hsd17b14	573.391	7.20234	1.50016	4.80105	1.57839e-06	1.63838e-05
Ccer2	573.083	15.2817	1.9964	7.6546	1.93908e-14	4.26463e-13
Fabp5	567.582	29.3333	1.4646	20.0283	3.12362e-89	1.3816e-86
Olah	562.486	26.3244	2.74408	9.59317	8.54177e-22	2.99583e-20
Acvr1c	557.997	14.3563	1.62497	8.83484	1.00245e-18	2.91278e-17
Inafm2	548.413	5.21289	1.1131	4.68324	2.82382e-06	2.85642e-05
Pjvk	546.882	22.8877	2.24818	10.1805	2.42253e-24	9.64348e-23
Impdh1	536.423	28.4006	1.87104	15.179	4.8696e-52	6.01075e-50
Gfi1	535.474	26.6254	1.54655	17.2159	2.01713e-66	4.46094e-64
Nav2	529.004	28.6567	1.38544	20.6841	4.81196e-95	3.48276e-92
Bex2	525.012	12.9689	1.31594	9.85521	6.5082e-23	2.39884e-21
Tent5a	523.315	7.35978	1.65988	4.43393	9.25317e-06	8.90261e-05
Casc4	518.224	11.2867	1.14927	9.82082	9.15909e-23	3.3373e-21
Plce1	517.79	25.8125	2.20492	11.7068	1.17621e-31	6.78579e-30
Mapk11	517.597	13.183	1.47758	8.92201	4.57885e-19	1.35771e-17
Coro2a	517.205	27.9674	1.53688	18.1975	5.39891e-74	1.53512e-71
Cxcl14	505.227	13.2689	1.52391	8.70711	3.11722e-18	8.81625e-17
Zfp687	504.514	5.52217	1.30455	4.233	2.30593e-05	0.000210898
Fscn2	500.517	14.6337	2.16115	6.77124	1.27686e-11	2.27675e-10
Lhx2	492.364	26.7977	2.6688	10.0411	1.00542e-23	3.85765e-22
Fam20c	485.164	5.95958	1.18357	5.03525	4.77214e-07	5.30634e-06
Gse1	483.318	4.08396	0.714618	5.71489	1.09775e-08	1.48509e-07
Adgrg1	474.513	5.69853	1.39851	4.07472	4.60703e-05	0.000408679
Rnf182	473.066	28.2098	1.19604	23.586	5.37016e-123	9.50101e-120
Sowaha	470.083	4.90352	1.18758	4.129	3.64337e-05	0.000326652
Inka2	468.05	28.5293	1.38376	20.6173	1.92165e-94	1.33037e-91
Adamtsl1	467.038	27.9778	1.80757	15.4782	4.87227e-54	6.41167e-52
Plekhg5	464.411	13.7349	1.17915	11.6482	2.34485e-31	1.33825e-29
Ppm1j	461.378	28.4584	1.91551	14.8568	6.28296e-50	7.14597e-48
Cdc42se2	461.285	28.4816	1.56142	18.2409	2.44385e-74	7.07516e-72
Defb25	460.649	23.6239	1.9807	11.9271	8.55382e-33	5.25878e-31
Gm44401	459.754	28.6717	1.59349	17.9931	2.20828e-72	5.95975e-70
Flrt1	457.279	14.1724	1.49249	9.49581	2.18506e-21	7.45027e-20
Ptpru	456.912	10.2844	1.38626	7.41883	1.18161e-13	2.43398e-12
Tmie	454.458	27.6829	1.25785	22.008	2.41227e-107	2.5607e-104
Grxcr1	453.85	25.1183	2.22628	11.2826	1.59878e-29	8.21206e-28
Card10	452.538	8.43644	2.05207	4.11119	3.9362e-05	0.00035093
Rgs11	443.526	27.1023	1.7254	15.7078	1.33733e-55	1.83572e-53
Laptm5	441.608	11.0313	1.80505	6.11137	9.87799e-10	1.47965e-08
Rgs12	439.52	13.2696	1.43403	9.2534	2.17466e-20	7.00954e-19
Fez1	434.559	27.0228	1.7016	15.8808	8.60882e-57	1.24617e-54
Xirp2	434.546	10.8198	2.32719	4.64929	3.33075e-06	3.35032e-05
Serhl	431.808	4.87027	0.908267	5.36216	8.22313e-08	1.00105e-06
Mob3b	431.633	26.1269	1.47594	17.7018	4.05846e-70	1.00973e-67
Slc1a5	429.212	12.3848	1.78969	6.92008	4.51375e-12	8.30895e-11
Umodl1	427.9	27.8156	1.93377	14.3841	6.51214e-47	6.64697e-45
Mknk1	427.341	5.28114	1.34098	3.93827	8.20705e-05	0.000707914
Ctsc	417.705	27.637	1.84504	14.979	1.00686e-50	1.16175e-48
Mpped2	416.015	29.0436	1.76357	16.4686	6.16568e-61	1.03343e-58
Klhdc7b	413.867	26.7955	1.46437	18.2983	8.54356e-75	2.51924e-72
Crhr1	412.691	12.4231	1.24455	9.98203	1.82686e-23	6.92599e-22
Gpr156	412.181	25.7703	2.16729	11.8906	1.32511e-32	8.05336e-31
Fcho1	411.074	28.478	1.71123	16.6418	3.46911e-62	6.34926e-60
Ptprq	407.701	25.1795	2.23729	11.2545	2.20159e-29	1.1272e-27
Sgpp2	402.3	8.54681	1.28354	6.65876	2.76145e-11	4.74844e-10
Rncr4	402.118	6.73066	1.2667	5.31355	1.0751e-07	1.28713e-06
Fgf9	400.544	26.3202	1.83632	14.3331	1.35893e-46	1.37823e-44
Ccdc92	400.057	6.18827	1.37059	4.51504	6.3304e-06	6.17641e-05
Lvrn	397.355	28.5999	2.0911	13.677	1.39372e-42	1.28279e-40
Gal	396.993	27.5873	2.10529	13.1038	3.1311e-39	2.55675e-37
Apoa4	396.691	11.9563	1.22654	9.74797	1.88191e-22	6.74901e-21
Lasp1	394.571	21.8449	1.76408	12.3832	3.22313e-35	2.24113e-33
Ndrg4	393.457	10.5329	2.12153	4.96475	6.87881e-07	7.50214e-06
Slc1a3	392.969	27.139	2.4678	10.9972	3.94025e-28	1.87285e-26
Cacna1b	390.353	13.1689	1.54984	8.49695	1.94637e-17	5.2e-16
Mgat5b	387.756	28.1998	1.42237	19.8259	1.77948e-87	7.26531e-85
Simc1	386.995	6.79389	1.72816	3.93128	8.44942e-05	0.000727637
Gipc2	379.524	10.9701	1.19285	9.19653	3.69707e-20	1.17035e-18
Eif2s3y	374.671	23.6865	2.65731	8.91371	4.93511e-19	1.46063e-17
Bcr	374.131	9.4958	1.27555	7.4445	9.73118e-14	2.02284e-12
Angpt1	373.74	25.7195	2.16816	11.8624	1.85604e-32	1.11523e-30
Cck	371.636	29.0955	1.92888	15.0842	2.05847e-51	2.42793e-49
Osbpl3	370.875	20.6817	2.24526	9.21129	3.2224e-20	1.02212e-18
Ppp1r1a	368.44	23.3532	2.14022	10.9116	1.01463e-27	4.6965e-26
Erich3	367.486	26.9509	1.16793	23.0759	8.0919e-118	1.17134e-114
Ccdc74a	366.714	7.45902	1.58169	4.71584	2.40711e-06	2.45695e-05
Smoc2	365.733	24.0704	2.61133	9.21768	3.03601e-20	9.64918e-19
Ankfn1	365.239	27.9659	1.35971	20.5676	5.35321e-94	3.40957e-91
Gas6	360.537	28.3093	1.42638	19.8469	1.17257e-87	4.9134e-85
Pdzd7	358.507	11.6807	1.68224	6.94353	3.82434e-12	7.09731e-11
Ica1l	356.501	27.8596	1.52086	18.3184	5.90633e-75	1.80858e-72
Disp2	355.837	28.6595	2.03938	14.053	7.38134e-45	7.16665e-43
Slc18a1	352.788	12.5353	1.69082	7.41371	1.22816e-13	2.5201e-12
Wnt4	348.751	7.85823	1.52936	5.13824	2.77323e-07	3.16546e-06
Sting1	347.156	28.6989	1.81993	15.7692	5.06842e-56	7.01778e-54
Slc22a23	347.029	25.6105	1.43966	17.7893	8.56111e-71	2.19869e-68
Dsp	345.855	24.4422	2.23383	10.9418	7.27282e-28	3.39604e-26
Arxes2	344.222	10.8508	1.68409	6.44312	1.17039e-10	1.89777e-09
Ece1	341.942	4.31357	1.06737	4.04132	5.31517e-05	0.000467588
Gipc3	339.99	12.2697	1.10893	11.0644	1.86726e-28	9.00982e-27
Rnf150	339.223	26.4747	1.60072	16.5392	1.91604e-61	3.3162e-59
Sprr1a	338.926	22.2762	3.24299	6.86901	6.46492e-12	1.18051e-10
Man1c1	336.269	12.4911	1.45547	8.58214	9.31272e-18	2.52617e-16
Nop2	334.673	6.69426	1.59888	4.18684	2.82864e-05	0.000256494
Btbd11	333.269	28.0321	1.56793	17.8785	1.73591e-71	4.5313e-69
Gm35853	332.182	29.1061	1.73248	16.8002	2.43029e-63	4.71921e-61
Gm44239	331.649	22.0693	4.27624	5.16092	2.45743e-07	2.82525e-06
Cbfa2t3	327.723	12.3243	0.809408	15.2263	2.36468e-52	2.96479e-50
D930020B18Rik	325.455	27.8003	1.6537	16.8109	2.02899e-63	3.98859e-61
Necab2	324.75	25.9711	2.05463	12.6403	1.26572e-36	9.24501e-35
Fam57b	324.749	27.1998	1.55753	17.4635	2.71914e-68	6.46221e-66
Actn3	321.085	28.9736	2.14409	13.5132	1.30683e-41	1.14333e-39
Gata2	319.928	9.90163	1.75541	5.64066	1.69404e-08	2.26175e-07
Nebl	319.922	23.9381	2.03436	11.7669	5.78203e-32	3.39732e-30
Kcnh2	319.459	25.5238	1.6545	15.4269	1.07882e-53	1.39658e-51
Lctl	319.37	28.3378	2.25164	12.5854	2.54048e-36	1.83041e-34
Zcchc12	318.478	26.5385	2.45854	10.7944	3.65801e-27	1.65004e-25
Ebf2	315.419	23.8955	2.17191	11.002	3.73568e-28	1.78628e-26
Blnk	314.869	28.7402	1.91481	15.0094	6.36745e-51	7.45507e-49
Tmem191c	308.497	27.0173	1.55556	17.3682	1.43653e-67	3.26771e-65
Plin5	308.458	13.7035	2.38934	5.73528	9.7353e-09	1.32518e-07
Misp3	307.282	26.5713	1.72111	15.4385	9.01935e-54	1.17717e-51
Pdlim3	304.384	11.6866	2.69642	4.3341	1.46358e-05	0.000136764
Gm17322	303.865	28.1153	2.05356	13.691	1.1489e-42	1.0636e-40
Slc43a1	302.872	27.7889	2.24928	12.3546	4.6021e-35	3.18605e-33
Cfap161	302.828	13.1359	1.57708	8.32926	8.13506e-17	2.10283e-15
Galnt13	301.843	26.9783	1.6718	16.1373	1.39519e-58	2.15685e-56
Plekhb2	300.132	27.5099	1.8522	14.8526	6.69557e-50	7.56124e-48
Slc6a11	298.958	28.5856	1.71621	16.6563	2.7253e-62	5.04592e-60
Srrm4	298.232	28.4169	1.93862	14.6583	1.19292e-48	1.27482e-46
Chgb	297.879	28.3914	2.53219	11.2122	3.55267e-29	1.78452e-27
Syn2	297.477	12.1077	1.92112	6.3024	2.93068e-10	4.6021e-09
Mapk12	297.218	27.7432	1.61287	17.2011	2.60501e-66	5.63281e-64
Ak1	293.031	26.3897	2.09302	12.6084	1.89782e-36	1.37359e-34
Fgf11	291.48	10.6009	1.77244	5.98092	2.21874e-09	3.24715e-08
Aldh18a1	291.368	11.8222	1.42729	8.28294	1.20167e-16	3.06639e-15
Ncald	289.893	26.8628	1.72433	15.5787	1.01651e-54	1.37169e-52
Mical2	288.988	9.20048	1.30654	7.04186	1.89695e-12	3.58305e-11
Pdgfra	288.53	24.4939	2.02836	12.0757	1.4195e-33	8.9339e-32
Prag1	287.591	11.1734	1.48003	7.54948	4.37004e-14	9.31514e-13
Rims2	287.409	27.8946	1.54563	18.0474	8.27069e-73	2.27059e-70
Sh2d4b	287.215	8.85932	1.4365	6.16728	6.94736e-10	1.05155e-08
Zfp618	285.102	26.6651	1.51016	17.6572	8.9573e-70	2.16102e-67
Insm1	283.677	7.84553	1.81981	4.31117	1.62391e-05	0.000151125
P2rx3	282.626	17.4824	2.90963	6.00844	1.87319e-09	2.75155e-08
Galnt14	278.822	27.7474	1.75687	15.7936	3.44135e-56	4.80672e-54
Plscr5	277.654	25.346	2.47658	10.2343	1.39231e-24	5.67e-23
Gm4825	277.402	24.9406	1.68741	14.7804	1.96013e-49	2.12321e-47
Elf3	277.228	21.1168	3.23905	6.51943	7.0577e-11	1.17184e-09
Chrna1	274.659	27.1783	2.06214	13.1797	1.14923e-39	9.5807e-38
Sh3pxd2a	273.886	6.6132	1.12658	5.87017	4.35345e-09	6.17825e-08
H2ac6	273.689	7.70605	2.00077	3.85154	0.000117379	0.000994693
Gtf3c4	272.588	9.93462	1.47322	6.74347	1.5465e-11	2.73307e-10
Gm4735	270.45	3.41287	0.769093	4.43753	9.09971e-06	8.76026e-05
Sult4a1	269.742	27.9154	1.68675	16.5498	1.60757e-61	2.84414e-59
Gdap1	269.426	27.2455	1.66952	16.3193	7.19253e-60	1.16864e-57
Scn4a	267.605	12.8044	1.80341	7.10014	1.24628e-12	2.3823e-11
Sema6b	266.426	4.58863	1.16291	3.94583	7.95243e-05	0.00068744
Pdzrn3	263.428	28.178	2.4793	11.3653	6.22677e-30	3.27224e-28
Gm7993	262.852	11.0407	0.970492	11.3764	5.48443e-30	2.90128e-28
Eid2	259.68	27.0174	1.50531	17.948	4.9712e-72	1.31927e-69
Gm13373	257.847	26.4721	2.28036	11.6088	3.71945e-31	2.07806e-29
Tcerg1l	255.763	28.3769	2.31952	12.234	2.04705e-34	1.36382e-32
Pdlim4	254.522	28.1966	2.08397	13.5302	1.03727e-41	9.12515e-40
Adm	253.612	19.4868	2.7432	7.1037	1.21464e-12	2.32461e-11
Ddx3y	251.459	24.958	3.13659	7.95706	1.76173e-15	4.14357e-14
Kcnh3	249.636	28.8913	2.80506	10.2997	7.06906e-25	2.93127e-23
Ifitm2	248.896	12.2319	1.06023	11.5371	8.57925e-31	4.7269e-29
Elovl2	248.804	26.2025	2.04109	12.8375	1.01027e-37	7.77124e-36
Krt80	244.953	26.4496	1.59234	16.6106	5.84309e-62	1.05727e-59
Sema3a	244.689	10.9293	1.79698	6.08203	1.18671e-09	1.76763e-08
Krt33b	243.788	27.2631	2.72647	9.99942	1.53299e-23	5.82571e-22
Gpr68	239.212	27.723	2.14259	12.939	2.7113e-38	2.13207e-36
Tex33	237.073	28.2284	2.05045	13.767	4.02825e-43	3.75098e-41
Ly6g6c	236.429	17.0923	2.60951	6.55001	5.75338e-11	9.70457e-10
Gnao1	235.843	26.8306	1.51457	17.715	3.21466e-70	8.12492e-68
Sybu	232.758	7.97581	1.81274	4.39987	1.08318e-05	0.00010297
Shroom2	227.845	6.67199	1.4427	4.62464	3.75242e-06	3.75077e-05
Kif1a	227.101	13.3908	1.60767	8.32931	8.13171e-17	2.10283e-15
Mboat2	226.619	23.4518	1.97504	11.8741	1.61358e-32	9.73223e-31
Fbxl16	226.035	27.9916	1.81827	15.3946	1.77941e-53	2.26668e-51
Bend4	224.865	9.15294	1.73224	5.28388	1.26475e-07	1.50738e-06
Robo2	222.853	26.9979	2.37176	11.3831	5.0767e-30	2.69454e-28
Lrrc30	221.737	27.563	2.42806	11.3519	7.26015e-30	3.79028e-28
Sh3bp4	220.529	24.5181	2.66653	9.19474	3.75885e-20	1.18754e-18
Begain	220.24	12.137	1.51194	8.02744	9.95242e-16	2.36174e-14
Wasf1	213.543	26.6543	1.67477	15.9152	4.97189e-57	7.26307e-55
Wnt10a	209.074	27.9818	2.43598	11.4869	1.53531e-30	8.37215e-29
Mdga1	208.896	28.4163	1.92254	14.7806	1.95443e-49	2.12321e-47
Gm47283	208.433	4.49263	0.816103	5.50498	3.6921e-08	4.72203e-07
Nrp2	207.793	31.264	1.81376	17.2372	1.39716e-66	3.13339e-64
Mapk10	207.205	26.6989	1.55219	17.2008	2.61777e-66	5.63281e-64
Tnfaip2	206.331	27.869	1.79002	15.5691	1.17988e-54	1.57876e-52
Cldn4	204.881	23.2081	2.17375	10.6765	1.31101e-26	5.7826e-25
Hmgn3	203.006	26.7551	1.66339	16.0847	3.26423e-58	4.99772e-56
Bmp3	202.11	25.8602	2.22678	11.6133	3.52807e-31	1.98507e-29
Plekho1	200.539	27.5388	1.37598	20.0139	4.16392e-89	1.79195e-86
Zfp395	196.47	3.93117	1.00502	3.91155	9.17039e-05	0.000786323
Art5	193.163	9.43109	2.18668	4.31297	1.61078e-05	0.000150167
Gm6277	192.216	22.5625	2.55357	8.83567	9.95016e-19	2.89646e-17
Piwil4	192.046	26.6912	3.22559	8.27482	1.28653e-16	3.26721e-15
Kirrel2	192.034	27.322	1.845	14.8086	1.28829e-49	1.43451e-47
St18	191.884	11.6999	1.687	6.93533	4.05287e-12	7.48653e-11
Fam217b	191.808	23.5025	2.14152	10.9747	5.0584e-28	2.38298e-26
Pde10a	190.014	9.37792	1.61662	5.80096	6.59361e-09	9.17745e-08
Gabrb3	188.995	19.5572	2.67729	7.30483	2.77623e-13	5.5605e-12
Hint1	188.789	26.5335	1.65978	15.9862	1.59501e-57	2.37358e-55
Rgl1	188.055	11.3859	2.16366	5.26234	1.42232e-07	1.68259e-06
Crmp1	185.007	23.9899	3.02522	7.92997	2.19192e-15	5.13264e-14
Myo3a	184.551	28.0644	1.96216	14.3028	2.10144e-46	2.1178e-44
Gm13394	183.742	5.41772	0.774855	6.9919	2.71179e-12	5.074e-11
A930009A15Rik	182.765	9.69681	1.26444	7.66887	1.73522e-14	3.82157e-13
Hs3st3b1	182.081	25.251	1.97745	12.7695	2.42741e-37	1.82319e-35
E230025N22Rik	182.038	24.7572	2.53273	9.77491	1.44279e-22	5.19764e-21
Podxl2	181.899	8.65197	1.37935	6.27248	3.55344e-10	5.53094e-09
Rps18-ps5	181.831	5.38234	0.669112	8.044	8.69509e-16	2.07886e-14
Syt7	181.502	26.9442	1.77039	15.2194	2.62964e-52	3.27123e-50
St8sia3	181.259	27.0331	1.31704	20.5256	1.27096e-93	7.78367e-91
Synpo	181.112	27.0949	1.98576	13.6446	2.1738e-42	1.98928e-40
Vwa2	180.667	27.0935	1.90448	14.2262	6.30403e-46	6.31315e-44
Nbl1	180.448	26.3792	2.33427	11.3009	1.29932e-29	6.71726e-28
Tunar	180.154	19.509	2.51159	7.76759	7.99965e-15	1.79913e-13
Ucp3	180.104	28.0136	1.80505	15.5196	2.55698e-54	3.39291e-52
Odf3b	179.978	26.2239	1.92429	13.6278	2.73658e-42	2.48998e-40
Esrp2	179.674	25.8955	1.61768	16.0078	1.12767e-57	1.69395e-55
Tnfaip3	179.556	18.4685	3.07691	6.00226	1.94586e-09	2.85566e-08
Tle2	179.284	27.8126	1.67512	16.6034	6.58806e-62	1.17867e-59
Hecw1	179.011	7.81704	1.78807	4.37177	1.23241e-05	0.000116048
Cox8b	177.326	27.0784	2.844	9.52124	1.71125e-21	5.88514e-20
Gipr	176.527	13.3209	2.34507	5.68038	1.34399e-08	1.80441e-07
Nacad	176.23	28.26	2.30701	12.2496	1.68769e-34	1.13389e-32
Mgll	175.976	26.7211	2.04258	13.082	4.17195e-39	3.38928e-37
Cyth1	174.681	12.9203	1.61176	8.0163	1.08982e-15	2.5785e-14
Enc1	174.094	27.6626	2.00772	13.7781	3.45049e-43	3.25102e-41
Rara	173.987	9.43744	1.31337	7.18566	6.68827e-13	1.31316e-11
Heg1	173.785	11.3135	2.01264	5.62121	1.8962e-08	2.52031e-07
Syde2	173.656	25.7238	2.32456	11.0661	1.83203e-28	8.86671e-27
Bsn	173.253	28.4707	2.71585	10.4832	1.03199e-25	4.40545e-24
Gabrr1	172.273	29.5144	3.63839	8.11193	4.98223e-16	1.21862e-14
Slc16a5	171.964	27.1016	2.18687	12.3929	2.85617e-35	1.99469e-33
Inka1	170.9	27.1262	2.17668	12.4622	1.1998e-35	8.45331e-34
Asic1	170.758	9.79239	2.04861	4.78001	1.75288e-06	1.80888e-05
Ssbp2	170.482	25.9779	2.1358	12.163	4.89005e-34	3.1662e-32
Pdzph1	170.417	33.253	2.99016	11.1208	9.938e-29	4.88404e-27
Fads6	170.077	26.2988	1.73402	15.1664	5.9023e-52	7.22941e-50
Oacyl	170.031	10.9375	1.81011	6.04247	1.51771e-09	2.2335e-08
Tspan7	169.718	25.2962	1.83725	13.7685	3.94263e-43	3.69285e-41
Unc5b	167.523	25.9536	1.94195	13.3647	9.72359e-41	8.36912e-39
Rims3	167.006	23.6365	2.20612	10.7141	8.7429e-27	3.89953e-25
Efcab1	166.924	26.6048	2.98671	8.90773	5.20889e-19	1.53311e-17
Gm4131	166.336	9.98914	1.55111	6.44001	1.19466e-10	1.93515e-09
Amph	166.141	26.118	2.00853	13.0035	1.16796e-38	9.29873e-37
Gpc1	164.759	26.7725	1.693	15.8136	2.5063e-56	3.53166e-54
Pcdh7	164.525	26.1237	2.33084	11.2079	3.73083e-29	1.86811e-27
Smim1	164.461	27.4833	2.57925	10.6555	1.64289e-26	7.22645e-25
Mup4	164.073	28.5681	3.29263	8.67638	4.08581e-18	1.14338e-16
AC109619.1	163.794	27.0216	1.40493	19.2334	1.94486e-82	6.88179e-80
Grm2	162.536	27.9009	3.18565	8.75829	1.98232e-18	5.66686e-17
Apoa5	161.296	26.08	2.78307	9.37093	7.18931e-21	2.37995e-19
Adarb1	160.428	23.9248	2.22493	10.7531	5.7331e-27	2.5715e-25
Shisal1	160.303	26.1329	2.17082	12.0382	2.23704e-33	1.39688e-31
Tst	160.02	25.8968	1.84029	14.0721	5.63459e-45	5.53825e-43
Gm35696	159.65	6.87841	1.7475	3.93615	8.2799e-05	0.000713811
Tmprss11b	158.42	24.0682	3.73387	6.44592	1.14898e-10	1.86685e-09
Tspan2	158.4	26.673	2.15142	12.3979	2.68384e-35	1.88259e-33
Capn15	157.532	10.8157	1.45939	7.41114	1.25216e-13	2.56604e-12
Slc4a8	156.219	27.2478	1.8891	14.4237	3.6725e-47	3.79722e-45
Gm12962	155.457	11.3618	1.58303	7.17726	7.11204e-13	1.39122e-11
Ccnjl	155.183	7.78325	1.94177	4.00834	6.11477e-05	0.000536154
Crym	154.533	25.5137	3.51872	7.25085	4.14161e-13	8.20234e-12
Tmem25	153.949	27.4962	2.43351	11.299	1.32781e-29	6.84229e-28
Brsk2	153.663	28.127	2.27768	12.3489	4.93639e-35	3.38802e-33
Rhov	153.483	26.3484	2.15606	12.2206	2.41281e-34	1.59416e-32
Lingo3	152.43	27.3442	1.83922	14.8673	5.37518e-50	6.15748e-48
Slco5a1	152.262	25.8399	2.7823	9.28725	1.58331e-20	5.1768e-19
Ticam1	152.169	9.18355	1.87254	4.90434	9.37422e-07	1.00178e-05
Pcbp3	151.925	27.3895	2.0437	13.4019	5.89294e-41	5.09964e-39
4833418N02Rik	151.617	26.41	2.0087	13.1478	1.75202e-39	1.43801e-37
Ankrd13b	151.586	27.4958	2.1213	12.9617	2.01607e-38	1.59711e-36
Rragb	151.207	25.4038	2.16655	11.7255	9.43777e-32	5.48459e-30
St6galnac6	150.355	24.3207	2.62713	9.25752	2.09228e-20	6.75767e-19
Art1	149.838	24.1992	1.85769	13.0265	8.65129e-39	6.9573e-37
Cdh13	149.323	25.5772	2.6455	9.6682	4.11561e-22	1.45306e-20
Ppfia3	148.218	24.4887	2.24987	10.8845	1.36643e-27	6.30503e-26
Gm10631	146.726	27.6265	2.66633	10.3612	3.72125e-25	1.56341e-23
Actrt3	144.969	25.5538	1.97497	12.9388	2.71815e-38	2.13207e-36
Erc2	144.863	24.9109	2.24878	11.0775	1.61238e-28	7.8274e-27
Adam9	144.768	9.81734	1.32665	7.40009	1.3609e-13	2.77459e-12
Insc	144.364	24.2764	2.93017	8.28498	1.18128e-16	3.01919e-15
Dach1	144.206	25.8611	1.65268	15.648	3.42954e-55	4.66739e-53
Apoa1	144.029	10.8952	1.37826	7.90506	2.67805e-15	6.23429e-14
Gm45104	143.656	22.8983	2.21991	10.3149	6.03275e-25	2.51465e-23
Tinagl1	142.195	27.0274	2.96105	9.12764	7.0006e-20	2.16869e-18
Naip5	142.069	28.2196	2.97265	9.4931	2.2426e-21	7.63012e-20
Irf1	141.508	24.8862	2.5022	9.94573	2.63226e-23	9.90863e-22
Klf2	140.573	25.2228	2.73115	9.23523	2.57741e-20	8.27422e-19
Dtx1	140.25	26.2847	1.73382	15.16	6.5069e-52	7.90911e-50
Rasal1	139.89	25.0655	2.23453	11.2174	3.35162e-29	1.69422e-27
Mcph1	139.309	27.2345	1.86986	14.5649	4.6936e-48	4.91686e-46
Efcc1	138.831	26.0075	2.26256	11.4947	1.40256e-30	7.67454e-29
Col18a1	138.709	27.9739	2.14623	13.0339	7.84555e-39	6.34136e-37
Abcd2	138.379	26.673	2.53408	10.5257	6.57599e-26	2.82236e-24
Cacng5	137.365	23.3519	2.65135	8.80753	1.27935e-18	3.69041e-17
Lmod1	137.304	6.80589	1.51009	4.50694	6.5769e-06	6.40122e-05
Gm30094	137.022	28.5438	2.42684	11.7617	6.14541e-32	3.59755e-30
Uty	136.948	23.6066	3.24304	7.27917	3.35887e-13	6.71058e-12
Gm1043	136.03	32.3797	1.71689	18.8594	2.45787e-79	8.32695e-77
Ankrd50	135.952	8.61272	1.7024	5.05916	4.21116e-07	4.70556e-06
Vasn	135.396	25.6721	1.78474	14.3842	6.50455e-47	6.64697e-45
Hemk1	135.016	26.5138	2.62715	10.0922	5.98004e-24	2.33956e-22
Gdap1l1	134.959	27.1294	2.49549	10.8714	1.57807e-27	7.19989e-26
Mbp	134.456	27.4195	1.67373	16.3823	2.56018e-60	4.20266e-58
Dscaml1	133.873	23.4961	2.82033	8.33095	8.01937e-17	2.07968e-15
Rab36	133.099	27.4026	1.65752	16.5322	2.14997e-61	3.68107e-59
Fetub	131.255	23.6649	2.31818	10.2084	1.81879e-24	7.31328e-23
Dll1	131.145	24.3624	2.42584	10.0429	9.87591e-24	3.79841e-22
Galnt9	131.014	27.4503	2.28878	11.9934	3.84576e-33	2.39203e-31
Arhgap24	130.888	26.2313	2.54476	10.308	6.48571e-25	2.69639e-23
Asphd2	130.608	25.4242	2.73963	9.28018	1.69198e-20	5.52078e-19
AA986860	130.277	22.344	2.57542	8.67589	4.10328e-18	1.14625e-16
Lpcat2	129.905	23.9318	2.26817	10.5511	5.01804e-26	2.15952e-24
Rassf5	129.662	25.6024	1.50005	17.0677	2.5815e-65	5.2699e-63
Syt14	127.149	26.3821	2.17966	12.1038	1.0088e-33	6.39967e-32
Tnfaip8l1	127.134	8.8931	2.12569	4.18363	2.86896e-05	0.000260002
Gm44164	126.543	25.0058	2.24879	11.1197	1.00622e-28	4.92987e-27
Cel	126.14	25.679	2.28982	11.2144	3.46481e-29	1.74589e-27
Slx4	125.376	27.2569	2.06145	13.2222	6.53174e-40	5.50291e-38
Dpysl5	125.063	25.9287	2.23076	11.6233	3.13947e-31	1.78535e-29
Gm9195	124.911	15.9862	2.2878	6.98759	2.7964e-12	5.22618e-11
Scn8a	124.54	18.0188	2.16234	8.33302	7.88028e-17	2.05029e-15
Fut1	124.016	11.1244	2.08823	5.3272	9.97396e-08	1.19861e-06
Tgfb3	123.803	7.2112	1.85884	3.87941	0.00010471	0.000892554
Hsd11b1	123.308	21.7513	4.15026	5.24095	1.5975e-07	1.87865e-06
Fam110a	122.916	7.39987	1.81005	4.0882	4.34726e-05	0.000386496
Amigo3	121.059	10.5175	2.54087	4.13934	3.48302e-05	0.000312804
Sel1l3	120.652	24.3168	2.13199	11.4057	3.91623e-30	2.08555e-28
Rnf208	120.629	26.0186	1.58124	16.4546	7.77642e-61	1.28983e-58
Plk1	120.45	20.6626	3.8551	5.3598	8.3316e-08	1.01348e-06
Ttc28	120.28	26.3065	2.00016	13.1522	1.65337e-39	1.36407e-37
Cmip	119.357	10.8136	1.85165	5.83999	5.22036e-09	7.35608e-08
Hrob	118.992	27.0304	2.61304	10.3444	4.4366e-25	1.85905e-23
Aff3	118.675	23.1409	3.81234	6.07	1.27908e-09	1.89811e-08
Rps6kl1	118.163	11.2517	2.34211	4.80407	1.55475e-06	1.617e-05
Naaa	117.645	24.2941	2.47206	9.82746	8.57572e-23	3.13911e-21
Nfkbid	116.004	27.0398	2.88057	9.38697	6.17526e-21	2.05709e-19
Cacnb2	115.563	26.1968	2.06125	12.7091	5.26082e-37	3.89619e-35
Ube2ql1	115.473	9.44451	2.36453	3.99424	6.49017e-05	0.000567195
Enpp1	115.411	24.1468	2.76391	8.73645	2.40561e-18	6.8279e-17
Clip4	115.131	26.7416	2.76396	9.6751	3.84721e-22	1.36131e-20
Slc35d3	115.122	25.0141	2.93165	8.53243	1.43309e-17	3.86109e-16
Spx	114.726	16.4711	2.82575	5.82893	5.57835e-09	7.8332e-08
Chst1	114.72	19.4842	3.04531	6.39809	1.57331e-10	2.51524e-09
Fads2	114.546	24.4847	2.94838	8.30445	1.00283e-16	2.5755e-15
Nab2	114.082	22.955	3.26322	7.03447	2.00013e-12	3.76455e-11
Slc16a7	113.855	22.5541	2.44555	9.22249	2.90288e-20	9.28165e-19
Ripor3	113.736	27.7272	2.31802	11.9616	5.64883e-33	3.48629e-31
Slc25a13	113.702	9.49601	1.77577	5.34754	8.91583e-08	1.08124e-06
Nt5dc3	113.227	6.5412	1.45654	4.49092	7.09146e-06	6.881e-05
Myof	113.129	19.4508	2.9729	6.54268	6.04246e-11	1.01599e-09
Zfp37	113.094	24.7956	3.30122	7.51106	5.86498e-14	1.23857e-12
Tshz2	112.512	19.1315	2.84189	6.73196	1.67392e-11	2.9517e-10
Gm28439	112.379	4.89229	0.620417	7.88548	3.13317e-15	7.27252e-14
Maneal	112.218	26.0154	2.07952	12.5103	6.55838e-36	4.68292e-34
Syt2	112.099	26.9852	2.48204	10.8722	1.5644e-27	7.15804e-26
Unc79	111.845	23.3044	2.34232	9.9493	2.53962e-23	9.58255e-22
Phf21b	111.639	26.4525	1.75129	15.1046	1.51077e-51	1.79522e-49
Dact2	111.18	23.7424	1.93877	12.2461	1.76264e-34	1.17927e-32
Gsg1l	110.989	12.4317	2.75251	4.5165	6.28691e-06	6.13773e-05
Akap1	110.355	25.1733	2.68	9.39301	5.83092e-21	1.94645e-19
Spock1	110.23	24.511	3.59125	6.82521	8.77956e-12	1.585e-10
Cfap61	109.758	9.49285	1.89625	5.00611	5.55424e-07	6.12891e-06
Epha8	108.98	26.2641	2.14742	12.2305	2.13536e-34	1.41672e-32
Magee1	107.872	25.2821	2.17576	11.6199	3.26608e-31	1.84418e-29
Pcsk6	107.484	23.151	2.68181	8.63262	5.99631e-18	1.65763e-16
Gm13889	107.203	23.7015	3.13754	7.55418	4.21508e-14	8.99689e-13
Serinc5	106.837	10.6229	1.74371	6.09213	1.1142e-09	1.66118e-08
Nme9	106.818	27.4628	2.27002	12.098	1.08182e-33	6.83566e-32
Oca2	106.54	25.8604	2.53057	10.2192	1.62662e-24	6.59049e-23
Btn2a2	106.066	38.9983	3.7973	10.27	9.61909e-25	3.97831e-23
Mvb12b	105.097	25.6936	1.69665	15.1438	8.32925e-52	9.97193e-50
Nectin1	105.031	27.0288	1.61678	16.7177	9.74522e-63	1.8473e-60
Upp1	103.929	18.9043	3.2805	5.76263	8.28115e-09	1.13575e-07
Tafa3	103.802	26.896	2.26478	11.8758	1.58183e-32	9.57701e-31
Gm11655	103.675	24.4182	1.80253	13.5466	8.29455e-42	7.37845e-40
Notch1	103.4	22.3656	2.20735	10.1323	3.9706e-24	1.56495e-22
Lipg	103.368	7.10506	1.58658	4.47822	7.5269e-06	7.2902e-05
Uchl1	103.31	21.1841	2.79606	7.5764	3.55277e-14	7.62408e-13
Ptger4	102.918	24.3761	2.73093	8.92595	4.41893e-19	1.31274e-17
Fam78b	102.491	10.4223	1.9197	5.42915	5.66231e-08	7.04382e-07
Spag6l	102.291	25.7746	2.6913	9.57701	9.98931e-22	3.49582e-20
Ptgs2	102.248	22.0801	3.41506	6.46552	1.00953e-10	1.65039e-09
Slain1	101.999	25.9285	1.84656	14.0416	8.67801e-45	8.37454e-43
Wdr78	101.673	11.3808	2.16399	5.25919	1.44693e-07	1.71043e-06
Tab3	101.002	8.0165	1.9822	4.04424	5.24937e-05	0.000462823
Lpcat4	100.956	24.2762	2.67663	9.0697	1.19349e-19	3.64758e-18
Unc80	100.542	11.6881	2.26704	5.15567	2.52731e-07	2.90319e-06
Aqp5	100.021	16.857	2.49098	6.76722	1.31283e-11	2.33567e-10
Rad21l	99.6727	25.4512	2.09251	12.163	4.89157e-34	3.1662e-32
Rin3	99.5844	8.95249	1.72718	5.1833	2.1799e-07	2.52257e-06
St8sia5	99.4741	24.8836	3.35879	7.40851	1.27724e-13	2.61071e-12
Slc16a2	99.3665	26.8963	2.85586	9.41794	4.60014e-21	1.54206e-19
Aldh3b1	99.3239	10.3825	2.60624	3.98372	6.78458e-05	0.00059001
Mael	98.1506	33.7906	3.57341	9.45613	3.1956e-21	1.07349e-19
Bbc3	98.1273	11.0882	2.25473	4.91776	8.75398e-07	9.41033e-06
Gm44677	98.0041	33.8447	3.70096	9.14484	5.97177e-20	1.8572e-18
Cdh2	97.9429	19.3057	2.03592	9.48253	2.48186e-21	8.40641e-20
Slc7a4	97.5662	26.1191	2.66374	9.80542	1.06707e-22	3.87038e-21
Lrrc8c	97.2949	23.4271	2.28508	10.2522	1.15726e-24	4.73702e-23
Pld5	97.2622	25.6359	2.69274	9.52038	1.72553e-21	5.92148e-20
Pdgfa	96.9821	9.02961	1.5596	5.78971	7.05096e-09	9.78836e-08
Fbxl22	96.4289	21.8694	2.00261	10.9204	9.20623e-28	4.28628e-26
Top3a	96.3648	19.0567	2.71078	7.02996	2.06599e-12	3.88392e-11
Brd3os	96.183	26.8703	2.4334	11.0423	2.38949e-28	1.14602e-26
Ssh2	95.6932	24.6506	2.03122	12.1359	6.81734e-34	4.39484e-32
Igsf3	95.248	17.2405	2.6274	6.56181	5.31591e-11	8.98569e-10
Phtf1os	94.41	25.5159	1.80648	14.1247	2.67675e-45	2.66387e-43
Meig1	94.0032	25.0958	2.11628	11.8585	1.94459e-32	1.16405e-30
Orai2	93.7927	24.9527	1.99959	12.4789	9.72659e-36	6.8834e-34
Gm20368	93.6779	26.6723	3.08983	8.63226	6.01508e-18	1.65993e-16
4732496C06Rik	93.1948	25.9088	2.52641	10.2552	1.12171e-24	4.60336e-23
Rps2-ps10	92.4989	5.99587	0.795931	7.53315	4.95296e-14	1.05295e-12
Rhbdf2	91.4677	26.2179	2.75346	9.52181	1.70183e-21	5.86541e-20
Fzd7	91.3605	23.4317	2.23818	10.4691	1.19751e-25	5.08478e-24
Fbxo31	91.0869	24.5175	2.08601	11.7533	6.79012e-32	3.96041e-30
Slc36a1	90.9996	8.47759	2.02143	4.19386	2.7425e-05	0.000249109
Gpr157	90.9212	11.6473	1.86571	6.24281	4.29782e-10	6.65055e-09
Sh2b2	90.7927	25.759	2.12281	12.1344	6.9412e-34	4.45664e-32
Prickle3	90.6186	25.8252	2.81873	9.162	5.09448e-20	1.59684e-18
Dusp5	90.3982	24.133	2.16914	11.1256	9.41608e-29	4.65628e-27
Unc93b1	89.8646	25.398	2.67019	9.51167	1.87629e-21	6.42499e-20
Ptgfrn	89.5197	22.4651	2.74359	8.1882	2.65151e-16	6.58658e-15
Slc14a1	89.4076	26.8284	2.67933	10.0131	1.33493e-23	5.08521e-22
Elovl4	88.94	24.2102	2.47595	9.77817	1.39718e-22	5.04473e-21
Acvr1	88.9219	25.8962	2.05205	12.6196	1.64594e-36	1.19672e-34
Vkorc1l1	88.6726	26.4671	1.96858	13.4448	3.30305e-41	2.87402e-39
Mfsd4a	87.9281	7.42039	1.86078	3.98777	6.66964e-05	0.000581285
Fbxw10	87.8226	24.2107	2.98028	8.12364	4.52407e-16	1.10996e-14
Lrrn3	87.8162	25.7472	4.31038	5.9733	2.32506e-09	3.39963e-08
Cap2	86.7441	39.0688	2.41749	16.1609	9.51663e-59	1.48562e-56
Abhd14a	86.7181	25.32	2.42857	10.4259	1.88917e-25	7.97912e-24
Gfod1	86.6046	8.68386	1.98644	4.37157	1.23357e-05	0.000116088
Slc43a2	86.5678	26.622	2.07272	12.844	9.2983e-38	7.22228e-36
Lrguk	86.2163	25.7144	2.37393	10.832	2.42765e-27	1.1013e-25
Mturn	86.204	23.9521	3.19237	7.5029	6.24229e-14	1.31302e-12
Als2cl	86.0493	24.1217	2.18083	11.0608	1.94311e-28	9.34748e-27
Nphp4	85.983	25.094	2.19538	11.4304	2.94833e-30	1.59681e-28
Samd14	85.6311	26.1544	2.80337	9.3296	1.06266e-20	3.50327e-19
Syp	85.5946	7.18434	1.5913	4.51476	6.33874e-06	6.18076e-05
Zfp11	85.4252	26.1329	2.69386	9.70091	2.98823e-22	1.06446e-20
Rtn4rl2	85.1189	26.606	3.09089	8.60787	7.44305e-18	2.02938e-16
Plaat1	85.1189	26.3379	2.77769	9.48193	2.49613e-21	8.42073e-20
Syngr1	85.0646	20.1101	2.3621	8.51364	1.6855e-17	4.53347e-16
Fhod3	84.9688	26.0245	2.14729	12.1197	8.3056e-34	5.31125e-32
Pla2g4a	84.8314	23.1615	3.93413	5.88732	3.92515e-09	5.60539e-08
Nudc-ps1	84.4741	9.30182	1.3487	6.89688	5.31559e-12	9.76242e-11
5330431K02Rik	84.2572	26.2196	2.47486	10.5944	3.16386e-26	1.36897e-24
Slc1a4	84.1486	23.9454	2.97041	8.0613	7.54849e-16	1.81289e-14
Dkk3	84.0736	38.3736	3.43208	11.1809	5.06028e-29	2.51796e-27
Elovl6	84.0389	19.3861	2.90154	6.68131	2.36815e-11	4.09425e-10
4933424M12Rik	83.9976	30.5536	3.80063	8.03909	9.051e-16	2.15747e-14
Snca	83.7471	25.8336	3.55327	7.27036	3.5854e-13	7.12738e-12
Gm26902	83.2224	25.8347	2.63162	9.81703	9.5103e-23	3.45736e-21
Sdr16c6	83.1992	24.9078	2.51894	9.88821	4.68346e-23	1.7424e-21
Plcxd2	83.0365	29.3578	2.87854	10.1988	2.00638e-24	8.02702e-23
Slc9a1	82.7932	9.09748	2.07075	4.39334	1.11624e-05	0.00010586
Gpr6	82.6366	25.9802	3.21279	8.08651	6.14008e-16	1.48584e-14
Gm10432	82.4019	24.6073	1.92394	12.7901	1.86237e-37	1.40543e-35
Cadps	81.9798	10.1879	2.42951	4.19339	2.74812e-05	0.000249477
Lpar2	81.9402	37.8907	3.91039	9.68976	3.33302e-22	1.182e-20
Racgap1	81.7806	25.7131	2.87055	8.95755	3.31984e-19	9.93643e-18
Lrrc73	81.4343	26.1588	1.35284	19.3362	2.66445e-83	9.64227e-81
Fam43a	80.7905	25.0938	2.23226	11.2414	2.55258e-29	1.29442e-27
Gm37479	80.7476	24.1696	2.42341	9.9734	1.99296e-23	7.53776e-22
Atp6v0c-ps2	80.5997	4.00426	0.617984	6.47955	9.19963e-11	1.51016e-09
Rps7-ps3	80.4364	3.69943	0.347438	10.6477	1.78645e-26	7.83625e-25
Iqgap2	80.2255	24.3745	2.97461	8.19418	2.52301e-16	6.28698e-15
Gpr19	79.9611	23.2445	4.85771	4.78507	1.70929e-06	1.76964e-05
Ncf1	79.6384	9.58479	2.3449	4.0875	4.36046e-05	0.000387454
Ltbp1	78.3581	18.0842	2.80272	6.45237	1.10112e-10	1.79275e-09
1700003E16Rik	77.4659	27.2514	3.14352	8.66909	4.35602e-18	1.21473e-16
Ehd4	76.8839	21.8604	2.14001	10.2151	1.6974e-24	6.8598e-23
F8	76.7089	25.2494	3.1461	8.0256	1.01029e-15	2.39387e-14
Ppp1r32	76.333	20.0708	3.13321	6.40582	1.49561e-10	2.39583e-09
Plch1	75.9211	25.1045	2.19952	11.4136	3.57581e-30	1.91066e-28
Gm14207	75.8362	23.3087	3.45266	6.75094	1.46893e-11	2.60175e-10
Ccdc9b	75.1966	26.1822	3.0351	8.62647	6.3275e-18	1.74012e-16
Ccdc40	74.6865	25.4153	2.2606	11.2427	2.51531e-29	1.28369e-27
Cabyr	74.556	21.9527	2.60973	8.41187	4.03529e-17	1.06557e-15
Dglucy	74.2418	9.63966	1.85202	5.20493	1.94067e-07	2.26716e-06
Lrrc3c	74.1336	26.3217	2.60211	10.1155	4.71566e-24	1.84944e-22
Dll4	74.0725	24.8128	2.33757	10.6148	2.54354e-26	1.10356e-24
Rtl6	74.0452	26.2851	2.05486	12.7917	1.8244e-37	1.38333e-35
Asb2	73.9134	26.6294	2.1623	12.3153	7.49569e-35	5.12248e-33
Filip1l	73.5693	26.813	3.66359	7.31879	2.5021e-13	5.02409e-12
Hdgfl3	73.372	21.4014	2.26095	9.46566	2.91702e-21	9.81981e-20
Arhgef19	72.6996	24.1694	2.90971	8.30648	9.85821e-17	2.5359e-15
Stx2	72.2614	24.7995	2.78272	8.91195	5.01405e-19	1.48124e-17
Cers1	71.9788	22.2254	2.8855	7.70244	1.33491e-14	2.9563e-13
Vinac1	71.8893	23.9499	2.51098	9.53809	1.45481e-21	5.05783e-20
Fign	71.4825	20.1128	2.71204	7.41612	1.20599e-13	2.481e-12
Gm29374	71.2825	9.52401	2.11107	4.51147	6.43793e-06	6.27361e-05
Ccdc149	71.2177	25.746	2.85982	9.00267	2.203e-19	6.66889e-18
Mindy4b-ps	71.124	25.6425	3.82611	6.70199	2.056e-11	3.57009e-10
Vav3	71.0439	24.8269	2.23287	11.1188	1.01595e-28	4.96228e-27
Sgms2	70.8788	18.9602	4.45725	4.2538	2.10173e-05	0.000193221
C2cd4a	70.3308	26.1381	3.11618	8.38788	4.94974e-17	1.29629e-15
Gm1965	69.6947	25.7503	3.91048	6.58494	4.55061e-11	7.72489e-10
Apba2	69.6109	25.7671	2.42018	10.6468	1.80542e-26	7.89774e-25
Kdm5d	69.212	24.3045	3.91089	6.21456	5.1468e-10	7.88763e-09
9330188P03Rik	68.9738	23.2714	2.83394	8.21168	2.18117e-16	5.47804e-15
Gm34220	68.8307	5.79252	1.35686	4.26906	1.96301e-05	0.000181305
Gm4791	68.7516	27.0611	4.2211	6.41092	1.44644e-10	2.32644e-09
Scx	68.494	24.0069	3.3464	7.17396	7.28597e-13	1.42175e-11
Klhl36	68.3845	23.3495	2.54887	9.16074	5.15447e-20	1.61247e-18
Clip3	68.1406	15.2993	3.09851	4.93762	7.90804e-07	8.54852e-06
Gm24187	68.0445	2.46489	0.52368	4.70687	2.51553e-06	2.55777e-05
Gm37925	67.8906	25.2917	2.21389	11.4241	3.1702e-30	1.69963e-28
Man1a	67.746	24.5486	2.41106	10.1817	2.39459e-24	9.55614e-23
Hey2	67.4288	23.3858	2.28959	10.214	1.71644e-24	6.91919e-23
Ttyh2	67.3157	25.903	2.39531	10.8141	2.95269e-27	1.33567e-25
Mks1	67.0172	25.453	2.53151	10.0545	8.77708e-24	3.40872e-22
Ksr2	66.9836	11.4105	1.65919	6.87717	6.10518e-12	1.1161e-10
Zfp629	66.8486	18.2631	3.7937	4.81406	1.47891e-06	1.54114e-05
Egln3	66.7056	21.3966	2.72202	7.86054	3.82482e-15	8.80096e-14
Qsox1	66.7023	24.618	1.87011	13.1639	1.415e-39	1.1735e-37
Crispld1	66.5806	25.8246	2.66077	9.70568	2.85167e-22	1.0181e-20
Brpf3	66.5445	11.6326	2.21999	5.23992	1.60643e-07	1.88776e-06
Gm44509	66.2123	32.9644	3.07949	10.7045	9.69503e-27	4.31212e-25
Mroh7	65.7853	24.767	3.32958	7.43848	1.01851e-13	2.11167e-12
Kif26a	65.6738	9.73081	1.88969	5.14943	2.61286e-07	2.99313e-06
Tmem176a	65.2138	18.0514	3.11383	5.79717	6.74422e-09	9.37888e-08
Ssbp4	65.191	25.7783	1.89167	13.6273	2.75647e-42	2.49382e-40
Ifi202b	65.0818	35.3719	4.92614	7.18046	6.94791e-13	1.36078e-11
Mrgpre	64.7429	26.8437	2.03391	13.1981	9.00001e-40	7.54248e-38
Btc	64.653	24.35	2.39489	10.1675	2.77056e-24	1.10014e-22
Gm3375	64.438	5.65385	0.956413	5.91152	3.38972e-09	4.88899e-08
Stx1a	64.2726	24.9952	2.46238	10.1508	3.2866e-24	1.3018e-22
Ppp1r14c	64.2679	19.4883	3.71331	5.24823	1.5357e-07	1.80731e-06
Plekhh1	64.2502	9.17151	2.07484	4.42035	9.85432e-06	9.44674e-05
Pvt1	64.1799	23.7135	2.66848	8.88651	6.30578e-19	1.84911e-17
Nol4	63.774	26.4076	3.04272	8.67895	3.99444e-18	1.11978e-16
Marchf3	63.6019	23.7718	2.66265	8.92785	4.34369e-19	1.2928e-17
Erbb2	63.2834	15.5137	3.04634	5.09256	3.53258e-07	3.99498e-06
Fam13a	62.9676	21.3101	3.31634	6.42579	1.31185e-10	2.11638e-09
Gpr61	62.9412	27.3048	2.71659	10.0512	9.08e-24	3.51778e-22
Ogdhl	62.9404	25.5625	2.24776	11.3724	5.73676e-30	3.02472e-28
Gm44829	62.6128	10.3125	2.15111	4.79403	1.63463e-06	1.69454e-05
Lrrc4c	62.311	15.9822	2.86472	5.57897	2.41948e-08	3.16301e-07
Rnf227	62.1013	24.2925	2.98884	8.12771	4.37465e-16	1.07496e-14
Nova1	61.9802	26.295	2.76868	9.49729	2.15427e-21	7.36103e-20
Skor1	61.778	26.4521	3.06651	8.62612	6.34668e-18	1.74238e-16
Zfp827	61.7507	21.0166	2.26728	9.26954	1.86954e-20	6.06288e-19
Negr1	61.4638	24.6765	2.89012	8.53821	1.36318e-17	3.67896e-16
Mars2	60.9903	25.1574	2.4841	10.1273	4.17824e-24	1.64272e-22
Loxl1	60.8892	25.4491	2.58644	9.83944	7.61301e-23	2.79958e-21
Tspan33	60.8762	25.5932	2.85241	8.97249	2.89894e-19	8.70939e-18
Myo5a	60.4921	25.0792	2.66547	9.40891	5.01323e-21	1.67701e-19
Rnf165	60.4738	19.8825	2.97341	6.68677	2.28143e-11	3.94861e-10
Gm18072	60.4483	28.7721	2.6656	10.7939	3.6803e-27	1.65541e-25
Atp2c2	60.2059	25.9144	1.86951	13.8616	1.08264e-43	1.02613e-41
Sh3rf3	60.0364	33.0088	4.31359	7.65229	1.97437e-14	4.33627e-13
Mrln	59.9969	25.8125	2.94734	8.7579	1.98924e-18	5.67647e-17
Chrm4	59.9297	10.226	2.19766	4.65311	3.26961e-06	3.2909e-05
Ano3	59.8222	23.7825	3.3375	7.12585	1.0344e-12	1.98443e-11
Hdac1-ps	59.7828	5.43667	0.993811	5.47053	4.48699e-08	5.68038e-07
Gm49937	59.7136	46.9858	4.23091	11.1054	1.18145e-28	5.753e-27
Ncam1	59.7022	25.0554	3.03367	8.25911	1.46759e-16	3.71516e-15
Map3k14	59.5347	21.6903	2.73693	7.92506	2.28029e-15	5.32391e-14
Casp3	59.294	23.8586	2.90208	8.22119	2.01491e-16	5.07649e-15
Epha2	59.0381	24.8018	2.14594	11.5575	6.7613e-31	3.76434e-29
Asic3	58.9906	23.9384	3.22358	7.42604	1.119e-13	2.308e-12
Gm45495	58.414	24.7675	1.94192	12.7541	2.95658e-37	2.21022e-35
Gramd2	58.2594	24.4503	2.62966	9.29791	1.43229e-20	4.71206e-19
Arnt2	58.1873	26.5137	2.53338	10.4658	1.24073e-25	5.25429e-24
Tspan5	57.9958	23.9444	2.41877	9.89941	4.1875e-23	1.56153e-21
Pknox1	57.8732	24.774	2.39872	10.328	5.2626e-25	2.19938e-23
Fn3k	57.6533	25.9057	2.71829	9.53012	1.57105e-21	5.42644e-20
Casr	57.5127	9.80147	1.69499	5.78263	7.3542e-09	1.01827e-07
Myo19	57.0231	26.1016	2.59236	10.0687	7.59828e-24	2.96538e-22
Adam23	56.8974	23.2028	1.90365	12.1885	3.57745e-34	2.34419e-32
Tcea1-ps1	56.8711	9.11403	1.21806	7.48241	7.29712e-14	1.52884e-12
Taf1c	56.7482	25.6911	3.45631	7.4331	1.06084e-13	2.19373e-12
Morrbid	56.4661	20.1538	4.59221	4.38868	1.14039e-05	0.000107915
Gm20075	56.3473	6.37712	1.01179	6.3028	2.92321e-10	4.5949e-09
Exph5	56.2893	20.6581	4.9496	4.17368	2.99713e-05	0.000271001
Sema7a	55.8944	10.2049	1.76975	5.76633	8.10151e-09	1.11381e-07
Sdk1	55.7365	22.728	2.22397	10.2196	1.62072e-24	6.58336e-23
Suv39h2	55.68	23.3098	3.06779	7.59824	3.00179e-14	6.47663e-13
Draxin	55.6551	8.81432	2.25589	3.90724	9.33547e-05	0.000800047
D430020J02Rik	55.4222	23.3611	2.90569	8.03977	9.00083e-16	2.14873e-14
Gm44210	55.3883	25.4287	2.24299	11.337	8.60647e-30	4.47846e-28
Tpcn2	55.2453	23.2051	4.30288	5.39293	6.93174e-08	8.52309e-07
Cmya5	55.2201	26.973	4.12543	6.53821	6.22577e-11	1.0446e-09
Whrn	55.0605	25.1845	2.8152	8.9459	3.68924e-19	1.10214e-17
Ephb3	54.9189	24.1002	3.28716	7.33162	2.2738e-13	4.583e-12
Zfp503	54.2107	22.8121	2.4836	9.1851	4.11139e-20	1.29124e-18
Gucy2c	54.0903	25.5414	3.3713	7.57611	3.56077e-14	7.63097e-13
AW011738	54.0716	19.2431	2.74098	7.02054	2.21007e-12	4.14987e-11
Gm34583	53.6684	38.4434	2.63141	14.6094	2.44655e-48	2.59709e-46
Gm13986	53.2095	25.0408	3.22731	7.75903	8.55813e-15	1.91931e-13
Slc35g2	53.1286	23.1717	3.05404	7.58721	3.26859e-14	7.03321e-13
Slc9a3r2	53.0675	25.9189	3.20248	8.09337	5.80379e-16	1.40875e-14
Ctxn1	53.0401	9.18878	2.27235	4.04373	5.26085e-05	0.000463321
Ddc	52.8487	21.4397	4.2324	5.06561	4.07102e-07	4.57143e-06
Sec16b	52.8293	15.6072	3.58784	4.35004	1.36114e-05	0.00012749
Ccdc65	52.7752	25.0002	2.75357	9.07921	1.09367e-19	3.36189e-18
Tshz3	52.3608	25.1978	2.35888	10.6821	1.23457e-26	5.47577e-25
Mgat3	52.1416	26.1229	1.97183	13.248	4.63199e-40	3.94413e-38
Gm49066	52.1173	23.4419	2.8276	8.29038	1.12887e-16	2.88986e-15
Chek1	51.842	23.3156	2.74439	8.49576	1.9665e-17	5.24498e-16
Slc9a7	51.6568	23.3445	2.58488	9.03115	1.69869e-19	5.16189e-18
Angptl2	51.5985	23.6922	2.93344	8.07658	6.66076e-16	1.60453e-14
Mmp2	51.288	24.0887	4.39108	5.48583	4.11525e-08	5.22962e-07
Psd4	51.0514	20.678	4.46624	4.62984	3.65949e-06	3.66018e-05
Erdr1	50.9887	4.50566	0.92123	4.89092	1.00366e-06	1.0697e-05
Ppargc1b	50.7405	16.0033	3.67871	4.35024	1.3599e-05	0.000127449
Adamts5	50.4599	15.131	3.48714	4.3391	1.4307e-05	0.00013377
Ankrd6	50.445	23.8011	3.44403	6.91084	4.81782e-12	8.85845e-11
Arid5b	50.3012	22.6047	2.96223	7.63095	2.33029e-14	5.07595e-13
Adtrp	49.9271	29.2958	4.95754	5.90935	3.43468e-09	4.94489e-08
Fam124a	49.4831	23.639	2.89607	8.16244	3.28323e-16	8.14312e-15
Cdcp2	48.9505	24.3131	2.56318	9.48554	2.41133e-21	8.1867e-20
Carmil3	48.873	25.1957	2.51315	10.0256	1.177e-23	4.50514e-22
Rimbp2	48.7759	19.2174	2.83816	6.77106	1.27841e-11	2.27697e-10
Spef1	48.7416	24.8903	2.12896	11.6913	1.41146e-31	8.11361e-30
Khdrbs2	48.4181	25.2668	3.23549	7.80925	5.75308e-15	1.30308e-13
Dph2	47.8854	25.6315	3.25347	7.87821	3.32108e-15	7.68628e-14
Rprm	47.7343	23.0931	3.62566	6.36936	1.89823e-10	3.01051e-09
Ddx25	47.6695	25.9248	3.31975	7.80927	5.75213e-15	1.30308e-13
Pcsk9	47.3029	19.1938	2.98052	6.43974	1.19678e-10	1.93661e-09
Lrmda	47.2731	22.6375	3.32596	6.80629	1.00145e-11	1.79979e-10
Gm48700	47.112	23.5338	2.56214	9.18524	4.10609e-20	1.29124e-18
Kif18a	46.9869	25.1914	2.93127	8.59401	8.39844e-18	2.28596e-16
Sipa1l2	46.9117	24.132	2.2719	10.622	2.35582e-26	1.02772e-24
Bend3	46.6513	24.4332	1.80523	13.5347	9.75913e-42	8.63304e-40
Adcy8	46.1077	21.6043	3.20035	6.75061	1.4722e-11	2.60465e-10
Gm42448	46.0348	24.9675	4.22857	5.90448	3.53751e-09	5.07916e-08
Trerf1	45.856	20.5955	3.30966	6.22283	4.88282e-10	7.51925e-09
Slc16a3	45.6526	24.8948	2.72455	9.13722	6.40764e-20	1.98887e-18
Gm24620	45.2416	19.5122	3.2087	6.08104	1.19405e-09	1.7769e-08
Ttc12	45.2	24.2831	2.87997	8.43171	3.4065e-17	9.02523e-16
1700066M21Rik	45.1023	25.0056	3.39293	7.36992	1.70737e-13	3.46765e-12
Jade3	45.0301	25.0943	3.73845	6.71249	1.91326e-11	3.34412e-10
Lhfpl4	44.9946	9.21733	2.39093	3.85512	0.000115673	0.000980759
AA414768	44.4511	24.7545	2.71319	9.12377	7.25561e-20	2.24332e-18
Lrrc75a	44.1491	24.7562	2.81558	8.79259	1.46153e-18	4.2083e-17
Plac8	43.9676	26.9839	4.58663	5.88316	4.02504e-09	5.73776e-08
Zfp619	43.8543	23.3605	3.61154	6.46828	9.91216e-11	1.62211e-09
2900027M19Rik	43.8339	36.8383	3.66179	10.0602	8.28326e-24	3.2248e-22
Gm44691	43.7874	26.5275	3.3691	7.87375	3.44172e-15	7.95393e-14
Areg	43.6909	24.5048	3.62564	6.75875	1.39189e-11	2.46805e-10
Sec14l4	43.5308	24.9173	4.32239	5.76471	8.17991e-09	1.12283e-07
Fam185a	43.4693	24.5817	3.13365	7.84443	4.34931e-15	9.92179e-14
Rps3a2	43.246	6.03095	1.10973	5.43462	5.49146e-08	6.85271e-07
Slc27a3	43.1648	25.0734	4.7739	5.25218	1.50311e-07	1.7742e-06
Sema4c	42.7051	21.6708	2.89878	7.47584	7.67143e-14	1.60305e-12
Stmn3	42.5768	24.7826	3.15189	7.86276	3.75749e-15	8.65853e-14
D430040D24Rik	42.4222	20.0749	3.57415	5.61669	1.94656e-08	2.57648e-07
Nfasc	42.3553	24.2201	2.6273	9.21863	3.00921e-20	9.58312e-19
Zfp184	42.2983	24.0128	3.56573	6.73434	1.64672e-11	2.90696e-10
Ifrd2	42.2453	24.4178	2.66602	9.1589	5.24309e-20	1.63698e-18
Cers6	41.7769	24.3539	3.69288	6.59482	4.25766e-11	7.24303e-10
Ttc30a1	41.737	24.7216	3.10349	7.96574	1.64244e-15	3.87445e-14
Sycp2	41.7355	24.6388	3.77886	6.52015	7.02349e-11	1.16738e-09
Stat6	41.2764	21.0726	2.56871	8.20358	2.33332e-16	5.84174e-15
Ube2cbp	41.2172	25.7706	3.43274	7.50732	6.03513e-14	1.27113e-12
Acaa2	41.1843	25.2494	3.92318	6.43595	1.22703e-10	1.98356e-09
Abca6	41.1136	28.5564	2.87742	9.92429	3.26428e-23	1.22299e-21
Prph2	41.0464	24.3279	4.0651	5.98456	2.16972e-09	3.17833e-08
Snhg10	40.9164	7.20044	1.58101	4.55433	5.25529e-06	5.17502e-05
B4galnt4	40.6725	25.1724	3.20689	7.84947	4.17806e-15	9.57225e-14
Tsku	40.1164	20.9568	2.70676	7.74239	9.75687e-15	2.17894e-13
Calcrl	39.9168	24.1794	3.56687	6.77888	1.21111e-11	2.16195e-10
Dus4l	39.7623	25.0203	3.38288	7.39617	1.40171e-13	2.8505e-12
Dynlrb2	39.7372	23.0186	3.15077	7.30569	2.75852e-13	5.53198e-12
Ghsr	39.6263	25.4112	4.92023	5.16463	2.4092e-07	2.7718e-06
9030407P20Rik	39.5456	24.8955	4.71221	5.28319	1.26952e-07	1.51194e-06
Nat14	39.5119	25.5736	2.86966	8.9117	5.02558e-19	1.48189e-17
Tead4	38.8409	24.9425	1.99568	12.4982	7.63161e-36	5.42492e-34
Impg1	38.7632	21.9715	4.44181	4.94653	7.55491e-07	8.2082e-06
Fgd1	38.6574	25.7028	2.00354	12.8287	1.13276e-37	8.67159e-36
Snx20	38.2319	9.8208	2.26294	4.33984	1.42584e-05	0.000133394
Nrxn2	38.1383	8.9782	1.80493	4.97427	6.54955e-07	7.16267e-06
Cd79b	37.8553	26.0844	2.87685	9.06698	1.22362e-19	3.72536e-18
Samd5	37.6098	24.8336	3.73532	6.64832	2.9645e-11	5.0866e-10
Pde4d	37.5759	7.62471	1.39215	5.47694	4.32748e-08	5.48618e-07
Rnf224	37.3876	24.4462	3.75823	6.50471	7.78419e-11	1.28576e-09
Krt33a	37.3828	23.5301	4.7282	4.97655	6.47291e-07	7.08372e-06
Gm26953	37.3468	21.5469	3.16905	6.79915	1.05238e-11	1.88705e-10
Gm6969	37.3303	6.7595	1.39891	4.83198	1.35181e-06	1.4226e-05
Krt222	37.3261	19.2555	4.47255	4.30526	1.66792e-05	0.00015513
Cdh4	37.2908	21.7085	3.31584	6.54689	5.87457e-11	9.88803e-10
Klk1b9	37.2855	25.7637	3.47429	7.41554	1.21132e-13	2.48875e-12
A430010J10Rik	37.1865	24.4338	3.17743	7.68979	1.47375e-14	3.25924e-13
Gm10282	37.1251	6.29574	1.12047	5.61886	1.92217e-08	2.54757e-07
Cd3g	37.0961	23.995	3.40268	7.05179	1.76632e-12	3.34425e-11
Irf8	37.0675	24.4956	2.52706	9.69331	3.21924e-22	1.1442e-20
Hrh3	37.0054	25.914	2.93768	8.82127	1.13171e-18	3.2764e-17
Kitl	36.9219	23.8935	3.85586	6.19666	5.76753e-10	8.81347e-09
A230051N06Rik	36.9219	24.0768	3.30874	7.27673	3.42018e-13	6.82451e-12
Kndc1	36.7377	24.7219	2.24779	10.9983	3.89249e-28	1.85569e-26
Sdcbp2	36.3308	26.2603	3.0212	8.692	3.56116e-18	1.00362e-16
E2f1	36.3198	25.3503	2.79466	9.07097	1.1796e-19	3.61208e-18
Bmp7	35.9078	22.3969	2.97462	7.52932	5.10043e-14	1.07998e-12
Gm7046	35.8347	9.3883	2.12712	4.41362	1.01658e-05	9.70446e-05
Nkain2	35.7237	24.5518	3.12753	7.85023	4.15281e-15	9.52813e-14
Gm10865	35.6783	7.76695	1.95448	3.97392	7.07003e-05	0.000613828
Gm37064	35.5723	24.5396	2.78504	8.81121	1.23808e-18	3.57784e-17
Ap5b1	35.5261	22.841	3.77043	6.05792	1.37897e-09	2.03686e-08
Gm35585	35.4736	25.5576	2.95259	8.65599	4.88655e-18	1.36029e-16
6430571L13Rik	35.262	23.5525	3.09519	7.60939	2.75383e-14	5.96589e-13
Tmem178b	35.1606	25.0702	2.12801	11.781	4.88878e-32	2.88311e-30
Gm15751	34.6051	25.2904	1.96503	12.8702	6.6202e-38	5.16733e-36
Dlgap3	34.2687	26.0488	2.48356	10.4885	9.75541e-26	4.17568e-24
Gm47882	34.1097	8.49479	1.6347	5.19653	2.03045e-07	2.36683e-06
Mrap2	33.8013	25.2113	3.52744	7.1472	8.8565e-13	1.70936e-11
Sprtn	33.7868	21.2435	3.31208	6.41395	1.41795e-10	2.28291e-09
Zfp3	33.7197	22.5599	3.35372	6.72684	1.73386e-11	3.05401e-10
Timp3	33.6816	22.0509	2.54754	8.65575	4.89666e-18	1.36072e-16
Gm48092	33.3648	24.2305	3.93164	6.16297	7.13937e-10	1.07754e-08
Vgf	33.0031	22.9626	2.76406	8.30754	9.77064e-17	2.51744e-15
Gm4864	32.9521	25.2764	1.98966	12.7038	5.62945e-37	4.1499e-35
Gm45338	32.862	22.4765	4.51421	4.97905	6.38969e-07	6.99746e-06
Mms22l	32.8351	24.5821	3.65498	6.72564	1.74824e-11	3.07594e-10
A930017M01Rik	32.7508	24.3706	3.49178	6.9794	2.96439e-12	5.53364e-11
Camk2n2	32.4872	7.29407	1.86724	3.90633	9.37077e-05	0.00080264
Hes5	32.4108	24.607	2.66002	9.25069	2.2304e-20	7.17466e-19
Klk1b26	32.3497	22.2207	3.26601	6.80364	1.02005e-11	1.83114e-10
C130013H08Rik	32.288	26.0383	2.86947	9.07426	1.14447e-19	3.51127e-18
Gm37060	32.288	17.5031	2.68339	6.52277	6.90191e-11	1.14957e-09
Ankrd45	32.018	24.3362	3.12242	7.79399	6.49234e-15	1.46635e-13
Cyth4	32.015	25.4652	4.17676	6.09688	1.08162e-09	1.61562e-08
Zfp882	31.9886	24.8493	3.07978	8.06853	7.1148e-16	1.71131e-14
A530072M11Rik	31.9285	24.5674	4.28536	5.73286	9.8752e-09	1.34052e-07
Tmem158	31.8553	23.563	4.21553	5.58957	2.27631e-08	2.98811e-07
Rhebl1	31.8146	23.0029	3.91903	5.86953	4.37024e-09	6.19656e-08
Dhrs13	31.6732	23.572	3.18461	7.40186	1.34295e-13	2.74151e-12
Gm12892	31.0838	4.38414	0.735787	5.95844	2.5466e-09	3.70315e-08
Ablim1	31.026	24.1427	3.24838	7.43222	1.06794e-13	2.20554e-12
A830018L16Rik	30.978	26.1524	4.65721	5.61545	1.9605e-08	2.59063e-07
Gm42888	30.8847	26.0568	4.56593	5.70678	1.15133e-08	1.55493e-07
Rab6b	30.7103	25.1786	2.53613	9.92797	3.14585e-23	1.1814e-21
Zfp647	30.6749	24.1365	3.668	6.5803	4.69501e-11	7.96152e-10
Shisa4	30.4033	23.9004	3.01451	7.92846	2.2188e-15	5.18795e-14
Slc25a48	30.3796	25.743	3.42781	7.51002	5.91181e-14	1.2468e-12
Gm44005	30.3025	25.9103	3.66444	7.07074	1.54115e-12	2.92836e-11
Pax2	29.9892	9.18953	1.82205	5.0435	4.57093e-07	5.10041e-06
9930012K11Rik	29.9035	22.2171	3.08115	7.21067	5.56786e-13	1.09588e-11
Tceal3	29.8954	25.0611	2.64292	9.48233	2.4866e-21	8.40641e-20
Myo5b	29.101	19.7112	3.43066	5.74561	9.15924e-09	1.25187e-07
Mansc4	29.05	14.6673	3.61607	4.05616	4.9887e-05	0.000440572
Agbl4	29.023	24.0449	2.78949	8.6198	6.70735e-18	1.83823e-16
Rapgef3	28.9583	24.6623	4.68482	5.26431	1.4072e-07	1.66594e-06
B230206I08Rik	28.9468	23.7495	3.62603	6.54972	5.76434e-11	9.71276e-10
Samd11	28.9416	18.2032	3.47912	5.23213	1.67572e-07	1.96628e-06
Rln3	28.8888	25.3846	4.57222	5.55191	2.82564e-08	3.6639e-07
Krt87	28.847	22.2275	3.31061	6.71402	1.8934e-11	3.31303e-10
Zc3h12b	28.7316	24.2502	2.7926	8.68373	3.8301e-18	1.0775e-16
Slc22a4	28.5771	25.6165	4.64989	5.50905	3.6077e-08	4.62523e-07
Sik1	28.3158	23.3051	1.92446	12.11	9.35445e-34	5.95804e-32
Stox1	28.1351	25.8089	2.86811	8.99857	2.28675e-19	6.90929e-18
Efr3b	27.833	20.1456	3.17765	6.33976	2.30117e-10	3.62788e-09
Pomc	27.6399	23.2104	3.47528	6.67869	2.41082e-11	4.1635e-10
2900052L18Rik	27.5804	21.8418	2.8751	7.5969	3.03314e-14	6.53542e-13
Gm43728	27.2613	21.9585	3.58166	6.13082	8.74275e-10	1.31207e-08
1700056N10Rik	27.2078	23.8521	3.69763	6.45064	1.1138e-10	1.81155e-09
Aldh1b1	27.1487	24.1215	3.76997	6.39832	1.57098e-10	2.51404e-09
Slco2a1	27.0135	17.7705	2.82544	6.28946	3.18569e-10	4.98779e-09
Gm37407	26.9269	24.5989	3.14866	7.8125	5.60642e-15	1.27348e-13
Mettl5os	26.8404	23.9391	3.92815	6.09424	1.09957e-09	1.64091e-08
Gm16701	26.6796	25.4288	3.03717	8.37253	5.63962e-17	1.47213e-15
Gm30373	26.6534	29.0409	3.20271	9.06759	1.21684e-19	3.71183e-18
Gm10558	26.5969	21.1497	3.23794	6.53186	6.49593e-11	1.0865e-09
Fam131a	26.5328	24.6531	2.95091	8.3544	6.57652e-17	1.71388e-15
Gm27239	26.4104	23.309	1.76227	13.2267	6.15243e-40	5.21091e-38
Prdm16	26.0476	21.2211	3.31191	6.40752	1.47908e-10	2.37414e-09
Them7	26.0419	15.091	3.8265	3.94383	8.01915e-05	0.000692832
Gpr62	25.9471	24.2991	2.77849	8.74544	2.22158e-18	6.31682e-17
Gm47076	25.936	24.5648	3.09203	7.94455	1.949e-15	4.57053e-14
Grk5	25.9326	24.8829	3.03802	8.1905	2.60142e-16	6.47226e-15
Gm47725	25.8871	24.4625	4.65794	5.25178	1.50635e-07	1.77539e-06
Gm49215	25.8802	23.9738	2.98586	8.02914	9.81614e-16	2.33287e-14
3000002C10Rik	25.7625	25.1722	3.80908	6.60848	3.88276e-11	6.61231e-10
Star	25.7366	25.3493	3.55721	7.12616	1.03207e-12	1.98235e-11
Srrm4os	25.471	23.1936	2.84901	8.14094	3.92224e-16	9.66779e-15
Ctnna2	25.0535	20.0224	4.1559	4.81783	1.45132e-06	1.51437e-05
Lum	25.0134	14.1137	2.97388	4.74587	2.07609e-06	2.13274e-05
Bambi	24.9577	23.2656	4.214	5.52104	3.37005e-08	4.34249e-07
Cdhr3	24.8528	23.7405	3.29182	7.21197	5.51475e-13	1.08677e-11
Lrg1	24.7905	24.9431	3.78619	6.58791	4.4607e-11	7.58033e-10
Eaf2	24.7565	22.3771	4.48679	4.98733	6.12194e-07	6.7181e-06
Fam161a	24.717	14.91	2.37592	6.27547	3.48576e-10	5.43089e-09
Hjv	24.67	26.3337	4.05533	6.49359	8.38159e-11	1.38014e-09
Zfp286	24.5032	24.519	3.29366	7.4443	9.74618e-14	2.02332e-12
Chit1	24.3748	24.4066	4.1528	5.87713	4.17442e-09	5.92946e-08
Mis18a	24.3579	22.9378	3.02451	7.58395	3.35182e-14	7.20257e-13
Gm4675	24.2971	21.1094	4.34582	4.8574	1.18938e-06	1.26172e-05
Soga3	24.2213	22.564	3.5139	6.42134	1.35076e-10	2.17694e-09
Pycr1	24.181	24.3046	3.62192	6.71042	1.94069e-11	3.38463e-10
Fgd2	23.5427	25.0634	2.91073	8.61068	7.26282e-18	1.98363e-16
Dhcr24	23.3686	23.5813	3.42797	6.8791	6.02338e-12	1.10242e-10
Nlrp6	23.0901	25.2735	4.57857	5.51995	3.39089e-08	4.36132e-07
Gm12751	23.0486	6.24041	1.47839	4.22107	2.43142e-05	0.000221865
Pdk4	22.7583	17.2668	3.80928	4.53282	5.82002e-06	5.69939e-05
H3f3a-ps1	22.657	3.34449	0.747331	4.47525	7.63236e-06	7.38785e-05
Svopl	22.6486	23.5135	3.54774	6.62774	3.40861e-11	5.82353e-10
Acot6	22.5567	22.784	3.02504	7.53181	5.00423e-14	1.06102e-12
Ranbp17	22.387	24.9482	2.89183	8.62714	6.29051e-18	1.73294e-16
Lypd1	22.3353	25.2386	2.80567	8.99558	2.3499e-19	7.08664e-18
Gm37390	22.3005	25.1976	3.23976	7.77761	7.39074e-15	1.66454e-13
Mesp2	22.0124	25.5538	4.92024	5.19362	2.06244e-07	2.39885e-06
Ina	21.9943	24.714	3.6259	6.81596	9.36332e-12	1.68466e-10
Grasp	21.8571	25.2246	3.00079	8.40599	4.24266e-17	1.11663e-15
Klhl5	21.7271	24.142	3.32624	7.25806	3.92691e-13	7.78683e-12
1110006O24Rik	21.4866	23.642	2.99334	7.8982	2.82964e-15	6.57757e-14
Gpr162	21.4608	24.4267	2.05356	11.8948	1.25901e-32	7.68092e-31
Mxd3	21.4361	24.9744	3.37016	7.41044	1.25879e-13	2.57631e-12
Dnah7b	21.3416	24.6662	2.63113	9.37476	6.93318e-21	2.30474e-19
Klk1b11	21.0826	21.2965	4.92308	4.32584	1.51951e-05	0.000141824
Gm49322	20.7157	24.7205	2.75158	8.9841	2.60868e-19	7.85218e-18
Ppp1r3b	20.5165	22.7098	2.95334	7.68951	1.47695e-14	3.26179e-13
Steap3	20.4685	24.9351	4.17978	5.96565	2.43661e-09	3.54798e-08
Rnf17	20.4609	17.5453	4.3828	4.00321	6.24888e-05	0.000547611
Adgra2	20.3946	24.4033	3.31406	7.36358	1.79046e-13	3.62717e-12
Tspyl5	20.3582	22.8462	2.9863	7.65033	2.00469e-14	4.39678e-13
4930473A02Rik	20.3288	22.1012	4.5588	4.84804	1.24686e-06	1.31743e-05
Zfp449	20.3212	23.8091	4.65553	5.11416	3.15137e-07	3.57912e-06
AI480526	20.3009	22.7438	2.12969	10.6794	1.27059e-26	5.6199e-25
4930448D08Rik	20.2209	22.8517	3.86214	5.91684	3.28183e-09	4.74628e-08
Frs3	19.9157	17.5638	3.22905	5.43929	5.34931e-08	6.6858e-07
Spef2	19.8764	24.3357	2.59613	9.37383	6.99467e-21	2.32034e-19
Slc19a2	19.8081	15.8233	2.9348	5.39162	6.98245e-08	8.57883e-07
Ccno	19.6132	23.3082	4.07528	5.71942	1.0689e-08	1.44851e-07
Rtn4r	19.6011	23.5805	4.60485	5.1208	3.04241e-07	3.45784e-06
Foxo6	19.4992	24.6932	3.03319	8.14099	3.92053e-16	9.66779e-15
Reps2	19.4582	20.4475	4.03387	5.06896	3.99993e-07	4.49477e-06
Cys1	19.4144	19.0073	2.98398	6.36978	1.89306e-10	3.0053e-09
Gm17108	19.4014	21.9474	3.34223	6.5667	5.14418e-11	8.70466e-10
Tnfrsf13c	19.3953	25.0481	4.92028	5.09078	3.56585e-07	4.02688e-06
Fat1	19.3562	22.2552	2.91897	7.62434	2.45294e-14	5.32854e-13
Kctd8	19.354	19.6768	3.98287	4.94036	7.79774e-07	8.44075e-06
Acot11	19.3044	28.4933	4.81896	5.91275	3.36443e-09	4.85692e-08
Gm13868	19.1522	23.8032	3.17812	7.48972	6.90222e-14	1.44801e-12
Gm50292	19.1384	24.3383	3.62483	6.71434	1.88925e-11	3.30941e-10
Spata33	19.0424	23.7549	4.02297	5.9048	3.53073e-09	5.07398e-08
Il15	19.0415	39.9239	4.9219	8.11147	5.00109e-16	1.22136e-14
9230112E08Rik	19.0307	24.2819	3.57306	6.79582	1.07701e-11	1.92484e-10
Samd12	18.7734	26.1316	4.9202	5.31108	1.0898e-07	1.30374e-06
Cyp11a1	18.7581	21.6865	3.12197	6.94641	3.74689e-12	6.96169e-11
Pop1	18.7394	18.5049	3.47156	5.33042	9.79848e-08	1.1793e-06
Plekha2	18.6093	25.6831	4.95581	5.18242	2.19028e-07	2.53274e-06
St6galnac2	18.4891	16.0294	3.83999	4.17433	2.98866e-05	0.000270389
Syt9	18.1733	31.0628	4.48449	6.92672	4.3071e-12	7.93773e-11
Svop	18.0116	21.8907	3.27299	6.68829	2.2579e-11	3.91213e-10
Bex1	17.9788	24.1616	3.42355	7.05748	1.69552e-12	3.21403e-11
Rbfox1	17.9488	24.1542	4.92043	4.90896	9.15626e-07	9.81786e-06
Gm6166	17.9058	7.47061	1.65227	4.52141	6.14281e-06	6.0118e-05
Dgki	17.8845	19.5097	3.41835	5.70733	1.14761e-08	1.55122e-07
Gm19427	17.6605	19.6897	3.37362	5.83637	5.33499e-09	7.50433e-08
Gpd1	17.6534	23.3856	2.82353	8.28241	1.20708e-16	3.07525e-15
Cd36	17.6456	28.5418	4.95581	5.75926	8.44846e-09	1.1577e-07
Zfp251	17.5393	23.83	2.87438	8.29048	1.12796e-16	2.88986e-15
C4a	17.3506	23.4308	4.07913	5.74407	9.24281e-09	1.26113e-07
Sirpa	17.2557	22.5719	3.66296	6.16219	7.17455e-10	1.08182e-08
Gm45453	16.9331	22.5264	3.07427	7.32738	2.34697e-13	4.72451e-12
Slc24a2	16.8607	23.6268	3.2806	7.20197	5.93505e-13	1.16671e-11
Gm2762	16.8595	24.3616	4.92035	4.95118	7.37639e-07	8.02832e-06
Cox5b-ps	16.8512	2.75186	0.644008	4.27303	1.92838e-05	0.000178314
Rab44	16.773	24.8127	4.92029	5.04293	4.58463e-07	5.11212e-06
1700056E22Rik	16.6875	20.8615	4.00284	5.21167	1.87146e-07	2.19274e-06
Gm31105	16.3193	23.0041	3.73237	6.1634	7.11991e-10	1.07562e-08
Dnase1l2	16.3074	22.5521	3.8185	5.906	3.50508e-09	5.04168e-08
Osgin1	16.278	30.1735	4.93567	6.11337	9.75507e-10	1.46262e-08
Ccnb2-ps	16.1132	25.4229	4.95838	5.12726	2.93987e-07	3.34368e-06
Gm11240	16.0055	25.0849	4.38919	5.71515	1.0961e-08	1.48412e-07
Pgap3	15.9395	24.8343	4.7889	5.18582	2.15069e-07	2.49058e-06
Ovol1	15.9025	23.1435	4.92083	4.70317	2.56156e-06	2.60291e-05
Nnat	15.858	21.3362	3.39504	6.28452	3.28875e-10	5.1409e-09
Gm10244	15.8283	23.0324	3.79755	6.06507	1.31895e-09	1.95547e-08
Serpinf1	15.7524	25.5451	4.0139	6.36416	1.96367e-10	3.1081e-09
Tmem28	15.6306	23.4372	3.24699	7.21812	5.27112e-13	1.04005e-11
Asprv1	15.5971	26.4614	4.95725	5.33792	9.40198e-08	1.13456e-06
4930466K18Rik	15.5851	34.833	3.76011	9.26381	1.97269e-20	6.38437e-19
Gm48261	15.4796	25.9773	4.92023	5.27968	1.29407e-07	1.53887e-06
Itga2	15.3837	25.0548	4.92027	5.09216	3.54005e-07	4.00059e-06
3110070M22Rik	15.3187	21.7153	4.43509	4.89624	9.76889e-07	1.04256e-05
Gm35576	15.2811	22.7087	4.53336	5.00924	5.46453e-07	6.0341e-06
Pm20d2	15.1722	24.5885	2.99951	8.19751	2.4542e-16	6.13474e-15
Gm6345	15.1542	18.8827	4.26011	4.43244	9.31709e-06	8.95869e-05
Gtf2h4	15.0855	17.3726	3.74017	4.64486	3.403e-06	3.41437e-05
2810021J22Rik	15.0546	23.0792	4.92089	4.69004	2.73153e-06	2.76856e-05
Ap1s2	14.983	24.1739	4.13114	5.85163	4.86769e-09	6.8835e-08
Far2	14.6954	23.295	2.82112	8.25735	1.48942e-16	3.76446e-15
B130055M24Rik	14.5051	23.0253	3.35433	6.86435	6.6796e-12	1.21693e-10
Zmat4	14.3087	18.6264	3.30253	5.64003	1.70018e-08	2.26733e-07
9430091E24Rik	14.116	23.9664	4.92043	4.8708	1.1115e-06	1.18226e-05
Eif4ebp1	14.1147	24.0921	4.9205	4.89626	9.76776e-07	1.04256e-05
Tnfrsf22	14.0436	16.3973	3.71376	4.41529	1.00874e-05	9.63536e-05
Cfap299	13.678	23.6251	3.79103	6.23186	4.60934e-10	7.11877e-09
Elavl4	13.5581	24.3694	4.92036	4.95277	7.31656e-07	7.96864e-06
B3gnt7	13.2479	24.3947	4.60651	5.2957	1.1856e-07	1.4141e-06
Gprin1	13.2451	23.8438	4.92062	4.84569	1.2617e-06	1.33223e-05
Nefl	13.2085	25.358	4.45189	5.69601	1.22643e-08	1.65076e-07
Abcc4	13.2046	17.682	3.88814	4.54767	5.42422e-06	5.33147e-05
Gm48998	13.1307	24.4049	4.53792	5.37798	7.53265e-08	9.2051e-07
Padi1	13.0912	7.22406	1.7086	4.22805	2.35725e-05	0.000215344
Gm36951	13.0212	24.1062	4.04089	5.96558	2.43766e-09	3.54798e-08
Gm43200	13.0076	24.1084	2.87903	8.37379	5.57927e-17	1.45876e-15
Gm22107	12.8201	23.1264	3.37065	6.86111	6.83269e-12	1.24197e-10
Gm5294	12.8131	24.6715	4.92034	5.01419	5.32576e-07	5.88904e-06
Gm13269	12.7538	23.3269	4.11057	5.67485	1.38807e-08	1.86202e-07
E430021H15Rik	12.7042	18.8076	3.24161	5.80193	6.55561e-09	9.13254e-08
Htr6	12.6926	20.3777	3.12827	6.51405	7.31522e-11	1.21334e-09
Gm42640	12.5337	21.2652	4.92321	4.31937	1.56474e-05	0.00014596
Krt79	12.3895	39.8005	4.9203	8.08905	6.01333e-16	1.45739e-14
B230307C23Rik	12.387	23.1121	2.50633	9.22148	2.93017e-20	9.35013e-19
Adam33	12.382	22.817	4.17373	5.46682	4.58189e-08	5.79487e-07
Gm43268	12.3643	23.4448	4.02214	5.82892	5.57862e-09	7.8332e-08
Plppr2	12.3632	21.3438	3.89129	5.48501	4.13446e-08	5.24984e-07
Adamts17	12.3604	22.7986	4.06984	5.60184	2.1209e-08	2.79794e-07
Noxred1	12.3581	23.7522	3.83358	6.19582	5.79806e-10	8.85163e-09
Gm50454	12.339	24.2977	3.81778	6.36436	1.96107e-10	3.10707e-09
Pcdhac2	12.2448	25.5586	4.44277	5.75284	8.77568e-09	1.20151e-07
Gm44633	12.2149	21.325	2.89546	7.36497	1.77184e-13	3.59402e-12
Gpsm1	12.1722	17.9239	3.84312	4.66389	3.10288e-06	3.12703e-05
Septin1	12.1411	22.7793	4.32571	5.26602	1.3941e-07	1.65165e-06
Gm13132	12.124	24.1441	3.16031	7.63977	2.17613e-14	4.75315e-13
Lrp3	12.0646	24.9581	4.92029	5.07248	3.92662e-07	4.41863e-06
Gm35909	11.8831	23.5066	4.7114	4.9893	6.05991e-07	6.65461e-06
Gm32585	11.8297	22.456	4.92367	4.56082	5.09539e-06	5.03e-05
Stk26	11.6847	25.0466	4.92042	5.09035	3.57399e-07	4.03322e-06
Mroh3	11.6831	27.0606	4.95619	5.45997	4.7621e-08	5.99896e-07
Ngb	11.6437	35.9394	4.92034	7.30425	2.78811e-13	5.57727e-12
Gm10461	11.6356	22.7298	3.30187	6.88391	5.82323e-12	1.06824e-10
Grb10	11.6025	19.4012	3.7491	5.17491	2.28026e-07	2.63106e-06
Glcci1	11.4692	6.94943	1.77954	3.90518	9.41536e-05	0.000806026
Rps18-ps3	11.3754	5.80355	1.00952	5.74883	8.98633e-09	1.22929e-07
Gm17733	11.3548	23.4126	4.92074	4.75795	1.95572e-06	2.01039e-05
Chd5	11.2877	23.5803	3.35147	7.03581	1.98107e-12	3.73309e-11
Ccn2	11.2303	17.1704	3.47451	4.94182	7.73967e-07	8.3893e-06
Gm49025	11.2044	24.1932	4.84813	4.99022	6.03109e-07	6.62754e-06
Meis1	11.1946	35.6543	4.93406	7.22616	4.96859e-13	9.81575e-12
Tent5b	11.0779	22.1114	3.97615	5.561	2.68231e-08	3.48657e-07
Gm15853	10.9938	22.2127	4.88573	4.54645	5.45571e-06	5.35581e-05
Cybrd1	10.9034	31.7467	4.45132	7.13198	9.89319e-13	1.90253e-11
Cacna1e	10.824	23.5104	4.19852	5.59968	2.1475e-08	2.83068e-07
Zfp324	10.7008	23.9329	3.84828	6.21912	4.99965e-10	7.6843e-09
Gm43266	10.6945	34.4832	4.92041	7.00819	2.41419e-12	4.52781e-11
Gm13525	10.6806	23.8493	4.02807	5.92078	3.20426e-09	4.64676e-08
Gm43201	10.5954	22.4434	4.92124	4.56051	5.10298e-06	5.03437e-05
Tmem130	10.5591	22.7008	3.55916	6.37814	1.79249e-10	2.85133e-09
Etaa1os	10.4842	24.0782	2.97479	8.09408	5.77e-16	1.40268e-14
Tox2	10.4794	27.669	4.9446	5.59581	2.19599e-08	2.88742e-07
Gm48766	10.4454	14.8453	3.33342	4.45349	8.44867e-06	8.16807e-05
Zkscan2	10.3974	26.1841	4.85023	5.39853	6.71881e-08	8.27406e-07
Ttc41	10.3963	20.9703	3.62515	5.78467	7.26561e-09	1.00688e-07
Npas3	10.394	18.1859	3.16983	5.73717	9.62706e-09	1.31243e-07
Gm47920	10.3727	21.8627	4.95838	4.40924	1.03734e-05	9.89079e-05
Gm42636	10.2248	21.1979	3.50105	6.05471	1.4067e-09	2.07589e-08
Gm30015	10.2097	24.6523	4.92035	5.01027	5.43545e-07	6.00615e-06
Gm37959	10.1609	30.5984	4.92266	6.21581	5.10593e-10	7.84009e-09
Pfkfb4	10.063	21.7516	4.92197	4.41929	9.90277e-06	9.48176e-05
Ranbp3l	10.0091	21.6669	4.90429	4.41796	9.96385e-06	9.53452e-05
Col4a6	9.97207	25.4824	4.95617	5.14156	2.72472e-07	3.11455e-06
Bmf	9.88227	23.162	4.54055	5.10114	3.37611e-07	3.8289e-06
Slc7a11	9.80189	5.80228	1.12091	5.17638	2.26237e-07	2.6123e-06
Gm15972	9.77044	23.7787	3.08682	7.7033	1.32599e-14	2.94063e-13
Kcnq1	9.74582	23.7758	3.5424	6.71177	1.92275e-11	3.35701e-10
4833412C15Rik	9.61235	18.1745	4.03321	4.50622	6.59931e-06	6.41911e-05
4930503L19Rik	9.58004	25.1387	4.49699	5.59013	2.26906e-08	2.98104e-07
Stx19	9.53694	28.8277	4.93558	5.8408	5.19523e-09	7.32716e-08
Gm45629	9.5368	20.2896	3.50949	5.78135	7.4105e-09	1.02517e-07
Gm5173	9.51631	18.1213	3.84851	4.70864	2.49378e-06	2.54054e-05
Fibcd1	9.49556	22.2878	4.11986	5.40985	6.30784e-08	7.80418e-07
Zfp518b	9.48742	21.2588	3.0618	6.94325	3.83183e-12	7.10293e-11
Lin28a	9.25496	22.753	4.92092	4.62373	3.76903e-06	3.76501e-05
Eno2	9.22535	37.8644	4.57798	8.27098	1.3286e-16	3.36869e-15
Hmgn2-ps1	9.18099	2.64675	0.585471	4.52072	6.16293e-06	6.02778e-05
Gm6421	9.08934	3.8391	0.900586	4.26289	2.01796e-05	0.000186112
Dbf4	9.08435	34.9175	4.92178	7.09449	1.29827e-12	2.47845e-11
Slc1a2	9.04318	25.0982	4.92034	5.10091	3.38017e-07	3.83078e-06
Arrb2	8.95395	22.0279	3.06974	7.17581	7.18788e-13	1.40433e-11
Snai2	8.91625	22.5807	4.92121	4.58846	4.46536e-06	4.43555e-05
Abcd1	8.80295	18.0218	3.57234	5.04481	4.53976e-07	5.06918e-06
Ifi30	8.76134	20.3628	2.96731	6.86239	6.77172e-12	1.2323e-10
Tmem81	8.71133	21.6286	4.92231	4.39401	1.11281e-05	0.000105598
Reep1	8.66173	34.8185	4.93058	7.06175	1.64414e-12	3.12034e-11
Rwdd2a	8.63848	23.003	4.09587	5.61615	1.95261e-08	2.58234e-07
Lrig3	8.57598	19.6561	4.93043	3.98669	6.70025e-05	0.000583633
Gm10357	8.48623	6.57102	1.33321	4.92873	8.27645e-07	8.92254e-06
Frat1	8.45377	26.3203	3.27567	8.0351	9.35018e-16	2.22546e-14
Gm49694	8.35029	36.1091	4.92052	7.33847	2.16054e-13	4.36024e-12
Ptp4a3	8.21733	18.7388	4.25098	4.40812	1.04274e-05	9.93627e-05
Shb	8.19465	29.6734	4.21655	7.03738	1.95889e-12	3.69566e-11
Cyp26c1	8.06958	30.6099	4.95581	6.17657	6.55073e-10	9.95299e-09
Galnt17	8.0671	24.4575	4.92042	4.97061	6.67409e-07	7.29386e-06
Ccnj	8.06323	22.6204	3.9154	5.7773	7.59085e-09	1.04739e-07
Nhlh1	8.0603	23.5375	4.92063	4.78343	1.72327e-06	1.7818e-05
Gm9260	7.96479	6.11445	0.923459	6.62125	3.56185e-11	6.07882e-10
Fsip1	7.96169	23.7165	4.92055	4.81988	1.43647e-06	1.50084e-05
Gm44647	7.90167	23.1976	4.95838	4.67846	2.89034e-06	2.92024e-05
Dnajb3	7.84085	22.4289	4.89448	4.58249	4.59464e-06	4.55828e-05
Gm43137	7.80427	19.1311	4.59188	4.1663	3.09582e-05	0.000279766
Myb	7.80423	21.9151	4.92265	4.45189	8.51177e-06	8.22408e-05
Ccr6	7.75291	24.6096	4.9204	5.00154	5.68731e-07	6.26706e-06
Gm36756	7.72382	22.7697	4.8147	4.7292	2.2541e-06	2.30817e-05
Gm10451	7.67767	17.6393	3.84499	4.58761	4.48345e-06	4.45075e-05
Fam78a	7.60452	17.5967	4.26632	4.12457	3.71423e-05	0.00033225
1700095J03Rik	7.55329	24.302	3.79241	6.40806	1.47383e-10	2.36809e-09
Armcx2	7.48196	18.7219	3.43032	5.45778	4.82134e-08	6.064e-07
Zfp940	7.38295	15.8816	3.74713	4.23834	2.25182e-05	0.000206305
Pde11a	7.37113	23.9016	4.92054	4.85751	1.18869e-06	1.26172e-05
Oasl1	7.3704	23.7712	4.95754	4.79496	1.62705e-06	1.68778e-05
Krt8-ps	7.35542	4.95569	1.02482	4.83568	1.32691e-06	1.39831e-05
4931414P19Rik	7.28395	21.1541	3.04944	6.93706	4.00335e-12	7.40364e-11
Plppr4	7.28252	35.0601	4.92495	7.11887	1.08815e-12	2.08504e-11
Slc52a3	7.26199	19.1718	4.93253	3.8868	0.000101573	0.000866747
Ddx11	7.23172	22.7089	4.0296	5.63553	1.74523e-08	2.32547e-07
Ldhb-ps	7.22907	4.60116	0.709272	6.48716	8.74689e-11	1.43881e-09
Ang4	7.19989	19.6163	4.93105	3.97812	6.94619e-05	0.000603734
Gm5091	7.19066	23.2444	4.61275	5.03918	4.67536e-07	5.20964e-06
Rps6ka6	6.94582	22.1176	3.29062	6.72141	1.79976e-11	3.15612e-10
Gm4707	6.94498	23.1643	4.92086	4.70738	2.50926e-06	2.55467e-05
Tnfrsf19	6.76552	17.5712	3.0395	5.78096	7.42757e-09	1.02664e-07
Nanos3	6.65019	20.9203	4.95838	4.21919	2.45183e-05	0.0002236
Plb1	6.61537	30.5172	4.9446	6.17182	6.75094e-10	1.02376e-08
2810029C07Rik	6.50851	22.7421	4.92094	4.6215	3.80984e-06	3.80339e-05
Xrcc2	6.48684	20.333	4.92511	4.12843	3.65245e-05	0.000327282
Gm31462	6.41759	23.055	3.92021	5.88105	4.07666e-09	5.80473e-08
Sh3tc2	6.3159	27.5711	4.15708	6.63232	3.30451e-11	5.65174e-10
Engase	6.15368	19.3916	3.54778	5.46583	4.60738e-08	5.81787e-07
Mesp1	6.0928	27.3916	4.92047	5.56687	2.5935e-08	3.37664e-07
Zfp54	6.0369	23.8162	4.92062	4.84008	1.29788e-06	1.36862e-05
1700040D17Rik	5.95155	27.0519	4.92229	5.49578	3.88977e-08	4.96289e-07
Pdia5	5.90867	20.6302	4.92403	4.1897	2.79322e-05	0.000253427
Gm12351	5.90479	21.2063	4.95838	4.27686	1.89549e-05	0.000175476
Zfp275	5.90016	18.3498	4.29312	4.27423	1.91803e-05	0.000177459
Gm42600	5.69792	23.0525	3.4286	6.7236	1.77292e-11	3.11592e-10
Serpini1	5.67562	20.4164	4.92484	4.14559	3.38938e-05	0.000304566
Katnal2	5.65817	23.5475	4.28572	5.49442	3.91994e-08	4.99737e-07
Riox1	5.6104	18.412	3.81256	4.82928	1.37025e-06	1.44017e-05
Gm45200	5.60763	29.1253	4.9205	5.91917	3.23563e-09	4.68373e-08
B230216N24Rik	5.5467	27.5433	4.2507	6.47971	9.18992e-11	1.51012e-09
Gm45074	5.5354	21.6922	4.95838	4.37485	1.21517e-05	0.00011456
Krtap16-1	5.42114	21.8631	4.92185	4.44204	8.91082e-06	8.5836e-05
Gm50268	5.35266	23.7799	4.92059	4.83272	1.34679e-06	1.41831e-05
Gm7502	5.30768	23.7617	4.92056	4.82907	1.37174e-06	1.44078e-05
9130024F11Rik	5.27271	23.5	4.92079	4.77567	1.79114e-06	1.84478e-05
Pfn4	5.27034	22.41	4.92158	4.55341	5.27834e-06	5.1945e-05
Rsad1	5.23232	23.2938	4.92075	4.7338	2.20353e-06	2.25929e-05
Hgfac	5.19033	41.5202	4.92332	8.43337	3.35838e-17	8.91259e-16
Greb1l	5.16742	30.9991	4.94803	6.26495	3.7295e-10	5.77673e-09
Mtag2	5.11827	21.0256	4.92329	4.27064	1.94916e-05	0.000180131
Plcl1	5.10724	17.5587	4.32307	4.06163	4.8732e-05	0.00043085
Omp	5.09159	27.2041	4.93558	5.51182	3.55141e-08	4.55674e-07
Rubcnl	5.06207	20.8002	4.92626	4.22231	2.41816e-05	0.000220782
Capn6	5.04725	35.1764	4.95838	7.09434	1.2997e-12	2.47845e-11
Xrra1	4.97212	23.6754	4.92062	4.81147	1.49822e-06	1.56025e-05
Calca	4.93766	24.5767	4.92056	4.9947	5.89282e-07	6.48455e-06
A730090N16Rik	4.92702	21.6728	3.99892	5.41965	5.97165e-08	7.40297e-07
Pard3b	4.86221	21.6394	4.92375	4.39489	1.10828e-05	0.00010523
Tln2	4.84995	29.1656	4.95343	5.88796	3.90983e-09	5.58853e-08
Gm13339	4.83751	3.73521	0.676326	5.5228	3.33648e-08	4.30525e-07
Gm36028	4.82764	20.6812	3.49372	5.91954	3.22842e-09	4.67754e-08
Napepld	4.7871	23.8228	4.92061	4.84142	1.28913e-06	1.3603e-05
Crtam	4.77441	23.5146	4.9209	4.77851	1.76597e-06	1.82004e-05
Serpinb8	4.76535	21.4506	4.93658	4.34525	1.3912e-05	0.00013023
Fer1l6	4.68807	21.6663	4.31491	5.02127	5.13305e-07	5.68779e-06
Pnmt	4.68733	21.4559	4.78912	4.48013	7.45973e-06	7.22953e-05
Tango6	4.6147	15.9528	3.50362	4.55324	5.28263e-06	5.19551e-05
Cfap58	4.58768	23.9425	4.44926	5.38124	7.39763e-08	9.04704e-07
Map10	4.54974	17.5042	3.99545	4.38104	1.18116e-05	0.000111552
Gpx8	4.49421	23.6271	4.95838	4.76508	1.88782e-06	1.9431e-05
Marchf4	4.40698	22.4355	4.92166	4.55852	5.15141e-06	5.07901e-05
Entpd3	4.39608	23.1111	4.44695	5.19706	2.0246e-07	2.36174e-06
Nr5a1	4.36885	19.3219	4.92992	3.9193	8.8805e-05	0.000762286
Mfsd6l	4.30461	23.317	4.92073	4.73853	2.15271e-06	2.21003e-05
Eef1aknmt	4.27874	19.8965	4.26878	4.66092	3.14795e-06	3.17045e-05
Ptprd	4.10819	17.1537	4.39826	3.90012	9.61469e-05	0.000822206
Clic3	4.10145	25.6083	4.93658	5.18746	2.1318e-07	2.47376e-06
Nefh	4.10053	23.3035	4.52008	5.15555	2.52887e-07	2.90319e-06
Gm13245	4.06971	24.5356	4.66595	5.25844	1.45281e-07	1.7161e-06
Gm21321	4.05561	23.8934	4.95776	4.81941	1.43986e-06	1.5034e-05
Armcx6	4.03554	19.3801	4.69061	4.13168	3.60124e-05	0.000323239
Aknad1	4.00992	32.8607	4.95126	6.63684	3.20484e-11	5.48717e-10
Lrrc7	3.97599	38.8342	4.93828	7.86391	3.72331e-15	8.59222e-14
Creb3l3	3.87987	22.1541	4.92197	4.50108	6.76105e-06	6.57242e-05
Cdc25a	3.87932	22.6036	4.92185	4.59251	4.37944e-06	4.35564e-05
Zdbf2	3.86785	19.3789	4.23694	4.5738	4.78953e-06	4.74276e-05
Chia1	3.82124	23.8633	4.9207	4.84957	1.23727e-06	1.30904e-05
Ifi203	3.78381	19.1105	4.93776	3.87027	0.000108713	0.000925689
Tlr2	3.70865	19.8191	4.95838	3.9971	6.41236e-05	0.000561319
Kcnn1	3.69186	23.8717	4.92072	4.85125	1.22685e-06	1.29888e-05
Gm49309	3.68589	19.3951	4.93628	3.9291	8.52658e-05	0.000733092
Gad2	3.67925	23.1266	4.92964	4.69134	2.71421e-06	2.75276e-05
Gm43753	3.57957	20.6535	4.92394	4.1945	2.73471e-05	0.000248544
Gm5148	3.56385	47.1113	4.92268	9.57024	1.06659e-21	3.72441e-20
Gm7067	3.54652	26.4334	4.92075	5.37184	7.79382e-08	9.51694e-07
Dnah7a	3.51366	23.7469	4.46354	5.32019	1.03659e-07	1.2429e-06
Nek2	3.48586	23.7407	4.92076	4.82459	1.40289e-06	1.47156e-05
Shisa9	3.48171	27.0544	4.92076	5.49801	3.84091e-08	4.90841e-07
Rps2-ps13	3.47737	3.89189	0.875138	4.44717	8.701e-06	8.39673e-05
C3ar1	3.46419	23.5613	4.9208	4.78811	1.68359e-06	1.74417e-05
Mxra7	3.37491	23.4366	3.77081	6.21528	5.12318e-10	7.859e-09
Kcnmb2	3.37398	22.8147	4.921	4.63618	3.54907e-06	3.55868e-05
Gm5481	3.36506	20.1833	4.92431	4.0987	4.15478e-05	0.000369796
Bdh1	3.35525	28.5911	4.95838	5.76621	8.1072e-09	1.11381e-07
Smim24	3.35512	26.5895	4.95581	5.36532	8.08036e-08	9.85038e-07
Gm5837	3.23735	5.14638	1.13851	4.52027	6.17596e-06	6.03682e-05
Kctd11	3.2146	20.0837	4.92747	4.07586	4.58448e-05	0.000406905
Myo7b	3.20472	20.5881	4.92462	4.18065	2.90675e-05	0.000263277
Wdr63	3.19697	20.3009	4.4115	4.6018	4.18855e-06	4.1684e-05
4933423P22Rik	3.18599	18.7538	3.61545	5.18712	2.13569e-07	2.475e-06
Gm10182	3.11109	4.44941	1.04954	4.2394	2.24117e-05	0.000205566
Gm27653	3.06745	19.3188	4.00781	4.82029	1.43347e-06	1.4987e-05
Gm45734	3.0003	3.54954	0.8895	3.99049	6.59363e-05	0.000575921
Gm14029	2.96596	27.6493	4.92088	5.61878	1.92312e-08	2.54757e-07
Gm49979	2.94058	23.5431	4.92089	4.78433	1.71561e-06	1.77502e-05
Emp2	2.93655	29.0037	4.93181	5.88094	4.07931e-09	5.80473e-08
Gm13404	2.90419	23.1146	4.92121	4.69695	2.64081e-06	2.68003e-05
Scnn1g	2.88906	24.7796	4.93777	5.01838	5.21082e-07	5.76995e-06
Gm25360	2.87905	25.0922	4.95776	5.06119	4.16639e-07	4.66209e-06
S100a2	2.68258	28.7317	4.93406	5.82313	5.7755e-09	8.09536e-08
Zfp14	2.64878	23.3132	4.08998	5.70008	1.19751e-08	1.61319e-07
Gm42447	2.61576	19.8548	3.70065	5.36521	8.08544e-08	9.85038e-07
Map3k21	2.52821	23.1692	4.15908	5.57075	2.53651e-08	3.30785e-07
2310026L22Rik	2.47812	31.7108	4.92109	6.44386	1.16475e-10	1.89054e-09
Sbk2	2.43034	27.7577	4.92105	5.6406	1.69457e-08	2.26175e-07
Ribc2	2.38786	24.5155	4.95838	4.94426	7.64329e-07	8.29612e-06
Gm21798	2.35659	4.41534	1.05999	4.16547	3.1071e-05	0.000280467
Gm49658	2.34555	22.9895	4.60995	4.98693	6.13465e-07	6.72742e-06
Il2ra	2.32379	26.9208	4.9211	5.4705	4.4878e-08	5.68038e-07
Ifi203-ps	2.26439	24.5843	4.94961	4.96691	6.80284e-07	7.4263e-06
Zfp786	2.20098	25.6327	4.92116	5.20867	1.902e-07	2.22687e-06
Efemp1	2.16615	23.3114	4.92119	4.73694	2.16966e-06	2.226e-05
Erich6	2.15907	20.2759	4.92501	4.11693	3.83956e-05	0.000342698
Ubap1l	2.14759	35.2478	4.92157	7.16189	7.95709e-13	1.5415e-11
Gm37176	2.10445	28.3945	4.92121	5.76982	7.9357e-09	1.09308e-07
4430402I18Rik	2.08706	22.8671	4.92123	4.64663	3.37399e-06	3.38953e-05
Sppl2c	2.06549	23.0467	4.92123	4.68312	2.82539e-06	2.85642e-05
Fank1	1.98305	28.9271	4.92128	5.87798	4.15311e-09	5.90447e-08
Map3k5	1.9612	19.763	4.28995	4.60681	4.0889e-06	4.07431e-05
Prr5	1.92953	32.8513	4.92133	6.67529	2.46744e-11	4.25206e-10
Gspt2	1.75768	31.7942	4.92144	6.46034	1.04466e-10	1.70606e-09
Gm266	1.74898	30.6102	4.93764	6.19936	5.66921e-10	8.67155e-09
Cnnm1	1.6312	22.6781	4.92154	4.60792	4.0672e-06	4.05523e-05
Gm10044	1.59027	25.2819	4.92157	5.13695	2.79236e-07	3.18273e-06
Gm43950	1.58963	25.2774	4.92157	5.13604	2.80593e-07	3.19591e-06
Gm3830	1.5754	22.7891	4.9216	4.63042	3.6492e-06	3.65218e-05
Ephb6	1.56355	25.2693	4.9216	5.13437	2.83097e-07	3.22212e-06
Gm11934	1.42474	29.364	4.92177	5.96615	2.42924e-09	3.54219e-08
Necab1	1.30975	22.1522	4.92195	4.50071	6.77281e-06	6.57983e-05
Gm35025	1.2345	33.6163	4.92211	6.82966	8.51164e-12	1.54012e-10
Gm30735	1.05278	21.6641	4.92253	4.401	1.07755e-05	0.000102496

## Sheet: overlap with OHC gene
The entire list of 729 genes that both were higher expressed in OHC-like cells than in P60_WT SCs, and were overlapped with P30_WT OHCs-enriched genes
Figure 6-figure supplement 2A
Gene names
Ocm
Calm1
Cib2
Selenow
Lhfpl5
Calb2
Plbd1
Tspan13
Krt7
Ppp1r27
Reep5
Calml4
Ppp1r17
Triobp
Kcna10
Espn
Pls1
Pkig
Slc26a5
Lrrc10b
Chrna9
Myo7a
Lmo7
Pvalb
Gm28437
Ikzf2
Smpx
Dmpk
Tmc1
Mkrn2os
Gm5737
Aplp1
Strip2
Calb1
Ush2a
Heyl
Gm6558
Pxdc1
Ap3b2
Grxcr2
Ablim2
Atp2b2
Syne4
Loxhd1
Dner
Grp
Mreg
Cdc25b
Chst2
Six4
Sh3glb2
AI593442
Nrsn1
Sh3gl3
Kif5c
Cacna1d
Eya2
Srpk1
Endod1
Rab3b
Kncn
Strc
Pcp4
Osbpl1a
Card19
Pou4f3
Lrtm2
Miat
Rassf4
Map1b
Dusp14
Megf6
Snap91
Fcrlb
Epha5
Gm1673
Atp8a1
Ckmt1
Chrna10
Cotl1
Jag2
Tmem255b
Ppp2r1b
Snap25
Zmiz1
Srd5a1
Barhl1
Dytn
Timp2
Gm29216
Gm28661
Rundc3a
Gldn
Elmod1
Anxa6
Slc39a2
Madd
Spock2
Gm32742
Pla2g7
Tnc
Ldha
Fgf21
Lama5
Lhx3
Cd83
Actr3b
Olfml3
Ccdc88c
Runx1t1
Neurl1a
Smim18
Nrxn3
Map2
Hsd17b14
Ccer2
Fabp5
Olah
Acvr1c
Pjvk
Impdh1
Gfi1
Nav2
Bex2
Casc4
Plce1
Coro2a
Fscn2
Fam20c
Gse1
Inka2
Adamtsl1
Plekhg5
Cdc42se2
Defb25
Gm44401
Flrt1
Ptpru
Tmie
Grxcr1
Rgs11
Laptm5
Rgs12
Fez1
Xirp2
Mob3b
Slc1a5
Umodl1
Ctsc
Klhdc7b
Gpr156
Fcho1
Ptprq
Rncr4
Fgf9
Lasp1
Mgat5b
Eif2s3y
Bcr
Angpt1
Osbpl3
Ppp1r1a
Erich3
Ccdc74a
Smoc2
Ankfn1
Gas6
Pdzd7
Ica1l
Disp2
Slc18a1
Wnt4
Sting1
Slc22a23
Arxes2
Gipc3
Rnf150
Nop2
Btbd11
D930020B18Rik
Necab2
Fam57b
Actn3
Gata2
Nebl
Kcnh2
Lctl
Zcchc12
Tmem191c
Plin5
Misp3
Gm17322
Galnt13
Plekhb2
Slc6a11
Srrm4
Chgb
Mapk12
Ak1
Aldh18a1
Ncald
Mical2
Pdgfra
Rims2
Sh2d4b
Zfp618
Galnt14
Plscr5
Gm4825
Elf3
Chrna1
Sh3pxd2a
H2ac6
Gtf3c4
Sult4a1
Gdap1
Pdzrn3
Eid2
Tcerg1l
Adm
Ddx3y
Elovl2
Sema3a
Ly6g6c
Gnao1
Sybu
Shroom2
Mboat2
Fbxl16
Bend4
Robo2
Lrrc30
Sh3bp4
Wasf1
Mdga1
Nrp2
Mapk10
Bmp3
Plekho1
Art5
Gm6277
Fam217b
Gabrb3
Hint1
Rgl1
Crmp1
Myo3a
A930009A15Rik
Hs3st3b1
E230025N22Rik
Syt7
St8sia3
Tunar
Ucp3
Odf3b
Tnfaip3
Tle2
Hecw1
Cox8b
Mgll
Cyth1
Enc1
Rara
Bsn
Inka1
Asic1
Ssbp2
Pdzph1
Fads6
Oacyl
Unc5b
Rims3
Gm4131
Amph
Gpc1
Pcdh7
Smim1
Grm2
Adarb1
Shisal1
Tmprss11b
Tspan2
Capn15
Slc4a8
Tmem25
Brsk2
Lingo3
Slco5a1
Pcbp3
Ankrd13b
Rragb
St6galnac6
Art1
Cdh13
Ppfia3
Erc2
Insc
Dach1
Gm45104
Tinagl1
Irf1
Klf2
Dtx1
Mcph1
Efcc1
Cacng5
Lmod1
Gm30094
Uty
Gm1043
Ankrd50
Hemk1
Gdap1l1
Dscaml1
Rab36
Arhgap24
Asphd2
AA986860
Lpcat2
Syt14
Tnfaip8l1
Gm44164
Cel
Slx4
Dpysl5
Gm9195
Scn8a
Hsd11b1
Rnf208
Plk1
Ttc28
Cmip
Hrob
Aff3
Rps6kl1
Naaa
Cacnb2
Ube2ql1
Spx
Fads2
Slc16a7
Ripor3
Slc25a13
Nt5dc3
Myof
Tshz2
Gm28439
Maneal
Syt2
Unc79
Phf21b
Akap1
Magee1
Pcsk6
Gm13889
Nme9
Btn2a2
Mvb12b
Nectin1
Tafa3
Gm11655
Spag6l
Slain1
Wdr78
Tab3
Lpcat4
Unc80
Aqp5
St8sia5
Mael
Gm44677
Cdh2
Slc7a4
Lrrc8c
Pld5
Fbxl22
Brd3os
Ssh2
Igsf3
Phtf1os
Meig1
Orai2
4732496C06Rik
Fbxo31
Slc36a1
Sh2b2
Prickle3
Ptgfrn
Elovl4
Acvr1
Vkorc1l1
Mfsd4a
Fbxw10
Lrrn3
Cap2
Abhd14a
Gfod1
Slc43a2
Lrguk
Mturn
Als2cl
Nphp4
Samd14
Syp
Zfp11
Rtn4rl2
Plaat1
Syngr1
Fhod3
Nudc-ps1
Slc1a4
Dkk3
4933424M12Rik
Plcxd2
Slc9a1
Gm10432
Racgap1
Lrrc73
Fam43a
Gm37479
Iqgap2
Gpr19
Ltbp1
Ehd4
F8
Ppp1r32
Gm14207
Ccdc9b
Ccdc40
Cabyr
Lrrc3c
Dll4
Rtl6
Filip1l
Hdgfl3
Stx2
Cers1
Vinac1
Fign
Ccdc149
Mindy4b-ps
Kdm5d
Gm34220
Scx
Clip3
Gm37925
Man1a
Hey2
Ttyh2
Mks1
Ksr2
Zfp629
Qsox1
Brpf3
Gm44509
Mroh7
Ssbp4
Btc
Stx1a
Ppp1r14c
Marchf3
Erbb2
Fam13a
Ogdhl
Gm44829
Rnf227
Nova1
Skor1
Zfp827
Negr1
Mars2
Loxl1
Myo5a
Rnf165
Gm18072
Atp2c2
Sh3rf3
Ano3
Gm49937
Ncam1
Map3k14
Casp3
Gm45495
Arnt2
Fn3k
Myo19
Adam23
Tcea1-ps1
Taf1c
Suv39h2
Gm44210
Tpcn2
Cmya5
Whrn
Ephb3
Zfp503
Gucy2c
Gm34583
Gm13986
Slc9a3r2
Sec16b
Ccdc65
Tshz3
Gm49066
Chek1
Mmp2
Ppargc1b
Fam124a
Cdcp2
Carmil3
Rimbp2
Spef1
Khdrbs2
Dph2
Ddx25
Pcsk9
Lrmda
Kif18a
Bend3
Adcy8
Gm42448
Trerf1
Slc16a3
Gm24620
Ttc12
1700066M21Rik
Jade3
Lhfpl4
Lrrc75a
2900027M19Rik
Gm44691
Fam185a
Slc27a3
Sema4c
Stmn3
D430040D24Rik
Nfasc
Ttc30a1
Sycp2
Ube2cbp
Abca6
Prph2
B4galnt4
Tsku
Calcrl
Dus4l
Dynlrb2
Ghsr
9030407P20Rik
Nat14
Impg1
Fgd1
Nrxn2
Pde4d
Gm26953
Krt222
Cdh4
A430010J10Rik
Hrh3
A230051N06Rik
Bmp7
Nkain2
Gm37064
Ap5b1
Gm35585
6430571L13Rik
Tmem178b
Gm15751
Dlgap3
Mrap2
Sprtn
Timp3
Vgf
Gm4864
Mms22l
A930017M01Rik
Camk2n2
Hes5
Gm37060
Ankrd45
A530072M11Rik
Rhebl1
Dhrs13
Zfp647
Shisa4
B230206I08Rik
Samd11
Rln3
Krt87
Zc3h12b
Sik1
Efr3b
Pomc
2900052L18Rik
Gm43728
1700056N10Rik
Mettl5os
Gm30373
Gm10558
Fam131a
Gm27239
Them7
Gpr62
Gm49215
Star
Ctnna2
Bambi
Lrg1
Fam161a
Soga3
Fgd2
Dhcr24
Gm12751
H3f3a-ps1
Acot6
Ina
1110006O24Rik
Gpr162
Dnah7b
Gm49322
Rnf17
Adgra2
4930473A02Rik
AI480526
4930448D08Rik
Frs3
Spef2
Slc19a2
Rtn4r
Cys1
Gm17108
Tnfrsf13c
Gm13868
Spata33
9230112E08Rik
St6galnac2
Dgki
Gm19427
Zfp251
Gm45453
Cox5b-ps
1700056E22Rik
Gm31105
Dnase1l2
Ccnb2-ps
Pgap3
Nnat
Gm10244
Serpinf1
Tmem28
4930466K18Rik
Pm20d2
Gtf2h4
Zmat4
Cfap299
Gprin1
Nefl
Padi1
Gm13269
E430021H15Rik
Gm42640
B230307C23Rik
Adamts17
Noxred1
Septin1
Mroh3
Gm10461
Grb10
Chd5
Meis1
Cacna1e
Zfp324
Gm43266
Gm13525
Gm48766
Zkscan2
Npas3
Gm42636
Gm37959
Kcnq1
4833412C15Rik
Gm5173
Zfp518b
Eno2
Dbf4
Ifi30
Tmem81
Reep1
Frat1
Gm49694
Ptp4a3
Cyp26c1
Ccnj
Gm43137
Myb
Fam78a
Armcx2
4931414P19Rik
Plppr4
Ddx11
Rps6ka6
Nanos3
Plb1
Xrcc2
Gm31462
Engase
Gm45074
Gm50268
Hgfac
Greb1l
Plcl1
Capn6
A730090N16Rik
Gm13339
Crtam
Pnmt
Tango6
Entpd3
Aknad1
Lrrc7
Gad2
Gm5148
Bdh1
Wdr63
Gm45734
Gm21798
Zfp786
Prr5
Gm35025

## Sheet: Adult SC over OHC-like cells
genes	baseMean	log2FoldChange	lfcSE	stat	pvalue	padj			The entire list of genes that were higher expressed in P60_WT SCs
Skp1a	75060.9	-2.6555	0.344372	-7.71114	1.24702e-14	2.76935e-13			than in OHC-like cells
Clu	45517.1	-5.90496	1.2258	-4.81721	1.45578e-06	1.51804e-05
S100a1	45377.4	-2.07512	0.387465	-5.35562	8.52645e-08	1.0356e-06
Dbi	18665.4	-3.40124	0.586223	-5.80195	6.55477e-09	9.13254e-08
Fabp3	18101.9	-8.61659	1.42101	-6.0637	1.33023e-09	1.97035e-08
Odf3l2	12688.9	-4.38071	0.888033	-4.93305	8.09574e-07	8.73363e-06
Mdm1	12303.2	-5.33279	1.20744	-4.41659	1.00269e-05	9.5833e-05
Prdx6	8223.38	-3.22119	0.699596	-4.60436	4.13735e-06	4.12001e-05
Plekhb1	8011.77	-3.04874	0.56562	-5.39007	7.04286e-08	8.63971e-07
Jun	5958.7	-3.55956	0.875216	-4.06706	4.76094e-05	0.000421392
Actn4	5938.34	-2.45581	0.506206	-4.85139	1.22596e-06	1.2988e-05
Sorbs2	5764.94	-2.248	0.378116	-5.94527	2.76002e-09	4.00618e-08
Far1	5722.32	-3.37202	0.743308	-4.5365	5.71959e-06	5.60794e-05
Prxl2a	5085.13	-2.37674	0.484503	-4.90552	9.31801e-07	9.96445e-06
Septin7	4418.35	-3.44436	0.834342	-4.12824	3.65553e-05	0.000327373
9530077C05Rik	4371.89	-6.3659	0.970825	-6.55721	5.48242e-11	9.25733e-10
Gng5	4158.43	-3.41472	0.442804	-7.71158	1.24265e-14	2.76351e-13
Gas2	4155.28	-4.9356	1.14461	-4.31202	1.61767e-05	0.000150633
Gjb6	4109.42	-14.4385	1.20672	-11.9651	5.41269e-33	3.35355e-31
Cnn3	4072.4	-2.87323	0.608187	-4.72426	2.3096e-06	2.36044e-05
Sypl	3999.44	-4.00721	0.976519	-4.10357	4.0682e-05	0.000362496
Tspan8	3984.61	-2.75672	0.690922	-3.98991	6.60974e-05	0.000577012
Rflnb	3751.05	-4.29695	0.947936	-4.53296	5.81637e-06	5.69933e-05
Zfp36	3566.92	-2.9581	0.754367	-3.92131	8.80697e-05	0.000756383
Hebp2	3559.71	-2.17694	0.494138	-4.40553	1.05524e-05	0.000100494
Paics	3532.91	-2.26579	0.383864	-5.90257	3.57873e-09	5.1337e-08
Lcp1	3283.5	-6.76507	1.1859	-5.70459	1.16621e-08	1.57369e-07
Elovl1	3276.68	-6.65215	1.57768	-4.2164	2.48228e-05	0.000226244
Map2k1	3233.25	-3.80871	0.693928	-5.48862	4.05085e-08	5.15601e-07
Slc44a2	2965.08	-4.41524	0.770044	-5.73375	9.82336e-09	1.33462e-07
Rnd2	2703.31	-5.54454	1.09545	-5.06141	4.16167e-07	4.66007e-06
Pgrmc1	2692.47	-2.57766	0.604683	-4.26283	2.01856e-05	0.000186112
Scamp1	2624.89	-3.64766	0.920316	-3.96348	7.38648e-05	0.000640114
Jup	2616.91	-2.98965	0.577012	-5.18127	2.20381e-07	2.54654e-06
Rorb	2385.27	-4.00103	0.576363	-6.94185	3.87007e-12	7.16549e-11
Acsl1	2333.23	-2.44898	0.634691	-3.85854	0.000114065	0.000967638
Sptbn1	2248.01	-2.34106	0.563308	-4.15592	3.23988e-05	0.000291791
Cav2	2215.79	-11.3588	1.62297	-6.99877	2.5821e-12	4.83704e-11
Glul	2134.36	-7.82336	1.59449	-4.90649	9.27225e-07	9.92885e-06
Liph	2016.58	-8.02524	1.39929	-5.73524	9.73722e-09	1.32518e-07
Pakap	2010.09	-3.87306	0.931986	-4.15571	3.24281e-05	0.00029189
Enah	1942.55	-2.63339	0.462816	-5.68993	1.27093e-08	1.70776e-07
Mgst1	1917.72	-8.42256	1.6395	-5.13726	2.7877e-07	3.17969e-06
Mal	1723.24	-7.56835	1.56885	-4.82412	1.4062e-06	1.47308e-05
Socs6	1618.51	-4.28402	1.10744	-3.86839	0.000109557	0.000931259
Tmem79	1618.04	-6.35171	1.38826	-4.57529	4.75551e-06	4.71201e-05
Fam107a	1612.68	-7.24985	1.4952	-4.84875	1.24241e-06	1.3136e-05
Sall1	1547.95	-2.7633	0.607728	-4.54694	5.44311e-06	5.34674e-05
Npc1	1506.37	-4.92974	0.88578	-5.56542	2.61517e-08	3.40208e-07
Gjb2	1479.67	-12.0468	1.42422	-8.45848	2.70881e-17	7.21278e-16
Tuba1b	1462.62	-2.42231	0.614632	-3.94107	8.11202e-05	0.000700096
Adipor2	1401.18	-2.61582	0.560083	-4.67041	3.00592e-06	3.03316e-05
Egfl6	1381.46	-6.76856	1.60572	-4.21527	2.49481e-05	0.000227129
Aif1l	1356.85	-7.10345	1.60614	-4.42269	9.74814e-06	9.35058e-05
Rnf180	1353.94	-3.82832	0.933169	-4.10249	4.0873e-05	0.000363993
Sod1	1346.11	-2.03909	0.384065	-5.30923	1.1009e-07	1.31604e-06
Kank1	1246.78	-3.83919	0.947955	-4.04997	5.12235e-05	0.000451874
Smox	1244.49	-4.29604	1.11029	-3.86928	0.000109156	0.000928961
Kif2a	1234.32	-3.02242	0.742609	-4.07	4.70122e-05	0.00041657
Serpine2	1068.24	-13.5952	1.92013	-7.08033	1.43807e-12	2.73578e-11
Cav1	1050.15	-10.704	1.27357	-8.40471	4.28921e-17	1.12701e-15
Tm4sf1	1030.85	-11.3944	1.59076	-7.16284	7.90254e-13	1.53454e-11
Gm34653	979.487	-7.74693	1.95361	-3.96543	7.32622e-05	0.000635378
Zp1	969.283	-15.0137	1.85017	-8.11477	4.86717e-16	1.19231e-14
Atp1b3	908.165	-3.21523	0.792174	-4.05874	4.93383e-05	0.000435968
Fxyd6	858.35	-13.7837	1.44544	-9.53596	1.4851e-21	5.1407e-20
Fbln5	830.347	-9.30088	2.00737	-4.63336	3.59776e-06	3.60523e-05
Zyx	818.46	-5.02932	1.25863	-3.99587	6.44579e-05	0.000563936
BC016579	799.429	-7.31109	1.60161	-4.56483	4.9989e-06	4.94087e-05
Tmem221	772.685	-12.6886	1.42498	-8.9044	5.36764e-19	1.57692e-17
Rbp7	753.697	-11.518	2.04736	-5.6258	1.84648e-08	2.45832e-07
Fblim1	746.059	-6.10472	1.33928	-4.5582	5.15951e-06	5.08384e-05
Kcnj10	723.38	-30.8404	2.11714	-14.567	4.55483e-48	4.80308e-46
Acss3	703.27	-4.59502	1.05091	-4.37241	1.2288e-05	0.000115776
Il17re	667.18	-13.5445	1.89825	-7.13526	9.66038e-13	1.86e-11
1600022D10Rik	659.106	-26.9796	2.10334	-12.827	1.15702e-37	8.81497e-36
Zfp36l1	586.304	-5.5006	1.38015	-3.9855	6.73388e-05	0.000586241
Fibin	585.304	-13.7592	1.16259	-11.835	2.57415e-32	1.53514e-30
Gm16136	574.801	-6.49274	1.52497	-4.25761	2.06621e-05	0.000190175
Rasgrp1	538.262	-8.81329	1.67245	-5.26968	1.36664e-07	1.62032e-06
Map4	531.774	-8.7053	1.76318	-4.93728	7.92205e-07	8.55786e-06
Pls3	526.001	-5.88056	1.47568	-3.98498	6.74856e-05	0.000587198
Zfp185	507.985	-9.29655	1.53143	-6.0705	1.27513e-09	1.89403e-08
Erbin	473.558	-3.17083	0.770339	-4.11614	3.85268e-05	0.000343676
St3gal6	471.021	-5.24314	1.35519	-3.86894	0.000109312	0.00092979
Drc1	455.629	-15.2243	1.94058	-7.84525	4.32099e-15	9.87131e-14
Pinlyp	445.672	-30.7015	2.79183	-10.9969	3.95396e-28	1.87378e-26
Creb3l4	444.19	-8.29689	1.63167	-5.0849	3.67816e-07	4.14489e-06
Fus	443.853	-2.59324	0.650053	-3.98928	6.62748e-05	0.000578243
Stx11	413.456	-7.52982	1.48687	-5.06422	4.10071e-07	4.59828e-06
Rhoj	402.541	-12.1701	1.97778	-6.15343	7.58271e-10	1.1412e-08
Ntn4	388.95	-11.0416	1.6708	-6.60856	3.88083e-11	6.61231e-10
Dennd2d	382.243	-7.47488	1.58132	-4.727	2.27863e-06	2.33029e-05
Slc45a3	371.015	-11.7999	1.35446	-8.71182	2.99025e-18	8.47219e-17
Fam174b	346.017	-9.54255	1.98667	-4.80329	1.56079e-06	1.62222e-05
Gstm1	342.26	-11.7808	2.17985	-5.40443	6.50166e-08	8.02527e-07
Palm	341.447	-7.03025	1.55835	-4.51134	6.44184e-06	6.27361e-05
Dclk3	335.904	-35.4754	1.76227	-20.1305	3.98786e-90	2.04834e-87
Ppp2r2b	329.955	-12.1051	1.99716	-6.06119	1.35118e-09	1.99794e-08
Tectb	324.242	-29.9069	2.73925	-10.9179	9.46338e-28	4.39316e-26
Sox10	302.314	-9.91361	1.79327	-5.52823	3.23481e-08	4.18083e-07
Hlf	300.461	-7.95035	2.00484	-3.96557	7.322e-05	0.000635358
F12	289.228	-28.8068	1.7079	-16.8667	7.90373e-64	1.59305e-61
Lpar3	265.504	-6.63189	1.59298	-4.1632	3.13815e-05	0.000282949
Mmp14	254.309	-7.40209	1.86867	-3.96116	7.45872e-05	0.000645814
Aox2	253.634	-10.7179	1.63124	-6.57044	5.01682e-11	8.49817e-10
Mrtfb	251.594	-4.5288	1.05828	-4.2794	1.87397e-05	0.000173686
Extl1	248.78	-8.76519	1.27634	-6.86743	6.53708e-12	1.19232e-10
Fut2	246.715	-7.21392	1.76339	-4.09093	4.29644e-05	0.000382192
Tmprss2	245.654	-13.3417	1.71488	-7.77998	7.25373e-15	1.63599e-13
B4galnt1	242.031	-5.63522	1.43483	-3.92745	8.58514e-05	0.000737729
Gm19345	240.74	-6.87279	1.38943	-4.94647	7.55713e-07	8.2082e-06
Nupr1	238.322	-9.84208	1.98155	-4.96686	6.8046e-07	7.4263e-06
Nrxn1	236.379	-8.9747	2.29258	-3.91467	9.05289e-05	0.000776666
Rusc2	233.812	-5.52775	1.35313	-4.08515	4.40492e-05	0.000391186
Pole	233.687	-8.28282	1.84465	-4.49019	7.11605e-06	6.90066e-05
Vstm4	231.974	-14.1714	2.68765	-5.27277	1.34377e-07	1.59558e-06
Dhrs3	231.868	-14.029	2.15425	-6.51225	7.40313e-11	1.22664e-09
Bcl6	223.781	-9.02828	1.69704	-5.32	1.03766e-07	1.24324e-06
Tnnt1	220.954	-12.8829	1.72247	-7.47931	7.47156e-14	1.56333e-12
Aebp1	204.517	-28.8922	2.48846	-11.6105	3.64584e-31	2.04411e-29
Gm8730	202.937	-4.58796	0.788855	-5.81597	6.0283e-09	8.42005e-08
Ankrd33b	201.939	-41.1847	3.37247	-12.212	2.68155e-34	1.76439e-32
Tulp3	199.669	-5.10826	1.2979	-3.9358	8.29205e-05	0.000714472
Kazald1	195.815	-27.8175	1.75464	-15.8537	1.32541e-56	1.9013e-54
Rnf213	189.773	-11.2388	2.37545	-4.73124	2.23157e-06	2.28657e-05
Pdgfd	185.985	-9.68284	2.42376	-3.99497	6.4703e-05	0.000565769
Gm43259	179.517	-24.762	2.57551	-9.6144	6.95157e-22	2.44349e-20
Rcan2	178.644	-13.7439	2.50526	-5.486	4.1113e-08	5.22877e-07
Spns2	174.272	-29.493	2.74634	-10.739	6.67529e-27	2.98569e-25
Frk	168.319	-24.2604	2.99285	-8.10611	5.2267e-16	1.2745e-14
Scube2	168.125	-11.9581	1.56755	-7.62853	2.37448e-14	5.16514e-13
Kif1c	161.108	-9.11342	1.2856	-7.08886	1.3522e-12	2.57549e-11
Trim29	157.816	-7.98665	1.88293	-4.24161	2.21927e-05	0.000203674
Pecam1	157.168	-10.3415	2.56045	-4.03894	5.36931e-05	0.000472008
Arhgef6	152.121	-10.6658	1.93374	-5.51565	3.4749e-08	4.46576e-07
Lpar1	150.544	-11.3637	2.44565	-4.6465	3.37614e-06	3.38956e-05
Pgm5	140.684	-5.85879	1.45295	-4.03234	5.52243e-05	0.000485017
Palm3	133.79	-14.9073	3.48197	-4.28128	1.85824e-05	0.000172328
Rad9a	133.175	-25.7351	2.92745	-8.79098	1.48265e-18	4.26141e-17
Lrrc1	132.333	-7.9757	1.90031	-4.19706	2.704e-05	0.000245893
Fndc4	131.089	-11.3989	2.65486	-4.29361	1.7579e-05	0.000163308
Enpp3	129.337	-29.4302	2.38223	-12.354	4.63198e-35	3.19286e-33
Myorg	126.409	-27.0119	2.63391	-10.2554	1.11858e-24	4.60236e-23
Trim56	126.045	-8.47239	1.96974	-4.30128	1.69818e-05	0.000157852
Trim17	125.438	-29.5772	3.60114	-8.21328	2.15225e-16	5.41393e-15
Gm43018	123.599	-27.2876	2.36496	-11.5383	8.45975e-31	4.67725e-29
Osbpl6	120.94	-10.5483	2.25762	-4.67231	2.97825e-06	3.00715e-05
Ackr3	120.825	-11.6637	2.58081	-4.5194	6.20143e-06	6.058e-05
Cdc45	119.595	-27.4529	3.39019	-8.09774	5.599e-16	1.36319e-14
Gm42993	115.608	-12.1856	2.74131	-4.44518	8.78184e-06	8.46449e-05
B130021K23Rik	115.375	-7.77423	1.9615	-3.9634	7.38887e-05	0.000640114
Gm44676	114.301	-31.7481	2.80597	-11.3145	1.11223e-29	5.76875e-28
Tmem139	109.571	-27.704	3.23205	-8.57164	1.0202e-17	2.76268e-16
Tcf7l1	107.651	-11.0965	2.13914	-5.18735	2.13306e-07	2.47376e-06
0610033M10Rik	107.072	-29.6745	1.73091	-17.1439	6.98047e-66	1.4625e-63
Tgfb2	105.044	-26.5185	2.49787	-10.6164	2.49917e-26	1.08727e-24
Cpne2	104.735	-11.8039	1.8095	-6.52331	6.87722e-11	1.14666e-09
Nkd2	103.058	-23.9351	2.97223	-8.05292	8.0844e-16	1.93867e-14
Mypn	99.9238	-40.7238	2.33739	-17.4228	5.54102e-68	1.27869e-65
Psapl1	97.8595	-27.3875	3.82695	-7.15648	8.27779e-13	1.60155e-11
Jph1	97.6402	-25.2001	3.25288	-7.74701	9.40797e-15	2.10398e-13
Camk1d	97.2824	-6.68717	1.56073	-4.28464	1.83034e-05	0.000169839
2610528J11Rik	96.7894	-10.0167	2.09501	-4.78119	1.74264e-06	1.80065e-05
H2-Q10	96.3672	-28.193	3.18891	-8.84097	9.4895e-19	2.76742e-17
Echdc3	95.3602	-27.2955	2.76712	-9.86425	5.94761e-23	2.1973e-21
Zc2hc1c	92.9934	-23.0425	3.81029	-6.04745	1.47161e-09	2.16766e-08
Egfros	92.6217	-11.4315	2.19266	-5.21355	1.85258e-07	2.17221e-06
Map2k6	86.5429	-36.5075	3.32856	-10.9679	5.45032e-28	2.56004e-26
6330411D24Rik	86.4777	-11.2671	1.01287	-11.1239	9.59856e-29	4.73182e-27
Cthrc1	86.4761	-11.5016	2.30329	-4.99355	5.92794e-07	6.51869e-06
Slc5a11	86.4677	-27.6831	3.57228	-7.74943	9.23064e-15	2.06722e-13
Nup62cl	85.056	-27.9656	2.84589	-9.82666	8.64407e-23	3.15687e-21
Irgm2	83.5312	-25.3039	3.80068	-6.65774	2.7807e-11	4.77639e-10
Gm43188	82.7312	-12.2031	2.59635	-4.7001	2.60039e-06	2.64069e-05
Zfp442	82.5586	-8.13674	1.99875	-4.07091	4.68289e-05	0.000415176
Afap1l1	82.231	-43.8041	2.69513	-16.2531	2.12477e-59	3.34977e-57
Smarca1	81.2959	-30.4448	3.73875	-8.14305	3.85434e-16	9.52991e-15
Sox2ot	80.8438	-10.1672	2.32325	-4.3763	1.20712e-05	0.000113869
Gm42701	80.8124	-33.8908	3.02618	-11.1992	4.11564e-29	2.05434e-27
Gm26802	80.1949	-26.5423	2.88807	-9.19033	3.91628e-20	1.23483e-18
C230085N15Rik	79.903	-26.1953	3.33297	-7.85944	3.85857e-15	8.86581e-14
Rims4	78.8654	-28.4093	2.48562	-11.4294	2.9799e-30	1.60301e-28
3110045C21Rik	78.4389	-37.1544	3.58431	-10.3658	3.54634e-25	1.49387e-23
Nipa1	77.3428	-24.3368	2.77831	-8.75957	1.96005e-18	5.61327e-17
Fam71a	77.2734	-25.9791	3.11775	-8.33263	7.90685e-17	2.05385e-15
Gm45073	76.6984	-26.5443	4.49745	-5.90207	3.5896e-09	5.14098e-08
Trim50	73.6399	-17.0659	3.88792	-4.38947	1.13627e-05	0.000107631
Pde7b	72.4877	-10.0838	2.36562	-4.26263	2.02038e-05	0.000186172
5730420D15Rik	69.5666	-7.86391	1.6706	-4.70724	2.51096e-06	2.55476e-05
Lamc2	68.4456	-25.2099	3.53103	-7.13953	9.36497e-13	1.80531e-11
Oas1b	68.2471	-27.6691	4.1492	-6.66853	2.58378e-11	4.44773e-10
Ano6	67.9101	-11.2481	2.23868	-5.02443	5.04939e-07	5.60289e-06
Prune2	66.7252	-11.786	2.12	-5.55945	2.70633e-08	3.51492e-07
Nfil3	66.6697	-25.5711	3.57513	-7.15249	8.52173e-13	1.64674e-11
Gm3325	65.5009	-11.4859	2.28202	-5.0332	4.82353e-07	5.35974e-06
1700094D03Rik	64.213	-25.9301	4.17695	-6.20792	5.36909e-10	8.22038e-09
Cebpd	64.1507	-26.6047	3.5175	-7.56353	3.92278e-14	8.39548e-13
2310015A10Rik	63.6475	-25.3553	2.74706	-9.22997	2.70708e-20	8.673e-19
Gm49417	62.4648	-10.8246	1.7859	-6.06117	1.35137e-09	1.99794e-08
Cryl1	62.0181	-27.6516	2.54051	-10.8843	1.37006e-27	6.30503e-26
Loxl2	61.9242	-11.0373	2.19733	-5.02305	5.08568e-07	5.63923e-06
Adamts9	60.8147	-10.7586	2.003	-5.37127	7.81833e-08	9.53957e-07
Heph	59.9434	-30.9682	3.2475	-9.53602	1.48416e-21	5.1407e-20
Kcna7	59.522	-18.9032	3.70724	-5.09901	3.41443e-07	3.86411e-06
E230020D15Rik	59.4504	-38.8668	3.79744	-10.235	1.38185e-24	5.64186e-23
Frmpd4	59.3676	-26.4624	3.9482	-6.70239	2.05037e-11	3.56809e-10
Gm4294	58.7492	-2.29142	0.468604	-4.88989	1.00894e-06	1.07461e-05
BC051408	58.7466	-33.327	3.91991	-8.50198	1.86377e-17	4.9877e-16
Tmem211	58.7081	-31.7548	2.77833	-11.4295	2.97946e-30	1.60301e-28
Slc25a41	58.7047	-10.9633	2.83749	-3.86372	0.000111673	0.000947851
Gm15915	58.4966	-10.9656	2.57612	-4.25662	2.07544e-05	0.000190914
Pla2g5	57.0615	-11.3598	2.65524	-4.27827	1.88349e-05	0.000174467
Sorcs2	56.6544	-28.1761	3.3462	-8.42033	3.75423e-17	9.92999e-16
Mmp28	55.9892	-26.1602	3.48043	-7.51637	5.63161e-14	1.19086e-12
Pygm	55.6672	-30.8452	3.32712	-9.27085	1.84662e-20	6.00076e-19
Gm48405	54.8961	-11.6135	2.98745	-3.88743	0.000101313	0.000864989
Cyp27a1	54.5387	-35.897	3.03955	-11.81	3.46614e-32	2.05938e-30
Prox1os	54.1921	-27.6685	3.19783	-8.65225	5.04927e-18	1.40069e-16
Rpl15-ps6	54.1687	-7.00602	0.639703	-10.952	6.49953e-28	3.04388e-26
Gm44190	54.1259	-10.7266	2.34771	-4.56896	4.90149e-06	4.8476e-05
Gm40614	53.6172	-10.8398	1.66831	-6.49748	8.16739e-11	1.34627e-09
Trim71	52.4328	-9.30932	1.8948	-4.91308	8.96582e-07	9.62661e-06
Gm15963	52.4151	-10.807	1.95164	-5.53743	3.06948e-08	3.97037e-07
Cdsn	51.8637	-10.7772	2.46667	-4.3691	1.24758e-05	0.000117337
Ephb4	51.3253	-35.7562	2.461	-14.5292	7.91883e-48	8.24128e-46
Fabp3-ps1	50.8472	-9.07636	1.32673	-6.84113	7.85715e-12	1.42331e-10
Efna4	50.6611	-11.3849	2.44914	-4.64855	3.34281e-06	3.36032e-05
Trim34a	50.5853	-32.1592	3.04514	-10.5608	4.52655e-26	1.95329e-24
Rai14	50.55	-9.75378	2.36669	-4.12127	3.76784e-05	0.000336674
Mybph	50.3731	-10.4872	1.77445	-5.91012	3.41864e-09	4.92625e-08
Gm10570	49.7979	-25.5116	3.2356	-7.88466	3.15393e-15	7.31005e-14
Gm45153	49.074	-32.8296	3.85998	-8.50513	1.814e-17	4.86267e-16
Mamld1	48.4784	-29.9109	4.62341	-6.46945	9.83578e-11	1.61127e-09
Paqr4	48.4073	-36.9812	4.34429	-8.51259	1.70084e-17	4.56704e-16
Tox3	48.2001	-20.4291	3.12696	-6.53322	6.43714e-11	1.0778e-09
D630039A03Rik	47.6348	-43.0563	2.87028	-15.0007	7.26008e-51	8.43812e-49
Gm19410	47.1473	-11.4385	2.8298	-4.04215	5.29631e-05	0.000466187
2410018L13Rik	47.0101	-6.73247	1.53407	-4.38864	1.14063e-05	0.000107915
Lxn	46.7643	-25.2575	2.90963	-8.68066	3.93465e-18	1.10496e-16
Tbc1d4	46.24	-41.7876	2.48269	-16.8316	1.43249e-63	2.8512e-61
1700086P04Rik	46.0404	-29.3807	3.95095	-7.43636	1.03497e-13	2.14303e-12
4933412E12Rik	44.5323	-24.0495	3.06491	-7.84674	4.26975e-15	9.76828e-14
Zfp429	44.2234	-24.6231	3.66321	-6.72172	1.79595e-11	3.1529e-10
Gm45205	42.7731	-27.8472	3.6284	-7.67477	1.65719e-14	3.65476e-13
Lacc1	42.549	-26.2066	4.25697	-6.15615	7.45344e-10	1.12281e-08
Gm36757	41.9429	-26.6588	4.93215	-5.40511	6.47685e-08	8.00085e-07
Gm3336	41.8436	-26.6888	4.09002	-6.52535	6.78434e-11	1.13236e-09
Zfp605	41.449	-24.7955	3.19522	-7.7602	8.47944e-15	1.90434e-13
Fam189b	40.7067	-21.6583	3.41009	-6.35124	2.13585e-10	3.37393e-09
Hyi	39.6321	-25.7496	3.0132	-8.54559	1.27883e-17	3.45718e-16
Calhm2	38.9605	-26.8643	3.93879	-6.82044	9.07599e-12	1.63666e-10
Gm9625	38.8505	-8.5749	1.17877	-7.27444	3.47869e-13	6.92391e-12
Apol7b	36.4132	-35.8812	3.57041	-10.0496	9.22564e-24	3.56553e-22
4921513I03Rik	36.386	-37.2713	4.22486	-8.82192	1.12517e-18	3.26341e-17
Gab2	35.5576	-24.1677	3.08133	-7.84329	4.38895e-15	9.99789e-14
Rpgrip1	34.9599	-24.8204	3.46149	-7.17045	7.47491e-13	1.45505e-11
Ifi44	34.2434	-26.1364	4.79276	-5.45331	4.94419e-08	6.2087e-07
Gm26912	34.05	-23.7151	4.74635	-4.9965	5.83808e-07	6.42875e-06
Rfpl4	34.0345	-25.6405	2.87058	-8.93216	4.17776e-19	1.24574e-17
9630050E16Rik	33.8642	-9.35037	1.92551	-4.85604	1.19754e-06	1.26953e-05
Avil	33.7269	-25.6794	3.15004	-8.15208	3.57728e-16	8.85864e-15
Pir	33.6969	-30.5224	4.09499	-7.4536	9.08289e-14	1.89055e-12
2310016G11Rik	33.3912	-10.4957	2.47902	-4.23379	2.29785e-05	0.00021028
Gm12279	33.1253	-25.3248	3.01129	-8.40995	4.10185e-17	1.08135e-15
E430014B02Rik	32.3165	-23.8859	3.56539	-6.69937	2.09316e-11	3.63066e-10
Tprg	31.8236	-32.4735	4.77846	-6.79581	1.07708e-11	1.92484e-10
Arhgef10	31.6549	-26.669	3.24946	-8.20723	2.26349e-16	5.67583e-15
Rpl15-ps2	30.4823	-5.94952	0.602894	-9.86827	5.71402e-23	2.11591e-21
Mpl	29.3156	-31.7594	3.59088	-8.84447	9.19622e-19	2.68681e-17
Top1mt	28.9728	-23.6281	3.63613	-6.49813	8.13234e-11	1.34188e-09
2810032G03Rik	28.7551	-29.3755	4.93219	-5.95587	2.58692e-09	3.75835e-08
Gm45873	28.4227	-20.4871	4.43938	-4.61485	3.93382e-06	3.9247e-05
Gm26207	27.5438	-28.7406	3.80042	-7.56248	3.95467e-14	8.45239e-13
Rapgef4	26.8753	-22.5218	4.26949	-5.27505	1.32718e-07	1.57707e-06
Gm27151	26.259	-9.76858	1.75819	-5.55605	2.75952e-08	3.58107e-07
Lipa	26.102	-20.1137	3.22888	-6.22931	4.68486e-10	7.22839e-09
Gm29642	25.923	-24.4793	4.17141	-5.86836	4.40119e-09	6.23488e-08
Scin	25.8321	-28.729	4.88305	-5.88341	4.0189e-09	5.73414e-08
Gm46430	25.7975	-25.613	1.83463	-13.9608	2.70265e-44	2.5769e-42
Gm42699	25.6825	-24.5238	4.21642	-5.81627	6.01765e-09	8.41256e-08
S100a3	25.5647	-21.848	4.4216	-4.94121	7.7641e-07	8.41005e-06
4930422I22Rik	25.5304	-9.52734	1.95684	-4.86873	1.12316e-06	1.19386e-05
Gm13596	25.18	-38.5825	4.15005	-9.29689	1.44612e-20	4.74776e-19
Tor4a	25.1334	-27.3792	4.9322	-5.55111	2.83859e-08	3.6777e-07
Gm37570	24.5802	-35.4088	3.53427	-10.0187	1.26135e-23	4.8164e-22
Gm5905	24.4844	-3.04659	0.783268	-3.88958	0.000100416	0.000857792
Usp18	24.3524	-37.6714	4.93221	-7.63783	2.20909e-14	4.81853e-13
Gm41177	24.3068	-26.3611	4.52592	-5.82447	5.72932e-09	8.03771e-08
3110001I22Rik	23.9611	-27.6592	3.82325	-7.23446	4.6739e-13	9.24503e-12
Pot1b	23.6713	-26.8388	3.32068	-8.08233	6.35406e-16	1.53296e-14
H2-Q4	23.1515	-23.6814	4.26857	-5.54785	2.89197e-08	3.7438e-07
Herc6	23.1412	-25.2144	4.85144	-5.1973	2.02202e-07	2.36045e-06
Gm6658	22.7371	-31.7342	4.93222	-6.43407	1.2423e-10	2.0062e-09
Gm10636	22.4139	-29.2269	4.79068	-6.10078	1.05553e-09	1.57962e-08
Arg1	22.0825	-16.5272	4.11278	-4.0185	5.857e-05	0.000514118
Ptch2	21.7473	-26.738	4.25462	-6.28446	3.28994e-10	5.1409e-09
Gm45640	21.6851	-32.8852	3.44198	-9.55416	1.24595e-21	4.34118e-20
A930005G22Rik	21.6569	-23.8706	3.13979	-7.6026	2.90239e-14	6.27066e-13
Mycn	21.6123	-24.0765	3.89632	-6.1793	6.43871e-10	9.79212e-09
Gm49377	21.48	-10.4319	1.95352	-5.34004	9.29248e-08	1.12349e-06
Gng11	21.2245	-33.7414	4.01681	-8.40005	4.46306e-17	1.17076e-15
Slc45a1	21.0205	-25.2862	3.52927	-7.16471	7.79525e-13	1.51555e-11
Bnip3l-ps	20.89	-2.01851	0.428683	-4.70864	2.4938e-06	2.54054e-05
Gm38235	20.8764	-35.1926	3.86581	-9.10354	8.74381e-20	2.69821e-18
Gm11696	20.8294	-22.0499	3.85075	-5.72613	1.02747e-08	1.39356e-07
3300002I08Rik	20.3347	-9.9246	2.55102	-3.89044	0.000100062	0.000855229
Gbp6	20.1936	-30.1413	4.71356	-6.39459	1.60974e-10	2.56832e-09
Ptgds	20.1575	-26.2665	3.29901	-7.96194	1.69369e-15	3.98943e-14
9530018F02Rik	19.0879	-37.1216	3.30204	-11.242	2.53486e-29	1.28954e-27
Gm19181	18.8339	-28.0234	3.81341	-7.34865	2.00226e-13	4.05107e-12
Gm17835	18.6502	-33.4905	4.60796	-7.26798	3.64895e-13	7.24466e-12
Cyb5r2	18.5347	-34.8493	4.0452	-8.61497	6.99585e-18	1.914e-16
Gm15387	18.5243	-3.05877	0.742859	-4.11757	3.82884e-05	0.000341933
Rbp1	18.1927	-18.7189	4.45022	-4.2063	2.59585e-05	0.000236193
Gm22068	17.498	-39.0936	3.21002	-12.1786	4.04015e-34	2.63653e-32
Gm29170	17.0184	-24.268	3.75721	-6.45905	1.05361e-10	1.71892e-09
Gm5129	16.871	-32.6064	3.68538	-8.84748	8.95195e-19	2.62025e-17
Psenen-ps	16.7435	-4.16426	0.610117	-6.82536	8.7708e-12	1.585e-10
Kcnh6	16.7378	-22.5115	4.57079	-4.92507	8.43316e-07	9.08534e-06
Gm16124	16.6768	-24.6292	4.11111	-5.99088	2.08709e-09	3.0601e-08
Cdyl2	16.4032	-19.8979	3.21575	-6.18765	6.1069e-10	9.31419e-09
Gm9895	16.3899	-30.0215	3.49444	-8.5912	8.60652e-18	2.33859e-16
Gm4032	16.2685	-23.5687	3.08375	-7.64288	2.12424e-14	4.64618e-13
Trabd2b	15.9452	-24.5156	3.8263	-6.40713	1.48286e-10	2.3778e-09
Castor1	15.6776	-26.4038	4.93228	-5.35327	8.63788e-08	1.04833e-06
Fam57a	15.6477	-23.7439	4.52283	-5.24978	1.52278e-07	1.79344e-06
Fam177a2	15.5757	-3.69853	0.718156	-5.15004	2.60431e-07	2.98549e-06
Gm14820	15.417	-30.3309	4.64745	-6.52635	6.73901e-11	1.12597e-09
Ercc8	15.408	-23.1134	3.32474	-6.95196	3.60253e-12	6.70913e-11
Stpg1	15.2927	-25.5304	4.57666	-5.57839	2.42752e-08	3.17091e-07
Gm49221	15.265	-23.5943	3.78554	-6.23275	4.58322e-10	7.08529e-09
Gm44640	15.1802	-42.4958	4.14267	-10.2581	1.08844e-24	4.48994e-23
Zfp951	15.0346	-22.5558	4.21931	-5.34586	8.99897e-08	1.09049e-06
Zfp583	15.0321	-25.0671	4.93244	-5.08209	3.73305e-07	4.20378e-06
Klrg2	15.0228	-35.3245	4.93229	-7.16188	7.95778e-13	1.5415e-11
Tet1	14.8846	-32.1206	4.4778	-7.17331	7.32043e-13	1.42672e-11
Pou2f2	14.8591	-41.9261	2.83302	-14.7991	1.4849e-49	1.64195e-47
Relt	14.746	-24.7231	3.16711	-7.80619	5.89424e-15	1.33315e-13
Gm43343	14.6661	-25.1522	3.40065	-7.39629	1.40042e-13	2.8505e-12
Gm42995	14.5792	-24.1517	3.92666	-6.15069	7.71466e-10	1.15887e-08
Gm11520	14.466	-24.3578	4.9366	-4.93414	8.05065e-07	8.69088e-06
Gm10643	14.338	-22.7865	3.9444	-5.77692	7.608e-09	1.04885e-07
Gm15541	14.2889	-26.3144	3.45481	-7.61673	2.60176e-14	5.64411e-13
Crtap	13.9325	-33.2327	4.1458	-8.01599	1.09256e-15	2.58114e-14
Gm43289	13.6719	-28.8288	4.93231	-5.8449	5.06884e-09	7.1616e-08
Pld2	13.5974	-26.7531	4.93231	-5.42404	5.82665e-08	7.23695e-07
Cidec	13.5084	-24.4865	4.4539	-5.49778	3.84604e-08	4.91102e-07
4933406C10Rik	13.4422	-25.9138	4.13226	-6.2711	3.58511e-10	5.57477e-09
4930451G09Rik	13.3574	-28.3996	3.12247	-9.09523	9.43843e-20	2.90693e-18
Gm45762	13.2716	-25.6111	4.93232	-5.19251	2.07475e-07	2.4114e-06
Ptpn5	13.2578	-34.1829	4.93232	-6.9304	4.19659e-12	7.74302e-11
Gm49172	13.117	-27.852	3.99357	-6.97421	3.07601e-12	5.73528e-11
Gm25047	13.0461	-27.9599	4.59909	-6.07943	1.20614e-09	1.79322e-08
Myh15	12.7721	-28.6333	4.93232	-5.80523	6.42766e-09	8.96999e-08
Nmnat3	12.7217	-19.2404	3.61638	-5.32035	1.0357e-07	1.24277e-06
Zfp280c	12.5709	-21.9193	4.13268	-5.3039	1.13352e-07	1.35301e-06
Pp2d1	12.4947	-24.0865	4.30292	-5.5977	2.17215e-08	2.85844e-07
BC049352	12.4041	-26.6456	4.93233	-5.40223	6.58164e-08	8.1177e-07
Teddm2	12.2319	-8.70784	2.04268	-4.26294	2.01755e-05	0.000186112
Gm29361	12.0977	-24.3816	4.93236	-4.9432	7.6852e-07	8.33593e-06
Crb2	11.9395	-17.523	3.57977	-4.89501	9.83001e-07	1.04838e-05
Gm18422	11.7479	-32.2367	4.93236	-6.53577	6.32848e-11	1.06072e-09
Rab27a	11.7176	-29.734	4.56024	-6.52026	7.01859e-11	1.16738e-09
Rasl11a	11.7035	-32.9391	4.93236	-6.67816	2.41966e-11	4.17424e-10
Gm48683	11.6571	-19.6489	4.46674	-4.39893	1.08787e-05	0.000103354
Gm37935	11.5795	-26.9369	4.93235	-5.46127	4.72748e-08	5.96007e-07
Gm43737	11.4373	-28.5613	4.53611	-6.29643	3.04577e-10	4.7781e-09
Gm45555	11.2963	-25.3923	4.93236	-5.14811	2.63128e-07	3.01207e-06
Gm20472	11.2903	-25.9662	3.28445	-7.90579	2.6623e-15	6.20671e-14
Oasl2	11.2891	-25.6239	3.127	-8.19441	2.51831e-16	6.28511e-15
Gm43339	11.0813	-25.682	4.73876	-5.41957	5.97426e-08	7.40297e-07
Myrf	11.08	-21.9195	3.92341	-5.58685	2.31228e-08	3.03047e-07
Gprc5a	11.0273	-27.6145	4.93241	-5.59858	2.16108e-08	2.84623e-07
Slc35d2	10.8347	-33.6526	3.6293	-9.27249	1.81856e-20	5.92166e-19
Rnft2	10.4086	-24.4584	3.0765	-7.95006	1.86425e-15	4.37823e-14
Olfr482	10.2635	-5.20061	0.525003	-9.90585	3.92599e-23	1.46745e-21
Gm17249	10.1978	-26.3468	4.71586	-5.58684	2.31239e-08	3.03047e-07
Aars2	10.1719	-21.656	3.75385	-5.76901	7.97372e-09	1.09737e-07
Cdk19os	9.90448	-23.4533	3.49934	-6.70221	2.0529e-11	3.56859e-10
Gm45698	9.89826	-23.9087	4.95838	-4.82187	1.4222e-06	1.48789e-05
Dubr	9.89656	-21.596	4.01166	-5.38331	7.3128e-08	8.9595e-07
Tmem88	9.86217	-25.7279	3.70343	-6.94705	3.73e-12	6.9384e-11
Gm43254	9.77603	-31.7787	4.6607	-6.81844	9.20313e-12	1.65771e-10
Oas1a	9.6422	-27.4776	4.9324	-5.57083	2.53524e-08	3.30785e-07
Gm47867	9.62009	-23.2338	4.08165	-5.69225	1.25374e-08	1.68609e-07
8030442B05Rik	9.50115	-28.7955	4.93241	-5.83801	5.2827e-09	7.43735e-08
Ajap1	9.39953	-27.5552	4.93241	-5.58656	2.31611e-08	3.03284e-07
Dlc1	9.37101	-25.9045	4.93242	-5.2519	1.5054e-07	1.77539e-06
Gm9824	9.33396	-2.15009	0.44575	-4.82352	1.41045e-06	1.47656e-05
Gm42576	9.31617	-25.1986	4.27155	-5.89917	3.65325e-09	5.22647e-08
Gm8221	9.15087	-28.6985	4.93242	-5.81833	5.94388e-09	8.32404e-08
Sh3bp1	9.1254	-30.4483	4.93392	-6.17123	6.77621e-10	1.02662e-08
Fstl1	9.05078	-24.6948	2.51005	-9.83836	7.69576e-23	2.82349e-21
Gm6548	9.01019	-24.3772	4.47946	-5.44201	5.2683e-08	6.58972e-07
Lag3	8.85442	-31.5315	4.93244	-6.39268	1.62999e-10	2.59803e-09
A830019P07Rik	8.8255	-31.1536	4.1359	-7.53248	4.97872e-14	1.05701e-12
Kcnb1	8.71151	-18.2484	4.28544	-4.25823	2.06055e-05	0.000189764
Morf4l1-ps1	8.65434	-3.41802	0.54445	-6.27794	3.4309e-10	5.3559e-09
Ccdc13	8.64444	-20.8752	4.47033	-4.66972	3.01612e-06	3.04153e-05
4930513N10Rik	8.61913	-27.9323	4.93244	-5.66298	1.48767e-08	1.99061e-07
Irak3	8.60938	-21.9005	4.95838	-4.41687	1.0014e-05	9.57679e-05
Poglut3	8.49804	-30.4158	4.93461	-6.16376	7.10359e-10	1.07417e-08
9530097N15Rik	8.26282	-27.0252	4.94454	-5.46567	4.61157e-08	5.81855e-07
Mboat1	8.13541	-41.0385	4.93256	-8.31993	8.8017e-17	2.27147e-15
Fam83e	8.11598	-26.4057	3.59784	-7.33933	2.14667e-13	4.33775e-12
Gm7785	8.10746	-19.384	3.00189	-6.45728	1.06603e-10	1.7374e-09
4930593A02Rik	8.05349	-25.455	4.61068	-5.52087	3.37316e-08	4.34249e-07
Gm13827	8.01038	-29.1648	4.93247	-5.91281	3.36325e-09	4.85692e-08
Apex2	8.00016	-23.5755	4.62233	-5.10034	3.39036e-07	3.83959e-06
Gm37019	7.99892	-29.8535	4.93247	-6.05244	1.42668e-09	2.10343e-08
Crygd	7.84974	-31.1224	4.93249	-6.30968	2.79606e-10	4.39938e-09
Gm49328	7.7948	-6.72881	1.66391	-4.04397	5.25532e-05	0.00046309
Gm28187	7.72667	-30.9051	4.93249	-6.26562	3.71342e-10	5.75743e-09
Chst12	7.63172	-26.8826	4.93249	-5.45012	5.03369e-08	6.31611e-07
Sh2d6	7.60707	-34.8174	4.93767	-7.0514	1.77131e-12	3.34971e-11
Gm43868	7.5175	-31.2799	4.9325	-6.34159	2.27401e-10	3.58861e-09
Gpi-ps	7.50584	-4.52434	0.793541	-5.70146	1.18787e-08	1.60156e-07
Chst14	7.40697	-43.1625	4.93256	-8.75052	2.12369e-18	6.04929e-17
Degs2	7.32751	-25.3734	4.93251	-5.14412	2.68778e-07	3.07454e-06
Gm48532	7.22687	-34.4003	3.95404	-8.70004	3.31757e-18	9.36625e-17
Fut4	7.17782	-21.8057	4.9335	-4.41994	9.87297e-06	9.45892e-05
Inhba	7.08435	-34.7621	4.01791	-8.65179	5.06986e-18	1.40395e-16
Gm13920	6.95464	-23.1498	2.63762	-8.77676	1.68245e-18	4.82695e-17
Hadhb-ps	6.82222	-2.70263	0.588765	-4.59034	4.42522e-06	4.39842e-05
Rbm41	6.81402	-25.3512	4.93268	-5.13944	2.75563e-07	3.14763e-06
Gm11592	6.77738	-28.5015	4.93256	-5.77823	7.54885e-09	1.0425e-07
Hivep3	6.71227	-17.3623	3.42468	-5.06976	3.98314e-07	4.47906e-06
Zfp764	6.69423	-31.5587	4.93429	-6.39579	1.59722e-10	2.5509e-09
Gm23887	6.68714	-27.2319	4.93255	-5.52086	3.37352e-08	4.34249e-07
Gm44624	6.66657	-24.6671	4.60364	-5.35818	8.40661e-08	1.02182e-06
Nxf7	6.64837	-28.8126	4.93255	-5.84132	5.1789e-09	7.3106e-08
Gm43571	6.56406	-31.4287	4.93256	-6.37167	1.86978e-10	2.97131e-09
Zbtb16	6.51457	-27.1727	4.93256	-5.50884	3.61199e-08	4.62701e-07
Gm13448	6.48949	-27.8661	4.93256	-5.64941	1.61003e-08	2.15252e-07
Gm41492	6.3615	-28.3395	4.55343	-6.22376	4.85373e-10	7.4817e-09
Gm43681	6.36033	-25.5657	4.94369	-5.17139	2.32364e-07	2.67917e-06
Gm24277	6.32051	-26.6934	4.93258	-5.41165	6.24456e-08	7.73189e-07
4921516A02Rik	6.27213	-29.8383	4.66867	-6.39118	1.64613e-10	2.62114e-09
Gm2415	6.24169	-7.73317	1.69232	-4.56958	4.8871e-06	4.83638e-05
Grin3b	6.20002	-32.2815	4.95838	-6.51049	7.49069e-11	1.23986e-09
1700019L13Rik	6.18951	-24.949	3.47245	-7.18483	6.72887e-13	1.3195e-11
Dcdc2b	6.18662	-33.7733	4.93277	-6.84673	7.55573e-12	1.37027e-10
Rhod	6.16144	-25.8346	4.93259	-5.23754	1.62734e-07	1.91092e-06
Gm29966	6.15469	-25.5026	4.93259	-5.17022	2.33816e-07	2.69396e-06
Ddo	6.10685	-26.7898	4.93259	-5.43117	5.5985e-08	6.9699e-07
Gm5527	6.09321	-2.73984	0.502966	-5.44736	5.11238e-08	6.4098e-07
H2bc9	6.03026	-23.237	4.93269	-4.71083	2.46713e-06	2.5166e-05
Pik3c2g	6.00664	-26.7719	4.9326	-5.42753	5.71391e-08	7.10247e-07
Gm44220	5.90863	-26.9631	4.93261	-5.46628	4.59571e-08	5.80774e-07
Gm37022	5.90059	-32.0856	4.93261	-6.50478	7.78066e-11	1.28576e-09
Parvaos	5.89365	-27.7237	4.93261	-5.62048	1.90423e-08	2.52887e-07
Ap4m1	5.8286	-21.1456	4.93317	-4.28642	1.81579e-05	0.000168588
Gpr45	5.81453	-20.3928	4.94361	-4.12508	3.70604e-05	0.00033171
F830112A20Rik	5.81287	-24.9842	4.93284	-5.06486	4.08695e-07	4.58609e-06
Pgam1-ps2	5.71882	-3.62938	0.854516	-4.24729	2.16367e-05	0.000198686
Gm29418	5.64218	-28.9723	4.94781	-5.85557	4.75385e-09	6.7285e-08
Zfp111	5.64042	-24.9638	4.93264	-5.06095	4.17169e-07	4.66474e-06
Gm10699	5.58762	-26.6751	4.93264	-5.40787	6.3779e-08	7.88473e-07
D630036H23Rik	5.5269	-23.657	3.96204	-5.9709	2.3595e-09	3.44681e-08
Gm37736	5.43851	-24.8545	4.93266	-5.03877	4.6853e-07	5.21706e-06
A330093E20Rik	5.43363	-29.8414	4.94664	-6.03266	1.61286e-09	2.37133e-08
Gm13648	5.42644	-22.3139	4.66767	-4.78051	1.74847e-06	1.80551e-05
Gm47071	5.31177	-19.1359	3.88852	-4.92113	8.60445e-07	9.25734e-06
5730419F03Rik	5.30414	-24.1247	4.7905	-5.03594	4.75516e-07	5.29115e-06
Thnsl2	5.28596	-26.7965	4.93267	-5.43245	5.5587e-08	6.93119e-07
Xlr3a	5.26787	-24.4053	4.95838	-4.92203	8.56511e-07	9.22125e-06
Gm13561	5.22568	-6.67565	1.24898	-5.34488	9.0479e-08	1.09559e-06
Gm38248	5.21089	-26.2903	4.93269	-5.32981	9.83151e-08	1.18238e-06
Gm48822	5.14294	-39.9199	4.9389	-8.08276	6.33182e-16	1.52992e-14
D230030E09Rik	5.12595	-26.7368	4.93269	-5.42033	5.94897e-08	7.38313e-07
A830008E24Rik	5.05912	-26.8213	4.9327	-5.43745	5.40477e-08	6.74981e-07
Efcab7	5.03259	-23.8183	4.93272	-4.82863	1.37477e-06	1.44301e-05
Hykk	4.9953	-21.6473	4.93342	-4.38788	1.14459e-05	0.000108226
Pnma5	4.98586	-31.7013	4.77312	-6.64162	3.10253e-11	5.31772e-10
Gm2822	4.96874	-28.5358	4.93279	-5.78493	7.25421e-09	1.00617e-07
Fam177a	4.94222	-4.52242	0.840088	-5.38326	7.31479e-08	8.9595e-07
Arhgap33os	4.90405	-27.6475	4.93272	-5.60492	2.08352e-08	2.7509e-07
Gm23444	4.86945	-31.2071	4.95838	-6.2938	3.0978e-10	4.85494e-09
Gm14335	4.86321	-20.8368	4.94199	-4.21628	2.48367e-05	0.000226244
Rnu12	4.76178	-26.3219	4.93274	-5.33616	9.4936e-08	1.14433e-06
2310002F09Rik	4.67946	-27.2027	4.93275	-5.51472	3.49336e-08	4.48587e-07
Gm42979	4.65244	-33.5301	4.93299	-6.79711	1.0674e-11	1.91184e-10
Abtb2	4.64548	-21.493	4.93506	-4.35516	1.32972e-05	0.000124694
Gm44894	4.52472	-27.1699	4.93277	-5.50803	3.62879e-08	4.64479e-07
Fzd10os	4.49198	-32.2538	4.93279	-6.53865	6.20748e-11	1.04263e-09
Fndc7	4.48756	-26.5503	4.93278	-5.38242	7.34925e-08	8.99479e-07
Gm31152	4.42924	-38.6152	4.9328	-7.82824	4.94735e-15	1.12538e-13
Gm29458	4.38419	-26.2583	4.9328	-5.3232	1.01957e-07	1.22433e-06
Rtraf-ps	4.38027	-4.85459	0.958691	-5.06378	4.11032e-07	4.60582e-06
Gm37860	4.37572	-33.3565	4.9328	-6.76218	1.35931e-11	2.41566e-10
Pdgfb	4.2637	-30.8436	4.95838	-6.22049	4.95608e-10	7.62471e-09
Cfap44	4.2032	-24.4425	4.93283	-4.95505	7.23099e-07	7.88084e-06
Tns3	4.0653	-39.3276	4.02413	-9.77295	1.47103e-22	5.28742e-21
Gm49494	4.02388	-31.9557	4.9329	-6.47807	9.29004e-11	1.52343e-09
Gm47111	4.00192	-24.1254	4.64466	-5.19422	2.05579e-07	2.39462e-06
Gm11627	3.99077	-25.6841	4.93364	-5.2059	1.93054e-07	2.25864e-06
Gm5620	3.9683	-2.02209	0.522736	-3.86829	0.000109601	0.000931259
Ppp1r16b	3.89543	-24.2055	4.93289	-4.90695	9.25017e-07	9.91188e-06
Il1r1	3.89486	-26.3096	4.93289	-5.3335	9.6338e-08	1.16035e-06
Gm49964	3.8361	-27.0305	4.9329	-5.47964	4.26204e-08	5.40752e-07
Zfp72	3.83287	-30.1032	4.93494	-6.10002	1.06053e-09	1.58562e-08
Gm29681	3.81906	-26.8638	4.9329	-5.44584	5.15617e-08	6.45453e-07
Mir706	3.79801	-28.3406	4.93291	-5.74522	9.18038e-09	1.25368e-07
Gm49727	3.784	-24.2584	4.93291	-4.91766	8.75847e-07	9.41033e-06
Gm4544	3.75331	-19.0117	4.87221	-3.90206	9.5377e-05	0.00081606
Gm22901	3.71968	-26.7919	4.93293	-5.43125	5.59619e-08	6.9699e-07
Gm36930	3.71461	-26.5894	4.93293	-5.39019	7.03835e-08	8.63971e-07
Mybphl	3.71281	-27.0915	4.93293	-5.49197	3.97472e-08	5.06315e-07
4921507G05Rik	3.62705	-24.3765	4.93458	-4.93993	7.81488e-07	8.45356e-06
Nudt17	3.52618	-39.6939	4.93298	-8.04664	8.50998e-16	2.03766e-14
Gng5-ps	3.5093	-4.67848	0.746283	-6.26904	3.63273e-10	5.63781e-09
Gm10250	3.39404	-3.23362	0.833817	-3.87809	0.000105278	0.000896916
6030407O03Rik	3.36995	-25.4171	4.93303	-5.15244	2.57116e-07	2.94961e-06
Cdkn2b	3.19066	-26.3441	4.93307	-5.34032	9.27831e-08	1.12263e-06
Myh7b	3.06167	-20.89	3.49944	-5.96953	2.37941e-09	3.47272e-08
Gm19705	3.04664	-27.9535	4.93311	-5.66651	1.45735e-08	1.95167e-07
Gm42520	2.96891	-26.1295	4.95761	-5.27058	1.35993e-07	1.61358e-06
Gm9844	2.62808	-3.65053	0.703494	-5.18915	2.1126e-07	2.4536e-06
Gm13342	2.58117	-4.24786	0.687947	-6.17469	6.62946e-10	1.0063e-08
E030024N20Rik	2.46364	-3.42995	0.831614	-4.12445	3.71624e-05	0.00033225
Gm18994	2.03195	-22.1885	4.95838	-4.47494	7.64333e-06	7.39397e-05
Nkapl	1.814	-23.8398	4.95838	-4.80799	1.52458e-06	1.58665e-05
Gm19774	1.81189	-2.69171	0.699116	-3.85016	0.00011804	0.000999765
Gm14165	1.63377	-4.70622	0.740921	-6.35186	2.12732e-10	3.36379e-09
Gm3150	1.55211	-4.5368	0.910783	-4.98121	6.31893e-07	6.92472e-06
Gm8483	1.38209	-3.9535	0.95147	-4.15515	3.2508e-05	0.000292443

## Sheet: overlap with SC gene
The entire list of 331 genes that both were higher expressed in P60_WT SCs than in OHC-like cells, and were overlapped with P60_WT SC-enriched genes
Figure 6-figure supplement 2A
Gene names
Clu
Dbi
Fabp3
Odf3l2
Mdm1
Prdx6
Plekhb1
Actn4
Far1
Septin7
9530077C05Rik
Gng5
Gas2
Gjb6
Cnn3
Sypl
Tspan8
Rflnb
Zfp36
Elovl1
Map2k1
Slc44a2
Rnd2
Scamp1
Rorb
Sptbn1
Cav2
Glul
Liph
Enah
Mal
Socs6
Tmem79
Fam107a
Npc1
Gjb2
Tuba1b
Egfl6
Smox
Kif2a
Serpine2
Cav1
Tm4sf1
Zp1
Fxyd6
Zyx
Tmem221
Fblim1
Kcnj10
Acss3
Il17re
Zfp36l1
Fibin
Gm16136
Rasgrp1
Pls3
Zfp185
Erbin
St3gal6
Pinlyp
Creb3l4
Stx11
Rhoj
Ntn4
Dennd2d
Fam174b
Palm
Dclk3
Ppp2r2b
Tectb
Sox10
F12
Lpar3
Mmp14
Aox2
Extl1
Fut2
Tmprss2
B4galnt1
Gm19345
Nupr1
Rusc2
Vstm4
Dhrs3
Bcl6
Tnnt1
Aebp1
Gm8730
Tulp3
Pdgfd
Rcan2
Scube2
Kif1c
Trim29
Arhgef6
Pgm5
Enpp3
Trim56
Ackr3
Tcf7l1
Cpne2
Nkd2
Mypn
Psapl1
Camk1d
2610528J11Rik
H2-Q10
Echdc3
Egfros
6330411D24Rik
Cthrc1
Irgm2
Zfp442
Smarca1
Rims4
Fam71a
Trim50
5730420D15Rik
Lamc2
Oas1b
Ano6
Prune2
Nfil3
Gm3325
Cryl1
Loxl2
Adamts9
Heph
BC051408
Tmem211
Slc25a41
Gm15915
Pla2g5
Sorcs2
Mmp28
Gm48405
Cyp27a1
Prox1os
Gm44190
Gm40614
Gm15963
Cdsn
Fabp3-ps1
Efna4
Trim34a
Rai14
Mybph
Mamld1
Paqr4
Gm19410
2410018L13Rik
Lxn
Tbc1d4
Lacc1
Gm36757
Gm3336
Zfp605
Ifi44
Gm26912
9630050E16Rik
Pir
Tprg
Arhgef10
Mpl
Top1mt
2810032G03Rik
Gm27151
Gm29642
Scin
S100a3
4930422I22Rik
Tor4a
Gm5905
3110001I22Rik
Pot1b
H2-Q4
Gm6658
Ptch2
Gm45640
A930005G22Rik
Mycn
Gm49377
Gng11
Gm11696
3300002I08Rik
Gbp6
Ptgds
Gm19181
Gm17835
Cyb5r2
Rbp1
Gm5129
Psenen-ps
Kcnh6
Gm16124
Gm9895
Gm4032
Trabd2b
Castor1
Fam177a2
Gm14820
Gm49221
Zfp951
Tet1
Gm11520
Gm15541
Crtap
Gm43289
Cidec
4933406C10Rik
4930451G09Rik
Ptpn5
Gm49172
Gm25047
Myh15
Pp2d1
BC049352
Teddm2
Gm29361
Gm18422
Rab27a
Rasl11a
Gm37935
Gm43737
Gm45555
Gm20472
Gm43339
Gprc5a
Slc35d2
Olfr482
Gm17249
Cdk19os
Dubr
Tmem88
Oas1a
8030442B05Rik
Ajap1
Gm8221
Gm6548
Lag3
Morf4l1-ps1
Ccdc13
4930513N10Rik
Irak3
Poglut3
Fam83e
4930593A02Rik
Gm13827
Gm37019
Crygd
Gm49328
Gm28187
Chst12
Gm43868
Gpi-ps
Degs2
Fut4
Hadhb-ps
Zfp764
Gm23887
Gm44624
Nxf7
Gm43571
Zbtb16
Gm13448
Gm41492
Gm43681
Gm24277
4921516A02Rik
Gm2415
1700019L13Rik
Dcdc2b
Rhod
Gm29966
Ddo
Pik3c2g
Gm44220
Gm37022
Parvaos
Ap4m1
Gpr45
F830112A20Rik
Gm10699
Gm37736
Gm47071
Thnsl2
Xlr3a
Gm13561
Gm38248
D230030E09Rik
A830008E24Rik
Hykk
Gm2822
Fam177a
Arhgap33os
Gm14335
Rnu12
2310002F09Rik
Gm42979
Abtb2
Gm44894
Fzd10os
Fndc7
Gm29458
Cfap44
Gm49494
Gm47111
Gm11627
Gm5620
Ppp1r16b
Il1r1
Gm49964
Zfp72
Gm29681
Mir706
Gm49727
Gm22901
Gm36930
Mybphl
4921507G05Rik
Gng5-ps
6030407O03Rik
Cdkn2b
Gm19705
Gm42520
Gm9844
Gm13342
Gm18994
Nkapl
Gm14165
Gm3150
