# Supplementary material for: Dual expression of Atoh1 and Ikzf2 promotes transformation of adult cochlear supporting cells into outer hair cells
Source: eLife journal article supplement (doi:10.7554/elife.66547), 2021-09-03
Supplement: supp [file elife-66547-supp-v1.zip › elife_poa_e66547_Supplemental_file_5.xlsx]

## Sheet: P1-OHC enriched genes
P1-OHC enriched genes	OHC_like_cells-1	OHC_like_cells-2	OHC_like_cells-3	OHC_like_cells-4	OHC_like_cells-5	OHC_like_cells-6	OHC_like_cells-7	OHC_like_cells-8	OHC_like_cells-9	OHC_like_cells-10	OHC_like_cells-11		Averaged TPM	Notes	Figure 6-figure supplement 6A
Ldhb	3524.49	513.1	4500.97	392.585	1497.57	2047.87	2969.72	1321	1164.54	2480.48	2188.88		2054.65	Averaged TPM>16 and 6 or more cells with TPM>16
Anxa4	666.184	851.371	979.979	236.527	1051.43	821.098	261.901	1018.71	1229.25	3555.45	1312.26		1089.47
Rps9	1111.17	606.773	680.805	544.268	384.68	618.959	590.082	824.649	662.552	837.819	717.579		689.03
Arl4a	455.71	138.055	110.204	62.9722	59.6629	81.8552	93.2831	121.575	79.9917	98.5	567.723		169.957
Cdh1	154.114	72.0012	117.885	115.478	110.045	72.848	73.9082	102.441	64.1368	264.949	107.381		114.108
Serhl	58.452	480.797	204.44	298.138	175.138	524.488	787.802	162.391	686.615	820.789	756.277		450.484
Nap1l1	25.1476	160.826	83.7384	17.4245	82.7905	51.5641	17.0051	85.8118	109.769	124.307	34.1961		72.0527
Coro2a	45.102	37.7392	75.5553	15.526	45.0917	39.5239	83.0146	136.927	23.2728	80.9584	16.611		54.4838
Gns	7.60237	58.7627	40.1764	145.343	112.157	94.1403	77.7834	106.35	67.9166	87.1348	187.547		89.5376
Cdr2	72.6958	103.834	37.9846	4.68643	36.6198	11.4574	76.1441	50.6672	95.3302	87.1525	34.1996		55.5247
Ap1ar	150.52	1078.53	593.054	7.63815	694.139	1509.26	794.352	1209.23	1101.85	327.271	385.683		713.775
Srsf7	452.645	201.322	525.794	0.25547	241.157	178.382	80.8764	144.014	178.309	220.98	137.513		214.659
Glrx3	240.428	109.563	66.9076	0.035691	246.191	131.023	188.548	227.343	336.311	552.32	506.336		236.819
Ifitm2	0	4107.01	173.461	540.542	64.489	1672.16	781.948	3240.56	1279.28	1164.57	22.8871		1186.08
Fzd9	0	311.224	722.096	104.763	300.548	512.552	346.181	307.41	328.773	552.938	86.3084		324.799
Insm1	19.7094	145.888	40.2731	0.037494	21.4344	57.6188	64.7901	74.1218	83.0235	42.9275	17.739		51.5967
Srpk2	69.6005	103.492	58.7904	0	34.4647	12.9378	92.704	34.3989	31.4712	81.5459	22.485		49.2628
Slc9a3r1	187.653	23.0846	55.5109	0	100.928	80.0809	127.843	129.415	26.0188	59.0417	174.745		87.6655
Neurod6	0	314.696	233.63	31.6912	144.014	633.053	218.619	300.464	326.825	562.751	2.22747		251.634
Eif3e	348.501	289.949	206.541	3.53632	130.399	185.598	0.287546	181.006	108.052	142.664	635.031		202.869
Agpat2	35.8826	230.13	22.7827	23.9222	49.2598	83.6435	128.373	28.5514	141.183	0	437.11		107.349
B3galt5	13.8213	41.1834	41.787	0	176.863	208.768	41.0341	73.9543	20.5633	111.904	45.5136		70.4901
Ier2	520.846	328.228	136.613	0	181.762	396.156	517.824	118.031	244.609	220.734	0		242.255
Lrrc59	29.7138	189.191	5.54108	0.043278	2.74154	151.252	30.9806	12.5693	92.3268	111.943	40.7438		60.6405
Slc39a2	2.97208	130.147	131.173	0.049273	1609.79	131.855	0.065121	219.204	37.7391	53.7784	0		210.616
Tmem65	44.0827	4.11733	7.02786	0	16.7667	24.2363	17.7935	2.75433	9.03702	35.1357	50.2483		19.2
Chst13	4.18133	0	52.0133	0	10.9473	11.5654	0	54.1982	27.7051	0	42.8806		18.4992	Averaged TPM>16, but less than 6 cells with TPM>16
Cryab	1873.13	0	0	0	0	0	0.178791	0.996427	0.292366	46.774	0		174.67
Calca	0	0	0	0	0	0	67.0329	0	0	0	488.407		50.4945
Efna5	211.963	0	0	0	4.05637	0	0.077508	10.3632	0	12.9772	30.0439		24.4982
Pkn3	0	0	2.33413	0.033001	0	10.0644	0	67.0025	0.715308	52.92	113.403		22.4066
Veph1	58.5381	1.32087	0	0	4.02598	0	0	0.0295	0.021602	5.28778	174.657		22.171
Robo2	0	6.7883	10.2041	0	0	0	19.6076	0.02134	6.20517	100.323	23.8893		15.1854	Averaged TPM <16
Grasp	0	0	0.338503	0	21.7019	0	11.7542	31.7004	19.4021	23.2343	0		9.83013
Psme1	63.4826	37.0546	0	0	0	0	0	0	0	0	0		9.13975
Bend4	7.17145	0.197601	0	0	14.6042	0	0	11.636	28.3776	0.383774	0		5.67006
Slc9a2	21.0029	0	0	0	0.935058	0	16.2677	0	2.4481	0	16.4723		5.19327
Cdyl2	0	0	0	0	0	0	0	0	0	44.7907	0		4.07189
Smoc2	0	0	0	0	0	0	0	0	0	31.2627	10.2387		3.77285
Hdac11	0	0	0	0	0	0	0	0	0	0	36.4836		3.31669
Bmp7	0	0	0	0	0	0	0	0	0	9.47404	26.946		3.31091
Rtn4r	4.20729	12.101	0	0	19.0773	0	0	0	0	0	0		3.21687
Bmp2	0	0	10.6173	0	0	0	0	0	0	0	15.4023		2.36542
Mslnl	0	0	0	0	0	0	0	0	0	17.8065	0		1.61877
Zfp503	5.13006	0	5.37808	0	0	0	0	0	0.164753	0.414915	0		1.00798
Tmem91	0	0	4.05274	0	0	1.65438	0	3.67118	0	1.0879	0		0.951473
Cacng2	0	2.10862	0	0	0	0	0	0	3.11495	3.44829	0.954447		0.875119
P2rx3	0	0	0	0	0	0	0.157735	0.16978	0	0	0		0.0297741
Bcl11b	0	0	0	0	0	0	0	0	0	0	0		0
Htr3a	0	0	0	0	0	0	0	0	0	0	0		0
Mfap4	0	0	0	0	0	0	0	0	0	0	0		0
Mfge8	0	0	0	0	0	0	0	0	0	0	0		0
Tmem176b	0	0	0	0	0	0	0	0	0	0	0		0
