# Supplementary material for: Dual expression of Atoh1 and Ikzf2 promotes transformation of adult cochlear supporting cells into outer hair cells
Source: eLife journal article supplement (doi:10.7554/elife.66547), 2021-09-03
Supplement: supp [file elife-66547-supp-v1.zip › elife_poa_e66547_Supplemental_file_6.xlsx]

## Sheet: P1 IHC and utricle HC genes
Gene category	Gene numbers	OHC_like_cells-1	OHC_like_cells-2	OHC_like_cells-3	OHC_like_cells-4	OHC_like_cells-5	OHC_like_cells-6	OHC_like_cells-7	OHC_like_cells-8	OHC_like_cells-9	OHC_like_cells-10	OHC_like_cells-11		Averaged TPM	Figure 6-figure supplement 6B
Pan-HC or OHC-enriched (reference)	Atoh1	642.19	7690.67	2440.55	1769.53	1353.48	5304.12	7578.21	4300.79	4874.23	1487.19	3310.85		3704.71
	Ikzf2	141.155	93.5485	143.2	71.2548	83.2559	167.819	843.669	174.719	52.3253	53.0929	20.501		167.685
	Myo6	118.846	55.7936	127.965	27.1663	141.029	143.49	182.844	162.71	252.764	333.95	387.189		175.795
	Myo7a	8.66944	199.626	125.81	697.13	136.879	367.768	188.99	80.26	247.879	156.625	146.538		214.198
	Ocm	0	1109	2822.81	0	12362.1	558.076	2.01592	889.891	639.355	0	10650		2639.39
	Slc26a5	14.2548	29.4274	7.02749	18.5554	22.6581	11.3292	8.43835	52.176	22.4825	7.06235	92.1531		25.9604
	Insm1	19.7094	145.888	40.2731	0.037494	21.4344	57.6188	64.7901	74.1218	83.0235	42.9275	17.739		51.5967
	Insm2	0	58.4664	38.5113	25.9519	42.3548	28.322	52.1597	6.41092	37.8282	0.355846	30.0813		29.1311
	St8sia3	0	18.0186	40.3671	0	51.1797	33.6746	30.8393	67.6132	5.68486	12.5701	12.8056		24.7957
Cochlear IHC-enriched	Slc17a8	0	0	0	0	0	0	0.054917	0	0	0	0		0.00499245
	Slc7a14	0	0	0	0	0	0	0.036714	0	0	0	0		0.00333764
	Cys1	0	0	0	0	0	0	0	0	0	0	0		0
	Brip1	0	0	0	0	0	0	0	0	0	0	0		0
	Nefl	0	0	0	0	0	0	0	0	0	0	0		0
	Tekt2	0	0	0	0	0	0	0	0	0	0	0		0
	Tm6sf1	0	0	0	0	0	0	0	0	0	0	0		0
	Kctd1	0	0	0	0	0	0	0	0	0	0	0		0
	Paqr9	0	0.018057	0	0	0	0	0	0	0	0	0		0.00164155
	Otof	0	0	0	0	0	0	0.191783	0	0	0	0		0.0174348
	Ly6h	0	0.167248	0	0.275701	0	0	0	0	0	0	0		0.0402681
	Dgkg	0	0.998534	0	0	0	0	0	0	0	0	0		0.0907758
	Pitpnm1	0	0	0	0	0	0	0	0	0	0	0.831818		0.0756198
	Wdr95	0	0.375721	0	0	0	0	0	0	0	0	0		0.0341565
	Fam149a	0.489783	0	0	0	0	0	0	0.016761	0	0	0		0.0460495
	Tln2	0.073946	0.209568	0	0	0	0	0	0	0	0	0		0.025774
	Cacna2d2	0	0	0	0	0	0	0	0	0	0	2.11825		0.192568
	Kcnab2	0	2.54113	0	0	0	0	0	0	0	0	0		0.231012
	Kcnip3	0	0	0	0	0	0	6.37991	0	0	0	0		0.579992
	Pgam2	0	0	0	0	0	0	0	0	0	4.77953	0		0.434503
	Fgf8	0	0	0	0	0	0	0	6.42866	0	0	0		0.584424
	Tbx2	0	5.07345	1.88007	0.658929	0	0	0	0	0	0.042195	0		0.695877
	Cnih2	0	0	8.89945	0	0	6.58099	0	0	5.6989	0	0		1.92539
	Dnm1	0.129875	0	6.84759	0	0	0	0	6.80762	0	3.72279	0.630391		1.64893
	Smad3	10.0662	0	0	0	0	0	0	0	0	0	0		0.915109
	Chst2	0	13.5446	0	0	0	0	0.07756	0	0	0	0		1.23837
	Spock1	20.684	0	0	0	0	0	0	0	0	0	0		1.88037
	Tspan17	3.3008	0	0	0	0	32.4573	0	0	0	0	0		3.25074
	Atp2a3	0	0	0	0	0	0	30.5815	0.019901	0	0	0		2.78195
	Gm14635	0	0	0	0	0	0	0	0	0	0	39.7836		3.61669
	Rprm	0	0	0.04723	0	0	0	0.027966	0	0	0	48.2472		4.39294
	Camk2b	0	0	0	0	0	0	0	3.12573	0.017266	0	40.7411		3.98946
	Kcnj13	64.389	0	0	0	0	0	0	0	0.021695	0	0		5.85552
	Trim45	2.00691	0	0.879439	0	10.5155	0	5.19314	0.530593	0	0	0		1.73869
	Mtus2	0.02643	0.07234	1.72217	0	0	0	0	0	7.7271	0	14.8733		2.22012
	Immp2l	0.989402	2.3098	0	0	0	0	0	0	0	0	35.5253		3.5295
	Col9a2	40.2376	0	16.6	0	0	0	0	0	0	0	0		5.16706
	Chrng	0	4.51813	0	0.044165	0	32.9378	0.029375	0.092567	0.049971	15.9025	0.059314		4.8758
	Ppfia4	0	0.429744	0	0	19.6092	0.467652	0.569983	1.71344	0	0	16.3439		3.55762
	Ccdc114	0	0.053138	0	0	15.4935	0.032879	0	0	14.928	0	22.7736		4.84374
	Phgdh	62.7096	0	0	0	0	0	0	0	0	0	36.0289		8.97622
	Sestd1	0.914024	19.6466	0.037337	0	5.1266	5.90586	0	8.73404	15.5579	8.71682	0		5.87629
	Polg	17.1837	0.398955	7.50259	0	8.7384	0	3.52331	7.52687	0.62658	0	3.69069		4.47192
	Cgn	11.4571	0	0	31.3972	11.0321	2.04653	0.031223	6.93737	2.44246	6.99701	50.2325		11.143
	Camk2n1	26.4895	1.43318	19.5192	2.54131	12.1342	3.82289	27.0963	26.9216	19.0606	9.54369	9.27458		14.3488
	Necab2	0.201779	0.035468	180.693	0	0.069895	0	0.082653	0	0.116864	27.8279	0		19.0025
	Espnl	0	0.198678	0.388617	6.47018	3.92447	0.294303	0.014948	0.345111	9.85869	15.8807	144.723		16.5544
	Kcp	0	1.16725	0	0	0	0	0.177057	0.018764	9.32013	0.156083	431.485		40.2113
	Mlf1	139.731	0	0	0	36.7283	0	0	0	0	0	404.058		52.7743
Utricle HC-enriched	Lrrc9	0	0	0	0	0	0	0	0	0	0	0		0
	Riiad1	0	0	0	0	0	0	0	0	0	0	0		0
	Iqca	0	0	0	0	0	0	0	0	0	0	0		0
	Rarb	0	0	0	0	0	0	0	0	0	0	0		0
	Kcnj2	0	0	0	0	0	0	0	0	0	0	0		0
	1700024G13Rik	0	0	0	0	0	0	0	0	0	0	0		0
	Fam171b	0	0	0	0	0	0	0	0	0	0	0		0
	Dnah9	0	0	0	0	0	0	0	0	0	0	0		0
	Dnah6	0	0	0	0	0	0	0	0	0	0	0		0
	Ccdc60	0.056604	0	0	0	0	0	0	0	0	0	0		0.00514582
	Nek10	0	0.026279	0	0	0	0.017857	0.185388	0	0	1.11712	9.88497		1.02106
	Wdr66	0	0	0	0	0	0.028838	48.9569	0	0	0	0		4.45325
	Cfap45	0	0	0	0	11.8686	0	0	0.026756	6.1616	0	0		1.64154
	Slc10a7	0	0	0	0	1.6699	0	17.8179	0	4.08632	0	0		2.1431
	Rsph10b	0	0	0	0	0	0	41.4146	0	5.83626	0	0		4.29553
	Fsip1	0	0	0	0	0	0	0	0	3.39519	1.28196	35.9477		3.69316
	Mllt11	7.17623	0	0	0	0	0	1.03036	29.1648	0	0	7.00504		4.03423
	Plch1	17.411	0	0	0	0	0	1.76653	0.013973	22.9592	0	0		3.83189
	Dlgap1	0	14.3985	0	0	0.430784	0	0	0	0	0	90.6409		9.5882
	Ptprm	0	22.8612	0.764486	1.21106	3.81867	0	0	0.017675	11.8382	0.006195	52.3911		8.44623
	Mapk10	0.055301	3.51898	39.5043	0.084604	0	0	0.021934	0.064673	34.1627	39.9	0		10.6648
	Cep41	97.8747	0	0	0	0	81.5004	0	0.236722	85.4912	18.8504	0		25.8139
	F730043M19Rik	2.04951	43.347	21.0087	0	25.2147	18.7494	0	14.3253	52.9939	56.367	33.2849		24.3037
	Cfap161	0	0.020975	41.867	0	228.419	14.564	114.805	33.9993	129.14	116.212	0		61.7297
	Nme9	0	101.973	94.498	0	109.851	314.334	13.2319	69.0993	172.308	267.571	0		103.897
	1700001L19Rik	96.9127	18.4704	46.8353	28.3566	140.265	18.0311	221.072	109.138	76.8547	43.9804	275.123		97.7308
