# Supplementary material for: Dual expression of Atoh1 and Ikzf2 promotes transformation of adult cochlear supporting cells into outer hair cells
Source: eLife journal article supplement (doi:10.7554/elife.66547), 2021-09-03
Supplement: supp [file elife-66547-supp-v1.zip › elife_poa_e66547_Supplemental_file_7.xlsx]

## Sheet: OHC-like cells over adult OHCs
Genes	baseMean	log2FoldChange	lfcSE	stat	pvalue	padj		Genes expressed in a higher level in OHC-like cells than in P30_WT OHCs
Atoh1	23504	11.9138	1.05138	11.3316	9.14878e-30	3.34022e-28
Cldn9	19824.3	2.28184	0.444152	5.13753	2.78377e-07	2.53102e-06
Dbi	18665.4	2.49694	0.579275	4.31045	1.62921e-05	0.000123361
Ckb	14510	3.29532	0.646108	5.10026	3.39188e-07	3.06136e-06
Id2	13821.3	4.6997	0.695287	6.75937	1.38593e-11	1.83222e-10
Tecr	13014.2	2.95755	0.589448	5.01749	5.23519e-07	4.60164e-06
Actg1	12933.2	2.20738	0.36739	6.00829	1.87486e-09	2.1138e-08
Odf3l2	12688.9	13.7409	1.00726	13.6419	2.25557e-42	1.45573e-40
Pdia3	11762.9	2.29357	0.508371	4.51161	6.43371e-06	5.07789e-05
Gsn	9873.55	26.8881	1.72884	15.5527	1.52561e-54	1.65625e-52
Krt8	9374.62	5.22963	1.25768	4.15815	3.20828e-05	0.000235528
Ldhb	9307.88	2.68593	0.672317	3.99504	6.4683e-05	0.000460621
Ly6e	8316.42	6.41223	1.52363	4.20851	2.57056e-05	0.000190503
Actb	8314.96	3.4038	0.467098	7.28713	3.16632e-13	4.69308e-12
Anxa4	7622.26	15.7788	0.896631	17.5979	2.55755e-69	5.66567e-67
Psph	7621.86	8.07749	1.33079	6.06969	1.28158e-09	1.46608e-08
Selenom	7607.29	7.95361	0.974022	8.16574	3.19471e-16	5.71734e-15
Cd24a	6107.61	4.94769	1.06633	4.63994	3.48508e-06	2.82407e-05
Atp6v1e1	6058.83	3.03727	0.533563	5.69243	1.25244e-08	1.29371e-07
Btg2	5837.64	3.81334	0.818754	4.65749	3.20095e-06	2.60025e-05
Zbtb20	5795.33	2.70477	0.626497	4.31729	1.57953e-05	0.000119821
Eef2	5679.37	2.11683	0.329345	6.42739	1.29813e-10	1.58571e-09
Apoc3	5339.55	30.932	1.61995	19.0944	2.8104e-81	1.00154e-78
Krt7	4768.57	13.7256	1.33913	10.2496	1.18793e-24	3.4045e-23
Nr1d1	4716.58	4.01879	0.937779	4.28544	1.82381e-05	0.000137461
Rplp0	4688.3	2.36197	0.440069	5.36726	7.99434e-08	7.70889e-07
Tubb4b	4582.83	2.43619	0.495494	4.91669	8.80219e-07	7.56155e-06
Ptma	4209.55	2.98919	0.508637	5.87687	4.18105e-09	4.55415e-08
Socs2	4181.93	4.23246	0.810442	5.22241	1.76608e-07	1.64777e-06
Fasn	4178.93	3.54101	0.914155	3.87353	0.000107269	0.000743852
Ppp1r17	4170.46	5.44058	1.36065	3.99852	6.37395e-05	0.000454397
Tpd52	4151.55	3.63346	0.762338	4.7662	1.87732e-06	1.56695e-05
Serinc2	4144.01	3.98405	0.688985	5.78249	7.36011e-09	7.7942e-08
Cnn3	4072.4	12.0994	0.778382	15.5443	1.73925e-54	1.87575e-52
Mdk	4058.32	6.62512	1.44091	4.59787	4.26826e-06	3.42484e-05
Dpp4	4018.28	5.92599	1.00451	5.89939	3.64845e-09	3.99793e-08
Tspan8	3984.61	12.6563	0.843081	15.0119	6.1323e-51	5.64758e-49
Cd9	3896.37	11.1509	1.03975	10.7245	7.80772e-27	2.47089e-25
Pde6d	3870.78	3.96592	0.731043	5.42501	5.79513e-08	5.675e-07
Fdft1	3731.89	3.32979	0.749458	4.44293	8.87418e-06	6.90761e-05
Cd164	3661.76	4.08188	0.930324	4.38759	1.14615e-05	8.80862e-05
Zfp36	3566.92	11.2858	0.894586	12.6156	1.73185e-36	8.62923e-35
Tmod1	3470.41	3.83571	0.902281	4.25113	2.12694e-05	0.00015921
Igll1	3454.18	30.6761	2.02834	15.1237	1.12929e-51	1.08897e-49
Ces1d	3440.33	28.8505	1.3976	20.6429	1.13074e-94	8.42554e-92
Gadd45b	3405.87	5.79969	1.4131	4.10423	4.05656e-05	0.000295552
Cfl1	3402.25	2.72214	0.530668	5.12965	2.90287e-07	2.63346e-06
Enho	3391.58	5.14988	1.2212	4.21708	2.47484e-05	0.000183741
Cyb5r3	3289.43	7.7127	0.73893	10.4377	1.66859e-25	4.99146e-24
Otog	3164.75	27.6003	1.47822	18.6712	8.48578e-78	2.57606e-75
Ier2	3152.2	4.34834	0.97901	4.44157	8.93046e-06	6.94812e-05
Ecel1	3148.04	30.8776	1.78779	17.2714	7.72437e-67	1.52561e-64
Ctsf	3118.29	3.19424	0.823823	3.87733	0.000105608	0.00073295
Tuba4a	3046.88	3.74873	0.859975	4.35911	1.30592e-05	9.97578e-05
Stx7	2952.88	3.51507	0.887383	3.96116	7.45851e-05	0.000527241
Bcam	2841.65	14.3921	0.828209	17.3774	1.22315e-67	2.47545e-65
Prkx	2830.68	3.23594	0.711876	4.54564	5.47677e-06	4.35195e-05
Psmc3	2822.45	2.22631	0.508199	4.38078	1.18256e-05	9.07999e-05
Cd63	2719.36	13.9304	0.88311	15.7742	4.68172e-56	5.85859e-54
Tcn2	2679.84	5.37495	1.0674	5.03554	4.76495e-07	4.20634e-06
Fgfr3	2600.85	4.53312	0.949618	4.77362	1.80942e-06	1.51104e-05
Akt1	2588.76	3.92463	0.976906	4.0174	5.88432e-05	0.000422152
Cldn3	2346.31	30.3251	1.14125	26.5718	1.43974e-155	2.36017e-151
Ankrd24	2287.29	3.58214	0.9047	3.95948	7.51132e-05	0.000530289
Id3	2273.78	4.3527	1.07272	4.05764	4.95708e-05	0.00035798
Wls	2271.01	12.1644	0.801149	15.1837	4.53365e-52	4.47712e-50
Rassf6	2255.4	12.5192	0.966995	12.9465	2.45942e-38	1.32623e-36
Bdh2	2251.93	11.9939	1.07753	11.1308	8.87864e-29	3.09676e-27
Dmpk	2213.01	7.8289	1.18631	6.59939	4.12844e-11	5.25446e-10
Tspo	2174.19	4.82467	0.901743	5.35038	8.77685e-08	8.4337e-07
Obscn	2161.9	15.2556	1.67562	9.10445	8.67013e-20	1.91034e-18
Ehd3	2139.62	13.4135	0.973165	13.7833	3.21094e-43	2.13971e-41
Irgm1	2106.55	5.80399	1.43228	4.05228	5.07212e-05	0.000365643
Fzd9	2060.27	29.7231	1.4497	20.5029	2.02762e-93	1.44516e-90
Kcnj16	2007.83	6.48773	1.57895	4.10889	3.97558e-05	0.000290038
Pfn1	1906.85	2.36976	0.532751	4.44816	8.66103e-06	6.75132e-05
Tnfrsf12a	1863.81	4.97799	1.0817	4.602	4.18444e-06	3.36088e-05
Clstn1	1862.26	2.3811	0.594991	4.0019	6.28349e-05	0.000448629
Mt1	1845.7	29.8262	2.66832	11.1779	5.23193e-29	1.84049e-27
Plxnb2	1826.3	13.6756	0.950189	14.3926	5.76293e-47	4.41457e-45
Id1	1809.88	7.03881	1.15154	6.11251	9.80746e-10	1.13141e-08
Psat1	1809.87	13.9706	0.79158	17.6491	1.03472e-69	2.38904e-67
S100a10	1782.7	13.1755	0.799995	16.4694	6.08305e-61	9.31957e-59
Pdia4	1770.77	4.80031	0.943737	5.08649	3.64743e-07	3.2745e-06
Mfng	1755.34	14.5414	1.04645	13.896	6.7014e-44	4.6158e-42
Cdh1	1735.92	13.9414	0.710627	19.6185	1.07444e-85	5.18037e-83
Mal	1723.24	8.03674	1.62704	4.93947	7.83354e-07	6.75514e-06
Cmtm7	1686.55	3.63448	0.856039	4.2457	2.17913e-05	0.00016267
Fmn1	1680.51	3.95939	1.00058	3.95711	7.58621e-05	0.000534885
Fam107a	1612.68	24.6734	1.55788	15.8378	1.70618e-56	2.1515e-54
Tspan12	1534.63	12.0053	0.873068	13.7507	5.04289e-43	3.33339e-41
Smarcd2	1509.98	5.46612	1.19558	4.57196	4.83189e-06	3.85634e-05
Dll3	1487.76	29.5812	1.36812	21.6218	1.12039e-103	1.3119e-100
Cdc25b	1464.89	5.29391	1.29937	4.07421	4.61711e-05	0.000334608
Mbnl2	1461.3	12.712	0.664545	19.1288	1.45373e-81	5.29579e-79
Epb41l4a	1457.43	14.9017	1.06857	13.9454	3.35628e-44	2.36135e-42
Prr15l	1444.61	3.58709	0.911333	3.93609	8.28182e-05	0.000582428
Pnpla2	1442.49	6.05229	1.04278	5.80399	6.47562e-09	6.90663e-08
Scn1b	1439.84	6.31831	1.66349	3.79824	0.00014573	0.000994567
Sec61a1	1439.32	3.06571	0.711619	4.30807	1.64682e-05	0.000124464
Hs3st1	1417.62	10.6459	1.24592	8.54454	1.29046e-17	2.53348e-16
Sox9	1414.28	26.9085	1.17261	22.9475	1.56063e-116	3.19793e-113
Egfl6	1381.46	23.9936	1.66177	14.4386	2.95784e-47	2.29801e-45
Alpl	1380.11	14.6684	1.22091	12.0143	2.98948e-33	1.27621e-31
Pqlc3	1361.2	26.6576	2.37065	11.2448	2.45517e-29	8.80691e-28
Ralgds	1354.15	5.00294	1.27542	3.92259	8.76026e-05	0.000613705
Nrcam	1345.26	3.96013	0.860133	4.60409	4.1428e-06	3.32906e-05
Cd82	1342.62	3.50712	0.917977	3.82049	0.000133186	0.000913139
Mpzl1	1327.13	11.0765	0.932231	11.8817	1.47352e-32	6.06921e-31
B2m	1297.59	9.24673	1.36478	6.77525	1.24187e-11	1.65243e-10
Eya2	1262.21	8.70871	1.51259	5.75749	8.53723e-09	8.9712e-08
Inpp5j	1258.16	14.1524	1.02375	13.8241	1.82499e-43	1.23115e-41
Syne2	1241.63	4.49556	0.843107	5.33214	9.70635e-08	9.28874e-07
Mycl	1235.95	13.1738	1.30741	10.0762	7.03702e-24	1.92906e-22
Rab3b	1231.22	7.92054	1.25502	6.31106	2.77129e-10	3.31846e-09
Itpk1	1229.94	4.92883	1.21762	4.04793	5.16719e-05	0.000372333
Kif19a	1221.52	4.97039	1.13807	4.36739	1.2574e-05	9.62757e-05
Grb14	1217.56	26.8341	1.18467	22.6512	1.35837e-113	2.4742e-110
Sh3bgrl3	1207.76	4.81741	0.789275	6.10358	1.03717e-09	1.19314e-08
Lgr5	1203.73	9.26066	1.46648	6.31487	2.7039e-10	3.24013e-09
Maea	1193.38	3.5312	0.903938	3.90646	9.36569e-05	0.000653326
Ecm1	1192.57	31.4752	1.94735	16.1631	9.18096e-59	1.2542e-56
Snx31	1188.26	29.506	2.46928	11.9493	6.54994e-33	2.76735e-31
Rps6ka1	1185.61	13.1046	0.853927	15.3463	3.74789e-53	3.8161e-51
Rnd1	1179.13	3.85645	0.96598	3.99227	6.54448e-05	0.000465641
Fgfr1	1178.78	9.23628	1.26358	7.30961	2.67917e-13	3.98545e-12
Nr4a1	1170.48	6.80101	1.63265	4.16564	3.10481e-05	0.000228442
Neurod6	1155.47	29.0982	1.4578	19.9604	1.21751e-88	6.8823e-86
Nipal2	1151	12.3748	0.820365	15.0845	2.04677e-51	1.9173e-49
Tns1	1118.91	25.3023	1.49175	16.9615	1.58267e-64	2.67471e-62
Ptgr1	1115.85	10.3498	2.60133	3.97865	6.93069e-05	0.000491414
Syt13	1109.87	13.4212	1.10401	12.1567	5.2835e-34	2.36001e-32
Lgals3	1109.27	23.5783	2.19449	10.7443	6.30358e-27	2.00261e-25
Scrn1	1106.46	7.89439	0.996161	7.92481	2.28493e-15	3.86952e-14
Ccdc50	1093.24	3.90134	0.933233	4.18045	2.9093e-05	0.000214732
Mpc1	1085.95	4.65207	0.515671	9.02139	1.85712e-19	4.03763e-18
Pantr1	1083.42	6.0087	1.25403	4.79153	1.65513e-06	1.38644e-05
Nsmf	1075.67	9.3562	1.34137	6.97508	3.05688e-12	4.28303e-11
Nrep	1075.47	29.7727	1.59539	18.6617	1.01531e-77	3.02618e-75
Serpine2	1068.24	17.1428	1.96254	8.73499	2.43677e-18	4.99325e-17
Igsf8	1049.54	4.92414	1.16175	4.23856	2.24955e-05	0.000167698
Tspan14	1040.73	12.8987	0.936691	13.7705	3.83676e-43	2.54639e-41
Itpr2	1037.56	11.9094	0.982768	12.1182	8.45494e-34	3.72585e-32
Paqr8	1037.14	10.6169	1.0473	10.1374	3.77104e-24	1.04777e-22
Cldn23	1028.53	7.45239	1.13792	6.54913	5.78744e-11	7.29235e-10
Cadps2	1028.33	30.344	1.96143	15.4703	5.50409e-54	5.8212e-52
Gfra4	1022.61	14.0418	1.03697	13.5412	8.93455e-42	5.61165e-40
Tmem171	1008.28	11.4019	1.15458	9.87537	5.32351e-23	1.38302e-21
Epha5	1006.63	10.8394	1.46531	7.39738	1.38902e-13	2.11226e-12
Pamr1	998.236	30.6128	2.38037	12.8606	7.50382e-38	3.96807e-36
Ptprf	990.996	4.45439	0.923909	4.82125	1.42663e-06	1.20364e-05
Sh3bgrl	984.689	10.7504	0.969504	11.0886	1.42541e-28	4.89867e-27
Tpm4	961.308	11.4662	1.13444	10.1074	5.1243e-24	1.41181e-22
Wwc1	954.313	4.81133	0.864197	5.56741	2.58558e-08	2.60034e-07
Ddr1	947.673	3.99922	0.903188	4.42789	9.51577e-06	7.38494e-05
Mal2	947.617	10.302	1.07266	9.60413	7.68062e-22	1.87923e-20
Clic1	937.782	10.8113	0.962637	11.231	2.873e-29	1.02608e-27
Slc9a3r1	932.742	12.0248	0.946646	12.7025	5.72477e-37	2.91448e-35
Pde4b	927.923	5.93135	0.933125	6.35644	2.06481e-10	2.49619e-09
Litaf	906.027	3.76816	0.985475	3.82369	0.000131467	0.000902111
Bspry	903.074	4.03831	1.0533	3.83398	0.000126089	0.000867746
Pisd	895.328	12.3701	0.906925	13.6396	2.32788e-42	1.49651e-40
Plpp2	879.467	26.8042	1.28279	20.8953	5.90895e-97	4.84327e-94
Por	876.42	4.53026	1.10076	4.11556	3.86246e-05	0.000282163
Mpzl2	871.013	24.0814	1.63224	14.7536	2.91803e-49	2.45309e-47
Cdkn1c	861.467	29.3892	1.62547	18.0804	4.54589e-73	1.14647e-70
Tmsb10	860.922	8.01219	0.666566	12.0201	2.78647e-33	1.19265e-31
Fgfr1op	849.233	3.8986	1.00047	3.89676	9.7487e-05	0.000678889
Cyb561	844.423	4.11921	1.0713	3.84507	0.000120519	0.000831157
Aldh3a2	843.48	10.1653	0.985342	10.3165	5.93348e-25	1.72767e-23
Gm28661	840.285	2.15325	0.559746	3.84684	0.000119651	0.000825524
Sgk3	836.68	11.6609	1.06599	10.939	7.50612e-28	2.4808e-26
Thrb	832.053	4.19106	0.933888	4.48776	7.19769e-06	5.65637e-05
Aldh1a3	830.438	9.34145	1.93933	4.81683	1.45856e-06	1.22932e-05
Creg1	823.549	4.80034	1.13301	4.23681	2.26715e-05	0.000168933
Zyx	818.46	25.1319	1.3383	18.779	1.12238e-78	3.47154e-76
Rhoc	815.776	11.2199	1.12146	10.0047	1.45283e-23	3.90429e-22
Lgals3bp	809.3	5.41707	1.41651	3.82423	0.000131179	0.000900508
Galm	808.039	9.39349	1.38019	6.80596	1.00376e-11	1.34764e-10
Wdyhv1	806.674	4.01097	1.03036	3.8928	9.90925e-05	0.000688899
Eif4g1	805.839	2.34645	0.586981	3.99749	6.40175e-05	0.000456079
Gadd45a	791.556	4.2109	1.05133	4.00532	6.19335e-05	0.000442772
Tmcc3	774.958	4.15051	0.840333	4.93912	7.84755e-07	6.76011e-06
Tmem221	772.685	18.3421	1.49428	12.2749	1.2361e-34	5.6287e-33
Dbp	769.31	3.70271	0.859137	4.30981	1.63398e-05	0.000123608
Rras2	768.501	25.2279	1.46726	17.1939	2.94935e-66	5.49417e-64
Thsd7b	766.282	29.219	1.23811	23.5997	3.87877e-123	1.27169e-119
Pcyt2	763.789	4.30051	1.09581	3.92449	8.6913e-05	0.000609134
Gng12	762.074	10.4542	0.964952	10.8339	2.37895e-27	7.70716e-26
Chil1	749.972	28.5293	1.6342	17.4576	3.01298e-68	6.33229e-66
Samd9l	748.531	27.1425	1.57535	17.2295	1.59446e-66	3.07506e-64
Fblim1	746.059	6.07858	1.4098	4.31165	1.62041e-05	0.000122808
Cmtm8	735.313	11.9303	0.628552	18.9806	2.46927e-80	8.43308e-78
Slc27a2	731.864	12.0845	0.999237	12.0937	1.14036e-33	4.98504e-32
Itpr3	726.278	13.7605	1.76929	7.77742	7.40163e-15	1.21822e-13
Iqgap1	724.913	9.67592	0.902763	10.7181	8.36827e-27	2.64318e-25
Car13	722.026	10.0219	0.947906	10.5726	3.99078e-26	1.22741e-24
Crlf1	721.819	29.6919	1.63486	18.1618	1.03615e-73	2.69612e-71
Pou3f3	716.066	4.47174	1.02489	4.36315	1.28201e-05	9.80225e-05
Rhou	714.092	10.8378	0.823986	13.1529	1.63717e-39	9.28653e-38
Cntn1	711.781	12.4592	1.22804	10.1456	3.46561e-24	9.66186e-23
Smim3	710.973	22.4614	1.89557	11.8494	2.1664e-32	8.87846e-31
Maged1	704.653	27.3344	1.42875	19.1317	1.37528e-81	5.12385e-79
Acss3	703.27	9.24217	1.15013	8.03577	9.29904e-16	1.60631e-14
Fosb	700.604	7.82642	1.09951	7.11811	1.09415e-12	1.56923e-11
Mcam	696.928	29.0919	1.17242	24.8135	6.40978e-136	5.25378e-132
Misp	692.193	26.3292	1.33234	19.7616	6.3744e-87	3.25723e-84
Isca1	688.574	4.01669	0.901709	4.45453	8.40781e-06	6.57269e-05
F11r	688.214	11.3276	1.08993	10.393	2.66863e-25	7.92517e-24
Neurl1b	684.942	13.3788	1.6675	8.02326	1.02977e-15	1.77508e-14
B930095G15Rik	683.115	5.92378	0.834444	7.09908	1.25593e-12	1.79185e-11
Ndc1	682.553	12.4151	1.4801	8.38798	4.94574e-17	9.31902e-16
Ndn	680.883	11.1023	1.19329	9.30393	1.35346e-20	3.12058e-19
Rem2	678.707	29.4921	1.4142	20.8543	1.39268e-96	1.08716e-93
Ncor2	677.904	3.30132	0.851836	3.87553	0.000106391	0.000738074
Cd83	677.752	9.40533	2.45384	3.8329	0.000126641	0.000871183
Matn1	669.248	19.7052	2.20628	8.93145	4.20464e-19	9.02182e-18
Hes1	664.26	10.7408	1.07672	9.97544	1.95243e-23	5.179e-22
Jpt1	659.532	12.0365	0.932523	12.9075	4.08392e-38	2.1807e-36
Nfia	658.601	2.84831	0.670484	4.24814	2.15549e-05	0.000161126
Gna14	657.292	25.9413	1.31159	19.7786	4.55232e-87	2.4073e-84
Lad1	653.609	25.9136	1.5054	17.2138	2.09101e-66	3.94e-64
Parva	647.573	9.96449	1.1727	8.49706	1.9446e-17	3.77699e-16
Luzp2	643.888	26.5133	1.86402	14.2237	6.53459e-46	4.8914e-44
Sod3	641.915	28.4539	2.7728	10.2618	1.04738e-24	3.00694e-23
Lrrc26	632.452	30.2313	1.5614	19.3617	1.62576e-83	6.50028e-81
Stard4	626.541	5.01192	1.06177	4.72033	2.35468e-06	1.93485e-05
Mark1	624.71	11.5025	0.921809	12.4782	9.82417e-36	4.75067e-34
Dip2b	622.423	7.0974	0.81881	8.66795	4.39952e-18	8.88195e-17
Sstr2	620.855	26.8463	1.85095	14.5041	1.14123e-47	8.99433e-46
Trim25	616.454	6.0122	1.22888	4.89241	9.96107e-07	8.51809e-06
Nt5dc2	614.587	6.85945	1.60675	4.26915	1.96217e-05	0.000147279
Avpi1	614.159	9.58972	1.52724	6.27911	3.40513e-10	4.06261e-09
Insig1	607.506	9.62759	0.819322	11.7507	7.00498e-32	2.80764e-30
Fermt2	605.033	9.34205	1.25285	7.45665	8.87491e-14	1.36223e-12
Upk3bl	602.766	17.1901	3.25101	5.28763	1.23911e-07	1.17279e-06
Ppdpf	602.733	4.97517	0.865546	5.74801	9.0299e-09	9.43449e-08
Rab27b	597.31	26.2546	1.67751	15.651	3.27262e-55	3.72555e-53
Sdc1	596.795	11.8262	1.49071	7.9333	2.13397e-15	3.62135e-14
Gm15459	595.738	3.67178	0.792135	4.63529	3.56429e-06	2.88683e-05
Nudt3	592.208	3.8856	0.719508	5.40036	6.65081e-08	6.46276e-07
Elovl5	588.338	11.8232	1.1616	10.1784	2.47708e-24	7.00116e-23
Gm16136	574.801	23.3494	1.5858	14.724	4.51852e-49	3.74102e-47
Ets2	570.36	10.191	1.39955	7.28162	3.29842e-13	4.87565e-12
Ppp1r3c	569.72	29.1801	1.53951	18.9541	4.08293e-80	1.36595e-77
Fabp5	567.582	6.22404	1.35828	4.58229	4.59922e-06	3.6796e-05
Gca	563.192	11.1128	0.916438	12.126	7.68851e-34	3.40643e-32
Pacsin3	561.471	24.0829	1.64223	14.6648	1.08348e-48	8.79283e-47
Gcat	560.759	5.46858	1.03228	5.29755	1.17365e-07	1.11469e-06
Kremen1	559.16	9.6987	1.1302	8.58142	9.37068e-18	1.85748e-16
Sin3b	559.122	4.72424	0.894866	5.27927	1.297e-07	1.22405e-06
Acvr1c	557.997	6.96507	1.52804	4.55816	5.16042e-06	4.11053e-05
Hk2	557.686	25.4873	1.52635	16.6982	1.34997e-62	2.19109e-60
Hbegf	551.967	9.32302	1.81466	5.1376	2.78263e-07	2.53102e-06
Hmgb2	541.807	8.26549	1.14707	7.20576	5.77215e-13	8.41841e-12
Pptc7	539.985	3.80794	0.916181	4.15632	3.23415e-05	0.000237321
Rasgrp1	538.262	20.9671	1.72502	12.1547	5.41605e-34	2.41264e-32
Hdc	535.324	24.341	2.26053	10.7678	4.88357e-27	1.56055e-25
Echdc2	529.921	11.9567	1.21532	9.83829	7.70063e-23	1.98485e-21
Galnt1	529.873	11.327	1.03145	10.9816	4.68351e-28	1.56687e-26
Gm8399	528.6	6.65704	1.01497	6.55883	5.42309e-11	6.84906e-10
Pacs1	526.607	10.2732	1.27769	8.04046	8.95004e-16	1.54766e-14
Pls3	526.001	7.92579	1.53961	5.14791	2.63409e-07	2.40829e-06
Pole3	525.988	4.30736	1.07347	4.01254	6.00693e-05	0.000430383
Tent5a	523.315	6.86179	1.63824	4.1885	2.808e-05	0.000207537
Fmnl1	520.202	28.1912	1.4394	19.5854	2.06e-85	9.38042e-83
Mapk11	517.597	27.8895	1.45666	19.1462	1.04202e-81	3.97252e-79
Coro2a	517.205	7.92666	1.44566	5.48307	4.18017e-08	4.14803e-07
Gm12715	514.541	2.50674	0.404684	6.19431	5.85423e-10	6.85489e-09
Zfp185	507.985	21.0085	1.59216	13.195	9.38017e-40	5.39541e-38
Septin9	505.927	11.4066	0.824364	13.8368	1.5282e-43	1.03519e-41
Epb41l4b	505.793	12.4751	0.959398	13.0031	1.17483e-38	6.44115e-37
Cxcl14	505.227	13.3187	1.50253	8.86417	7.70737e-19	1.62609e-17
Rhpn2	504.427	10.3117	1.50069	6.87127	6.36342e-12	8.6785e-11
Bhlhe40	500.147	25.2114	1.65127	15.2679	1.25175e-52	1.26667e-50
Perp	499.938	26.0999	1.3489	19.349	2.07646e-83	8.10461e-81
Phyh	495.946	27.7839	1.20114	23.1314	2.23987e-118	5.24544e-115
Lhx2	492.364	26.6622	2.63491	10.1189	4.55697e-24	1.25974e-22
Cep250	490.748	6.57873	1.16848	5.63018	1.80023e-08	1.83756e-07
Fbxo30	490.207	9.92515	1.19479	8.30704	9.81168e-17	1.81538e-15
Adgrl3	486.349	8.28433	0.812757	10.1929	2.13373e-24	6.05159e-23
Map3k1	485.102	11.4138	0.965547	11.8211	3.03704e-32	1.23846e-30
Tgfa	482.526	8.44139	1.47693	5.7155	1.09383e-08	1.13632e-07
Prkar2b	479.301	26.8316	1.46216	18.3507	3.26001e-75	9.05784e-73
Smoc1	476.898	34.4553	1.88307	18.2974	8.68179e-75	2.37201e-72
Dgkb	475.855	11.5957	1.21287	9.56057	1.17109e-21	2.83989e-20
Adgrg1	474.513	28.966	1.46588	19.7602	6.55697e-87	3.25723e-84
Erbin	473.558	9.14222	0.907723	10.0716	7.37707e-24	2.01554e-22
Rnf182	473.066	28.3868	1.17778	24.102	2.3823e-128	1.30177e-124
St3gal6	471.021	23.6995	1.42737	16.6036	6.56236e-62	1.02454e-59
Gulp1	470.923	26.8153	1.25244	21.4104	1.06867e-101	1.09492e-98
Sowaha	470.083	28.6908	1.27197	22.5562	1.16634e-112	1.73817e-109
Rasd1	469.151	8.07236	1.60752	5.02163	5.12347e-07	4.50827e-06
Irx3	468.532	9.27079	1.44433	6.41874	1.3741e-10	1.67476e-09
Exoc3	468.312	5.79624	1.03936	5.57672	2.45102e-08	2.46955e-07
Inka2	468.05	11.3774	1.36348	8.34438	7.15858e-17	1.33505e-15
Sfn	467.624	7.39186	1.56141	4.73411	2.20023e-06	1.81797e-05
Rtp4	467.433	24.1177	2.84164	8.48726	2.11574e-17	4.09485e-16
Tspan9	465.701	28.6802	1.41289	20.2991	1.31063e-91	8.59407e-89
Ppm1j	461.378	29.2678	1.89002	15.4854	4.35123e-54	4.6318e-52
Tfeb	459.768	8.79544	0.990628	8.87865	6.76796e-19	1.43343e-17
Flrt1	457.279	8.91451	1.40372	6.35064	2.14427e-10	2.58844e-09
Dmtn	453.581	25.8506	1.27555	20.2663	2.55377e-91	1.61015e-88
Kcnh7	448.672	28.8252	1.28173	22.4893	5.28388e-112	7.21822e-109
Dennd1b	448.053	10.7896	0.870031	12.4014	2.56658e-35	1.20211e-33
Creb3l4	444.19	21.3456	1.68641	12.6574	1.01756e-36	5.11681e-35
Prex1	443.253	5.54704	1.12506	4.93044	8.20456e-07	7.06023e-06
Ptprk	442.901	10.7244	0.959294	11.1795	5.13851e-29	1.81152e-27
1810019D21Rik	442.032	28.6306	1.35851	21.075	1.34857e-98	1.16353e-95
Otogl	441.172	26.2122	1.74761	14.9989	7.46566e-51	6.76158e-49
Slc31a2	436.641	27.0405	1.5902	17.0044	7.6173e-65	1.34269e-62
Zfp62	435.735	27.2124	1.46182	18.6154	2.41218e-77	7.06122e-75
Umodl1	427.9	13.5522	1.90809	7.10254	1.22486e-12	1.74906e-11
Cnksr1	424.662	6.71427	1.37182	4.89441	9.8601e-07	8.43615e-06
Ccsap	420.121	4.81754	1.06944	4.50471	6.6464e-06	5.23065e-05
Ctsz	419.551	6.70721	1.15105	5.82705	5.64154e-09	6.04248e-08
Arap2	417.77	27.5497	1.4152	19.467	2.09017e-84	8.78567e-82
Tmem159	417.274	27.9179	1.1637	23.9905	3.49018e-127	1.43036e-123
Mpped2	416.015	28.4522	1.73971	16.3546	4.03415e-60	5.80103e-58
Stx11	413.456	20.329	1.55034	13.1126	2.78984e-39	1.57703e-37
Crhr1	412.691	12.4729	1.22586	10.1749	2.5671e-24	7.23066e-23
Trim26	412.173	10.7964	1.23608	8.7344	2.44958e-18	5.01323e-17
Ccdc69	408.766	26.468	1.4966	17.6854	5.43186e-70	1.2905e-67
Cyb5r1	405.706	27.7819	1.46243	18.9971	1.80321e-80	6.28936e-78
Rhoj	402.541	17.4445	2.0175	8.6466	5.30573e-18	1.06459e-16
Chst8	402.459	27.3582	1.5637	17.4958	1.54247e-68	3.32706e-66
Sgpp2	402.3	8.56571	1.26682	6.76161	1.36468e-11	1.80559e-10
Wee1	401.946	26.401	1.87823	14.0563	7.04552e-45	5.04354e-43
Hgs	400.6	5.00605	1.08073	4.6321	3.6198e-06	2.9289e-05
Lvrn	397.355	28.662	2.06369	13.8887	7.41821e-44	5.08814e-42
Gal	396.993	27.1317	2.07773	13.0583	5.69505e-39	3.17548e-37
Apoa4	396.691	12.0061	1.20801	9.93873	2.82402e-23	7.43084e-22
Tlcd1	396.568	27.9063	1.2622	22.1093	2.57389e-108	3.24567e-105
Ndrg1	396.452	23.3376	1.87687	12.4344	1.70081e-35	8.10504e-34
Gpr37	395.484	25.5349	1.68783	15.1288	1.04525e-51	1.01389e-49
Psmd10	394.616	6.58334	1.17633	5.5965	2.18725e-08	2.21467e-07
Elf1	394.056	7.99994	0.900208	8.88677	6.29107e-19	1.33761e-17
Slc1a3	392.969	26.5115	2.4362	10.8824	1.39907e-27	4.57784e-26
Egr2	392.37	24.9716	1.70021	14.6874	7.76853e-49	6.36747e-47
Gstk1	392.073	9.6732	1.20171	8.04951	8.31264e-16	1.442e-14
Irx5	390.849	10.1144	1.08575	9.31558	1.21287e-20	2.80431e-19
Slitrk6	390.776	10.8538	1.4314	7.58269	3.38469e-14	5.32488e-13
Cacna1b	390.353	13.2187	1.5282	8.64989	5.15481e-18	1.03685e-16
Hivep2	389.705	7.42589	1.08038	6.8734	6.26878e-12	8.55654e-11
Ntn4	388.95	18.966	1.72441	10.9985	3.88421e-28	1.30479e-26
Siah2	386.139	4.98307	1.23385	4.03863	5.37646e-05	0.000386733
Dennd2d	382.243	22.0687	1.63885	13.466	2.48021e-41	1.5285e-39
Cobll1	380.46	26.8762	1.25987	21.3325	5.66844e-101	5.46605e-98
Gipc2	379.524	11.0198	1.17462	9.38164	6.49518e-21	1.52763e-19
Slc39a8	377.785	10.015	1.31513	7.61523	2.63227e-14	4.1732e-13
Esrp1	377.025	12.3413	1.11959	11.0231	2.95785e-28	9.97697e-27
Cd151	375.598	5.16463	0.994753	5.19187	2.08193e-07	1.9206e-06
Tbc1d8	373.235	4.75655	1.15684	4.11167	3.92809e-05	0.000286702
Cck	371.636	30.2569	1.90324	15.8975	6.59106e-57	8.64378e-55
Plp2	371.11	25.3224	1.58035	16.0233	8.77986e-58	1.17974e-55
Tmem129	369.098	27.8648	1.37684	20.2382	4.51178e-91	2.73932e-88
Bmp6	368.871	25.1925	1.53608	16.4005	1.89778e-60	2.80273e-58
Cblc	368.707	9.98172	1.41089	7.07478	1.49684e-12	2.12632e-11
Plekha1	368.47	11.1417	1.21132	9.19794	3.64885e-20	8.20517e-19
Kctd17	367.835	5.72298	1.40577	4.07105	4.6801e-05	0.000338873
Pdlim2	367.041	7.30938	1.645	4.4434	8.85489e-06	6.89588e-05
Hey1	366.064	23.8832	1.84549	12.9414	2.62685e-38	1.41187e-36
Cntnap2	365.919	27.8159	1.63843	16.9772	1.21201e-64	2.09141e-62
Prkch	362.841	9.95577	1.97384	5.04385	4.56255e-07	4.03855e-06
Ank2	362.419	8.87633	1.43872	6.16961	6.84598e-10	7.97061e-09
Ireb2	361.753	5.81696	1.2998	4.47528	7.63114e-06	5.97979e-05
Slc25a51	359.533	4.97599	1.08018	4.60661	4.09285e-06	3.29215e-05
Cpxm2	359.151	22.9356	2.18311	10.5059	8.11497e-26	2.4544e-24
1700001L19Rik	357.654	8.13171	1.24505	6.53125	6.52252e-11	8.17459e-10
Snx9	355.347	9.58523	1.16679	8.21502	2.12128e-16	3.8382e-15
Shc4	354.221	7.04913	1.50103	4.69618	2.65067e-06	2.16613e-05
Aldoc	350.877	10.0341	1.54767	6.48338	8.969e-11	1.11049e-09
Cyp2j12	349.263	28.1861	1.56386	18.0235	1.27522e-72	3.16738e-70
Tent5c	348.401	5.55824	1.37456	4.04366	5.2623e-05	0.000378853
Tpd52l1	347.675	26.8933	1.47648	18.2144	3.96415e-74	1.06532e-71
Boc	347.349	12.0025	1.48702	8.07148	6.94495e-16	1.21374e-14
Wwtr1	347.226	9.16893	1.31963	6.94811	3.70213e-12	5.1475e-11
Sting1	347.156	14.2845	1.79547	7.95586	1.77896e-15	3.02515e-14
Plekha6	346.457	28.6447	1.62225	17.6574	8.93327e-70	2.09204e-67
Fam174b	346.017	19.051	2.02477	9.40896	5.01085e-21	1.18875e-19
Dsp	345.855	24.6271	2.20486	11.1694	5.75408e-29	2.01984e-27
Prom2	343.973	24.0658	1.58227	15.2096	3.05216e-52	3.05086e-50
Blmh	342.107	8.18561	1.26894	6.45077	1.11285e-10	1.36447e-09
Ece1	341.942	12.0766	1.16273	10.3864	2.85813e-25	8.47257e-24
Mcm2	341.568	28.4872	1.70652	16.6931	1.47104e-62	2.36419e-60
Stxbp6	340.443	24.3149	1.61564	15.0497	3.46849e-51	3.23062e-49
Sprr1a	338.926	21.9976	3.20254	6.86881	6.47394e-12	8.82189e-11
Sacs	338.139	28.6774	1.68764	16.9926	9.32403e-65	1.62605e-62
Grhl1	337.176	8.85309	1.53866	5.75377	8.72733e-09	9.14167e-08
Cldn6	336.871	9.46244	1.94634	4.86167	1.16401e-06	9.89714e-06
Man1c1	336.269	12.5408	1.43477	8.74067	2.31739e-18	4.75457e-17
Gpt2	335.679	28.2951	1.60495	17.6299	1.45207e-69	3.28756e-67
Adgrl2	335.445	25.5322	1.44827	17.6294	1.46399e-69	3.28756e-67
Tmem189	335.167	24.7954	1.48603	16.6857	1.66678e-62	2.65278e-60
Acadl	333.424	24.9336	1.70766	14.601	2.76741e-48	2.22383e-46
Eva1a	333.292	23.0455	1.76638	13.0468	6.63136e-39	3.68501e-37
Arl6	332.98	10.2285	1.32076	7.7444	9.6031e-15	1.56174e-13
Gm35853	332.182	29.1235	1.70894	17.0418	4.02107e-65	7.16493e-63
Gm44239	331.649	22.2008	4.22365	5.2563	1.4698e-07	1.38315e-06
Ppp2r2b	329.955	17.1984	2.0362	8.44632	3.00617e-17	5.74362e-16
Stimate	328.169	25.5494	1.46222	17.473	2.29971e-68	4.89598e-66
Shc2	327.942	27.8691	1.4317	19.4657	2.14607e-84	8.79512e-82
C2cd4b	327.834	10.1262	1.24833	8.1118	4.9875e-16	8.80087e-15
Cbfa2t3	327.723	12.2044	0.793962	15.3715	2.54235e-53	2.63776e-51
Cadm1	326.856	24.8973	1.70951	14.564	4.75729e-48	3.76745e-46
Kcnb2	326.164	26.297	1.81373	14.4989	1.2318e-47	9.66167e-46
Egfr	325.959	24.9095	1.50849	16.5129	2.96313e-61	4.58251e-59
Fam234a	322.263	6.48713	1.47294	4.4042	1.06173e-05	8.19441e-05
Rasa4	322.018	28.5198	2.02106	14.1113	3.2354e-45	2.34681e-43
Nckap5	321.156	12.1037	1.38952	8.71075	3.01861e-18	6.14709e-17
Snx7	319.595	26.5827	1.29688	20.4974	2.26941e-93	1.5501e-90
Lctl	319.37	12.8278	2.22246	5.77188	7.83923e-09	8.26953e-08
Igfbp2	318.746	12.1196	2.44468	4.95757	7.13818e-07	6.20118e-06
Slc2a10	318.449	25.6238	1.89987	13.4871	1.86259e-41	1.15657e-39
Mxra8	317.44	28.2606	1.9095	14.8	1.4655e-49	1.25125e-47
Galk2	316.683	28.1252	1.49707	18.7868	9.69265e-79	3.05561e-76
Amer2	316.236	10.7164	1.64269	6.52368	6.86029e-11	8.5717e-10
Clip1	315.986	6.71557	1.3908	4.82856	1.37522e-06	1.16087e-05
Ebf2	315.419	27.9346	2.14362	13.0315	8.09705e-39	4.46919e-37
Blnk	314.869	28.3456	1.88933	15.003	7.015e-51	6.38871e-49
Nedd9	312.151	7.75048	1.29734	5.97415	2.3129e-09	2.58455e-08
Tapbpl	311.2	10.3314	1.32518	7.79617	6.3815e-15	1.05349e-13
Memo1	311.007	5.88315	1.29637	4.53818	5.67414e-06	4.50224e-05
Gm47163	309.167	28.2949	1.74503	16.2145	3.97996e-59	5.5291e-57
Tmem43	308.709	26.0547	1.76392	14.7709	2.25588e-49	1.90622e-47
Car11	308.577	11.2454	1.40994	7.97579	1.51409e-15	2.58277e-14
Itih5	305.519	27.0262	1.85567	14.5641	4.74968e-48	3.76745e-46
Slc43a1	302.872	29.4662	2.22012	13.2723	3.35138e-40	1.96212e-38
Cfap161	302.828	13.2203	1.55516	8.50091	1.88114e-17	3.65807e-16
Sox10	302.314	18.8938	1.84035	10.2665	9.98081e-25	2.87549e-23
Tmem252	302.038	24.8708	1.51115	16.4581	7.33352e-61	1.11313e-58
Ppp1r14b	301.261	3.15972	0.825258	3.82876	0.000128789	0.000884843
Map4k5	300.76	4.65849	1.09493	4.25459	2.09431e-05	0.000156911
Gprc5c	299.436	9.40808	1.19078	7.90079	2.77144e-15	4.66451e-14
Slc6a11	298.958	7.88378	1.62739	4.84443	1.26973e-06	1.0757e-05
Edem1	298.954	5.31271	1.3808	3.84756	0.000119298	0.000823431
Dapk1	298.122	24.1316	1.59694	15.1112	1.36658e-51	1.30246e-49
Hpn	297.749	28.2569	1.79242	15.7646	5.44886e-56	6.71603e-54
Rnf130	297.739	4.43351	1.1611	3.81838	0.000134329	0.00091944
Syn2	297.477	12.3378	1.89557	6.50875	7.57792e-11	9.43958e-10
Fam222b	296.7	8.94198	0.962315	9.29216	1.51194e-20	3.47132e-19
Etv5	293.541	10.3338	1.71787	6.01551	1.79324e-09	2.02456e-08
Fgf11	291.48	12.4957	1.74849	7.14658	8.89667e-13	1.28383e-11
Rbms1	290.182	8.12591	1.14358	7.10565	1.19759e-12	1.71251e-11
Phlda1	288.18	3.63115	0.862099	4.21198	2.53136e-05	0.000187853
Rab13	287.916	5.90642	1.50996	3.91164	9.16711e-05	0.000640019
Prag1	287.591	25.9145	1.45909	17.7607	1.4233e-70	3.48241e-68
Rims2	287.409	11.6607	1.52403	7.65121	1.99096e-14	3.17181e-13
Resf1	287.342	6.17433	1.01986	6.0541	1.41205e-09	1.60636e-08
F3	287.209	46.5577	2.20304	21.1334	3.92132e-99	3.57123e-96
Zswim7	285.074	5.29221	0.906133	5.84044	5.2064e-09	5.61134e-08
Trak2	284.993	9.10165	1.31261	6.93404	4.09001e-12	5.66759e-11
Dhrs11	284.502	27.2662	1.36905	19.9161	2.94881e-88	1.61133e-85
Itga6	284.245	16.5337	2.60499	6.34691	2.19686e-10	2.64997e-09
Traf4	284.115	26.6322	1.57994	16.8565	9.40645e-64	1.55758e-61
Ubxn11	283.791	27.933	1.70811	16.3531	4.13108e-60	5.88877e-58
Nup62	283.531	27.0462	1.38294	19.5571	3.59126e-85	1.59112e-82
P2rx3	282.626	17.9769	2.87401	6.255	3.97515e-10	4.71184e-09
Tmem51	282.311	10.2194	1.4312	7.14044	9.303e-13	1.34011e-11
Adcy2	280.564	10.4969	1.33976	7.83489	4.69238e-15	7.78565e-14
Ppp2r5a	278.782	6.18697	1.28462	4.8162	1.46318e-06	1.23194e-05
Elovl7	277.88	26.2086	1.70152	15.4031	1.56121e-53	1.64057e-51
Ebf3	277.856	11.6072	1.02519	11.3221	1.02035e-29	3.71703e-28
Sall2	277.21	25.7777	1.89864	13.5769	5.49221e-42	3.46284e-40
Metrnl	277.163	26.1436	2.48908	10.5033	8.34096e-26	2.51348e-24
Pvr	276.082	25.5589	1.69136	15.1115	1.36038e-51	1.30246e-49
Irf2bpl	274.01	5.89698	1.50568	3.9165	8.98452e-05	0.000628342
Lmcd1	272.869	26.5121	1.69595	15.6327	4.36222e-55	4.93172e-53
Amot	271.013	11.29	1.45427	7.76335	8.27162e-15	1.35732e-13
Gm4735	270.45	3.85461	0.760647	5.06754	4.02992e-07	3.60013e-06
Marcks	269.374	24.1843	2.23162	10.8371	2.29606e-27	7.45334e-26
BC064078	269.15	26.6978	1.69838	15.7195	1.11168e-55	1.33998e-53
Scn4a	267.605	12.8542	1.77912	7.22505	5.00915e-13	7.31862e-12
Nxt2	267.318	7.0594	1.45923	4.83775	1.31315e-06	1.11075e-05
Lpar3	265.504	22.5148	1.64981	13.6469	2.10639e-42	1.36483e-40
BC006965	265.312	22.8497	1.83896	12.4253	1.90465e-35	9.02399e-34
Sgpl1	265.08	24.9834	1.96552	12.7108	5.15022e-37	2.63836e-35
Rhbdl2	264.462	25.5802	1.81747	14.0746	5.43992e-45	3.91126e-43
Tprn	263.931	10.5683	1.54763	6.82875	8.56597e-12	1.15955e-10
Nrip3	263.244	8.78928	1.90031	4.62517	3.74288e-06	3.024e-05
Gm7993	262.852	10.9632	0.954054	11.4911	1.46201e-30	5.49694e-29
S100a11	261.703	7.02698	1.83892	3.82125	0.000132776	0.000910713
Creb5	260.52	25.5148	1.88584	13.5297	1.04486e-41	6.5127e-40
Bche	260.515	24.1859	1.83038	13.2136	7.32681e-40	4.22917e-38
Dsg2	260.37	9.45024	1.61932	5.83595	5.34853e-09	5.74941e-08
Akr1cl	258.963	23.3181	1.53977	15.1439	8.31066e-52	8.10932e-50
Ephb1	258.947	22.3613	1.96931	11.3549	7.01354e-30	2.57787e-28
Vangl1	258.867	26.4974	1.70904	15.5043	3.24629e-54	3.4782e-52
Clmn	258.515	22.388	2.17397	10.2982	7.17795e-25	2.08632e-23
Gm13373	257.847	27.1615	2.25085	12.0672	1.57371e-33	6.84292e-32
Mapkapk3	256.968	26.273	1.78835	14.6912	7.33528e-49	6.04257e-47
Rgs6	255.466	9.48336	1.30363	7.27457	3.47513e-13	5.1184e-12
Lurap1	254.64	4.8138	1.06827	4.50617	6.60089e-06	5.20097e-05
Pdlim4	254.522	28.1431	2.05665	13.684	1.26566e-42	8.23334e-41
Aox2	253.634	18.6743	1.68733	11.0674	1.80592e-28	6.16759e-27
F730043M19Rik	253.579	27.1664	1.85808	14.6207	2.07288e-48	1.67392e-46
Tuba1c	250.536	4.08986	0.521214	7.8468	4.26779e-15	7.10273e-14
Kcnh3	249.636	28.8461	2.76961	10.4152	2.1132e-25	6.28706e-24
Mtap	249.585	25.6214	1.68326	15.2213	2.55487e-52	2.56944e-50
Utp14b	249.092	7.916	1.22166	6.47971	9.18982e-11	1.13697e-09
Ifitm2	248.896	12.2817	1.04311	11.7741	5.30616e-32	2.14775e-30
Mgat2	248.236	25.9272	1.51396	17.1253	9.6035e-66	1.74922e-63
Pmepa1	248.095	12.0169	1.30795	9.18755	4.01875e-20	8.99992e-19
Syt11	247.987	9.81965	1.85812	5.28472	1.25897e-07	1.19021e-06
Arid5a	247.42	9.75531	1.55245	6.2838	3.3039e-10	3.94471e-09
Cib3	247.069	27.6179	2.2058	12.5206	5.76208e-36	2.82808e-34
Fut2	246.715	21.5638	1.81117	11.906	1.10084e-32	4.56862e-31
Tmprss2	245.654	16.1206	1.76752	9.12044	7.48168e-20	1.66189e-18
Bcl3	245.458	24.3107	2.28728	10.6286	2.19289e-26	6.82125e-25
Krt80	244.953	29.6452	1.57026	18.8792	1.69082e-79	5.43483e-77
Rgs2	244.842	24.6586	1.83169	13.4622	2.60908e-41	1.6019e-39
Spout1	244.188	5.70133	1.27727	4.46368	8.05639e-06	6.30398e-05
Trib1	244.089	25.3464	1.48069	17.1179	1.09071e-65	1.96483e-63
Krt33b	243.788	27.4493	2.69192	10.197	2.04589e-24	5.82261e-23
Gm11223	243.072	4.07414	0.975184	4.17781	2.94325e-05	0.000217043
Tes	242.927	25.5746	1.59401	16.0442	6.27571e-58	8.50229e-56
Shroom1	242.848	23.5356	1.76531	13.3322	1.50327e-40	8.92337e-39
B4galnt1	242.031	33.8809	1.50144	22.5656	9.43435e-113	1.54657e-109
Apod	241.49	22.8558	2.03021	11.2579	2.11792e-29	7.63057e-28
Gm19345	240.74	5.55765	1.45925	3.80858	0.000139768	0.000955072
Gpr68	239.212	30.1101	2.11462	14.239	5.24816e-46	3.96466e-44
Tex33	237.073	28.4899	2.02349	14.0796	5.06999e-45	3.66134e-43
Ulk1	236.356	9.8506	1.29992	7.57785	3.51325e-14	5.52183e-13
Smim5	235.505	27.4733	1.69155	16.2415	2.56546e-59	3.5945e-57
Mavs	235.278	10.7138	1.62498	6.59319	4.30487e-11	5.47052e-10
Agfg2	234.872	10.2758	1.07451	9.56321	1.1416e-21	2.77661e-20
Crim1	234.8	10.9547	1.12108	9.77157	1.49119e-22	3.77908e-21
Gfod2	234.308	6.35944	1.36331	4.66472	3.09036e-06	2.51415e-05
Rusc2	233.812	6.34627	1.42549	4.45201	8.50716e-06	6.64401e-05
Abca3	233.455	7.41446	1.45265	5.1041	3.32378e-07	3.00534e-06
Zfp467	233.41	24.5396	1.84049	13.3332	1.48382e-40	8.87303e-39
Vstm4	231.974	14.5474	2.70262	5.38269	7.33805e-08	7.10529e-07
Dhrs3	231.868	14.5043	2.18708	6.63182	3.31582e-11	4.25323e-10
Sh3bp5	231.709	10.8881	1.54312	7.05591	1.71472e-12	2.42951e-11
Rasef	231.3	9.49126	1.48866	6.3757	1.82133e-10	2.20837e-09
Cavin3	230.974	22.1288	1.71825	12.8786	5.93785e-38	3.15013e-36
Cyp2j6	229.834	24.4068	1.77701	13.7348	6.28578e-43	4.12171e-41
Bzw2	229.828	10.506	1.2882	8.15557	3.47538e-16	6.20609e-15
Jpt2	227.784	26.2446	1.68125	15.6101	6.21081e-55	6.92611e-53
Kif1a	227.101	28.1059	1.58544	17.7275	2.57065e-70	6.19717e-68
Sox2	226.094	8.68109	1.28058	6.77901	1.21e-11	1.61133e-10
Sppl2a	224.967	25.7151	1.46919	17.5029	1.36069e-68	2.97411e-66
Pitpnc1	224.377	23.2199	1.4761	15.7306	9.33407e-56	1.13343e-53
Plod2	224.263	24.7197	1.56951	15.7499	6.87583e-56	8.41161e-54
Bcl6	223.781	18.9038	1.74902	10.8083	3.14565e-27	1.01111e-25
Mir99ahg	222.345	9.26281	1.17303	7.89646	2.86931e-15	4.82426e-14
Ezh2	221.942	9.39148	1.58711	5.91735	3.27178e-09	3.61173e-08
Begain	220.24	12.1868	1.49067	8.17535	2.94999e-16	5.29673e-15
Sqor	219.097	26.4292	1.94397	13.5955	4.25885e-42	2.70602e-40
Dyrk3	217.301	9.80821	1.80948	5.42045	5.94488e-08	5.81124e-07
Itgb8	216.956	25.7243	1.71394	15.0088	6.42881e-51	5.88757e-49
Cemip	215.389	8.86686	1.4724	6.02206	1.72209e-09	1.94691e-08
Alg13	215.181	27.9256	1.83739	15.1986	3.61511e-52	3.59167e-50
Ppl	215.092	7.66158	1.54361	4.96341	6.92665e-07	6.027e-06
Pik3ap1	214.997	27.7016	1.75686	15.7677	5.18966e-56	6.44501e-54
Abhd17c	214.952	25.7347	1.65435	15.5557	1.45497e-54	1.59009e-52
Sapcd2	214.943	23.56	2.33938	10.0711	7.41807e-24	2.02337e-22
Agpat4	214.713	12.4361	2.10278	5.91412	3.3365e-09	3.67575e-08
Ppp4r1l-ps	214.558	5.36973	1.31912	4.07068	4.68765e-05	0.00033927
Ogfr	214.15	25.8894	1.66367	15.5616	1.32702e-54	1.46986e-52
Septin8	212.666	5.56575	1.40807	3.95274	7.72616e-05	0.000544284
Pof1b	212.248	22.8194	1.98323	11.5062	1.22785e-30	4.63783e-29
Arhgef38	211.514	23.3456	1.78459	13.0818	4.186e-39	2.35004e-37
Klhl32	211.503	11.0206	1.7075	6.45425	1.08756e-10	1.33446e-09
Sowahb	210.833	26.8624	1.63296	16.4502	8.36554e-61	1.25813e-58
Mcc	210.12	7.04219	1.30972	5.37686	7.57942e-08	7.32171e-07
Fam83g	210.006	10.7601	1.44474	7.44777	9.4929e-14	1.45437e-12
Wnt10a	209.074	28.1596	2.40473	11.7101	1.13141e-31	4.49085e-30
4930452B06Rik	208.745	30.6158	1.77296	17.2682	8.15906e-67	1.59228e-64
Fbn2	207.405	24.4528	2.11011	11.5884	4.71803e-31	1.83277e-29
Git1	207.343	10.6933	1.81644	5.88698	3.93323e-09	4.29278e-08
Mapk10	207.205	12.2857	1.53052	8.02718	9.97384e-16	1.72106e-14
Tfpt	207.173	4.97338	1.24197	4.00443	6.2167e-05	0.000444247
Ttc7b	207.117	5.39898	1.34272	4.02093	5.79695e-05	0.000416066
Parp3	206.907	10.0878	2.12485	4.74755	2.05895e-06	1.70898e-05
Fscn1	206.548	8.2509	1.38135	5.97308	2.32816e-09	2.59983e-08
Tmem186	206.381	26.5464	1.54187	17.217	1.98087e-66	3.77586e-64
Dmd	206.363	25.2561	1.54153	16.3838	2.49488e-60	3.65165e-58
Tnfaip2	206.331	27.7333	1.76587	15.7052	1.39421e-55	1.64427e-53
Cldn4	204.881	24.7067	2.14546	11.5158	1.09775e-30	4.16559e-29
Gm49329	204.176	8.369	1.2318	6.79414	1.08957e-11	1.45926e-10
Baiap2	203.127	9.17634	1.56164	5.87608	4.20095e-09	4.57279e-08
Hmgn3	203.006	28.1714	1.64058	17.1717	4.32909e-66	7.97379e-64
Gm8730	202.937	3.74266	0.816498	4.58379	4.56623e-06	3.65499e-05
Klf4	202.157	22.9048	1.61277	14.2022	8.88383e-46	6.58971e-44
Vegfa	201.046	26.8915	1.72847	15.5579	1.40616e-54	1.54705e-52
Mettl27	200.896	26.2172	1.94526	13.4775	2.12212e-41	1.31275e-39
Sult2b1	200.403	10.568	1.8353	5.7582	8.5018e-09	8.93971e-08
Tulp3	199.669	8.58194	1.37442	6.24407	4.26338e-10	5.02803e-09
Nsmce3	199.563	25.7912	1.29137	19.972	9.65818e-89	5.65452e-86
Scarb1	199.502	13.1461	1.59672	8.23319	1.82295e-16	3.3204e-15
Zfp931	198.993	25.6172	1.66815	15.3566	3.19799e-53	3.29715e-51
Cyp39a1	197.666	9.97934	1.52607	6.53923	6.18355e-11	7.77353e-10
Tcf12	197.527	5.38857	1.31678	4.09222	4.2727e-05	0.000310472
Cdk6	196.933	22.0565	1.79195	12.3086	8.14069e-35	3.73811e-33
Zfp395	196.47	11.2894	1.1074	10.1944	2.09958e-24	5.96506e-23
Foxp4	196.007	10.0402	1.23375	8.13793	4.02095e-16	7.14918e-15
Prox1	195.73	10.3807	1.56413	6.63671	3.20756e-11	4.12728e-10
Cdo1	194.586	27.3813	2.24376	12.2033	2.98429e-34	1.3477e-32
Fam114a1	194.355	24.9837	1.95411	12.7852	1.98298e-37	1.03856e-35
Acot9	193.713	24.6421	1.99435	12.356	4.5235e-35	2.10664e-33
Trip6	193.659	19.8458	2.1803	9.10229	8.84441e-20	1.94352e-18
Casp8	193.639	26.3086	1.45095	18.132	1.78261e-73	4.56599e-71
Lpcat1	193.299	9.58981	1.37584	6.97015	3.16595e-12	4.42828e-11
Myc	193.203	25.823	2.23604	11.5486	7.50655e-31	2.88185e-29
Fkbp5	192.994	23.6857	1.98401	11.9383	7.47113e-33	3.14844e-31
Piwil4	192.046	27.4717	3.18529	8.62455	6.43454e-18	1.28441e-16
Kirrel2	192.034	27.3658	1.82028	15.0339	4.40619e-51	4.08083e-49
St18	191.884	11.7497	1.66394	7.06135	1.64887e-12	2.33823e-11
Capn5	191.662	21.1144	2.5835	8.17281	3.01288e-16	5.39783e-15
Zfp874a	191.542	25.2619	1.94405	12.9945	1.31503e-38	7.16189e-37
Rab20	191.522	17.8947	3.30292	5.41783	6.03262e-08	5.88997e-07
Stox2	191.157	26.9773	1.48373	18.1821	7.15145e-74	1.89087e-71
Clic4	191.025	5.39243	1.40717	3.8321	0.000127052	0.000873645
Emx2os	190.764	26.2782	1.74178	15.087	1.97312e-51	1.85893e-49
Tmem37	190.182	24.9371	2.41673	10.3185	5.81236e-25	1.69843e-23
Pde10a	190.014	8.57907	1.59429	5.38111	7.40288e-08	7.16384e-07
Pacc1	189.966	27.4032	1.85767	14.7514	3.01443e-49	2.5212e-47
Zfp40	189.715	26.6519	2.35542	11.3151	1.10434e-29	4.00518e-28
Scnn1b	189.573	20.7372	2.08549	9.94354	2.69096e-23	7.0921e-22
Ctso	187.399	24.1972	2.12832	11.3692	5.95511e-30	2.19375e-28
Eva1c	186.135	9.54409	1.59243	5.9934	2.05504e-09	2.30742e-08
Pdgfd	185.985	18.5976	2.44611	7.60292	2.89521e-14	4.57678e-13
Pnpla7	184.781	13.2693	1.87472	7.07801	1.46235e-12	2.07912e-11
Rgmb	184.779	9.10752	1.3427	6.78299	1.17713e-11	1.56884e-10
Wnt7a	184.227	24.1468	2.18209	11.0659	1.83549e-28	6.25556e-27
Gm13394	183.742	6.25408	0.769463	8.12784	4.37005e-16	7.74467e-15
Rap1gap2	183.332	7.44729	1.31236	5.67474	1.38902e-08	1.42849e-07
Lonrf3	182.872	21.9596	2.34014	9.38388	6.35902e-21	1.49775e-19
Epb41l1	182.384	24.5274	1.93222	12.6939	6.39405e-37	3.23511e-35
Ipo4	182.286	6.75779	1.30517	5.17771	2.2463e-07	2.06526e-06
D11Wsu47e	182.047	26.9261	1.44963	18.5745	5.16801e-77	1.4863e-74
Mb21d2	181.961	9.63559	1.54103	6.2527	4.03429e-10	4.77847e-09
Podxl2	181.899	11.7194	1.42329	8.234	1.81071e-16	3.30177e-15
Rps18-ps5	181.831	5.5363	0.661315	8.37166	5.68121e-17	1.06437e-15
Plin2	181.376	24.3545	2.41629	10.0793	6.82147e-24	1.87625e-22
Synpo	181.112	27.1239	1.95951	13.8422	1.41879e-43	9.65074e-42
Wnt7b	180.744	9.53161	2.21159	4.30986	1.63361e-05	0.000123608
Vwa2	180.667	26.7992	1.87911	14.2616	3.79477e-46	2.87998e-44
Chrng	180.548	24.6431	2.30829	10.6759	1.31938e-26	4.13548e-25
Nbl1	180.448	27.0971	2.30416	11.7601	6.26938e-32	2.52516e-30
Ucp3	180.104	9.325	1.74414	5.34646	8.96905e-08	8.60326e-07
S1pr1	180.079	19.7919	2.56357	7.72043	1.15938e-14	1.87619e-13
Esrp2	179.674	27.0656	1.59535	16.9654	1.4814e-64	2.52964e-62
AW146154	179.382	25.7302	1.84003	13.9835	1.96457e-44	1.39417e-42
Cdc42ep1	179.172	25.5798	2.14982	11.8986	1.20328e-32	4.98117e-31
Rcan2	178.644	14.5732	2.5258	5.76973	7.93974e-09	8.37018e-08
Etv3	178.599	5.69632	1.36768	4.16496	3.1141e-05	0.000228844
Msi1	178.471	3.45249	0.796861	4.33262	1.47347e-05	0.000112087
Hsd11b2	177.726	27.8218	2.32268	11.9783	4.61582e-33	1.95523e-31
Lfng	177.569	10.4312	1.34068	7.78054	7.22135e-15	1.18974e-13
Afap1l2	177.319	10.443	1.80461	5.78683	7.17279e-09	7.61058e-08
Gipr	176.527	27.8672	2.31484	12.0385	2.22992e-33	9.59449e-32
Dhcr7	176.377	8.31818	1.2537	6.63492	3.24674e-11	4.17442e-10
Nacad	176.23	28.2477	2.27721	12.4045	2.46991e-35	1.16348e-33
Gm20559	175.219	26.2652	2.34081	11.2206	3.23099e-29	1.15142e-27
Ifngr1	175.102	25.9194	2.1432	12.0938	1.13896e-33	4.98504e-32
Hexb	174.811	9.61544	1.60844	5.97811	2.25748e-09	2.52607e-08
Iffo2	173.966	11.3955	1.26964	8.97542	2.82274e-19	6.0966e-18
Heg1	173.785	11.3633	1.98609	5.72141	1.05646e-08	1.09959e-07
Syde2	173.656	27.6971	2.29456	12.0708	1.50745e-33	6.57223e-32
Ndst1	173.21	27.4007	1.27129	21.5534	4.91877e-103	5.37556e-100
Tgfbr1	172.829	9.16372	1.7327	5.28868	1.23201e-07	1.16742e-06
Gabrr1	172.273	29.8396	3.59327	8.3043	1.00412e-16	1.85366e-15
Prpsap2	172.011	6.42312	1.37312	4.67777	2.90005e-06	2.36403e-05
Slc16a5	171.964	29.7974	2.1584	13.8053	2.36835e-43	1.58467e-41
Arhgef5	171.882	22.9336	1.75835	13.0427	6.9965e-39	3.87478e-37
Dpyd	171.238	22.8544	2.51717	9.07944	1.09138e-19	2.38865e-18
Fndc3b	170.478	9.72652	1.98435	4.90162	9.50511e-07	8.1537e-06
Mipol1	170.196	11.9718	1.65125	7.25016	4.1628e-13	6.09838e-12
Spry1	170.122	24.9815	2.12837	11.7374	8.19465e-32	3.27646e-30
Timm21	170.052	25.386	2.04122	12.4367	1.65275e-35	7.89898e-34
Tspan7	169.718	25.5951	1.81261	14.1206	2.83642e-45	2.07578e-43
Plcl2	169.621	24.6222	1.64524	14.9657	1.22931e-50	1.09522e-48
Vwa5b2	167.981	9.33272	2.19398	4.25379	2.10182e-05	0.000157401
Efcab1	166.924	26.8591	2.94917	9.10736	8.44139e-20	1.86496e-18
Pdzk1ip1	166.758	9.38186	2.36715	3.96336	7.39032e-05	0.000522872
Bcl2l14	166.247	24.6993	2.86275	8.62783	6.25283e-18	1.25003e-16
Oxa1l	166.025	5.47672	1.40319	3.90304	9.4991e-05	0.000662351
Pam	165.925	24.9183	1.35329	18.4132	1.02989e-75	2.91086e-73
Gpc1	164.759	9.96202	1.66988	5.9657	2.43589e-09	2.71643e-08
Cpm	164.337	21.5384	2.55212	8.43944	3.18869e-17	6.08524e-16
Mup4	164.073	29.1909	3.25155	8.97754	2.76884e-19	5.98807e-18
Znhit2	164.038	6.34822	1.27518	4.97831	6.41429e-07	5.59603e-06
AC109619.1	163.794	27.1492	1.38473	19.6061	1.37136e-85	6.42307e-83
Dclk2	162.257	25.3581	1.72065	14.7376	3.69933e-49	3.07833e-47
Rab3c	161.567	10.2999	1.94161	5.3048	1.12797e-07	1.07255e-06
Mid2	161.421	25.6199	1.90674	13.4365	3.69381e-41	2.25103e-39
Apoa5	161.296	26.7547	2.74787	9.73651	2.10662e-22	5.2643e-21
L3mbtl3	161.171	26.9895	1.88686	14.304	2.0671e-46	1.57609e-44
Zfp2	160.908	26.6757	1.78694	14.9281	2.16365e-50	1.90692e-48
Efna3	160.837	11.1329	1.90986	5.82915	5.57108e-09	5.97688e-08
Scara3	160.395	39.3942	2.43113	16.2041	4.71879e-59	6.50043e-57
Tst	160.02	27.1437	1.81561	14.9501	1.5542e-50	1.37719e-48
Gm35696	159.65	11.3304	1.78679	6.34122	2.27954e-10	2.74365e-09
Cwc22	156.012	26.3684	1.66294	15.8565	1.26843e-56	1.63727e-54
Ctbs	155.475	9.58919	1.64419	5.83217	5.47118e-09	5.87355e-08
Gm12962	155.457	11.4116	1.56105	7.31023	2.66681e-13	3.97067e-12
Ccnjl	155.183	27.7617	1.96685	14.1148	3.07827e-45	2.24276e-43
Crym	154.533	25.5498	3.475	7.35247	1.94581e-13	2.93178e-12
Mpc1-ps	153.849	5.54706	0.55458	10.0023	1.48943e-23	3.98958e-22
Rhov	153.483	26.5395	2.12794	12.4719	1.06226e-35	5.12167e-34
Macc1	153.38	25.6245	1.91577	13.3755	8.40648e-41	5.04789e-39
Rdh11	152.74	12.0554	1.88014	6.41198	1.43642e-10	1.74943e-09
Zfp945	152.144	27.0833	1.83125	14.7895	1.7134e-49	1.45532e-47
Arhgef6	152.121	31.0204	1.97541	15.7033	1.43679e-55	1.68238e-53
Socs3	152.05	24.185	2.0261	11.9367	7.615e-33	3.20084e-31
Lyrm1	151.7	26.0637	1.63688	15.9228	4.40038e-57	5.81737e-55
Trpm6	151.633	29.352	2.20162	13.332	1.50782e-40	8.92337e-39
4833418N02Rik	151.617	27.5796	1.9822	13.9136	5.23602e-44	3.63704e-42
Adssl1	151.168	26.9548	2.18731	12.3232	6.79152e-35	3.13615e-33
Traf3ip2	150.985	25.6777	1.31573	19.5159	8.0366e-85	3.46695e-82
Kifc3	150.817	26.2248	2.06341	12.7094	5.24183e-37	2.67692e-35
Yap1	150.704	22.6057	1.42578	15.855	1.29917e-56	1.66385e-54
Cracr2b	150.148	11.4796	1.69555	6.77045	1.28385e-11	1.70552e-10
Zfp948	150.123	26.1512	2.16834	12.0604	1.70857e-33	7.40967e-32
Pex5	149.946	9.96158	1.54939	6.42937	1.28136e-10	1.56853e-09
Sema3f	149.443	25.9493	2.08801	12.4277	1.84764e-35	8.77925e-34
Dclre1c	148.215	9.99799	1.73849	5.75096	8.87364e-09	9.28899e-08
Mgat4a	147.879	23.0589	1.99028	11.5858	4.86484e-31	1.88533e-29
Nectin4	147.662	26.9485	2.25921	11.9283	8.42835e-33	3.52464e-31
Zfp959	147.223	10.719	2.29961	4.66124	3.14307e-06	2.55451e-05
Ttc30b	147.192	26.3989	2.04582	12.9038	4.28206e-38	2.27909e-36
Gm10631	146.726	27.7964	2.63247	10.5591	4.61242e-26	1.41066e-24
Il18	146.671	22.9989	2.59584	8.8599	8.00869e-19	1.68532e-17
Zfp609	145.805	6.48701	1.37225	4.72727	2.27559e-06	1.8755e-05
Gch1	145.62	19.864	3.25488	6.10283	1.04209e-09	1.19797e-08
Tcf7l2	145.453	8.19849	1.38836	5.90516	3.52312e-09	3.86835e-08
Ncapd3	145.253	8.70262	1.98103	4.39299	1.11803e-05	8.6087e-05
Evi5l	145.15	7.08632	1.67	4.24331	2.2025e-05	0.00016434
Ifi35	145.093	23.0966	2.01149	11.4823	1.61876e-30	6.07237e-29
Actrt3	144.969	28.0906	1.94884	14.414	4.2246e-47	3.25136e-45
Adam9	144.768	10.0475	1.3072	7.68625	1.51516e-14	2.42784e-13
Ddx28	144.656	13.2362	2.03872	6.49241	8.44757e-11	1.0483e-09
Apoa1	144.029	10.945	1.35831	8.05779	7.76833e-16	1.35187e-14
Radil	143.939	24.9672	2.21821	11.2555	2.17473e-29	7.81806e-28
Rrp9	143.732	26.0544	1.74654	14.9178	2.52641e-50	2.20295e-48
Cecr2	143.319	6.86084	1.54014	4.45468	8.40196e-06	6.57125e-05
Fzd4	143.085	25.6073	1.70759	14.9962	7.77872e-51	7.0064e-49
Prps2	142.991	25.8738	2.24494	11.5254	9.82544e-31	3.74578e-29
Ube2o	142.265	10.0951	1.85349	5.44657	5.13514e-08	5.04679e-07
Naip5	142.069	28.4058	2.93527	9.67742	3.76085e-22	9.28488e-21
Siae	141.784	24.8168	2.69093	9.22239	2.90539e-20	6.57846e-19
Irf1	141.508	10.5658	2.47021	4.2773	1.89177e-05	0.000142321
Nup54	140.898	25.8971	1.52889	16.9386	2.33775e-64	3.91049e-62
Pgm5	140.684	21.5654	1.51839	14.2028	8.8054e-46	6.56123e-44
Klf2	140.573	10.4251	2.69655	3.86609	0.000110594	0.00076561
Dtx1	140.25	11.7857	1.71028	6.89113	5.53497e-12	7.60559e-11
Rasal1	139.89	28.4682	2.20554	12.9076	4.07954e-38	2.1807e-36
Arhgef17	139.026	26.5328	1.68801	15.7184	1.13222e-55	1.35478e-53
Hip1	138.733	25.1293	2.02613	12.4026	2.5295e-35	1.18814e-33
Col18a1	138.709	28.0187	2.11822	13.2275	6.09178e-40	3.54123e-38
Abcd2	138.379	27.6386	2.50172	11.0478	2.24534e-28	7.62069e-27
Gstm7	137.845	22.9203	2.25882	10.147	3.41637e-24	9.56429e-23
Kctd12	137.528	25.0908	3.48218	7.20549	5.78374e-13	8.42781e-12
Mr1	137.513	25.6231	2.09623	12.2234	2.33199e-34	1.05896e-32
Slc44a3	136.582	9.00033	1.72081	5.23028	1.69253e-07	1.58276e-06
Mrm1	136.377	26.2402	1.96807	13.333	1.48849e-40	8.87303e-39
Aaas	135.788	7.96235	1.72797	4.60792	4.06723e-06	3.27315e-05
Ccser1	135.404	6.42494	1.60038	4.01464	5.95354e-05	0.000426744
Vasn	135.396	28.8016	1.76066	16.3584	3.78886e-60	5.49652e-58
Ctdspl	135.172	21.0558	1.81317	11.6127	3.55232e-31	1.38321e-29
Pde3b	135.109	18.4671	2.90186	6.36388	1.96717e-10	2.38167e-09
Lrrc41	134.773	5.17918	1.33753	3.87219	0.000107863	0.000747338
Zc3hav1	134.621	24.7646	1.97942	12.5111	6.49377e-36	3.15882e-34
Mbp	134.456	27.5231	1.65081	16.6724	2.07904e-62	3.27708e-60
Htra1	133.641	22.4618	3.84089	5.84807	4.9732e-09	5.37413e-08
Tenm3	133.57	9.44261	1.64198	5.75076	8.88445e-09	9.29438e-08
Ift88	133.333	11.8062	1.32555	8.90665	5.25998e-19	1.12275e-17
Rab36	133.099	9.53539	1.60924	5.9254	3.11536e-09	3.44409e-08
Adamts1	132.945	22.4596	2.44349	9.19161	3.87008e-20	8.69072e-19
Vill	132.296	18.8025	2.9083	6.46512	1.01216e-10	1.24755e-09
Ing2	131.518	8.64288	1.68175	5.13921	2.759e-07	2.51268e-06
Nudt7	131.393	25.6483	1.71904	14.9202	2.43723e-50	2.13655e-48
Fetub	131.255	24.1837	2.28827	10.5685	4.16952e-26	1.27759e-24
Dll1	131.145	25.9069	2.39471	10.8184	2.8168e-27	9.08971e-26
Galnt9	131.014	27.4076	2.25918	12.1316	7.17944e-34	3.1895e-32
Tiam2	130.468	7.16619	1.30472	5.4925	3.96281e-08	3.93711e-07
Hspa1b	130.229	23.2357	1.97423	11.7695	5.60458e-32	2.26295e-30
Rorc	130.116	24.6123	2.38534	10.3182	5.83291e-25	1.7014e-23
Rassf5	129.662	25.7191	1.47891	17.3906	9.7282e-68	1.99343e-65
Tlr3	127.897	24.3616	2.88942	8.4313	3.41843e-17	6.51609e-16
Dusp3	127.683	5.99881	1.51267	3.96572	7.31762e-05	0.000517952
Bglap3	127.559	24.7185	1.97572	12.5112	6.48602e-36	3.15882e-34
2610021A01Rik	127.507	25.5108	2.12611	11.9989	3.60262e-33	1.52999e-31
Haus8	126.629	26.2824	1.67276	15.712	1.25165e-55	1.48683e-53
Pkia	126.381	25.8011	2.44458	10.5544	4.84666e-26	1.47954e-24
Dgkd	126.354	26.4937	1.89565	13.9761	2.18147e-44	1.54141e-42
Phf7	126.328	16.6034	2.97561	5.57984	2.40738e-08	2.43156e-07
Trim56	126.045	18.727	2.00868	9.32306	1.13036e-20	2.62838e-19
Plscr3	125.772	23.5288	1.97154	11.9342	7.84742e-33	3.2901e-31
Fam122b	125.54	22.5955	2.0567	10.9863	4.44785e-28	1.49108e-26
Slx4	125.376	9.09041	2.01543	4.51041	6.47039e-06	5.10193e-05
Gramd3	125.228	24.8075	1.87512	13.2299	5.90034e-40	3.44215e-38
Acp6	124.191	24.5706	2.40562	10.2139	1.71867e-24	4.89985e-23
Slc10a3	124.081	24.7582	2.11893	11.6843	1.53368e-31	6.04366e-30
Fut1	124.016	11.1742	2.06086	5.42211	5.88998e-08	5.76445e-07
Ppp1r36	123.647	25.9989	2.18734	11.8861	1.39788e-32	5.77217e-31
Aass	123.004	24.747	2.10167	11.7749	5.25538e-32	2.13246e-30
Apool	122.934	10.7423	1.69734	6.32889	2.4693e-10	2.96551e-09
Fam110a	122.916	9.45014	1.81345	5.21114	1.87687e-07	1.74025e-06
Ephx4	122.874	7.2059	1.73653	4.1496	3.3306e-05	0.000244179
Sulf2	122.659	25.5212	2.53526	10.0665	7.77067e-24	2.11602e-22
Klhl25	122.596	25.2138	2.05179	12.2887	1.04199e-34	4.77131e-33
Gm49327	122.138	25.4226	1.84048	13.8131	2.12579e-43	1.4282e-41
Casp9	121.954	7.94082	1.85886	4.27187	1.93843e-05	0.000145631
Ltbr	121.947	18.8434	2.45853	7.66449	1.79543e-14	2.86308e-13
Tnk1	121.931	9.40006	1.88015	4.99963	5.74416e-07	5.03551e-06
Tctn2	121.494	8.81502	1.73075	5.09317	3.52124e-07	3.16989e-06
Ovol2	121.309	22.924	2.05907	11.1332	8.65162e-29	3.02401e-27
A730020E08Rik	121.251	9.37343	2.26692	4.13488	3.55141e-05	0.000259903
Trmt9b	121.204	9.39131	1.70954	5.49348	3.94091e-08	3.91773e-07
Vwa5a	120.903	23.7834	3.31925	7.16527	7.76322e-13	1.12224e-11
Ackr3	120.825	15.9274	2.59896	6.12838	8.87761e-10	1.02559e-08
Sel1l3	120.652	25.9147	2.10415	12.316	7.42779e-35	3.42033e-33
Amer1	120.439	23.8472	2.40953	9.89704	4.28764e-23	1.12101e-21
Lrrc8d	120.156	6.87856	1.1779	5.83967	5.23049e-09	5.6336e-08
Dnajc12	119.357	9.37929	1.75	5.3596	8.34068e-08	8.02399e-07
Kat2a	119.23	11.1921	1.50185	7.45221	9.1786e-14	1.40753e-12
Alms1	119.169	9.1687	1.81074	5.0635	4.11632e-07	3.67331e-06
Gng7	119.116	10.5115	2.39546	4.3881	1.14345e-05	8.79204e-05
Ncdn	118.968	9.03653	1.76158	5.1298	2.90057e-07	2.63283e-06
Smim13	118.816	26.6385	1.68064	15.8502	1.40115e-56	1.78055e-54
Xpnpep3	118.453	8.97043	2.08412	4.30419	1.67597e-05	0.000126609
Dnase1l1	117.811	25.4938	2.093	12.1805	3.94837e-34	1.77331e-32
Gm10638	117.253	22.5946	1.78715	12.6429	1.22521e-36	6.14214e-35
Rcan1	117.165	24.1875	1.83011	13.2164	7.05911e-40	4.08905e-38
Nhs	117.072	24.427	2.0035	12.1921	3.42273e-34	1.54145e-32
Prodh	116.811	23.8748	2.30236	10.3697	3.40483e-25	1.00387e-23
B4galnt3	116.381	8.37983	1.35976	6.16275	7.14928e-10	8.31783e-09
Nudt19	116.068	26.5326	1.90794	13.9064	5.79135e-44	4.0058e-42
Nfkbid	116.004	26.5116	2.84425	9.32114	1.15102e-20	2.67262e-19
Wfdc3	115.467	17.4018	2.5907	6.71705	1.85445e-11	2.432e-10
Smcr8	115.444	22.8004	2.45296	9.29506	1.47126e-20	3.38265e-19
Enpp1	115.411	24.0878	2.72895	8.82678	1.07737e-18	2.24129e-17
Clip4	115.131	27.3268	2.72898	10.0136	1.32882e-23	3.57689e-22
Slc35d3	115.122	24.8468	2.89475	8.58341	9.21048e-18	1.83015e-16
Chst1	114.72	19.7353	3.00743	6.56217	5.30311e-11	6.70786e-10
P2ry2	114.624	22.6951	2.04425	11.1019	1.22786e-28	4.25544e-27
Fam118a	114.289	8.59855	2.03751	4.22013	2.4416e-05	0.000181438
Nab2	114.082	23.6042	3.2225	7.3248	2.39258e-13	3.5721e-12
Epha1	113.83	22.9421	1.99963	11.4731	1.79992e-30	6.73655e-29
Wdr92	113.826	25.3232	1.98582	12.752	3.03809e-37	1.57606e-35
Disp3	113.808	27.1841	2.32374	11.6984	1.29847e-31	5.12912e-30
Fbxl15	113.76	7.49266	1.65632	4.52367	6.07777e-06	4.80621e-05
Ripor3	113.736	12.3467	2.2881	5.39605	6.81238e-08	6.61193e-07
Rpusd1	113.692	10.4807	1.84024	5.69531	1.23151e-08	1.2737e-07
Zfp37	113.094	25.2936	3.26004	7.75867	8.58231e-15	1.40549e-13
Cdc20	112.837	18.5545	3.02179	6.14023	8.24022e-10	9.53969e-09
Ankib1	112.462	7.14842	1.85176	3.86033	0.000113235	0.000783231
Grb7	112.188	25.2984	2.04761	12.3551	4.57361e-35	2.12394e-33
Slc35d1	112.085	24.877	1.83048	13.5904	4.56427e-42	2.88889e-40
Hmox1	112.059	25.4393	2.47699	10.2702	9.59657e-25	2.76966e-23
Parp12	111.71	20.7773	2.542	8.1736	2.99325e-16	5.36852e-15
Sumf1	111.542	25.3367	1.818	13.9366	3.79853e-44	2.66108e-42
Atp8b2	111.474	25.5464	2.11929	12.0542	1.84297e-33	7.95046e-32
Myadm	111.435	23.2938	2.82406	8.24836	1.60585e-16	2.93475e-15
Dact2	111.18	23.742	1.91306	12.4104	2.29371e-35	1.08359e-33
Sox21	111.08	22.5613	2.14761	10.5053	8.16701e-26	2.46559e-24
Gsg1l	110.989	27.2431	2.71767	10.0245	1.19016e-23	3.21423e-22
Naprt	110.839	26.0738	2.90428	8.97772	2.76446e-19	5.98649e-18
4732419C18Rik	110.734	18.7663	2.56835	7.30676	2.73654e-13	4.0671e-12
Net1	110.413	24.0677	2.6107	9.21885	3.00294e-20	6.78061e-19
Gm49890	110.378	8.78258	1.44377	6.08309	1.17891e-09	1.35051e-08
Spock1	110.23	24.3545	3.54668	6.86685	6.56359e-12	8.93359e-11
Prdm2	110.196	8.05494	1.36982	5.88031	4.09509e-09	4.46348e-08
Elac1	110.126	9.82576	2.3165	4.24164	2.21897e-05	0.000165494
Cfap61	109.758	9.54264	1.87098	5.10034	3.39038e-07	3.06136e-06
Coro2b	109.626	11.358	1.71448	6.62476	3.4782e-11	4.44412e-10
Rab37	109.484	29.7043	3.05566	9.72108	2.45179e-22	6.11754e-21
Stambpl1	109.035	8.59031	2.06714	4.15566	3.24355e-05	0.000237904
Epha8	108.98	26.3998	2.1194	12.4563	1.29291e-35	6.19729e-34
Trp53i13	108.833	26.1173	2.00465	13.0284	8.43872e-39	4.64214e-37
B4galt6	108.682	24.0089	1.46342	16.4061	1.73103e-60	2.57971e-58
Gsto1	107.86	20.1899	2.82229	7.15371	8.44611e-13	1.21989e-11
Naf1	107.479	7.09171	1.72954	4.10034	4.12549e-05	0.000300174
Nln	107.338	25.721	1.78406	14.4171	4.03917e-47	3.12331e-45
Prdm15	107.319	9.14682	2.04823	4.46573	7.97976e-06	6.247e-05
Slco4a1	107.242	25.278	2.4841	10.1759	2.53993e-24	7.16645e-23
Itgb6	106.854	24.8287	2.15691	11.5112	1.15828e-30	4.38516e-29
Serinc5	106.837	10.6727	1.72006	6.20484	5.47515e-10	6.42019e-09
Zfp994	106.783	8.72167	2.23172	3.90804	9.30482e-05	0.000649357
Oca2	106.54	28.8328	2.49825	11.5412	8.17555e-31	3.13135e-29
Tmem14a	106.308	25.5186	1.91673	13.3136	1.92944e-40	1.13775e-38
Cyp2j9	105.863	23.4814	3.4467	6.81272	9.57697e-12	1.2879e-10
Tacc3	105.845	7.74439	1.9353	4.00164	6.2906e-05	0.000448941
4930455G09Rik	105.793	7.58446	1.33434	5.68405	1.31541e-08	1.35705e-07
Fam83f	105.472	25.2804	1.73221	14.5943	3.0531e-48	2.44144e-46
Slc22a17	105.444	22.0966	2.29885	9.61202	7.11367e-22	1.74312e-20
Tmco6	104.775	24.8911	2.19384	11.3459	7.7736e-30	2.85084e-28
Pafah2	104.466	23.9307	2.24403	10.6642	1.49713e-26	4.68366e-25
Helz2	104.46	8.60619	1.98929	4.32626	1.51664e-05	0.000115317
Upp1	103.929	18.9853	3.24006	5.85954	4.64161e-09	5.02576e-08
Srf	103.896	6.25883	1.55996	4.01219	6.01591e-05	0.000430838
Pank1	103.708	26.9273	2.12115	12.6947	6.33013e-37	3.21269e-35
Nat2	103.66	26.4604	2.26676	11.6732	1.74643e-31	6.8491e-30
Notch1	103.4	22.2807	2.17873	10.2265	1.5092e-24	4.31015e-23
Lipg	103.368	7.15485	1.5646	4.57295	4.80912e-06	3.84003e-05
Uchl1	103.31	21.2999	2.76081	7.71509	1.20894e-14	1.9506e-13
Rbfox3	103.213	25.8999	3.26884	7.92326	2.31363e-15	3.91003e-14
Aatk	102.935	26.9933	1.94542	13.8753	8.94277e-44	6.10829e-42
Ptger4	102.918	24.5604	2.69634	9.10881	8.32924e-20	1.84266e-18
Myzap	102.648	25.1361	2.56881	9.78513	1.30427e-22	3.31488e-21
Fam78b	102.491	10.4721	1.89417	5.52861	3.22771e-08	3.22437e-07
Ptgs2	102.248	22.6661	3.37259	6.72067	1.80897e-11	2.37425e-10
Flot2	102.184	24.5654	1.94491	12.6306	1.43122e-36	7.15303e-35
Rhbdf1	102.15	22.5374	2.45549	9.17836	4.37698e-20	9.7888e-19
Slain1	101.999	11.3995	1.82181	6.2572	3.91945e-10	4.64917e-09
Lekr1	101.766	25.976	2.04036	12.7311	3.9727e-37	2.04152e-35
Vegfd	101.372	25.9881	2.10097	12.3696	3.81735e-35	1.78284e-33
P4htm	101.227	10.6366	2.41872	4.39762	1.09446e-05	8.43514e-05
Mettl18	101.17	26.3327	2.54049	10.3652	3.56898e-25	1.0485e-23
Atg10	100.731	9.75299	2.09566	4.65389	3.25728e-06	2.6447e-05
Pkn3	100.605	26.8112	2.42713	11.0465	2.27932e-28	7.72001e-27
Atxn3	100.567	8.76011	1.59747	5.48374	4.16429e-08	4.13478e-07
Parp9	100.526	24.116	3.85725	6.25213	4.04901e-10	4.79244e-09
Haus3	100.325	8.89353	1.92716	4.61485	3.93385e-06	3.17048e-05
Slc4a10	99.6851	25.3556	1.78188	14.2297	5.99266e-46	4.50631e-44
Rad21l	99.6727	27.1716	2.06509	13.1576	1.53984e-39	8.76477e-38
Rin3	99.5844	9.00228	1.70371	5.28393	1.26441e-07	1.19467e-06
Arg2	99.522	23.4767	2.08875	11.2396	2.60572e-29	9.32653e-28
Tmc6	99.5093	25.0951	3.05022	8.22731	1.91464e-16	3.48353e-15
Slc16a2	99.3665	27.8695	2.81982	9.88343	4.91224e-23	1.28023e-21
Mylip	99.3443	23.3956	3.0847	7.58441	3.33991e-14	5.25948e-13
Efcab15	99.2029	5.38656	1.23477	4.3624	1.28641e-05	9.83128e-05
Gm13782	98.6339	23.6618	2.18414	10.8335	2.3897e-27	7.72668e-26
Pdzd8	98.4205	12.0515	1.72985	6.96677	3.24296e-12	4.52442e-11
Bbc3	98.1273	27.3358	2.22552	12.2829	1.11916e-34	5.11042e-33
Lhfpl2	98.1065	25.4038	2.4353	10.4315	1.78099e-25	5.31799e-24
Fbxo10	97.5597	25.783	1.74168	14.8036	1.38928e-49	1.19238e-47
Gm42528	97.3186	25.4922	2.20174	11.5782	5.31569e-31	2.05519e-29
Arhgap31	97.2039	25.5556	1.99427	12.8145	1.35981e-37	7.14469e-36
Pdgfa	96.9821	9.0794	1.53786	5.90391	3.54986e-09	3.89249e-08
Wdr55	96.8456	26.0138	1.892	13.7493	5.14049e-43	3.38426e-41
Arhgap33	96.8206	29.873	2.67123	11.1833	4.92442e-29	1.73979e-27
2610528J11Rik	96.7894	17.1847	2.13001	8.06792	7.15068e-16	1.24836e-14
Nrtn	96.6026	8.62174	1.81059	4.76184	1.91831e-06	1.60035e-05
Top3a	96.3648	20.0203	2.67679	7.47923	7.47576e-14	1.15287e-12
Zfp747	96.2564	23.6104	3.36576	7.01487	2.3017e-12	3.23878e-11
Dse	96.157	18.0842	2.29129	7.89261	2.95934e-15	4.96546e-14
H2-DMb1	96.0268	17.4528	2.68786	6.4932	8.40316e-11	1.04358e-09
Arsg	95.0803	26.2011	1.94901	13.4433	3.36983e-41	2.06126e-39
Kcnab1	95.0253	16.7666	3.02601	5.54082	3.01064e-08	3.01671e-07
Fam117a	94.5776	25.9517	1.11846	23.203	4.24934e-119	1.16099e-115
Nme5	94.5292	26.7414	1.70476	15.6863	1.87706e-55	2.18232e-53
Scnn1a	94.3247	26.0034	2.35989	11.0189	3.09777e-28	1.04275e-26
Mical1	94.2461	27.3324	2.90694	9.40248	5.32931e-21	1.26248e-19
Klhl23	94.1282	25.4903	2.87983	8.85131	8.64973e-19	1.81556e-17
Tmem125	93.873	29.7934	3.12391	9.53723	1.46697e-21	3.53648e-20
Batf	93.8179	25.552	3.40286	7.50898	5.95904e-14	9.24186e-13
Gm20368	93.6779	26.9169	3.0511	8.82203	1.12398e-18	2.33529e-17
Slc25a24	93.5994	22.87	2.6737	8.55367	1.1924e-17	2.34377e-16
Myd88	93.3092	24.9423	1.97797	12.6101	1.85856e-36	9.23251e-35
Pld1	93.2688	24.0732	2.37515	10.1355	3.8456e-24	1.06668e-22
Pcsk4	93.0795	20.2309	3.18481	6.35232	2.12089e-10	2.5621e-09
Lpgat1	93.037	24.113	2.26335	10.6537	1.67646e-26	5.23471e-25
Acsl5	92.6938	23.7271	1.89818	12.4999	7.47168e-36	3.62376e-34
Egfros	92.6217	14.8682	2.2239	6.68564	2.29912e-11	2.99598e-10
Clcn5	92.6133	24.5521	2.35031	10.4463	1.52314e-25	4.56469e-24
9130008F23Rik	92.5605	19.066	2.15608	8.8429	9.32626e-19	1.94758e-17
Rps2-ps10	92.4989	6.66434	0.79599	8.37239	5.64616e-17	1.05901e-15
Pwwp2b	92.2933	9.48576	2.1314	4.45048	8.568e-06	6.68198e-05
Sytl5	92.0705	17.7895	2.24699	7.91703	2.43253e-15	4.10674e-14
A730089K16Rik	92.0005	21.5934	2.75315	7.84319	4.39246e-15	7.3028e-14
Slc25a53	91.9472	25.2779	2.1325	11.8536	2.06082e-32	8.46693e-31
Clybl	91.7526	23.8419	2.3856	9.99408	1.61777e-23	4.32629e-22
Rhbdl3	91.5491	14.4542	2.32091	6.2278	4.73037e-10	5.56605e-09
Btbd17	91.5292	26.4822	1.72095	15.3881	1.96584e-53	2.05261e-51
Gemin8	91.5243	10.7328	2.22175	4.83081	1.35979e-06	1.14843e-05
Rhbdf2	91.4677	27.32	2.7186	10.0493	9.2539e-24	2.51158e-22
Rnf125	91.4431	28.7224	2.9809	9.6355	5.6615e-22	1.39353e-20
Fzd7	91.3605	23.437	2.20917	10.6089	2.70861e-26	8.40952e-25
Gpr157	90.9212	26.5867	1.84076	14.4434	2.76037e-47	2.1548e-45
Plekhd1	90.4999	23.9618	2.42187	9.89391	4.42385e-23	1.15478e-21
Dusp5	90.3982	25.0728	2.14089	11.7114	1.11419e-31	4.43324e-30
Kazn	90.3526	25.3705	1.89251	13.4058	5.59307e-41	3.37085e-39
Inf2	90.3155	24.6735	2.17951	11.3207	1.03657e-29	3.76772e-28
Med12l	89.9581	8.31657	2.05489	4.0472	5.18333e-05	0.000373332
Unc93b1	89.8646	26.5103	2.63629	10.0559	8.64993e-24	2.35155e-22
1810020O05Rik	89.4093	11.8687	2.17957	5.44542	5.16844e-08	5.07647e-07
Slc14a1	89.4076	26.6435	2.64532	10.072	7.34979e-24	2.01144e-22
Gm49331	88.6776	24.6968	2.59935	9.50114	2.07599e-21	4.99731e-20
Eri1	88.3291	26.0661	2.38825	10.9143	9.84712e-28	3.23495e-26
Itpkc	88.2668	25.9397	1.93366	13.4148	4.95082e-41	2.99479e-39
Spata13	88.2002	24.787	2.14418	11.5602	6.55821e-31	2.52368e-29
Atoh8	87.441	25.7979	3.03925	8.48827	2.09743e-17	4.06902e-16
Fam151b	87.4055	25.6647	2.00271	12.815	1.35092e-37	7.12078e-36
2810006K23Rik	87.3688	9.54972	1.74207	5.48182	4.20976e-08	4.17235e-07
Pdxk	86.8369	7.20882	1.74666	4.1272	3.67212e-05	0.000268617
Bcar3	86.0917	23.8862	1.79739	13.2894	2.66683e-40	1.56693e-38
Hs3st6	86.0441	26.5078	2.9119	9.10326	8.76627e-20	1.92893e-18
Cish	85.8771	25.0888	2.57384	9.74762	1.8885e-22	4.73366e-21
Bbs5	85.6048	11.895	1.93378	6.15115	7.69233e-10	8.91799e-09
1700017B05Rik	85.5843	23.4276	2.95465	7.92907	2.20792e-15	3.74296e-14
Mfsd2a	85.2389	24.3193	2.34534	10.3692	3.42284e-25	1.00737e-23
N4bp3	85.2333	19.7178	4.20228	4.69218	2.70314e-06	2.20681e-05
Abracl	85.0504	9.31887	1.31622	7.08004	1.44115e-12	2.05075e-11
Pla2g4a	84.8314	23.5571	3.88556	6.06274	1.33819e-09	1.52658e-08
Cyb5d1	84.6396	10.9779	1.8582	5.90782	3.46662e-09	3.81398e-08
Nek8	84.4066	24.9302	2.2965	10.8558	1.87259e-27	6.10285e-26
5330431K02Rik	84.2572	27.6193	2.44317	11.3047	1.24345e-29	4.49975e-28
Gck	84.252	25.3419	3.4148	7.42119	1.1607e-13	1.76999e-12
Vrk2	84.0555	25.0438	2.36562	10.5866	3.43994e-26	1.06197e-24
Elovl6	84.0389	19.6067	2.86536	6.84267	7.77286e-12	1.05481e-10
Snca	83.7471	25.5685	3.50915	7.28624	3.18736e-13	4.71999e-12
Snrnp35	83.4495	24.8919	2.07405	12.0016	3.48655e-33	1.48455e-31
Cep135	83.4313	23.9736	2.97936	8.04656	8.51558e-16	1.47564e-14
Ccdc17	83.3126	23.7433	3.40467	6.97373	3.08642e-12	4.32072e-11
Gm26902	83.2224	26.7129	2.59816	10.2815	8.53932e-25	2.46887e-23
Sdr16c6	83.1992	25.7114	2.48676	10.3393	4.67755e-25	1.37172e-23
Gm7467	82.7965	25.6735	1.63779	15.6757	2.21894e-55	2.56163e-53
Zfp758	82.7747	11.006	2.27147	4.84531	1.26413e-06	1.0715e-05
Gpr6	82.6366	26.7299	3.17263	8.42516	3.60272e-17	6.84932e-16
Zbtb3	82.3029	25.5802	4.01168	6.37642	1.81274e-10	2.19958e-09
Arhgef37	82.1106	18.0435	2.40064	7.5161	5.64342e-14	8.77728e-13
Lpar2	81.9402	37.9746	3.86269	9.83111	8.27035e-23	2.12835e-21
Fosl2	81.9206	25.5792	2.01544	12.6916	6.57917e-37	3.31853e-35
Tmem185b	81.0878	23.3879	2.76215	8.4673	2.51147e-17	4.83223e-16
Cbx8	80.8687	25.9622	2.32595	11.162	6.2587e-29	2.19229e-27
Atp6v0c-ps2	80.5997	4.60858	0.614197	7.50342	6.21758e-14	9.63373e-13
Slc44a4	80.5396	24.2541	3.20553	7.56634	3.839e-14	6.02804e-13
Rps7-ps3	80.4364	3.69786	0.341868	10.8166	2.87164e-27	9.24848e-26
Wdr4	80.0947	25.7274	2.40587	10.6936	1.09035e-26	3.43073e-25
Plagl2	79.9992	8.1604	1.58462	5.14975	2.60839e-07	2.38746e-06
E130309D02Rik	79.6841	26.5642	2.11056	12.5863	2.51046e-36	1.23958e-34
Slc66a2	79.632	23.9739	2.61849	9.1556	5.40562e-20	1.20564e-18
Apobec3	79.3605	25.196	2.33744	10.7793	4.31177e-27	1.38052e-25
Zfp709	78.8026	23.5363	2.93407	8.02172	1.04272e-15	1.79551e-14
Lyn	78.5732	23.6258	2.67065	8.84646	9.03392e-19	1.89136e-17
9430038I01Rik	78.4496	25.3294	1.67178	15.1512	7.44347e-52	7.30663e-50
Slc25a18	78.3693	25.0241	1.83472	13.6392	2.3405e-42	1.49875e-40
Pdp1	78.0837	21.5533	2.64651	8.14406	3.82245e-16	6.81103e-15
Bmp2k	77.8652	6.05752	1.5612	3.88003	0.000104444	0.000725179
Gm47585	77.712	26.0266	1.84064	14.14	2.15221e-45	1.58212e-43
Gm48582	77.6342	23.646	2.56351	9.22405	2.86098e-20	6.48686e-19
Gm14295	77.5716	7.20202	1.69616	4.24607	2.17555e-05	0.000162521
Arhgef10l	77.5616	25.5629	1.74245	14.6706	9.94306e-49	8.10929e-47
1700003E16Rik	77.4659	27.5862	3.10416	8.88685	6.28649e-19	1.33761e-17
Il6ra	77.4403	23.0845	2.67365	8.63408	5.92005e-18	1.18495e-16
6330403K07Rik	77.4354	24.4601	2.85096	8.57961	9.51968e-18	1.88464e-16
Arhgap44	77.1947	6.56353	1.68495	3.89539	9.80409e-05	0.000682166
Dsel	77.1922	25.8134	2.62941	9.8172	9.49476e-23	2.43199e-21
1700007K13Rik	77.1055	25.4805	2.35012	10.8422	2.17209e-27	7.06489e-26
A130012E19Rik	76.7701	21.7564	2.10532	10.334	4.947e-25	1.44815e-23
Plch1	75.9211	23.8118	2.17094	10.9685	5.41904e-28	1.80557e-26
Itgbl1	75.7949	9.84314	1.15037	8.55651	1.16334e-17	2.28939e-16
Tspan15	75.7726	18.084	2.78567	6.49178	8.48305e-11	1.05191e-09
Accs	74.8356	24.2208	2.51753	9.62088	6.52713e-22	1.60178e-20
Ccdc40	74.6865	10.8271	2.23132	4.85233	1.22018e-06	1.0364e-05
Pard6g	74.5107	24.9627	2.69115	9.27586	1.76199e-20	4.0285e-19
Rassf3	74.4647	10.3707	1.64127	6.31873	2.63723e-10	3.16487e-09
Dglucy	74.2418	9.51972	1.82722	5.20994	1.88906e-07	1.75056e-06
Dennd2a	74.1396	11.4158	1.48894	7.66707	1.75976e-14	2.80894e-13
Rtl6	74.0452	11.829	2.02786	5.83327	5.43519e-09	5.83873e-08
Ak8	73.985	26.6434	2.94874	9.03553	1.63207e-19	3.55306e-18
Asb2	73.9134	26.7373	2.13411	12.5285	5.21208e-36	2.56582e-34
1700084E18Rik	73.9049	21.4452	2.53808	8.44939	2.92821e-17	5.60119e-16
1700037C18Rik	73.397	26.159	2.80543	9.32442	1.11589e-20	2.59841e-19
BC052040	73.3023	25.0259	3.41572	7.3267	2.35891e-13	3.52825e-12
Hyal2	73.2423	26.547	3.38152	7.8506	4.14041e-15	6.91178e-14
Chst13	73.0763	26.0555	3.06244	8.50807	1.76856e-17	3.44732e-16
Ralb	73.0601	19.7407	2.118	9.32044	1.15858e-20	2.68636e-19
Pfkfb3	73.0008	17.4806	2.26006	7.73457	1.03751e-14	1.68063e-13
Tmem229b	72.9249	26.0207	2.25909	11.5182	1.06804e-30	4.06228e-29
Arhgef19	72.6996	25.1757	2.87306	8.76269	1.90653e-18	3.92636e-17
Gm42929	72.3616	16.215	3.01695	5.37462	7.67433e-08	7.40902e-07
Reep2	72.2205	11.2105	2.36761	4.73493	2.1913e-06	1.81241e-05
Cfi	72.1617	24.8645	2.57717	9.64799	5.01303e-22	1.23577e-20
A230001M10Rik	72.1385	26.7586	3.05141	8.76924	1.79871e-18	3.70895e-17
Ston2	71.994	11.0049	1.68217	6.5421	6.06621e-11	7.63188e-10
Qrsl1	71.7533	25.1388	2.14728	11.7073	1.16939e-31	4.63039e-30
Gm9847	71.51	5.05117	0.860099	5.87278	4.28547e-09	4.65552e-08
Gm31036	71.4483	17.8278	2.85216	6.25062	4.08822e-10	4.83188e-09
Gm29374	71.2825	9.5738	2.08345	4.59517	4.32389e-06	3.46439e-05
Vav3	71.0439	25.4099	2.20391	11.5295	9.36827e-31	3.57982e-29
Fhad1	71.0074	25.463	1.94655	13.0811	4.22382e-39	2.36318e-37
Sgms2	70.8788	18.5364	4.4029	4.21005	2.55319e-05	0.000189386
1700030C10Rik	70.7846	25.5429	2.46158	10.3766	3.16737e-25	9.37232e-24
Slc22a5	70.5852	9.98677	2.4337	4.10353	4.06898e-05	0.000296325
C2cd4a	70.3308	29.0549	3.07714	9.44217	3.65152e-21	8.71316e-20
Dtx2	70.1029	9.16782	2.20241	4.16263	3.14599e-05	0.000231058
Polr1e	69.8846	25.8758	2.1374	12.1062	9.7965e-34	4.30547e-32
Socs1	69.8536	25.2708	2.56231	9.8625	6.05233e-23	1.56987e-21
Sptlc3	69.822	17.958	2.45144	7.32546	2.38075e-13	3.55766e-12
Gm1965	69.6947	25.7131	3.86216	6.65771	2.78136e-11	3.61004e-10
Snx22	69.6531	24.3355	3.01978	8.05871	7.71054e-16	1.34324e-14
Apba2	69.6109	26.5506	2.38911	11.1132	1.08223e-28	3.75868e-27
5730420D15Rik	69.5666	17.5668	1.72462	10.1859	2.29164e-24	6.48822e-23
Pacrg	69.3363	10.4031	2.49777	4.16493	3.11444e-05	0.000228844
Prr15	69.2543	24.9097	2.18199	11.416	3.47698e-30	1.29442e-28
Slc15a5	69.219	17.0204	2.53651	6.71015	1.94427e-11	2.54572e-10
9330188P03Rik	68.9738	23.7096	2.79818	8.47321	2.3872e-17	4.60934e-16
Ttyh1	68.7911	22.3963	2.27314	9.85255	6.68293e-23	1.7307e-21
Gm4791	68.7516	27.2514	4.16912	6.53649	6.29788e-11	7.9112e-10
Wdr24	68.591	9.14615	2.3196	3.94298	8.04745e-05	0.000566675
Klhl36	68.3845	23.4443	2.51636	9.31676	1.19946e-20	2.77723e-19
Gm15760	68.0874	24.7953	2.44945	10.1228	4.37672e-24	1.21195e-22
Gm35315	68.0292	24.8352	3.28993	7.54886	4.39086e-14	6.87483e-13
Rfc3	67.9705	24.7476	2.26879	10.9079	1.05721e-27	3.46615e-26
Pus7l	67.9148	27.9952	2.80184	9.99171	1.65693e-23	4.41658e-22
Ano6	67.9101	15.6606	2.26826	6.90425	5.04704e-12	6.95847e-11
Dph1	67.6413	25.414	2.60595	9.7523	1.80327e-22	4.54784e-21
Hey2	67.4288	8.68018	2.26001	3.84077	0.000122647	0.000845483
Ccdc126	67.0367	24.5829	3.08201	7.97626	1.50831e-15	2.5756e-14
Slc39a14	66.9451	7.32772	1.81777	4.03116	5.55029e-05	0.000398886
Egln3	66.7056	21.4558	2.68763	7.98316	1.42639e-15	2.44335e-14
Crispld1	66.5806	26.0362	2.62698	9.91108	3.72614e-23	9.77321e-22
Dtx3l	66.3328	19.2373	3.03135	6.34611	2.20821e-10	2.66171e-09
Dhx34	66.2612	25.3203	2.21446	11.4341	2.82511e-30	1.05494e-28
D230025D16Rik	66.0762	25.3611	2.22616	11.3923	4.56695e-30	1.68617e-28
Kif26a	65.6738	9.61087	1.86448	5.15471	2.54025e-07	2.32769e-06
Gm3325	65.5009	15.0918	2.30999	6.53328	6.43462e-11	8.07677e-10
Gm38116	65.4218	22.3425	2.82256	7.91568	2.45906e-15	4.14726e-14
Zbtb8b	65.2968	17.9932	2.3116	7.78387	7.03403e-15	1.16005e-13
Snhg4	65.2155	25.0243	2.28429	10.955	6.28991e-28	2.08726e-26
Tmem176a	65.2138	17.7795	3.0757	5.78062	7.44254e-09	7.87305e-08
Spon1	65.1273	20.4312	2.18477	9.35164	8.63023e-21	2.02108e-19
Ifi202b	65.0818	35.9898	4.86597	7.39622	1.4012e-13	2.1288e-12
Mafa	64.76	10.5061	1.75237	5.99538	2.03012e-09	2.28257e-08
Mrgpre	64.7429	26.9322	2.00713	13.4182	4.72852e-41	2.87091e-39
Elf5	64.4678	17.8609	2.17774	8.20157	2.37275e-16	4.28375e-15
Gm3375	64.438	5.43711	0.94109	5.77746	7.58353e-09	8.0101e-08
Klk1b8	64.3661	26.7843	2.83128	9.46016	3.07467e-21	7.36887e-20
Gprc5b	64.3276	20.8186	1.76122	11.8205	3.05695e-32	1.24349e-30
Gm15454	64.2123	10.2492	1.72906	5.92761	3.07383e-09	3.40238e-08
Pvt1	64.1799	24.759	2.63461	9.39761	5.58167e-21	1.32035e-19
Gm43654	64.0248	25.9212	2.12134	12.2193	2.4532e-34	1.11092e-32
Sirt6	63.9577	6.49046	1.4474	4.48421	7.31841e-06	5.74847e-05
Ism1	63.7924	20.8931	2.03043	10.29	7.81917e-25	2.26466e-23
Nol4	63.774	26.9461	3.00454	8.96846	3.00693e-19	6.48586e-18
Zcwpw1	63.0065	10.6791	2.03356	5.25143	1.50923e-07	1.41862e-06
Gpr61	62.9412	27.5335	2.68215	10.2655	1.0082e-24	2.89954e-23
Hccs	62.9295	8.46404	2.16184	3.9152	9.03293e-05	0.000631458
Syt10	62.7883	35.5007	2.18476	16.2493	2.2603e-59	3.19424e-57
Mpst	62.7049	25.3176	1.80286	14.043	8.50139e-45	6.05927e-43
Rnf225	62.4231	24.9415	3.76308	6.62795	3.40383e-11	4.35589e-10
Lrrc4c	62.311	16.1468	2.83018	5.70522	1.16192e-08	1.20477e-07
Gm38240	62.2908	23.2867	3.66016	6.3622	1.98888e-10	2.40618e-09
Capsl	62.0333	25.9485	2.41395	10.7494	5.96517e-27	1.89878e-25
Nrm	61.8463	24.4082	3.96492	6.15605	7.45811e-10	8.6587e-09
Pbld2	61.8034	24.0243	3.63148	6.61557	3.70115e-11	4.71796e-10
Sat2	61.7815	22.7457	2.68985	8.45614	2.76369e-17	5.29266e-16
A330076H08Rik	61.7529	24.8709	2.7317	9.10456	8.66205e-20	1.91034e-18
Ghdc	61.6782	24.9671	2.6645	9.37026	7.23509e-21	1.69921e-19
Kif9	61.6431	23.5563	1.81591	12.9722	1.7583e-38	9.54431e-37
Kctd14	61.2383	23.9381	2.38426	10.0401	1.0162e-23	2.75347e-22
Crppa	61.236	24.9037	2.68126	9.28805	1.57135e-20	3.60268e-19
5930430L01Rik	61.0862	25.0034	2.39723	10.4301	1.80705e-25	5.38599e-24
Tspan33	60.8762	26.1256	2.81642	9.27617	1.7568e-20	4.02224e-19
Hpdl	60.7535	23.4866	4.0376	5.81698	5.99215e-09	6.39931e-08
Six5	60.3682	26.6064	2.51165	10.5932	3.20453e-26	9.9304e-25
Mrln	59.9969	25.8058	2.91025	8.86721	7.50042e-19	1.58446e-17
Stk33	59.9414	25.7014	3.12434	8.22618	1.93271e-16	3.51252e-15
Chrm4	59.9297	10.2757	2.16908	4.73737	2.16505e-06	1.79341e-05
Mettl1	59.6589	8.14566	1.85866	4.38256	1.17295e-05	9.01039e-05
Tnfrsf4	59.3656	47.0596	4.85987	9.6833	3.55056e-22	8.7922e-21
Gm9887	59.1528	17.9605	3.35074	5.36016	8.31498e-08	8.00397e-07
Epha2	59.0381	24.8201	2.11794	11.719	1.01875e-31	4.06334e-30
Asic3	58.9906	24.6782	3.18331	7.75238	9.01842e-15	1.47544e-13
Zfp729b	58.7332	23.3836	2.53123	9.23802	2.51098e-20	5.72497e-19
Ier5l	58.58	8.47104	1.68617	5.02384	5.06473e-07	4.45898e-06
Ripor1	58.4299	25.4418	1.95733	12.9982	1.25258e-38	6.84449e-37
Trmt61a	58.3962	25.6668	2.89155	8.87649	6.90034e-19	1.45958e-17
Gramd2	58.2594	25.4835	2.59622	9.81562	9.64447e-23	2.45882e-21
Gpm6b	58.0538	23.4147	3.22713	7.25556	3.99997e-13	5.86508e-12
Tspan5	57.9958	24.2069	2.38774	10.138	3.7457e-24	1.0425e-22
Pknox1	57.8732	24.9683	2.3679	10.5445	5.38501e-26	1.63778e-24
Mocos	57.7646	29.2116	2.2145	13.191	9.88025e-40	5.66318e-38
Rab35	57.7509	10.3452	1.78524	5.79482	6.83941e-09	7.27097e-08
Gm17709	57.5529	23.912	1.49427	16.0024	1.22917e-57	1.63819e-55
Tcaf1	57.5443	20.4719	2.56918	7.96823	1.60959e-15	2.74282e-14
Casr	57.5127	9.85126	1.67185	5.89244	3.80541e-09	4.16436e-08
Srbd1	57.3599	24.2448	2.4239	10.0024	1.48722e-23	3.98958e-22
Flot1	57.2062	23.1596	2.84882	8.12956	4.30848e-16	7.64381e-15
Tceal1	57.1795	25.9837	2.74369	9.47034	2.78932e-21	6.69478e-20
Pla2g5	57.0615	15.3732	2.67109	5.75539	8.64414e-09	9.06032e-08
Specc1	56.9506	22.5241	2.69945	8.34394	7.18544e-17	1.33853e-15
Tcea1-ps1	56.8711	4.24548	1.10067	3.85718	0.000114701	0.000793036
Bend6	56.8673	38.8271	3.20279	12.1229	7.98943e-34	3.53021e-32
A230057D06Rik	56.8669	24.4666	2.90423	8.42445	3.62437e-17	6.87665e-16
Dcaf12l1	56.6951	26.1805	3.4015	7.69674	1.39584e-14	2.24334e-13
Morrbid	56.4661	20.1141	4.53601	4.4343	9.23698e-06	7.17639e-05
Slc26a11	56.3623	21.3023	3.24526	6.56411	5.23435e-11	6.63112e-10
Gm20075	56.3473	9.16203	1.0821	8.46686	2.52093e-17	4.84473e-16
Exph5	56.2893	20.6682	4.88972	4.22687	2.3696e-05	0.000176247
Megf10	56.0825	26.7837	3.9267	6.82091	9.04644e-12	1.22157e-10
Rab34	56.0791	23.2664	2.84241	8.18545	2.71284e-16	4.87627e-15
Tlnrd1	56.0713	8.03689	1.43499	5.60067	2.13531e-08	2.16342e-07
Sdk1	55.7365	22.7734	2.19515	10.3744	3.24179e-25	9.57526e-24
Draxin	55.6551	11.6639	2.22672	5.23812	1.62217e-07	1.52042e-06
D1Ertd622e	55.4533	9.82598	2.50145	3.92812	8.56127e-05	0.000601049
D430020J02Rik	55.4222	23.5771	2.8691	8.21758	2.07653e-16	3.76139e-15
Prr12	55.4093	6.19848	1.43435	4.32146	1.54998e-05	0.000117797
Zfp974	55.0639	10.5952	2.24717	4.71491	2.41818e-06	1.98206e-05
Jmjd8	54.9224	8.23517	1.73228	4.75395	1.99476e-06	1.65906e-05
Gm48405	54.8961	28.7172	2.99404	9.59147	8.68423e-22	2.11846e-20
Sowahc	54.3867	23.1252	4.66821	4.95377	7.27875e-07	6.31325e-06
Trim6	54.2795	30.0123	3.19647	9.3892	6.04595e-21	1.42812e-19
AW011738	54.0716	20.3602	2.70658	7.52247	5.3751e-14	8.38383e-13
Tubd1	54.0568	26.4057	2.70694	9.75482	1.75905e-22	4.44315e-21
Lysmd1	53.826	24.2306	1.87018	12.9563	2.16302e-38	1.17025e-36
Urb2	53.4289	24.637	2.33448	10.5535	4.8924e-26	1.49073e-24
Ppfia2	53.3688	24.7269	2.26544	10.9148	9.79102e-28	3.22298e-26
Reep4	53.2985	24.6363	2.7042	9.11038	8.20912e-20	1.81854e-18
Slc35g2	53.1286	23.3367	3.01575	7.73827	1.00779e-14	1.63571e-13
Adamts2	53.0983	20.6138	3.32991	6.19051	5.99708e-10	7.01714e-09
Nmi	52.8867	15.9216	3.39657	4.68755	2.76497e-06	2.25615e-05
Il4ra	52.8679	18.407	2.39668	7.6802	1.58835e-14	2.5378e-13
Ddc	52.8487	21.6522	4.1803	5.17958	2.22385e-07	2.04577e-06
4631405J19Rik	52.8151	24.2609	3.64726	6.65182	2.89487e-11	3.73961e-10
Msrb2	52.7649	18.1231	2.69589	6.72251	1.78623e-11	2.34628e-10
C2cd4c	52.723	8.7188	1.84435	4.7273	2.27529e-06	1.8755e-05
Rnf217	52.6936	25.2402	2.46529	10.2382	1.33707e-24	3.82524e-23
A630052C17Rik	52.3706	23.8173	2.81117	8.47238	2.40423e-17	4.63677e-16
Zfp280b	52.3067	22.8331	2.88155	7.92389	2.30186e-15	3.89416e-14
Lratd1	52.2877	22.6738	3.83195	5.91703	3.27799e-09	3.61615e-08
Cdk18	52.1976	25.9372	3.18931	8.13254	4.20392e-16	7.4664e-15
Mgat3	52.1416	26.3351	1.94574	13.5348	9.74942e-42	6.10008e-40
Iqcg	51.9986	25.2259	2.53257	9.96061	2.26664e-23	6.00275e-22
Dennd2c	51.9395	19.8201	3.3922	5.84283	5.13208e-09	5.53852e-08
Slc9a7	51.6568	25.1281	2.55196	9.84656	7.0929e-23	1.83397e-21
Angptl2	51.5985	24.2005	2.89653	8.35498	6.54433e-17	1.22328e-15
Zbed3	51.5727	22.2991	2.43631	9.15281	5.54689e-20	1.23547e-18
Ubxn10	51.4822	24.4043	3.81292	6.40043	1.54939e-10	1.88421e-09
Nfxl1	51.2959	10.6406	2.61115	4.07506	4.60023e-05	0.000333679
Atic	51.2362	6.53583	1.50714	4.33657	1.44723e-05	0.000110192
Ccdc51	51.2282	25.606	2.98776	8.57027	1.0324e-17	2.03905e-16
Psd4	51.0514	20.3181	4.41155	4.60565	4.11177e-06	3.30575e-05
Foxq1	50.9934	17.0829	2.91576	5.85881	4.6619e-09	5.04106e-08
Rpl23a	50.9648	2.14207	0.351703	6.09057	1.12509e-09	1.29067e-08
Gm26549	50.7414	24.5065	2.91559	8.40534	4.26613e-17	8.06628e-16
Tmem253	50.5594	36.5497	2.86256	12.7682	2.4683e-37	1.28863e-35
Rai14	50.55	16.0518	2.39161	6.71172	1.92347e-11	2.5205e-10
Sobp	50.541	22.3072	2.31639	9.63018	5.96246e-22	1.46541e-20
Adamts5	50.4599	15.0825	3.4451	4.37795	1.19798e-05	9.19406e-05
Ankrd6	50.445	23.7982	3.40119	6.99703	2.61452e-12	3.67265e-11
Gm16046	50.3259	23.2167	2.03372	11.4159	3.48222e-30	1.29442e-28
Gm37018	50.3216	21.0595	3.53939	5.95003	2.68098e-09	2.97962e-08
1110020A21Rik	50.3137	24.0202	2.27084	10.5777	3.78199e-26	1.16538e-24
Arid5b	50.3012	22.8295	2.92502	7.8049	5.95477e-15	9.84038e-14
Ptpre	50.1757	31.4581	2.69303	11.6813	1.58867e-31	6.24533e-30
Tcea3	50.1452	21.3053	2.17028	9.81687	9.5257e-23	2.43611e-21
D030028A08Rik	50.0161	23.0323	3.94142	5.84365	5.1069e-09	5.51498e-08
Adtrp	49.9271	29.7526	4.89776	6.07474	1.24187e-09	1.42165e-08
Rcc1	49.7817	24.9873	2.74794	9.09312	9.62327e-20	2.11184e-18
C330013E15Rik	49.7362	23.6764	2.78959	8.48743	2.11254e-17	4.09349e-16
Pcgf2	49.6523	25.0252	2.10167	11.9073	1.08421e-32	4.51102e-31
Adar	49.5656	19.4503	2.03643	9.55122	1.2818e-21	3.10378e-20
Rita1	49.3593	24.9316	2.27411	10.9632	5.74203e-28	1.90931e-26
Nhlrc3	49.2195	22.7484	2.50302	9.08835	1.0055e-19	2.20364e-18
Nrbp2	49.2055	9.19911	2.31084	3.98086	6.86676e-05	0.000487302
Tgm2	49.1148	26.2588	2.49262	10.5346	5.98073e-26	1.81224e-24
Atp11c	48.9453	22.9782	2.67049	8.60448	7.66661e-18	1.52708e-16
Trim59	48.8933	21.8395	3.98344	5.48257	4.19188e-08	4.15714e-07
Gm17435	48.8767	24.1225	2.86938	8.40686	4.21122e-17	7.97166e-16
N4bp2l1	48.8183	24.4493	3.18097	7.68613	1.51657e-14	2.42784e-13
Lox	48.8021	23.184	3.0805	7.52606	5.22952e-14	8.16453e-13
Tmtc2	48.6226	8.37288	1.80359	4.64235	3.4447e-06	2.79411e-05
Kif3c	48.5697	26.1985	2.12373	12.3361	5.78934e-35	2.68092e-33
Fam214b	48.4343	23.1251	2.82226	8.19382	2.53058e-16	4.56367e-15
Fpgs	48.4083	23.8157	2.88145	8.26519	1.39471e-16	2.55744e-15
Ptpdc1	48.3289	9.57029	2.02796	4.71917	2.36804e-06	1.94291e-05
Tbc1d30	48.2806	10.7409	2.08295	5.15659	2.5149e-07	2.30575e-06
Lrrc75b	48.1329	16.9082	3.03103	5.57837	2.42782e-08	2.44919e-07
Zfp189	48.0742	25.4065	2.98677	8.50634	1.79504e-17	3.49478e-16
Stard5	48.0647	16.0299	2.85995	5.60498	2.08281e-08	2.11154e-07
Gdpd3	47.8278	23.172	2.7136	8.53922	1.35135e-17	2.64985e-16
Best1	47.8101	24.5438	3.02898	8.10298	5.36307e-16	9.43314e-15
Gchfr	47.8015	20.2542	3.98016	5.0888	3.60346e-07	3.23857e-06
Rprm	47.7343	23.6984	3.58071	6.61836	3.63194e-11	4.63695e-10
Fam83b	47.5478	22.6601	2.92706	7.74159	9.81791e-15	1.59509e-13
Nexn	47.2925	23.7492	2.12155	11.1942	4.35084e-29	1.54379e-27
A630089N07Rik	47.163	24.4726	2.66285	9.19041	3.91344e-20	8.77607e-19
Casc1	47.1267	22.9307	2.82996	8.10282	5.36998e-16	9.43517e-15
Gm48700	47.112	29.9539	2.52946	11.842	2.36759e-32	9.67876e-31
Swap70	46.9881	17.59	4.0281	4.36681	1.26074e-05	9.64857e-05
Sipa1l2	46.9117	24.8199	2.2425	11.068	1.79444e-28	6.14117e-27
Galr2	46.7419	25.4018	3.78596	6.70948	1.95321e-11	2.554e-10
D130062J10Rik	46.7095	24.398	2.7527	8.86331	7.76732e-19	1.63663e-17
C630043F03Rik	46.6764	23.4497	2.705	8.66899	4.35971e-18	8.81242e-17
Bend3	46.6513	8.6645	1.78094	4.86512	1.14389e-06	9.73611e-06
Ppil6	46.4462	19.8046	1.96503	10.0785	6.87627e-24	1.88815e-22
Gm37258	46.3113	23.4991	2.59346	9.0609	1.29381e-19	2.82041e-18
Tmem51os1	46.2517	23.0869	2.19	10.542	5.53285e-26	1.67963e-24
Rpp40	46.2321	23.5192	2.89603	8.12119	4.61619e-16	8.17204e-15
Trim12a	46.0792	18.0096	3.11216	5.78684	7.1721e-09	7.61058e-08
Mcmdc2	45.8798	24.6257	2.30339	10.6911	1.1204e-26	3.51853e-25
B3gnt8	45.7096	24.7977	2.44065	10.1603	2.9822e-24	8.38546e-23
Cd274	45.2839	22.8941	4.87774	4.69359	2.68452e-06	2.19269e-05
Fam221a	45.1524	18.8889	3.78189	4.99457	5.89681e-07	5.16656e-06
1700028J19Rik	44.9226	25.0927	3.64829	6.87793	6.07301e-12	8.31009e-11
Il1rap	44.9175	22.6593	2.79494	8.10725	5.17766e-16	9.1266e-15
Slc29a3	44.8254	21.4028	2.62801	8.14408	3.82162e-16	6.81103e-15
Lamb2	44.7956	15.7968	3.40946	4.63323	3.60004e-06	2.91434e-05
Sigirr	44.7768	23.094	3.50091	6.59658	4.20761e-11	5.35107e-10
Pemt	44.7518	24.4975	3.32948	7.35774	1.87056e-13	2.82359e-12
AA414768	44.4511	26.1675	2.6788	9.76839	1.53879e-22	3.89282e-21
Gm7805	44.4318	7.60404	1.92038	3.95966	7.50577e-05	0.000530125
Gm14038	44.2557	22.3014	2.19789	10.1467	3.42675e-24	9.56981e-23
Gabrg3	44.2253	26.3699	3.71626	7.09583	1.28581e-12	1.83289e-11
Dbn1	44.0593	25.1577	3.0597	8.22225	1.99715e-16	3.62159e-15
Plac8	43.9676	26.7941	4.53034	5.91437	3.3315e-09	3.67272e-08
Zfp619	43.8543	24.6095	3.56674	6.89971	5.21091e-12	7.17233e-11
Areg	43.6909	24.5282	3.58068	6.85015	7.37733e-12	1.00279e-10
Sec14l4	43.5308	24.299	4.26923	5.69166	1.25813e-08	1.29877e-07
Pgf	43.2818	25.3172	3.8952	6.49959	8.05397e-11	1.00098e-09
Rps3a2	43.246	6.9364	1.12156	6.18458	6.22692e-10	7.27051e-09
Fadd	43.0421	9.49323	2.1443	4.4272	9.54646e-06	7.39929e-05
Asap2	42.939	22.2131	2.22286	9.99305	1.6347e-23	4.36443e-22
Dcn	42.9375	23.3788	3.91246	5.97547	2.29426e-09	2.56548e-08
Aldh5a1	42.7177	24.2666	2.01699	12.0311	2.43968e-33	1.04696e-31
Nme4	42.7087	24.5882	3.13767	7.83645	4.63466e-15	7.69767e-14
Homez	42.5171	23.5	3.23755	7.25858	3.91175e-13	5.74086e-12
Zfp184	42.2983	26.1624	3.52146	7.42942	1.09073e-13	1.66949e-12
Ifrd2	42.2453	26.0696	2.63217	9.90423	3.99018e-23	1.0449e-21
Gm48181	42.1932	24.4042	2.12244	11.4982	1.34708e-30	5.07646e-29
Ttc38	42.0682	22.7142	2.58965	8.77115	1.76845e-18	3.65115e-17
Xk	41.8353	24.8029	3.06017	8.10507	5.27164e-16	9.28228e-15
Airn	41.7885	23.381	2.40542	9.72012	2.475e-22	6.16607e-21
Cers6	41.7769	24.6654	3.64713	6.76298	1.35186e-11	1.79151e-10
Vps37b	41.5615	7.81297	2.03456	3.84012	0.000122974	0.000847377
BC025920	41.4986	26.2131	2.437	10.7563	5.53384e-27	1.76491e-25
Stat6	41.2764	21.0853	2.53619	8.31378	9.26987e-17	1.71707e-15
Rac3	41.2203	24.6563	2.802	8.79953	1.37387e-18	2.84367e-17
1700101I11Rik	41.2087	20.5127	3.0363	6.75584	1.42013e-11	1.8729e-10
Acaa2	41.1843	25.2012	3.87472	6.50401	7.82087e-11	9.72743e-10
Nlgn2	41.1392	23.5565	1.97767	11.9112	1.0345e-32	4.31515e-31
Snhg10	40.9164	6.58193	1.55908	4.22167	2.425e-05	0.000180286
Pprc1	40.8933	25.2292	2.58191	9.77155	1.49153e-22	3.77908e-21
Rbks	40.8459	25.8649	2.63142	9.82924	8.42486e-23	2.16471e-21
Zbtb33	40.7213	24.6231	2.99338	8.22584	1.93832e-16	3.51882e-15
Hyal3	40.7152	24.7429	2.85793	8.65762	4.81713e-18	9.70113e-17
Gm44103	40.7067	22.8117	2.58146	8.83674	9.85542e-19	2.05286e-17
Plekhh3	40.6482	25.8218	2.93194	8.80705	1.2848e-18	2.66267e-17
Gm17949	40.5874	19.5786	4.35422	4.49647	6.90921e-06	5.43227e-05
Rps6kc1	40.5466	24.8175	3.01333	8.2359	1.78207e-16	3.25318e-15
Junos	40.341	24.7922	2.58766	9.58093	9.61781e-22	2.34272e-20
Rnf24	40.0601	24.5032	2.65098	9.24306	2.39539e-20	5.46904e-19
Cxcl16	39.679	22.6198	3.31737	6.81858	9.1948e-12	1.23956e-10
Grin2c	39.601	25.9517	3.22363	8.05045	8.24869e-16	1.43242e-14
Gm11423	39.4823	23.8328	3.49585	6.81746	9.26672e-12	1.2472e-10
Lama2	39.3919	22.1849	3.56228	6.22771	4.73317e-10	5.56605e-09
Tnnt2	39.3861	20.9155	2.14548	9.74866	1.86916e-22	4.69956e-21
Gm48182	39.02	24.4664	2.15815	11.3367	8.63058e-30	3.15806e-28
Tead4	38.8409	24.7976	1.96933	12.5919	2.33932e-36	1.15856e-34
Afg1l	38.8211	24.3879	2.75665	8.84691	8.99743e-19	1.88612e-17
Gm9776	38.5689	7.09956	1.81377	3.91426	9.06824e-05	0.000633656
Gm44699	38.5412	34.894	2.07766	16.7949	2.661e-63	4.36218e-61
Rasgrf1	38.301	25.7594	3.62399	7.10802	1.17721e-12	1.68541e-11
Snx20	38.2319	24.7863	2.23364	11.0968	1.30035e-28	4.47827e-27
Tram2	38.1119	23.8172	2.75663	8.63999	5.62201e-18	1.12667e-16
Mocs3	37.9168	7.8814	1.95007	4.04159	5.30905e-05	0.000382051
Cd79b	37.8553	26.2406	2.84058	9.23777	2.51693e-20	5.73057e-19
Cenpj	37.6148	23.309	2.47214	9.42865	4.15396e-21	9.89766e-20
Samd5	37.6098	24.4941	3.68907	6.63963	3.14474e-11	4.05281e-10
Tert	37.4665	24.6836	3.19871	7.71674	1.19345e-14	1.92941e-13
Micall1	37.3934	22.0155	2.07915	10.5887	3.36344e-26	1.04032e-24
Rnf224	37.3876	24.6902	3.71171	6.65196	2.89212e-11	3.739e-10
Krt33a	37.3828	23.8813	4.67024	5.11351	3.16222e-07	2.86558e-06
Gm6969	37.3303	7.3759	1.37935	5.34739	8.92336e-08	8.56444e-07
Snhg16	37.3137	24.6462	2.59483	9.49821	2.13538e-21	5.13275e-20
Klk1b9	37.2855	26.1668	3.43109	7.62637	2.41456e-14	3.83917e-13
Cd3g	37.0961	24.3167	3.36033	7.23642	4.60693e-13	6.7425e-12
Irf8	37.0675	24.4639	2.49479	9.80601	1.06077e-22	2.70018e-21
Npas2	37.0605	23.3633	2.39675	9.74789	1.88346e-22	4.72826e-21
Kitl	36.9219	24.4628	3.80853	6.42316	1.33474e-10	1.62921e-09
Gm14150	36.9024	5.40871	0.684071	7.90665	2.64409e-15	4.45473e-14
Tmem82	36.7911	22.5856	2.44705	9.22974	2.71297e-20	6.15978e-19
Mansc1	36.7807	22.7816	2.44022	9.33589	1.00147e-20	2.33862e-19
Kndc1	36.7377	24.5743	2.21866	11.0762	1.63656e-28	5.61259e-27
Usp12	36.6344	23.3779	2.10647	11.0981	1.28149e-28	4.42262e-27
Chst5	36.5759	17.4061	3.08858	5.63563	1.74418e-08	1.78368e-07
Pmel	36.4957	36.5725	2.68632	13.6143	3.29145e-42	2.09948e-40
Sdcbp2	36.3308	27.2059	2.98326	9.11951	7.54663e-20	1.67404e-18
E2f1	36.3198	25.8431	2.75933	9.36569	7.5552e-21	1.77185e-19
Itpripl1	36.2064	18.2379	2.68639	6.789	1.12911e-11	1.50729e-10
Ccdc71l	36.167	10.3414	2.54783	4.05889	4.93075e-05	0.000356235
Pask	36.1493	21.8275	2.83028	7.71215	1.23715e-14	1.99415e-13
Itgb4	36.0896	25.2326	3.12767	8.06754	7.17291e-16	1.25091e-14
Col13a1	36.0824	22.8138	3.09787	7.36435	1.7801e-13	2.69448e-12
Pcdh17	36.0504	19.8613	2.97017	6.68693	2.27899e-11	2.97211e-10
Gm7046	35.8347	9.61842	2.09933	4.58167	4.61272e-06	3.6886e-05
4930506C21Rik	35.7503	25.4547	1.79539	14.1778	1.25671e-45	9.27983e-44
Map3k20	35.6635	21.0223	2.9823	7.04904	1.80162e-12	2.54823e-11
Nmral1	35.4591	26.6043	3.60169	7.38661	1.50621e-13	2.28623e-12
Pcbd1	35.1683	26.0205	3.04981	8.53184	1.44042e-17	2.81775e-16
Pgbd5	35.1492	24.8841	2.89927	8.58288	9.25267e-18	1.83631e-16
Gm44045	35.1375	18.4275	2.65743	6.93435	4.08099e-12	5.65987e-11
Gm34455	35.057	21.6958	2.43334	8.91605	4.8323e-19	1.03415e-17
Aifm2	34.921	24.688	2.79246	8.84095	9.49077e-19	1.97942e-17
Gm10130	34.9117	26.3906	2.971	8.88272	6.52452e-19	1.38545e-17
Gm904	34.6895	25.5246	2.97328	8.58466	9.11048e-18	1.81248e-16
Efna2	34.5995	23.9342	2.82375	8.47601	2.3304e-17	4.50498e-16
Gnas	34.5192	2.70274	0.517687	5.2208	1.78156e-07	1.66127e-06
Tspan1	34.4541	28.0385	4.49663	6.23544	4.50501e-10	5.30917e-09
Dlgap3	34.2687	11.4507	2.45178	4.67035	3.00684e-06	2.44864e-05
Gm47882	34.1097	8.37485	1.6122	5.19466	2.05097e-07	1.89417e-06
Atp10a	33.9173	20.4586	2.7968	7.31502	2.57335e-13	3.83849e-12
Zfp760	33.8867	25.6329	2.68079	9.56169	1.15854e-21	2.81361e-20
6030443J06Rik	33.8004	25.7236	2.2978	11.1949	4.32049e-29	1.53635e-27
Peli3	33.7898	24.7929	3.06154	8.09819	5.57839e-16	9.78038e-15
Smtn	33.767	24.3735	2.77157	8.79414	1.44152e-18	2.97994e-17
Adora1	33.7603	25.8945	3.23382	8.00741	1.17145e-15	2.01507e-14
Pdss1	33.7392	23.754	2.51545	9.44324	3.61411e-21	8.63645e-20
Zfp3	33.7197	22.6224	3.31195	6.83054	8.45979e-12	1.14613e-10
Gm17098	33.7146	35.1794	2.66799	13.1857	1.06029e-39	6.0562e-38
Apold1	33.5626	24.9491	3.86274	6.45891	1.05461e-10	1.29694e-09
Gm15327	33.5145	25.9344	2.61201	9.92888	3.11745e-23	8.18979e-22
Lrp5	33.5081	8.17504	1.59105	5.13813	2.77493e-07	2.52579e-06
Gm48092	33.3648	24.8168	3.88308	6.39101	1.64795e-10	2.00259e-09
Gm45338	32.862	22.5509	4.4588	5.05762	4.2452e-07	3.78215e-06
Rpl28-ps1	32.845	2.15489	0.512007	4.20871	2.56832e-05	0.000190423
Gm3226	32.8402	3.29365	0.619484	5.31676	1.05633e-07	1.00853e-06
Zfp383	32.7706	16.0561	3.83131	4.19076	2.78017e-05	0.000205572
Nppc	32.7311	22.4608	3.22265	6.96966	3.17705e-12	4.43624e-11
2010109A12Rik	32.4424	22.9579	3.55685	6.45457	1.08524e-10	1.33261e-09
Klk1b26	32.3497	23.0312	3.22527	7.14087	9.27421e-13	1.33713e-11
Klf16	32.344	8.11749	1.60825	5.04739	4.47891e-07	3.97095e-06
C130013H08Rik	32.288	26.0702	2.83328	9.2014	3.53311e-20	7.96676e-19
Lin9	32.1759	23.7474	3.40712	6.96995	3.17049e-12	4.43085e-11
Gm45847	32.0764	15.7068	2.87004	5.47268	4.43268e-08	4.38798e-07
Soga1	32.066	24.2625	2.31655	10.4736	1.14272e-25	3.4309e-24
Lamc1	32.0159	23.8519	3.37495	7.06736	1.57912e-12	2.24126e-11
Cyth4	32.015	25.84	4.12531	6.26377	3.75769e-10	4.467e-09
Zfp882	31.9886	25.622	3.04117	8.42506	3.60579e-17	6.84932e-16
Tmem158	31.8553	23.8829	4.16363	5.73607	9.68998e-09	1.01177e-07
Pigl	31.7543	20.9823	2.07447	10.1145	4.76229e-24	1.31428e-22
Gm49760	31.7143	16.6816	2.21074	7.54569	4.49884e-14	7.03045e-13
Tle6	31.6723	24.8205	3.59831	6.89781	5.28094e-12	7.26262e-11
Mrm2	31.5417	24.8881	2.97003	8.37975	5.30399e-17	9.95971e-16
Fastkd5	31.4868	24.0821	2.77053	8.69224	3.55363e-18	7.20082e-17
Polh	31.116	8.62332	1.92449	4.48084	7.43502e-06	5.83448e-05
Gm12892	31.0838	6.38241	0.816641	7.81544	5.47705e-15	9.07839e-14
Ablim1	31.026	24.8198	3.20782	7.73727	1.01577e-14	1.64703e-13
A830018L16Rik	30.978	26.0024	4.60009	5.65259	1.58052e-08	1.62036e-07
Smim6	30.918	21.7874	2.63865	8.25701	1.49369e-16	2.73281e-15
Gm42888	30.8847	25.856	4.50989	5.73319	9.85619e-09	1.02847e-07
Rwdd3	30.8479	24.4653	2.56487	9.53861	1.44764e-21	3.49501e-20
Rab6b	30.7103	25.4054	2.50375	10.1469	3.41894e-24	9.56429e-23
Slc25a48	30.3796	25.7685	3.38516	7.61221	2.69443e-14	4.2638e-13
Gm44005	30.3025	25.7152	3.61902	7.10558	1.19823e-12	1.71251e-11
Gm43445	30.128	25.4905	2.99113	8.52202	1.5679e-17	3.05983e-16
Zfp763	29.9959	21.9521	4.86185	4.51517	6.32662e-06	4.99578e-05
Pax2	29.9892	9.23932	1.79758	5.13987	2.74924e-07	2.50678e-06
9930012K11Rik	29.9035	22.1832	3.04257	7.29095	3.07779e-13	4.566e-12
Tceal3	29.8954	25.3173	2.60933	9.70259	2.93932e-22	7.30065e-21
6030400A10Rik	29.6072	37.5856	3.29761	11.3978	4.28652e-30	1.58621e-28
Gm11346	29.508	25.7997	3.28762	7.84753	4.24322e-15	7.06901e-14
Nkpd1	29.496	23.1207	4.15267	5.56767	2.58168e-08	2.598e-07
Neurod2	29.4006	23.0748	2.72743	8.46027	2.66758e-17	5.12057e-16
Lrp4	29.3722	20.8977	3.20797	6.51428	7.30371e-11	9.11185e-10
Gm16016	29.1852	22.9414	3.15442	7.27276	3.52227e-13	5.18318e-12
Myo5b	29.101	19.8515	3.38824	5.85893	4.65869e-09	5.04092e-08
Mansc4	29.05	16.2756	3.57247	4.55584	5.21771e-06	4.15414e-05
Agbl4	29.023	24.5778	2.75423	8.92365	4.51161e-19	9.66783e-18
Rapgef3	28.9583	24.2616	4.62737	5.24307	1.57925e-07	1.48189e-06
Zfp568	28.9537	25.5156	3.56001	7.16728	7.65001e-13	1.10881e-11
Hap1	28.7421	24.4704	3.79067	6.45543	1.07911e-10	1.32607e-09
Slc22a4	28.5771	25.6697	4.59285	5.58907	2.28295e-08	2.30872e-07
Gm32815	28.3314	21.9404	3.05207	7.18869	6.54173e-13	9.49855e-12
Stox1	28.1351	26.4448	2.83194	9.33806	9.81114e-21	2.29435e-19
Paqr3	27.9791	27.366	3.312	8.26266	1.42458e-16	2.60928e-15
Haus6	27.7099	24.8433	3.68682	6.73839	1.60155e-11	2.11047e-10
Nek3	27.4975	25.3149	2.92732	8.64779	5.25044e-18	1.05478e-16
Stamos	27.3938	23.1237	2.5219	9.16916	4.76707e-20	1.06467e-18
Fzd5	27.3918	23.9675	2.74998	8.71552	2.89428e-18	5.90123e-17
Gm43457	27.2675	24.1663	3.21425	7.51849	5.54142e-14	8.63503e-13
Pantr2	27.2206	25.2791	2.53358	9.97763	1.90976e-23	5.07402e-22
Aldh1b1	27.1487	24.0927	3.72332	6.47077	9.75018e-11	1.20357e-09
Il17d	27.068	24.6208	2.50632	9.8235	8.919e-23	2.28809e-21
Slco2a1	27.0135	18.0304	2.79075	6.46076	1.04178e-10	1.28212e-09
Gm50269	27.0062	23.2448	3.40945	6.81776	9.24703e-12	1.24558e-10
Gm3724	26.9861	3.15354	0.668154	4.71978	2.36098e-06	1.93905e-05
Plxdc2	26.9563	21.727	4.08084	5.32414	1.0143e-07	9.69533e-07
Gm37407	26.9269	24.5495	3.10925	7.89565	2.88802e-15	4.85075e-14
Ovca2	26.8523	25.1167	2.7901	9.00206	2.2152e-19	4.8034e-18
Irx3os	26.8405	19.1689	2.6713	7.17588	7.18411e-13	1.0422e-11
Gm16045	26.7472	31.0719	3.06156	10.149	3.3462e-24	9.39286e-23
Gm16701	26.6796	25.9855	2.99905	8.66456	4.53269e-18	9.13952e-17
Ttc21a	26.6067	22.5388	3.75619	6.00044	1.96779e-09	2.21552e-08
Gm38393	26.5537	20.6337	2.37139	8.70112	3.28625e-18	6.68381e-17
Gm37706	26.3384	24.2894	3.03962	7.99095	1.33908e-15	2.29859e-14
Gm10647	26.2305	39.2528	2.65101	14.8068	1.32469e-49	1.14293e-47
Wdr59	26.1022	24.3837	2.66641	9.14479	5.9748e-20	1.32897e-18
Prdm16	26.0476	21.7307	3.27069	6.64406	3.05161e-11	3.93588e-10
Zfp93	26.0285	14.0236	3.57126	3.9268	8.60818e-05	0.000603825
Gm47076	25.936	25.2473	3.05328	8.2689	1.35206e-16	2.482e-15
Grk5	25.9326	24.9675	2.9999	8.32279	8.59183e-17	1.59689e-15
Gm47725	25.8871	25.1627	4.60081	5.46919	4.52106e-08	4.47007e-07
Gm9800	25.8609	2.9854	0.495028	6.03076	1.63194e-09	1.84754e-08
Dnaic1	25.8572	24.9517	2.64833	9.42168	4.43907e-21	1.05463e-19
3110039M20Rik	25.849	15.2824	3.30373	4.6258	3.73157e-06	3.01636e-05
3000002C10Rik	25.7625	25.2407	3.76196	6.70944	1.95371e-11	2.554e-10
Gm43062	25.6314	23.279	2.32067	10.0312	1.11204e-23	3.00819e-22
Zgrf1	25.6176	22.3325	2.75233	8.11404	4.89637e-16	8.64938e-15
Tmem144	25.4907	15.0795	3.60891	4.1784	2.93571e-05	0.000216585
Srrm4os	25.471	23.1022	2.81308	8.21241	2.16795e-16	3.91832e-15
Lzts3	25.393	23.0133	3.7724	6.10045	1.05771e-09	1.21507e-08
Zik1	25.2635	24.9772	3.10575	8.04225	8.82068e-16	1.5269e-14
Gm29443	25.2132	21.1349	3.36798	6.27525	3.49066e-10	4.1586e-09
Lum	25.0134	16.0965	2.93803	5.47866	4.28568e-08	4.24502e-07
Cdhr3	24.8528	23.8489	3.25076	7.33642	2.19381e-13	3.28731e-12
Eaf2	24.7565	22.5049	4.43172	5.07815	3.81133e-07	3.41416e-06
Hjv	24.67	26.4039	4.00532	6.59221	4.33338e-11	5.50248e-10
Rassf7	24.6148	22.4544	2.9101	7.71602	1.2002e-14	1.93841e-13
Cenpw	24.6064	24.9401	4.02465	6.19684	5.76092e-10	6.75044e-09
Zfp286	24.5032	24.7189	3.25257	7.5998	2.9658e-14	4.68385e-13
Chit1	24.3748	24.5383	4.10274	5.98095	2.2184e-09	2.48573e-08
Mis18a	24.3579	23.13	2.98657	7.74468	9.58196e-15	1.55985e-13
Gm16794	24.3109	25.3315	2.67812	9.45871	3.11753e-21	7.46069e-20
Gm4675	24.2971	20.758	4.29248	4.83591	1.3254e-06	1.12054e-05
Pycr1	24.181	24.3199	3.577	6.79899	1.05358e-11	1.41336e-10
Zdhhc9	24.1524	17.4256	2.98473	5.83825	5.2753e-09	5.67814e-08
Lrriq3	23.7835	30.3132	4.46771	6.78496	1.16122e-11	1.54889e-10
Notch3	23.7149	23.6258	2.35817	10.0187	1.26149e-23	3.40124e-22
B230317F23Rik	23.5989	24.7445	4.33033	5.71421	1.10213e-08	1.14422e-07
5730507A11Rik	23.559	24.1366	2.6996	8.94083	3.86263e-19	8.29884e-18
Gm26550	23.5443	40.7011	3.56616	11.4131	3.59558e-30	1.33354e-28
A730011C13Rik	23.5027	22.7679	3.36958	6.75689	1.40985e-11	1.86234e-10
Ankrd37	23.221	21.9505	3.01937	7.2699	3.59744e-13	5.28904e-12
Ccpg1	23.152	6.82689	1.78745	3.81935	0.000133804	0.000916609
Gm44243	23.1101	38.8819	2.24076	17.3521	1.90186e-67	3.80211e-65
Nlrp6	23.0901	25.8591	4.52237	5.71803	1.07766e-08	1.12023e-07
Pdpn	23.0745	26.0866	2.87698	9.06735	1.21943e-19	2.66181e-18
Zfp607b	23.0631	16.7172	3.33929	5.00621	5.55108e-07	4.86885e-06
Gm15708	23.0511	18.6318	2.68265	6.9453	3.77654e-12	5.24651e-11
G630022F23Rik	22.7824	6.0177	1.30921	4.59643	4.29784e-06	3.44689e-05
Pdk4	22.7583	16.6761	3.76336	4.43118	9.37184e-06	7.27772e-05
Map7d2	22.7091	22.6494	4.0908	5.53666	3.08303e-08	3.08171e-07
Cd46	22.6846	23.5532	3.23743	7.27528	3.45715e-13	5.0965e-12
Svopl	22.6486	23.7265	3.50369	6.77186	1.2714e-11	1.69035e-10
1700055D18Rik	22.5263	21.4683	3.45196	6.21916	4.99837e-10	5.87371e-09
Ranbp17	22.387	24.9341	2.85539	8.73229	2.49573e-18	5.10131e-17
Lypd1	22.3353	25.4865	2.77022	9.20017	3.5737e-20	8.04721e-19
Gm37390	22.3005	25.551	3.19929	7.98646	1.38874e-15	2.38133e-14
Rnf144b	22.0417	14.7457	2.69934	5.46271	4.68925e-08	4.6252e-07
Mesp2	22.0124	25.3664	4.85999	5.21942	1.79482e-07	1.67021e-06
4933431K14Rik	21.8591	24.7673	3.37246	7.34397	2.07347e-13	3.11553e-12
Grasp	21.8571	25.555	2.96309	8.62444	6.44047e-18	1.28441e-16
Gm19327	21.8194	14.3481	2.83712	5.05727	4.25309e-07	3.78713e-06
F830208F22Rik	21.8053	19.0296	3.66526	5.19189	2.08174e-07	1.9206e-06
Klhl5	21.7271	24.1664	3.28477	7.3571	1.87947e-13	2.83442e-12
Rbm38	21.515	7.61379	1.33962	5.68355	1.31928e-08	1.36019e-07
Dok4	21.5113	24.9557	4.04459	6.17015	6.82259e-10	7.94902e-09
Gm49377	21.48	15.4569	1.99431	7.7505	9.1533e-15	1.49601e-13
Mxd3	21.4361	25.2661	3.32818	7.59155	3.16104e-14	4.98739e-13
Gm44044	21.4325	17.0338	2.69117	6.32953	2.45917e-10	2.95551e-09
Mamdc4	21.2502	21.8607	2.96884	7.36338	1.79316e-13	2.71175e-12
Gm50464	21.2279	21.5239	3.23442	6.65464	2.83997e-11	3.67737e-10
Klk1b11	21.0826	22.4503	4.86288	4.61666	3.89957e-06	3.14595e-05
Morn5	21.0278	24.8316	3.67151	6.76332	1.34865e-11	1.78871e-10
Grk4	20.8733	22.9869	3.30394	6.95742	3.46566e-12	4.8269e-11
Pla2g15	20.8451	25.9331	4.52794	5.72734	1.02019e-08	1.06386e-07
Gm10226	20.7885	23.705	2.85988	8.28884	1.1436e-16	2.10405e-15
B230208H11Rik	20.7437	24.4812	3.53858	6.91836	4.56911e-12	6.31546e-11
Nalcn	20.7401	15.0953	2.92493	5.16092	2.45737e-07	2.25426e-06
Alpk1	20.6637	22.7243	2.59725	8.74934	2.14598e-18	4.40841e-17
Eef1akmt4	20.6035	23.2125	2.87248	8.08098	6.42472e-16	1.12522e-14
Ppp1r3b	20.5165	22.6716	2.91623	7.77427	7.58819e-15	1.24767e-13
Steap3	20.4685	24.8079	4.1283	6.00924	1.864e-09	2.103e-08
Dipk1a	20.3766	18.1152	3.43151	5.27907	1.29843e-07	1.22469e-06
Tspyl5	20.3582	22.8503	2.9488	7.74903	9.25944e-15	1.51035e-13
Gstcd	20.3234	22.4285	2.63099	8.52475	1.53145e-17	2.99227e-16
Zfp449	20.3212	23.9375	4.59843	5.20557	1.93399e-07	1.78915e-06
Gm12602	20.3195	33.2067	2.96757	11.1899	4.57023e-29	1.61814e-27
Gm11737	20.2146	24.0657	2.50637	9.60181	7.85564e-22	1.91919e-20
Lrrc19	19.9319	23.5422	3.13405	7.51175	5.83436e-14	9.05707e-13
1010001B22Rik	19.8281	25.2613	3.4909	7.23631	4.61072e-13	6.7425e-12
2810455O05Rik	19.823	23.0331	2.5935	8.88108	6.62164e-19	1.40425e-17
Pip5k1b	19.7832	25.1507	3.26859	7.69465	1.41886e-14	2.2781e-13
9930104L06Rik	19.6961	24.332	2.89638	8.40084	4.43311e-17	8.36271e-16
Ccno	19.6132	23.2671	4.02504	5.78058	7.44417e-09	7.87305e-08
Piezo1	19.5279	17.8379	2.85336	6.25155	4.06402e-10	4.80674e-09
Foxo6	19.4992	24.9073	2.99512	8.31596	9.10147e-17	1.68779e-15
Kdm8	19.498	25.1443	2.59499	9.68954	3.34045e-22	8.28442e-21
Reps2	19.4582	20.0194	3.98427	5.0246	5.04476e-07	4.44617e-06
Fat1	19.3562	22.9424	2.88225	7.95988	1.72202e-15	2.93136e-14
Kctd8	19.354	19.9464	3.93394	5.07033	3.97119e-07	3.55154e-06
Acot11	19.3044	28.8848	4.76043	6.06768	1.29768e-09	1.48347e-08
Gm50292	19.1384	24.3863	3.57987	6.81208	9.62009e-12	1.29264e-10
Il15	19.0415	40.8506	4.86168	8.40257	4.36826e-17	8.24988e-16
Gm11437	19.0153	27.3116	4.05607	6.73352	1.65607e-11	2.18056e-10
Dusp4	18.8716	18.7987	3.58749	5.24006	1.60524e-07	1.50542e-06
Samd12	18.7734	26.2438	4.85996	5.40001	6.66377e-08	6.47151e-07
Cyp11a1	18.7581	21.6535	3.08293	7.02367	2.16119e-12	3.04368e-11
Pop1	18.7394	18.7261	3.42911	5.46094	4.73622e-08	4.66872e-07
Gm11827	18.7163	34.9499	3.98983	8.75976	1.9567e-18	4.02462e-17
Cd72	18.6962	18.8014	3.68794	5.09807	3.4313e-07	3.09232e-06
Plekha2	18.6093	26.0126	4.896	5.31304	1.07813e-07	1.02695e-06
Gm3791	18.501	18.2921	3.87435	4.72135	2.34287e-06	1.92611e-05
Syt9	18.1733	30.2079	4.42941	6.81985	9.11336e-12	1.22959e-10
Fam184b	18.148	23.44	3.75078	6.24935	4.12153e-10	4.86424e-09
Arid3a	18.1161	21.7126	2.90709	7.46884	8.09055e-14	1.24534e-12
Sec22c	18.1034	22.0059	3.73155	5.89724	3.69636e-09	4.04773e-08
4933431E20Rik	18.0627	16.8657	3.82152	4.41334	1.01786e-05	7.86691e-05
Svop	18.0116	23.0675	3.2322	7.13677	9.5547e-13	1.37395e-11
Bex1	17.9788	24.0819	3.38095	7.12284	1.05727e-12	1.51768e-11
Rbfox1	17.9488	24.4796	4.86019	5.03676	4.73483e-07	4.18201e-06
Gm47817	17.9249	22.142	2.62792	8.42566	3.58729e-17	6.83001e-16
Gm6166	17.9058	7.5204	1.62961	4.61485	3.9337e-06	3.17048e-05
0610040J01Rik	17.8329	23.4797	3.53728	6.6378	3.18404e-11	4.10023e-10
A930019D19Rik	17.6918	20.7772	3.85681	5.38714	7.15895e-08	6.93597e-07
Gpd1	17.6534	23.8819	2.78789	8.56632	1.06841e-17	2.10763e-16
Cd36	17.6456	28.7629	4.896	5.87476	4.23447e-09	4.60621e-08
4930549G23Rik	17.4483	25.0758	3.25153	7.71198	1.23876e-14	1.99479e-13
C4a	17.3506	24.911	4.02884	6.18317	6.28268e-10	7.33038e-09
Camk4	17.2651	24.4008	2.84923	8.56399	1.09024e-17	2.1481e-16
Sirpa	17.2557	22.5431	3.61759	6.23153	4.61915e-10	5.43978e-09
Tap2	17.2305	18.2115	3.70407	4.91661	8.80558e-07	7.56155e-06
Sorcs1	17.0683	25.2144	4.67968	5.38807	7.12183e-08	6.90409e-07
Gm47513	16.8712	33.4993	3.36369	9.95912	2.30095e-23	6.08378e-22
Slc24a2	16.8607	25.4429	3.23966	7.85357	4.04369e-15	6.7572e-14
Gm2762	16.8595	24.5779	4.86011	5.05706	4.25759e-07	3.78907e-06
1810021B22Rik	16.8531	24.1301	3.43029	7.03444	2.00067e-12	2.82003e-11
Dhx35	16.7814	24.1447	2.69564	8.95694	3.33819e-19	7.18149e-18
Rab44	16.773	25.0112	4.86005	5.14628	2.65709e-07	2.42661e-06
4921511C10Rik	16.7549	19.9344	4.89861	4.06941	4.71328e-05	0.000340974
Gm49284	16.7089	23.3382	3.06343	7.61834	2.56957e-14	4.07773e-13
Adgre5	16.6631	16.6058	3.39276	4.89448	9.85681e-07	8.43615e-06
Cetn4	16.4578	23.9915	3.70983	6.467	9.99669e-11	1.23308e-09
Osgin1	16.278	30.6723	4.87562	6.29095	3.15527e-10	3.77e-09
Gm10101	16.198	28.8328	4.88093	5.90723	3.47898e-09	3.82501e-08
Hspa1a	16.1352	21.9103	4.19072	5.22829	1.71088e-07	1.599e-06
Ccdc142os	16.1335	22.6026	3.07551	7.34921	1.99378e-13	3.00128e-12
Ssc4d	16.1078	24.1015	3.30956	7.2824	3.27939e-13	4.8519e-12
Tdg-ps2	16.0364	23.3135	2.47319	9.42651	4.23942e-21	1.00866e-19
Fam161b	16.0354	10.0073	2.51086	3.98562	6.73045e-05	0.000477836
Gm49699	16.0071	21.4287	3.18719	6.72336	1.77576e-11	2.33441e-10
Gm11240	16.0055	25.1972	4.33524	5.81217	6.16663e-09	6.58136e-08
Ovol1	15.9025	23.3868	4.8606	4.8115	1.49801e-06	1.25997e-05
Gm37052	15.8887	24.2551	4.07643	5.95007	2.68023e-09	2.97962e-08
Xylb	15.8731	20.3538	3.78254	5.381	7.40726e-08	7.16385e-07
Rnps1-ps	15.7856	5.05594	1.29948	3.89073	9.99439e-05	0.000694523
Prickle1	15.7268	22.2392	3.61204	6.15697	7.41508e-10	8.61484e-09
Asprv1	15.5971	26.7932	4.89746	5.47083	4.47933e-08	4.43148e-07
Gm7879	15.569	6.93298	1.54783	4.47916	7.49356e-06	5.87761e-05
Gm48261	15.4796	26.0702	4.85999	5.36425	8.12841e-08	7.83357e-07
D930048N14Rik	15.4052	38.3149	4.86003	7.88368	3.17876e-15	5.32816e-14
Itga2	15.3837	25.5059	4.86002	5.24811	1.53669e-07	1.44278e-06
Tnfrsf23	15.2973	23.8805	3.46616	6.88961	5.59445e-12	7.68089e-11
Gm35576	15.2811	23.0542	4.47772	5.14866	2.62359e-07	2.40003e-06
Gm34655	15.2327	24.802	3.37689	7.34461	2.06358e-13	3.10351e-12
Gm26813	15.2136	22.4864	3.27118	6.87409	6.23848e-12	8.52228e-11
Trpv4	15.204	22.5361	3.2731	6.88524	5.76919e-12	7.90094e-11
Gm49326	15.1739	4.85069	1.1094	4.37235	1.22918e-05	9.42029e-05
Gm10617	15.158	24.7428	4.05989	6.09445	1.09816e-09	1.26065e-08
Gm6345	15.1542	18.6723	4.20813	4.4372	9.11352e-06	7.08383e-05
2810021J22Rik	15.0546	23.1117	4.86065	4.75486	1.98583e-06	1.65331e-05
Gm13830	14.9964	23.9277	3.04101	7.86834	3.59377e-15	6.01765e-14
Ap1s2	14.983	24.3199	4.08023	5.96042	2.51594e-09	2.80188e-08
Ulk4	14.8057	19.0101	3.77881	5.03072	4.88654e-07	4.30904e-06
Gm17971	14.7947	23.2006	3.48131	6.66434	2.65861e-11	3.45894e-10
Gm20681	14.7942	24.5995	2.83165	8.68734	3.71033e-18	7.50906e-17
Gm45413	14.7941	18.4823	3.08307	5.99475	2.03793e-09	2.28977e-08
4930533B01Rik	14.7919	23.217	3.09831	7.49343	6.70955e-14	1.03764e-12
Far2	14.6954	23.2657	2.78552	8.35239	6.68968e-17	1.24902e-15
Rnaset2a	14.6569	23.9164	3.51793	6.79843	1.05769e-11	1.41772e-10
B130055M24Rik	14.5051	23.6493	3.31255	7.13932	9.37965e-13	1.34996e-11
Tnfrsf9	14.2067	18.6103	4.87926	3.81416	0.000136646	0.000934515
Ninj2	14.1567	19.5083	4.00101	4.87585	1.08342e-06	9.24066e-06
Gm7665	14.1263	19.2889	2.36954	8.14035	3.94124e-16	7.01506e-15
9430091E24Rik	14.116	24.5506	4.86019	5.05136	4.38675e-07	3.89555e-06
Eif4ebp1	14.1147	24.2612	4.86027	4.99174	5.98391e-07	5.23448e-06
Tnfrsf22	14.0436	16.5895	3.66899	4.52156	6.13853e-06	4.84959e-05
Gm42690	14.0308	24.3539	3.99929	6.08956	1.13222e-09	1.29793e-08
4831440D22Rik	13.9828	22.5267	3.02005	7.45905	8.71484e-14	1.34017e-12
AL928616.1	13.9628	20.4303	3.56869	5.72489	1.03503e-08	1.07866e-07
Piga	13.8869	22.1185	3.47102	6.37233	1.86182e-10	2.25579e-09
Gm45435	13.8482	21.887	3.37482	6.48538	8.85096e-11	1.0967e-09
Abhd3	13.7527	23.3862	3.47534	6.72918	1.70616e-11	2.24472e-10
Zfp808	13.7372	19.8216	2.57975	7.68353	1.54762e-14	2.47514e-13
Gm15634	13.7182	15.8378	3.26972	4.84378	1.27392e-06	1.07868e-05
Abi3bp	13.713	14.454	3.06639	4.71367	2.43293e-06	1.99315e-05
Calr3	13.6414	16.4339	4.14108	3.96851	7.23236e-05	0.000512139
Elavl4	13.5581	24.8133	4.86012	5.1055	3.29919e-07	2.98474e-06
Rps15a-ps5	13.5235	3.94444	0.797803	4.94412	7.64866e-07	6.60962e-06
Gm43172	13.2919	41.2026	4.87245	8.45624	2.76147e-17	5.29266e-16
B3gnt7	13.2479	24.5497	4.54999	5.39555	6.83155e-08	6.6266e-07
Zpbp	13.2467	16.1846	2.87106	5.63713	1.72909e-08	1.76935e-07
Abcc4	13.2046	18.1345	3.8403	4.72215	2.33367e-06	1.91951e-05
Xaf1	13.1614	20.2807	4.80599	4.21989	2.44419e-05	0.000181548
Gm48998	13.1307	24.6548	4.48221	5.50059	3.78528e-08	3.76529e-07
Elk3	13.0819	7.74786	1.97258	3.92778	8.57328e-05	0.000601634
Gm36951	13.0212	24.1681	3.99105	6.05557	1.39922e-09	1.59398e-08
Gm43200	13.0076	24.7985	2.84275	8.72345	2.69858e-18	5.50907e-17
Gk5	12.9672	22.6588	3.74199	6.05528	1.40173e-09	1.59573e-08
Apbb1ip	12.9653	31.4943	3.62199	8.6953	3.459e-18	7.01774e-17
Gm22107	12.8201	24.0208	3.32868	7.21633	5.34102e-13	7.79656e-12
Gm5294	12.8131	25.4509	4.8601	5.2367	1.63476e-07	1.53135e-06
Htr6	12.6926	21.3952	3.0893	6.92558	4.34207e-12	6.00671e-11
Zfp229	12.5676	14.6055	3.64442	4.00764	6.13281e-05	0.000438635
Gm23864	12.429	20.6255	3.35449	6.14863	7.81539e-10	9.05426e-09
Krt79	12.3895	40.3317	4.86006	8.29861	1.05339e-16	1.94244e-15
Adam33	12.382	23.1654	4.12233	5.61949	1.91522e-08	1.9525e-07
Gm43268	12.3643	23.7804	3.97253	5.98622	2.1478e-09	2.40992e-08
Plppr2	12.3632	22.4306	3.84328	5.83631	5.3368e-09	5.74056e-08
Gm50454	12.339	24.6333	3.77056	6.53307	6.44358e-11	8.08184e-10
Pcdhac2	12.2448	25.7168	4.38819	5.86045	4.6161e-09	5.00143e-08
Fancb	12.2216	16.9955	3.74074	4.54334	5.53687e-06	4.39545e-05
Gm44633	12.2149	21.3721	2.85908	7.47515	7.71157e-14	1.18812e-12
Gpsm1	12.1722	17.9412	3.79634	4.72593	2.29069e-06	1.887e-05
Gm13132	12.124	24.2138	3.12077	7.75892	8.56541e-15	1.40413e-13
Lrp3	12.0646	25.4215	4.86005	5.23072	1.68854e-07	1.57992e-06
Sh3bp2	12.0155	22.0944	3.72089	5.93794	2.88628e-09	3.20344e-08
Gm4617	11.9782	4.78346	0.729089	6.56088	5.34923e-11	6.76098e-10
Gm42725	11.9271	16.8809	3.55509	4.74838	2.05049e-06	1.70282e-05
Lyrm7	11.9235	23.8589	4.17086	5.72038	1.06284e-08	1.10553e-07
Gm35909	11.8831	23.7166	4.65461	5.09529	3.48207e-07	3.13635e-06
Thtpa	11.8621	23.8583	4.71623	5.05876	4.21994e-07	3.76374e-06
Gm32585	11.8297	20.3459	4.86347	4.18341	2.87166e-05	0.00021205
Lrrn4cl	11.8171	29.4471	4.096	7.18923	6.51555e-13	9.47522e-12
Izumo1	11.8092	23.296	3.54604	6.56959	5.0454e-11	6.3967e-10
Adcy10	11.8005	23.7528	3.61905	6.56326	5.26445e-11	6.66411e-10
Gm8186	11.7025	4.39581	0.941038	4.67123	2.994e-06	2.4394e-05
Stk26	11.6847	24.9806	4.86017	5.13986	2.74946e-07	2.50678e-06
Ngb	11.6437	36.3883	4.8601	7.48715	7.03831e-14	1.08746e-12
5430403G16Rik	11.5711	18.5735	2.93352	6.33147	2.42843e-10	2.92071e-09
Gm16070	11.4942	24.7128	4.86008	5.08485	3.67919e-07	3.30121e-06
Arl4d	11.4499	24.5284	4.51072	5.43781	5.39407e-08	5.29174e-07
Rps18-ps3	11.3754	6.22723	1.01743	6.12052	9.32703e-10	1.07675e-08
Gm17733	11.3548	24.4203	4.8605	5.02424	5.05418e-07	4.45207e-06
AI506816	11.3317	15.203	3.96743	3.83194	0.000127137	0.000873863
Ccn2	11.2303	17.297	3.43257	5.03908	4.67765e-07	4.13373e-06
Gm49025	11.2044	24.2234	4.78875	5.0584	4.22793e-07	3.76882e-06
Pde8b	11.1858	23.4596	2.73439	8.57948	9.53068e-18	1.88464e-16
Tent5b	11.0779	21.7105	3.92712	5.52834	3.23272e-08	3.2274e-07
Gm15853	10.9938	22.351	4.82593	4.63144	3.63132e-06	2.93677e-05
Cybrd1	10.9034	32.0141	4.39664	7.28149	3.30151e-13	4.87583e-12
Spata5l1	10.8238	21.7986	4.86226	4.48321	7.35274e-06	5.77267e-05
Tmem177	10.8176	24.7061	4.88972	5.05267	4.35672e-07	3.87308e-06
Sfxn5	10.7766	19.2018	2.51329	7.64011	2.17028e-14	3.45412e-13
Gm14964	10.6739	23.9544	3.52591	6.7938	1.09215e-11	1.46153e-10
Gm43201	10.5954	23.2959	4.86101	4.7924	1.64802e-06	1.38118e-05
Tmem130	10.5591	23.2927	3.51499	6.62667	3.43344e-11	4.39035e-10
D830036C21Rik	10.5499	26.782	3.80424	7.04003	1.92198e-12	2.71378e-11
Rps12-ps9	10.5293	3.88708	0.822904	4.72361	2.31693e-06	1.90766e-05
Gpr171	10.4865	22.4948	3.94735	5.69871	1.20721e-08	1.24935e-07
Etaa1os	10.4842	24.3603	2.9374	8.29316	1.10283e-16	2.03132e-15
Tox2	10.4794	28.086	4.88466	5.74983	8.9332e-09	9.33941e-08
Ttc41	10.3963	20.8684	3.5803	5.82866	5.5874e-09	5.99047e-08
Gm47920	10.3727	22.4256	4.89861	4.57796	4.69529e-06	3.7528e-05
Gm49474	10.3301	35.3431	4.86907	7.25869	3.90843e-13	5.74086e-12
Cd59a	10.3009	17.4519	3.68634	4.7342	2.19916e-06	1.81797e-05
Gm30015	10.2097	25.2076	4.86011	5.18663	2.1413e-07	1.97425e-06
4930513N20Rik	10.165	22.3066	4.01288	5.55875	2.71717e-08	2.72765e-07
Gm45797	10.1642	18.3605	4.60577	3.98642	6.70773e-05	0.000476691
Ears2	10.1353	17.6059	3.6827	4.7807	1.74684e-06	1.46101e-05
Pfkfb4	10.063	21.9045	4.86175	4.50547	6.62271e-06	5.21451e-05
3222401L13Rik	10.0527	34.674	4.86412	7.12852	1.01451e-12	1.45757e-11
Ranbp3l	10.0091	22.276	4.84427	4.59842	4.25698e-06	3.41747e-05
Col4a6	9.97207	25.7353	4.89637	5.256	1.47223e-07	1.38464e-06
Gm16246	9.9127	25.0491	4.8602	5.15393	2.55089e-07	2.33613e-06
Rbl1	9.83462	22.8564	4.32272	5.2875	1.23997e-07	1.17293e-06
Plekhd1os	9.82651	28.6353	4.84613	5.9089	3.44392e-09	3.79154e-08
Slc7a11	9.80189	6.0324	1.10343	5.46694	4.5786e-08	4.52424e-07
Gm15972	9.77044	23.7905	3.04814	7.80492	5.95412e-15	9.84038e-14
Arhgap29	9.59851	16.5851	3.20824	5.16954	2.34671e-07	2.15637e-06
4930503L19Rik	9.58004	25.2947	4.44177	5.69475	1.23555e-08	1.27707e-07
Ntf5	9.57556	47.2487	3.44243	13.7254	7.15447e-43	4.67264e-41
Stx19	9.53694	29.3422	4.87552	6.01827	1.76293e-09	1.99171e-08
Gm45629	9.5368	20.5366	3.46604	5.92507	3.12156e-09	3.44823e-08
Gm15344	9.52417	23.3592	3.25941	7.16669	7.6833e-13	1.11265e-11
Gm11821	9.51572	20.764	4.88718	4.24867	2.1504e-05	0.000160819
Fibcd1	9.49556	22.6329	4.06911	5.56212	2.66521e-08	2.67714e-07
Hmga1b	9.43779	5.14594	1.1773	4.37096	1.23702e-05	9.4759e-05
9330162012Rik	9.31388	23.0715	4.4496	5.18508	2.15923e-07	1.98856e-06
Gm37423	9.30747	20.797	3.98098	5.22408	1.75024e-07	1.63392e-06
Gm49463	9.29915	21.3982	4.06616	5.2625	1.42106e-07	1.33882e-06
Lin28a	9.25496	23.375	4.86069	4.80899	1.51698e-06	1.27527e-05
Irf7	9.18832	20.3548	4.79386	4.24601	2.17613e-05	0.000162521
Hmgn2-ps1	9.18099	3.39366	0.599017	5.66537	1.46704e-08	1.50779e-07
Gstt2	9.17009	21.8447	4.3408	5.03242	4.84324e-07	4.27316e-06
Cdc42ep5	9.13942	30.5415	4.4219	6.90686	4.95484e-12	6.84286e-11
Slc1a2	9.04318	25.3117	4.8601	5.20807	1.90816e-07	1.76726e-06
Tmem140	9.02962	17.0837	2.57686	6.62966	3.36464e-11	4.31248e-10
Gm43372	9.02688	21.1454	4.77877	4.42486	9.65056e-06	7.47645e-05
Arrb2	8.95395	22.3519	3.0313	7.3737	1.6596e-13	2.5144e-12
Snai2	8.91625	22.7799	4.86098	4.68628	2.78215e-06	2.26905e-05
Cercam	8.89031	39.535	3.58187	11.0375	2.51836e-28	8.51205e-27
Gm45094	8.83045	22.2048	4.8614	4.56759	4.93373e-06	3.93379e-05
Abcd1	8.80295	18.0619	3.52881	5.11841	3.08123e-07	2.79373e-06
Slc10a7	8.70322	24.6281	2.79464	8.8126	1.22278e-18	2.53735e-17
Galnt4	8.69696	22.2345	3.54464	6.27271	3.54822e-10	4.22411e-09
Rwdd2a	8.63848	23.3969	4.04539	5.78359	7.31215e-09	7.74842e-08
Gm37718	8.61963	16.686	2.61552	6.37961	1.7754e-10	2.15586e-09
1810062O18Rik	8.57755	20.0218	3.70709	5.40096	6.6284e-08	6.44876e-07
Lrig3	8.57598	19.7816	4.87031	4.06167	4.87228e-05	0.000352166
Gm9484	8.57309	32.4981	4.89861	6.63414	3.26398e-11	4.1933e-10
Arhgef26	8.49088	16.5238	3.48301	4.74411	2.09423e-06	1.73563e-05
Iqsec2	8.38528	17.6649	3.31761	5.3246	1.01176e-07	9.6767e-07
Gm12406	8.3021	21.9537	4.32929	5.07097	3.9579e-07	3.54158e-06
Rgma	8.29984	35.569	3.058	11.6315	2.85209e-31	1.1132e-29
Mob3a	8.23038	23.3033	3.84264	6.0644	1.32448e-09	1.51199e-08
Shb	8.19465	29.9427	4.16499	7.18914	6.51989e-13	9.47522e-12
Glo1-ps	8.17667	5.4441	0.985756	5.52277	3.33699e-08	3.32947e-07
Gm15413	8.17625	23.1107	3.52623	6.55394	5.60392e-11	7.07198e-10
Gm39326	8.14846	21.681	2.79063	7.76919	7.89902e-15	1.29748e-13
Gm37864	8.13048	32.236	4.86072	6.63193	3.31315e-11	4.25314e-10
Galnt17	8.0671	24.5198	4.86018	5.04504	4.53427e-07	4.01786e-06
Nhlh1	8.0603	24.1419	4.86039	4.96708	6.79695e-07	5.91728e-06
Cysrt1	8.02426	5.46519	1.39341	3.92217	8.77548e-05	0.000614246
Gm9260	7.96479	6.16424	0.907489	6.79263	1.10109e-11	1.47228e-10
Fsip1	7.96169	24.3929	4.86032	5.01879	5.19986e-07	4.57303e-06
Gm44647	7.90167	23.4315	4.89861	4.78331	1.72434e-06	1.44294e-05
Cep72	7.88598	20.7808	3.29722	6.30251	2.92864e-10	3.50176e-09
Dnajb3	7.84085	22.8731	4.83457	4.73116	2.23237e-06	1.84266e-05
Rpl17-ps3	7.80557	2.18296	0.427229	5.10956	3.22907e-07	2.92454e-06
Copz2	7.77199	23.4752	4.46079	5.26257	1.42053e-07	1.33882e-06
Ccr6	7.75291	25.2798	4.86016	5.20143	1.97759e-07	1.82846e-06
Gm36756	7.72382	23.4923	4.75573	4.93978	7.8209e-07	6.74779e-06
Gm10451	7.67767	18.0298	3.79826	4.74687	2.06588e-06	1.71387e-05
2010016I18Rik	7.61973	48.9117	4.57116	10.7001	1.01716e-26	3.20658e-25
Gm13502	7.59735	5.05263	1.14437	4.41521	1.0091e-05	7.80659e-05
1700095J03Rik	7.55329	24.3822	3.74549	6.50975	7.52771e-11	9.38416e-10
Gm6793	7.46521	3.21229	0.824612	3.89551	9.79914e-05	0.000682111
Gm4356	7.45392	17.8831	3.069	5.827	5.64328e-09	6.04248e-08
Zfp940	7.38295	16.341	3.70196	4.41414	1.01414e-05	7.8419e-05
Pde11a	7.37113	24.0569	4.8603	4.94967	7.43404e-07	6.4379e-06
Oasl1	7.3704	24.003	4.89776	4.90081	9.54443e-07	8.18315e-06
Krt8-ps	7.35542	5.20703	1.00818	5.1648	2.40696e-07	2.21049e-06
Gm21814	7.33718	23.8551	4.88315	4.8852	1.03324e-06	8.82641e-06
Tsnaxip1	7.31766	22.0895	4.86185	4.54344	5.53433e-06	4.39545e-05
Slc52a3	7.26199	18.8313	4.87244	3.86485	0.000111157	0.000769184
Ldhb-ps	7.22907	3.03167	0.572632	5.29427	1.19496e-07	1.13428e-06
Gad1	7.21164	21.6659	4.89861	4.42287	9.73977e-06	7.542e-05
Ang4	7.19989	20.8896	4.87094	4.28861	1.79799e-05	0.000135577
Gm5091	7.19066	23.4263	4.55617	5.14166	2.72318e-07	2.48558e-06
Tsix	7.09681	21.5804	3.62701	5.94992	2.68282e-09	2.97964e-08
Speg	7.00998	35.1233	4.16987	8.42311	3.66609e-17	6.94778e-16
Cenpa	6.86754	27.7793	4.8936	5.67666	1.37349e-08	1.41356e-07
Arpin	6.8644	24.3677	4.89555	4.97753	6.44002e-07	5.61549e-06
Tnfrsf19	6.76552	17.8132	3.00271	5.9324	2.98546e-09	3.30904e-08
Osbpl10	6.72778	20.8379	3.71593	5.60772	2.05005e-08	2.0809e-07
Gm38251	6.7211	18.6352	3.4339	5.42685	5.73584e-08	5.6203e-07
Gm10335	6.64547	2.39167	0.425651	5.61885	1.92238e-08	1.95615e-07
2610037D02Rik	6.60974	20.559	3.94301	5.21402	1.84787e-07	1.7153e-06
2810029C07Rik	6.50851	23.4112	4.86071	4.81641	1.46166e-06	1.2313e-05
Gm3379	6.35329	2.08309	0.542932	3.83674	0.000124681	0.000858417
Sh3tc2	6.3159	28.0112	4.1063	6.82152	9.00808e-12	1.21739e-10
Gm43290	6.27183	24.2567	4.00795	6.05215	1.42929e-09	1.62373e-08
Mesp1	6.0928	27.5281	4.86023	5.66396	1.47923e-08	1.51936e-07
Gm43138	6.05656	24.411	4.14621	5.88755	3.91965e-09	4.2808e-08
Zfp54	6.0369	24.0065	4.86039	4.93921	7.84384e-07	6.76011e-06
BB218582	5.96522	18.8361	4.88828	3.85331	0.00011653	0.000805003
1700040D17Rik	5.95155	27.4476	4.86208	5.64524	1.64949e-08	1.69001e-07
Wbscr25	5.91454	16.9515	3.40098	4.98432	6.21812e-07	5.43356e-06
Pdia5	5.90867	21.0024	4.86383	4.31808	1.57392e-05	0.000119506
Gm12351	5.90479	21.2778	4.89861	4.34364	1.40139e-05	0.000106752
Zfp275	5.90016	18.6426	4.2408	4.396	1.10263e-05	8.49407e-05
Gm7160	5.88534	20.577	4.86592	4.2288	2.34941e-05	0.000174825
Gm16209	5.79007	15.1361	2.4469	6.18582	6.17789e-10	7.2184e-09
Sdr42e1	5.76006	32.5447	4.88909	6.6566	2.80235e-11	3.6344e-10
Gm42600	5.69792	22.9926	3.38597	6.79055	1.1171e-11	1.49247e-10
Serpini1	5.67562	20.9703	4.86465	4.31076	1.62694e-05	0.000123246
Katnal2	5.65817	23.6484	4.233	5.58667	2.31467e-08	2.33936e-07
Gm20404	5.64158	25.4608	4.86388	5.23466	1.65285e-07	1.54741e-06
Riox1	5.6104	18.6258	3.76598	4.9458	7.58332e-07	6.55723e-06
Gm45200	5.60763	29.1618	4.86026	6.00006	1.97248e-09	2.21928e-08
Rab11b-ps2	5.59475	4.51727	0.913359	4.94578	7.58403e-07	6.55723e-06
B230216N24Rik	5.5467	27.9363	4.19845	6.65396	2.85318e-11	3.69157e-10
Slc3a1	5.51407	20.5415	4.36634	4.70451	2.54477e-06	2.08165e-05
Gm3734	5.44646	33.7352	4.89861	6.8867	5.71033e-12	7.82688e-11
Krtap16-1	5.42114	21.7443	4.86163	4.47265	7.72575e-06	6.05103e-05
Gm7502	5.30768	24.2197	4.86032	4.98316	6.25552e-07	5.46333e-06
9130024F11Rik	5.27271	24.5618	4.86055	5.05328	4.34278e-07	3.86279e-06
Pfn4	5.27034	23.5879	4.86135	4.85213	1.2214e-06	1.03689e-05
2700078F05Rik	5.25264	20.8082	4.86499	4.27713	1.89321e-05	0.000142364
Rsad1	5.23232	23.7165	4.86051	4.87943	1.06393e-06	9.08387e-06
B230369F24Rik	5.22854	22.2859	4.89861	4.54943	5.37909e-06	4.27774e-05
H3f3c	5.20904	3.06079	0.672795	4.54937	5.38077e-06	4.27774e-05
Gm49971	5.16151	22.0132	4.86196	4.52765	5.96443e-06	4.72115e-05
Gm38309	5.11846	18.8565	3.80966	4.94966	7.43424e-07	6.4379e-06
Mtag2	5.11827	20.9962	4.86308	4.31747	1.57826e-05	0.00011978
Omp	5.09159	27.6766	4.87553	5.67664	1.37364e-08	1.41356e-07
Dnajb5	5.06438	29.9014	4.86036	6.1521	7.64618e-10	8.87075e-09
Rubcnl	5.06207	22.204	4.86614	4.56295	5.04389e-06	4.01966e-05
Gimap9	4.99957	28.6714	4.74959	6.0366	1.57397e-09	1.78314e-08
Xrra1	4.97212	24.0871	4.86038	4.9558	7.20316e-07	6.251e-06
Calca	4.93766	24.5412	4.86032	5.04929	4.43463e-07	3.93382e-06
Cox4i2	4.93728	18.8048	3.60224	5.22031	1.78623e-07	1.66373e-06
Rps15a-ps3	4.87263	3.42974	0.648557	5.28827	1.2348e-07	1.16938e-06
Pard3b	4.86221	21.5326	4.86356	4.42734	9.54029e-06	7.39801e-05
Tln2	4.84995	30.0038	4.89359	6.13125	8.71902e-10	1.00798e-08
Gm36028	4.82764	19.9607	3.45042	5.78502	7.25044e-09	7.688e-08
Napepld	4.7871	24.2645	4.86037	4.99231	5.96606e-07	5.22445e-06
Serpinb8	4.76535	21.5924	4.87654	4.42782	9.51892e-06	7.38494e-05
Dleu2	4.72568	36.2458	4.86055	7.45715	8.84158e-14	1.35839e-12
Fer1l6	4.68807	21.7451	4.26191	5.1022	3.35724e-07	3.03391e-06
Map10	4.54974	17.8911	3.94701	4.53283	5.81994e-06	4.61192e-05
Tmprss4	4.5129	22.5994	4.89861	4.61343	3.96074e-06	3.19058e-05
Gpx8	4.49421	23.7641	4.89861	4.85119	1.22721e-06	1.04075e-05
Gm14022	4.49299	25.5601	4.896	5.22061	1.78338e-07	1.66202e-06
Prdm9	4.41568	18.5702	3.70267	5.01534	5.29393e-07	4.64828e-06
Marchf4	4.40698	23.7759	4.86143	4.89073	1.00462e-06	8.58642e-06
Nr5a1	4.36885	19.653	4.8698	4.03568	5.44442e-05	0.000391449
Mfsd6l	4.30461	23.1395	4.86049	4.76073	1.92894e-06	1.60758e-05
Eef1aknmt	4.27874	18.5938	4.2165	4.40978	1.03476e-05	7.99382e-05
Gm9292	4.27133	20.5095	3.42676	5.98511	2.16247e-09	2.42472e-08
Gm16267	4.26886	21.2266	4.864	4.36402	1.27693e-05	9.76796e-05
1700029I15Rik	4.19272	35.5409	4.86075	7.31181	2.63575e-13	3.92798e-12
Magi2	4.18669	16.7015	4.09023	4.08326	4.44085e-05	0.000322261
Prkd3	4.14806	17.3972	3.50729	4.96031	7.03798e-07	6.12062e-06
Ptprd	4.10819	17.49	4.34513	4.0252	5.6928e-05	0.000408769
Clic3	4.10145	25.9392	4.87654	5.31918	1.04237e-07	9.95782e-07
Nefh	4.10053	23.4764	4.46459	5.25836	1.45347e-07	1.36857e-06
Gm13245	4.06971	25.9982	4.60876	5.64104	1.69025e-08	1.73068e-07
Gm21321	4.05561	24.1262	4.89798	4.92576	8.40351e-07	7.22384e-06
Armcx6	4.03554	19.8967	4.63333	4.29426	1.75275e-05	0.000132226
Acacb	3.96977	21.9054	4.20003	5.21554	1.83282e-07	1.70229e-06
Gm41293	3.94255	40.0425	4.88972	8.18912	2.6315e-16	4.73525e-15
Gm2531	3.92711	26.6298	4.89861	5.4362	5.44286e-08	5.33641e-07
Creb3l3	3.87987	23.8662	4.86175	4.90898	9.15522e-07	7.85767e-06
Zdbf2	3.86785	18.3741	4.1851	4.39037	1.13156e-05	8.7088e-05
1700061A03Rik	3.82696	16.9308	3.57929	4.73022	2.24278e-06	1.85032e-05
Chia1	3.82124	24.029	4.86046	4.94376	7.66283e-07	6.61838e-06
Ung	3.80322	27.4042	4.8807	5.6148	1.9679e-08	2.00123e-07
Ifi203	3.78381	19.111	4.87773	3.918	8.92857e-05	0.000624695
Gm15601	3.74554	20.4729	4.65438	4.39863	1.08934e-05	8.40354e-05
Gm47251	3.72432	21.3482	4.86409	4.38893	1.13908e-05	8.76253e-05
Tlr2	3.70865	19.8665	4.89861	4.05555	5.00168e-05	0.000360883
5830444F18Rik	3.70228	29.9112	4.89798	6.10685	1.01615e-09	1.16978e-08
Gm22358	3.69926	24.8132	4.89861	5.06535	4.07647e-07	3.63973e-06
Optn	3.6957	19.5533	4.14313	4.71945	2.36486e-06	1.94127e-05
9330159F19Rik	3.69222	19.2486	4.85999	3.96062	7.47543e-05	0.00052821
Kcnn1	3.69186	24.0919	4.86048	4.95669	7.17058e-07	6.22602e-06
Gm49309	3.68589	19.3735	4.87624	3.97304	7.09602e-05	0.000502918
Gm44668	3.64313	20.9566	4.89861	4.27806	1.88526e-05	0.000141896
Gm43753	3.57957	20.5939	4.86374	4.23417	2.29398e-05	0.000170855
Gm7067	3.54652	26.5332	4.86051	5.45894	4.78985e-08	4.71591e-07
Dnah7a	3.51366	23.9027	4.40872	5.4217	5.90343e-08	5.77416e-07
Tpm3-rs7	3.50153	3.77714	0.884266	4.2715	1.94166e-05	0.000145807
Gm45124	3.49256	24.7767	4.87597	5.08138	3.74698e-07	3.35835e-06
Nek2	3.48586	23.963	4.86052	4.93012	8.21789e-07	7.06799e-06
Shisa9	3.48171	27.0789	4.86052	5.57119	2.52999e-08	2.54756e-07
Rps2-ps13	3.47737	5.04252	0.902143	5.58949	2.27739e-08	2.30452e-07
Sez6l	3.4671	41.178	4.86133	8.47051	2.44313e-17	4.70626e-16
C3ar1	3.46419	23.5904	4.86057	4.85342	1.21351e-06	1.03127e-05
Tigd3	3.45445	17.0432	3.18395	5.35284	8.65828e-08	8.32464e-07
Mxra7	3.37491	23.4753	3.72416	6.30351	2.90988e-10	3.48187e-09
Kcnmb2	3.37398	22.6982	4.86077	4.66967	3.01686e-06	2.45558e-05
Gm5481	3.36506	21.3926	4.86417	4.39799	1.09257e-05	8.42449e-05
Smim24	3.35512	27.1173	4.896	5.53867	3.04785e-08	3.05027e-07
Tmem74b	3.32915	17.3276	4.50001	3.85057	0.000117843	0.000813731
Gm42843	3.31006	19.3697	4.88063	3.96869	7.22693e-05	0.000511975
Psmb10	3.28368	22.5689	4.86111	4.64275	3.4381e-06	2.79014e-05
Psmb9	3.27626	19.2103	4.87496	3.9406	8.12774e-05	0.000572082
Gm15559	3.24188	33.5241	4.89861	6.84359	7.72312e-12	1.04892e-10
Gm5837	3.23735	4.40671	1.11313	3.95883	7.53171e-05	0.0005315
Gm15927	3.1962	16.3274	4.12728	3.95596	7.62264e-05	0.000537223
4933423P22Rik	3.18599	19.0715	3.57109	5.34053	9.26759e-08	8.87922e-07
Med18	3.07216	40.3025	4.37156	9.21925	2.99175e-20	6.76465e-19
Gm27653	3.06745	19.7612	3.95865	4.99189	5.9791e-07	5.23307e-06
Gm8130	3.05017	4.37856	1.06254	4.12086	3.77463e-05	0.000275869
Dlec1	3.04327	18.169	4.56624	3.97899	6.92089e-05	0.000490931
Gm14029	2.96596	27.7374	4.86064	5.70653	1.15301e-08	1.19628e-07
Gm49979	2.94058	23.6981	4.86065	4.87549	1.08539e-06	9.25261e-06
Emp2	2.93655	29.5583	4.87171	6.06733	1.30054e-09	1.48569e-08
Clstn3	2.92234	21.0931	4.86449	4.33613	1.45011e-05	0.00011036
Gm13404	2.90419	23.0829	4.86097	4.74862	2.04814e-06	1.70173e-05
Scnn1g	2.88906	25.0576	4.87774	5.13713	2.78967e-07	2.53498e-06
Gm25360	2.87905	25.5051	4.89798	5.20727	1.91639e-07	1.77388e-06
Hectd2	2.79665	18.8674	4.87571	3.86967	0.000108985	0.000754789
S100a2	2.68258	29.2525	4.87399	6.00176	1.95185e-09	2.19909e-08
Zfp14	2.64878	23.4122	4.03958	5.79569	6.80413e-09	7.23817e-08
Dio1	2.64508	18.7504	4.88582	3.83771	0.000124187	0.000855376
Gm42447	2.61576	21.0396	3.65508	5.75625	8.60017e-09	9.02e-08
Ntm	2.57942	19.1736	4.88313	3.9265	8.61923e-05	0.000604342
Map3k21	2.52821	23.0437	4.10788	5.60964	2.02751e-08	2.05929e-07
2310026L22Rik	2.47812	32.3494	4.86085	6.65508	2.83138e-11	3.66915e-10
Sbk2	2.43034	28.0071	4.86082	5.7618	8.32211e-09	8.762e-08
Rps15a-ps7	2.41326	3.32631	0.78657	4.22888	2.34857e-05	0.000174825
Ribc2	2.38786	24.932	4.89861	5.08961	3.58806e-07	3.2265e-06
Gm49658	2.34555	23.2533	4.55341	5.10679	3.27684e-07	2.96616e-06
Gm7729	2.33831	4.56102	1.17014	3.89784	9.70535e-05	0.000676157
Il2ra	2.32379	27.01	4.86087	5.55662	2.75043e-08	2.75766e-07
Efcab8	2.27972	34.8458	4.89861	7.11342	1.13205e-12	1.62218e-11
Ifi203-ps	2.26439	24.8578	4.88973	5.08368	3.70197e-07	3.31982e-06
Gm45854	2.1756	25.7319	4.86095	5.29361	1.19927e-07	1.13771e-06
Efemp1	2.16615	23.3155	4.86096	4.79649	1.61473e-06	1.35536e-05
Erich6	2.15907	20.9594	4.86483	4.30836	1.64467e-05	0.000124359
Hspb8	2.15146	23.1113	4.86099	4.75445	1.9899e-06	1.65586e-05
Ubap1l	2.14759	36.099	4.86134	7.42573	1.1216e-13	1.71515e-12
Gm37176	2.10445	28.7038	4.86097	5.90496	3.5274e-09	3.87046e-08
4430402I18Rik	2.08706	23.1174	4.861	4.7557	1.97762e-06	1.64731e-05
Sppl2c	2.06549	23.2279	4.861	4.77841	1.76686e-06	1.47626e-05
Fank1	1.98305	29.2852	4.86105	6.02447	1.6967e-09	1.91953e-08
Map3k5	1.9612	19.9954	4.23744	4.71874	2.37308e-06	1.94607e-05
Gspt2	1.75768	32.2276	4.86121	6.62953	3.36748e-11	4.31274e-10
Gm266	1.74898	31.2343	4.87761	6.4036	1.51756e-10	1.84687e-09
Cnnm1	1.6312	22.86	4.86131	4.70243	2.57086e-06	2.10195e-05
Gm10044	1.59027	25.3692	4.86134	5.21855	1.80332e-07	1.67679e-06
Gm43950	1.58963	25.3655	4.86134	5.2178	1.8106e-07	1.6826e-06
Gm3830	1.5754	22.8875	4.86138	4.70804	2.50116e-06	2.04701e-05
Ephb6	1.56355	25.3733	4.86137	5.21938	1.79522e-07	1.67021e-06
Gm11934	1.42474	29.8378	4.86154	6.13752	8.382e-10	9.69698e-09
Btbd18	1.19211	22.1259	4.86189	4.55089	5.34183e-06	4.2509e-05
Gm30735	1.05278	21.8777	4.86232	4.49944	6.81312e-06	5.35928e-05
Gm6781	1.01712	3.75767	0.894329	4.20166	2.64963e-05	0.000196185

## Sheet: Overlap with SC genes
Gene names				The entire list of 1339 genes that both were higher expressed in OHC-like cells than in P30_WT OHCs, and were overlapped with P60_WT SCs-enriched genes	Figure 6-figure supplement 7A
Dbi
Id2
Actg1
Odf3l2
Gsn
Actb
Anxa4
Cd24a
Btg2
Zbtb20
Apoc3
Nr1d1
Ptma
Socs2
Fasn
Tpd52
Serinc2
Cnn3
Dpp4
Tspan8
Cd9
Pde6d
Fdft1
Cd164
Zfp36
Tmod1
Ces1d
Cfl1
Enho
Cyb5r3
Otog
Ier2
Tuba4a
Stx7
Bcam
Fgfr3
Cldn3
Wls
Rassf6
Bdh2
Tspo
Ehd3
Irgm1
Fzd9
Kcnj16
Pfn1
Tnfrsf12a
Clstn1
Plxnb2
Id1
Psat1
S100a10
Pdia4
Cdh1
Mal
Cmtm7
Fmn1
Fam107a
Tspan12
Dll3
Mbnl2
Epb41l4a
Pnpla2
Sec61a1
Hs3st1
Sox9
Egfl6
Pqlc3
Cd82
Mpzl1
B2m
Inpp5j
Syne2
Mycl
Grb14
Sh3bgrl3
Lgr5
Maea
Ecm1
Snx31
Rps6ka1
Rnd1
Fgfr1
Nr4a1
Nipal2
Tns1
Lgals3
Scrn1
Nrep
Serpine2
Tspan14
Itpr2
Paqr8
Cldn23
Cadps2
Tmem171
Ptprf
Sh3bgrl
Tpm4
Mal2
Clic1
Slc9a3r1
Pde4b
Litaf
Bspry
Pisd
Plpp2
Mpzl2
Cdkn1c
Tmsb10
Aldh3a2
Sgk3
Aldh1a3
Zyx
Rhoc
Galm
Wdyhv1
Tmcc3
Tmem221
Dbp
Rras2
Pcyt2
Gng12
Chil1
Samd9l
Fblim1
Cmtm8
Iqgap1
Car13
Crlf1
Rhou
Cntn1
Smim3
Maged1
Acss3
Fosb
Misp
Isca1
F11r
Neurl1b
B930095G15Rik
Ndc1
Ndn
Matn1
Hes1
Jpt1
Nfia
Gna14
Lad1
Parva
Luzp2
Stard4
Mark1
Dip2b
Sstr2
Trim25
Avpi1
Insig1
Fermt2
Ppdpf
Rab27b
Sdc1
Nudt3
Elovl5
Gm16136
Ets2
Ppp1r3c
Gca
Pacsin3
Gcat
Kremen1
Sin3b
Hk2
Hbegf
Hmgb2
Rasgrp1
Hdc
Echdc2
Galnt1
Pacs1
Pls3
Pole3
Fmnl1
Mapk11
Gm12715
Zfp185
Septin9
Epb41l4b
Rhpn2
Bhlhe40
Perp
Phyh
Fbxo30
Adgrl3
Map3k1
Tgfa
Prkar2b
Smoc1
Dgkb
Adgrg1
Erbin
St3gal6
Gulp1
Sowaha
Rasd1
Irx3
Exoc3
Sfn
Rtp4
Tspan9
Tfeb
Dmtn
Kcnh7
Dennd1b
Creb3l4
Prex1
Ptprk
1810019D21Rik
Otogl
Slc31a2
Zfp62
Cnksr1
Ccsap
Ctsz
Arap2
Tmem159
Stx11
Trim26
Ccdc69
Cyb5r1
Rhoj
Chst8
Wee1
Hgs
Tlcd1
Ndrg1
Gpr37
Psmd10
Elf1
Egr2
Gstk1
Irx5
Slitrk6
Hivep2
Ntn4
Dennd2d
Cobll1
Slc39a8
Esrp1
Cd151
Tbc1d8
Plp2
Tmem129
Bmp6
Cblc
Plekha1
Hey1
Cntnap2
Ank2
Ireb2
Cpxm2
1700001L19Rik
Snx9
Shc4
Aldoc
Cyp2j12
Tpd52l1
Boc
Wwtr1
Plekha6
Fam174b
Prom2
Blmh
Ece1
Mcm2
Stxbp6
Sacs
Grhl1
Cldn6
Gpt2
Adgrl2
Tmem189
Acadl
Eva1a
Arl6
Ppp2r2b
Stimate
Shc2
C2cd4b
Cadm1
Kcnb2
Egfr
Fam234a
Rasa4
Nckap5
Snx7
Slc2a10
Mxra8
Galk2
Amer2
Clip1
Nedd9
Tapbpl
Memo1
Gm47163
Tmem43
Car11
Itih5
Sox10
Tmem252
Map4k5
Gprc5c
Dapk1
Hpn
Rnf130
Fam222b
Etv5
Rbms1
Phlda1
Rab13
Prag1
Resf1
F3
Zswim7
Trak2
Dhrs11
Itga6
Traf4
Ubxn11
Nup62
Tmem51
Adcy2
Ppp2r5a
Elovl7
Ebf3
Sall2
Metrnl
Pvr
Irf2bpl
Lmcd1
Amot
Marcks
BC064078
Nxt2
Lpar3
BC006965
Sgpl1
Rhbdl2
Tprn
S100a11
Creb5
Bche
Dsg2
Akr1cl
Ephb1
Vangl1
Clmn
Mapkapk3
Rgs6
Aox2
F730043M19Rik
Tuba1c
Mtap
Utp14b
Mgat2
Pmepa1
Arid5a
Cib3
Fut2
Tmprss2
Bcl3
Rgs2
Trib1
Gm11223
Tes
Shroom1
B4galnt1
Apod
Gm19345
Ulk1
Smim5
Mavs
Agfg2
Crim1
Gfod2
Rusc2
Zfp467
Vstm4
Dhrs3
Sh3bp5
Rasef
Cavin3
Cyp2j6
Bzw2
Jpt2
Kif1a
Sox2
Sppl2a
Pitpnc1
Plod2
Bcl6
Mir99ahg
Ezh2
Sqor
Dyrk3
Itgb8
Cemip
Alg13
Ppl
Pik3ap1
Abhd17c
Sapcd2
Agpat4
Ppp4r1l-ps
Ogfr
Septin8
Pof1b
Arhgef38
Klhl32
Sowahb
Fam83g
4930452B06Rik
Fbn2
Git1
Parp3
Fscn1
Tmem186
Dmd
Gm49329
Baiap2
Gm8730
Klf4
Vegfa
Mettl27
Tulp3
Nsmce3
Scarb1
Zfp931
Cyp39a1
Tcf12
Cdk6
Zfp395
Foxp4
Prox1
Cdo1
Fam114a1
Acot9
Trip6
Casp8
Lpcat1
Myc
Fkbp5
Capn5
Zfp874a
Rab20
Stox2
Clic4
Emx2os
Tmem37
Pacc1
Zfp40
Scnn1b
Ctso
Eva1c
Pdgfd
Pnpla7
Rgmb
Wnt7a
Rap1gap2
Lonrf3
Epb41l1
Ipo4
D11Wsu47e
Mb21d2
Plin2
Wnt7b
Chrng
S1pr1
AW146154
Cdc42ep1
Rcan2
Etv3
Hsd11b2
Lfng
Afap1l2
Gipr
Dhcr7
Gm20559
Ifngr1
Hexb
Iffo2
Ndst1
Prpsap2
Arhgef5
Dpyd
Fndc3b
Mipol1
Spry1
Timm21
Plcl2
Pdzk1ip1
Bcl2l14
Oxa1l
Pam
Cpm
Dclk2
Rab3c
Mid2
L3mbtl3
Zfp2
Efna3
Scara3
Cwc22
Ctbs
Ccnjl
Mpc1-ps
Macc1
Rdh11
Zfp945
Arhgef6
Socs3
Lyrm1
Trpm6
Adssl1
Traf3ip2
Kifc3
Yap1
Cracr2b
Zfp948
Pex5
Sema3f
Dclre1c
Mgat4a
Nectin4
Zfp959
Ttc30b
Il18
Gch1
Tcf7l2
Ncapd3
Evi5l
Ifi35
Ddx28
Radil
Rrp9
Cecr2
Fzd4
Prps2
Siae
Nup54
Pgm5
Arhgef17
Hip1
Gstm7
Kctd12
Mr1
Slc44a3
Mrm1
Aaas
Ccser1
Ctdspl
Pde3b
Zc3hav1
Htra1
Tenm3
Ift88
Adamts1
Vill
Ing2
Nudt7
Tiam2
Hspa1b
Rorc
Tlr3
Bglap3
2610021A01Rik
Haus8
Pkia
Dgkd
Phf7
Trim56
Plscr3
Fam122b
Gramd3
Acp6
Slc10a3
Ppp1r36
Aass
Apool
Sulf2
Klhl25
Gm49327
Casp9
Ltbr
Tnk1
Tctn2
Ovol2
A730020E08Rik
Trmt9b
Vwa5a
Ackr3
Amer1
Lrrc8d
Dnajc12
Kat2a
Alms1
Gng7
Ncdn
Smim13
Xpnpep3
Dnase1l1
Gm10638
Rcan1
Nhs
Prodh
B4galnt3
Nudt19
Wfdc3
Smcr8
P2ry2
Epha1
Wdr92
Disp3
Rpusd1
Cdc20
Ankib1
Grb7
Slc35d1
Hmox1
Parp12
Sumf1
Atp8b2
Myadm
Sox21
Gsg1l
Naprt
4732419C18Rik
Net1
Prdm2
Elac1
Coro2b
Rab37
Stambpl1
Trp53i13
B4galt6
Gsto1
Naf1
Nln
Prdm15
Slco4a1
Itgb6
Zfp994
Tmem14a
Cyp2j9
Tacc3
4930455G09Rik
Fam83f
Slc22a17
Tmco6
Pafah2
Helz2
Pank1
Nat2
Rbfox3
Aatk
Myzap
Flot2
Rhbdf1
Lekr1
Vegfd
P4htm
Mettl18
Atg10
Pkn3
Atxn3
Parp9
Haus3
Slc4a10
Arg2
Tmc6
Mylip
Efcab15
Gm13782
Pdzd8
Bbc3
Lhfpl2
Fbxo10
Gm42528
Arhgap31
Wdr55
Arhgap33
2610528J11Rik
Nrtn
Zfp747
Dse
H2-DMb1
Arsg
Kcnab1
Fam117a
Nme5
Scnn1a
Mical1
Klhl23
Tmem125
Batf
Slc25a24
Myd88
Pld1
Pcsk4
Lpgat1
Acsl5
Egfros
Clcn5
9130008F23Rik
Pwwp2b
Sytl5
A730089K16Rik
Slc25a53
Clybl
Rhbdl3
Btbd17
Gemin8
Rnf125
Gpr157
Plekhd1
Kazn
Inf2
1810020O05Rik
Gm49331
Eri1
Itpkc
Spata13
Atoh8
Fam151b
2810006K23Rik
Pdxk
Bcar3
Hs3st6
Cish
Bbs5
1700017B05Rik
Mfsd2a
N4bp3
Abracl
Cyb5d1
Nek8
Gck
Vrk2
Snrnp35
Cep135
Ccdc17
Gm7467
Zfp758
Zbtb3
Arhgef37
Fosl2
Tmem185b
Cbx8
Slc44a4
Wdr4
E130309D02Rik
Slc66a2
Apobec3
Zfp709
Lyn
9430038I01Rik
Slc25a18
Pdp1
Bmp2k
Gm47585
Gm48582
Gm14295
Arhgef10l
Il6ra
6330403K07Rik
Dsel
1700007K13Rik
A130012E19Rik
Itgbl1
Tspan15
Accs
Pard6g
Rassf3
Dennd2a
Ak8
1700084E18Rik
1700037C18Rik
BC052040
Hyal2
Chst13
Ralb
Pfkfb3
Tmem229b
Gm42929
Reep2
Cfi
A230001M10Rik
Ston2
Qrsl1
Gm9847
Gm31036
Fhad1
1700030C10Rik
Slc22a5
Polr1e
Socs1
Sptlc3
Snx22
5730420D15Rik
Pacrg
Prr15
Slc15a5
Ttyh1
Wdr24
Gm15760
Gm35315
Rfc3
Pus7l
Ano6
Dph1
Ccdc126
Dtx3l
Dhx34
D230025D16Rik
Gm3325
Gm38116
Zbtb8b
Snhg4
Spon1
Elf5
Klk1b8
Gprc5b
Gm15454
Gm43654
Sirt6
Ism1
Zcwpw1
Hccs
Syt10
Mpst
Rnf225
Gm38240
Capsl
Nrm
Pbld2
Sat2
A330076H08Rik
Ghdc
Kif9
Kctd14
Crppa
5930430L01Rik
Hpdl
Six5
Stk33
Mettl1
Tnfrsf4
Gm9887
Zfp729b
Ripor1
Trmt61a
Gpm6b
Mocos
Rab35
Gm17709
Tcaf1
Srbd1
Flot1
Tceal1
Pla2g5
Specc1
Bend6
A230057D06Rik
Dcaf12l1
Slc26a11
Megf10
Rab34
Tlnrd1
Prr12
Zfp974
Jmjd8
Gm48405
Sowahc
Trim6
Tubd1
Lysmd1
Urb2
Ppfia2
Reep4
Adamts2
Nmi
Il4ra
4631405J19Rik
Msrb2
C2cd4c
Rnf217
A630052C17Rik
Zfp280b
Lratd1
Cdk18
Iqcg
Dennd2c
Zbed3
Ubxn10
Nfxl1
Atic
Ccdc51
Foxq1
Rpl23a
Gm26549
Tmem253
Rai14
Sobp
Gm16046
Gm37018
1110020A21Rik
Ptpre
Tcea3
D030028A08Rik
Rcc1
C330013E15Rik
Pcgf2
Adar
Rita1
Nhlrc3
Tgm2
Atp11c
Trim59
Gm17435
N4bp2l1
Lox
Kif3c
Fam214b
Fpgs
Ptpdc1
Tbc1d30
Lrrc75b
Zfp189
Stard5
Gdpd3
Best1
Gchfr
Fam83b
Nexn
A630089N07Rik
Casc1
Swap70
Galr2
D130062J10Rik
C630043F03Rik
Ppil6
Gm37258
Tmem51os1
Rpp40
Trim12a
Mcmdc2
B3gnt8
Cd274
Fam221a
1700028J19Rik
Il1rap
Slc29a3
Lamb2
Sigirr
Pemt
Gm7805
Gm14038
Gabrg3
Dbn1
Pgf
Fadd
Asap2
Dcn
Aldh5a1
Nme4
Homez
Gm48181
Ttc38
Xk
Airn
BC025920
Rac3
1700101I11Rik
Nlgn2
Pprc1
Rbks
Zbtb33
Hyal3
Gm44103
Plekhh3
Gm17949
Rps6kc1
Junos
Rnf24
Cxcl16
Grin2c
Gm11423
Lama2
Tnnt2
Gm48182
Afg1l
Gm9776
Gm44699
Rasgrf1
Snx20
Tram2
Mocs3
Cenpj
Tert
Micall1
Snhg16
Npas2
Gm14150
Tmem82
Mansc1
Usp12
Chst5
Pmel
Itpripl1
Pask
Itgb4
Col13a1
Pcdh17
4930506C21Rik
Map3k20
Nmral1
Pcbd1
Pgbd5
Gm44045
Gm34455
Aifm2
Gm10130
Gm904
Efna2
Gnas
Tspan1
Atp10a
Zfp760
6030443J06Rik
Peli3
Smtn
Adora1
Pdss1
Gm17098
Apold1
Gm15327
Gm3226
Zfp383
Nppc
2010109A12Rik
Lin9
Gm45847
Soga1
Lamc1
Pigl
Gm49760
Tle6
Mrm2
Fastkd5
Polh
Smim6
Rwdd3
Gm43445
Zfp763
6030400A10Rik
Gm11346
Nkpd1
Neurod2
Lrp4
Gm16016
Zfp568
Hap1
Gm32815
Paqr3
Haus6
Nek3
Stamos
Fzd5
Gm43457
Pantr2
Il17d
Gm50269
Gm3724
Plxdc2
Ovca2
Irx3os
Gm16045
Ttc21a
Gm38393
Gm37706
Gm10647
Wdr59
Zfp93
Gm9800
Dnaic1
3110039M20Rik
Gm43062
Zgrf1
Tmem144
Lzts3
Zik1
Gm29443
Rassf7
Cenpw
Gm16794
Zdhhc9
Lrriq3
Notch3
B230317F23Rik
5730507A11Rik
Gm26550
A730011C13Rik
Ankrd37
Ccpg1
Gm44243
Pdpn
Zfp607b
Gm15708
G630022F23Rik
Map7d2
Cd46
1700055D18Rik
Rnf144b
4933431K14Rik
Gm19327
F830208F22Rik
Dok4
Gm49377
Gm44044
Mamdc4
Gm50464
Morn5
Grk4
Pla2g15
Gm10226
B230208H11Rik
Nalcn
Alpk1
Eef1akmt4
Dipk1a
Gstcd
Gm12602
Gm11737
Lrrc19
1010001B22Rik
2810455O05Rik
Pip5k1b
9930104L06Rik
Piezo1
Kdm8
Gm11437
Dusp4
Gm11827
Cd72
Gm3791
Fam184b
Arid3a
Sec22c
4933431E20Rik
Gm47817
0610040J01Rik
A930019D19Rik
4930549G23Rik
Camk4
Tap2
Sorcs1
Gm47513
1810021B22Rik
Dhx35
4921511C10Rik
Gm49284
Adgre5
Cetn4
Gm10101
Hspa1a
Ccdc142os
Ssc4d
Tdg-ps2
Fam161b
Gm49699
Gm37052
Xylb
Prickle1
D930048N14Rik
Tnfrsf23
Gm34655
Gm26813
Trpv4
Gm49326
Gm10617
Gm13830
Ulk4
Gm17971
Gm20681
Gm45413
4930533B01Rik
Rnaset2a
Ninj2
Gm7665
Gm42690
4831440D22Rik
AL928616.1
Piga
Gm45435
Abhd3
Zfp808
Gm15634
Abi3bp
Calr3
Rps15a-ps5
Gm43172
Zpbp
Xaf1
Gk5
Apbb1ip
Zfp229
Gm23864
Fancb
Sh3bp2
Gm4617
Gm42725
Lyrm7
Thtpa
Lrrn4cl
Izumo1
Adcy10
Gm8186
5430403G16Rik
Arl4d
AI506816
Pde8b
Spata5l1
Tmem177
Sfxn5
Gm14964
D830036C21Rik
Rps12-ps9
Gpr171
Gm49474
Cd59a
4930513N20Rik
Gm45797
Ears2
3222401L13Rik
Gm16246
Rbl1
Plekhd1os
Arhgap29
Ntf5
Gm15344
Gm11821
9330162012Rik
Gm37423
Gm49463
Irf7
Gstt2
Cdc42ep5
Tmem140
Gm43372
Cercam
Gm45094
Slc10a7
Galnt4
Gm37718
1810062O18Rik
Gm9484
Arhgef26
Iqsec2
Gm12406
Rgma
Mob3a
Gm15413
Gm39326
Gm37864
Cep72
Copz2
2010016I18Rik
Gm13502
Gm4356
Gm21814
Tsnaxip1
Gad1
Tsix
Speg
Cenpa
Arpin
Osbpl10
Gm38251
Gm10335
2610037D02Rik
Gm43290
Gm43138
Wbscr25
Gm7160
Gm16209
Sdr42e1
Gm20404
Rab11b-ps2
Slc3a1
Gm3734
2700078F05Rik
B230369F24Rik
Gm38309
Dnajb5
Gimap9
Cox4i2
Rps15a-ps3
Dleu2
Tmprss4
Gm14022
Prdm9
Gm9292
Gm16267
1700029I15Rik
Magi2
Prkd3
Acacb
Gm41293
Gm2531
1700061A03Rik
Ung
5830444F18Rik
Gm22358
Optn
Gm44668
Tpm3-rs7
Gm45124
Sez6l
Tigd3
Psmb10
Gm15559
Med18
Gm8130
Dlec1
Clstn3
Rps15a-ps7
Efcab8
Gm45854
Hspb8

## Sheet: 54 SC genes
Gene names		Genes that were down-regulated in OHC-like cells (relative to P60_WT SCs), but their expression levels in OHC-like cells were still higher than P30_WT-OHCs
Dbi
Odf3l2
Cnn3
Tspan8
Zfp36
Mal
Fam107a
Egfl6
Serpine2
Zyx
Tmem221
Fblim1
Acss3
Gm16136
Rasgrp1
Pls3
Zfp185
Erbin
St3gal6
Creb3l4
Stx11
Rhoj
Ntn4
Dennd2d
Fam174b
Ppp2r2b
Sox10
Lpar3
Aox2
Fut2
Tmprss2
B4galnt1
Gm19345
Rusc2
Vstm4
Dhrs3
Bcl6
Gm8730
Tulp3
Pdgfd
Rcan2
Arhgef6
Pgm5
Trim56
Ackr3
2610528J11Rik
Egfros
5730420D15Rik
Ano6
Gm3325
Pla2g5
Gm48405
Rai14
Gm49377

## Sheet: Adult OHCs over OHC-like cells
genes	baseMean	log2FoldChange	lfcSE	stat	pvalue	padj			Genes expressed in a higher level in P30_WT OHCs than in OHC-like cells
Car2	5811.25	-3.23128	0.790786	-4.08616	4.38575e-05	0.000318545
Sorbs2	5764.94	-2.59254	0.373555	-6.94017	3.91624e-12	5.43598e-11
Sri	4712.85	-4.4764	0.572964	-7.8127	5.59758e-15	9.26879e-14
Rn7sk	3912.54	-6.32279	0.598242	-10.569	4.15091e-26	1.27427e-24
Kcna10	3550.85	-7.14389	1.62069	-4.40793	1.04361e-05	8.05837e-05
Efr3a	3423.13	-3.33577	0.566578	-5.88758	3.91899e-09	4.2808e-08
Lcp1	3283.5	-4.68518	1.17163	-3.99885	6.36508e-05	0.000454059
Prdx5	3203.14	-2.21424	0.370716	-5.97287	2.33117e-09	2.60142e-08
Slc26a5	2856.27	-4.63788	1.01508	-4.56897	4.90126e-06	3.9098e-05
Tmem229a	2821.62	-2.57467	0.632299	-4.07191	4.66294e-05	0.00033778
Lmo7	2812.09	-4.805	1.17319	-4.09568	4.20933e-05	0.000306138
Pgrmc1	2692.47	-3.16909	0.597383	-5.30495	1.12702e-07	1.07227e-06
Efcab14	2385.4	-3.07959	0.589263	-5.22618	1.73052e-07	1.61644e-06
Lpin2	2342.65	-3.77468	0.834523	-4.52316	6.09233e-06	4.81541e-05
Gm5737	2171.95	-17.3599	1.8615	-9.32577	1.10181e-20	2.56926e-19
Cgn	2156.62	-3.64918	0.745129	-4.89737	9.71272e-07	8.31873e-06
Gm45716	2110.27	-8.07107	1.5181	-5.31655	1.05753e-07	1.00909e-06
Pakap	2010.09	-3.87465	0.920758	-4.20812	2.57509e-05	0.000190752
Gltp	1999.48	-2.59758	0.515152	-5.04236	4.59826e-07	4.06796e-06
Mlxip	1944.79	-2.36817	0.515288	-4.59581	4.31064e-06	3.45547e-05
Stard10	1929.57	-3.2787	0.737541	-4.44546	8.77055e-06	6.83344e-05
Rnf11	1920.63	-2.5	0.453135	-5.51713	3.44586e-08	3.43601e-07
Magi3	1857.12	-3.91635	0.914747	-4.28134	1.85768e-05	0.000139949
Osbp2	1611.99	-10.3963	1.56415	-6.64658	2.99981e-11	3.87212e-10
Sall1	1547.95	-3.25272	0.600394	-5.41765	6.03877e-08	5.89247e-07
Aftph	1527.99	-3.21929	0.67158	-4.7936	1.63813e-06	1.3743e-05
Abca5	1498.35	-4.66462	0.958647	-4.86584	1.13972e-06	9.7057e-06
Ndufa5	1475.98	-2.33258	0.317721	-7.34159	2.11075e-13	3.16863e-12
Chst2	1453.39	-7.27022	1.42568	-5.09948	3.40597e-07	3.07118e-06
Nbeal1	1438.01	-2.76399	0.675111	-4.09412	4.23773e-05	0.000308067
Cacna1d	1268.75	-4.36641	1.12762	-3.87225	0.000107836	0.000747338
Cdk5rap2	1264.41	-3.47002	0.866799	-4.00326	6.24768e-05	0.000446267
Gm1673	981.913	-2.94446	0.710596	-4.14365	3.41819e-05	0.000250489
Gm34653	979.487	-11.7986	1.93076	-6.11083	9.91173e-10	1.14183e-08
Gpam	878.484	-4.66395	1.17004	-3.98615	6.71534e-05	0.00047697
Foxn3	785.98	-3.70291	0.779309	-4.75153	2.01883e-06	1.67823e-05
Rbp7	753.697	-7.72771	2.0237	-3.8186	0.000134209	0.000919002
Spg20	730.838	-3.01926	0.756065	-3.99339	6.51355e-05	0.000463642
Otof	716.491	-11.6934	1.88232	-6.2122	5.22467e-10	6.13524e-09
1600022D10Rik	659.106	-31.9359	2.0798	-15.3553	3.26588e-53	3.3461e-51
Kcnn2	642.94	-4.80021	1.14905	-4.17755	2.94663e-05	0.000217195
Kalrn	570.141	-5.83225	1.41514	-4.12133	3.76688e-05	0.000275426
Cables1	537.39	-14.0746	1.6945	-8.30601	9.89705e-17	1.82911e-15
Faim2	523.958	-15.3288	1.7202	-8.91105	5.0553e-19	1.08046e-17
Fscn2	500.517	-15.2271	2.07698	-7.33136	2.27833e-13	3.41084e-12
AA465934	467.486	-10.1253	1.37265	-7.3765	1.6251e-13	2.46441e-12
Gm15772	455.707	-6.91582	0.543021	-12.7358	3.73899e-37	1.92746e-35
Drc1	455.629	-10.3276	1.92003	-5.37886	7.49589e-08	7.24529e-07
Atp8a2	418.677	-30.0624	1.89368	-15.8752	9.41735e-57	1.22523e-54
Lasp1	394.571	-6.95336	1.66852	-4.16739	3.08106e-05	0.000226798
C1ql1	383.953	-13.5926	1.79823	-7.55891	4.06462e-14	6.3762e-13
Slc45a3	371.015	-13.067	1.34145	-9.74096	2.0165e-22	5.04679e-21
Osbpl3	370.875	-8.24651	2.16044	-3.81704	0.000135061	0.000924061
Paqr9	366.014	-12.9925	1.44137	-9.01402	1.98635e-19	4.31287e-18
Zfp365	352.302	-9.53625	1.69322	-5.63201	1.78123e-08	1.8193e-07
Gstm1	342.26	-12.4087	2.15565	-5.75637	8.59396e-09	9.01926e-08
Tectb	324.242	-17.465	2.75272	-6.34463	2.22966e-10	2.68558e-09
Lmod3	269.748	-29.6787	1.98173	-14.9762	1.0509e-50	9.41389e-49
Atp6v1c2	262.394	-12.7712	2.28984	-5.57732	2.44249e-08	2.46247e-07
A530016L24Rik	260.575	-13.0334	1.75543	-7.42462	1.13108e-13	1.72803e-12
Zfp385a	242.606	-6.75546	1.396	-4.83918	1.30379e-06	1.10341e-05
Gm42696	219.36	-12.5776	2.23672	-5.62324	1.87403e-08	1.9117e-07
Nrp2	207.793	-8.34426	1.72002	-4.85125	1.22684e-06	1.04075e-05
Gm2694	206.674	-32.2818	1.85349	-17.4168	6.15437e-68	1.27707e-65
Vwa3a	205.612	-12.1607	1.39774	-8.70025	3.31157e-18	6.72695e-17
Aebp1	204.517	-17.6574	2.50955	-7.03609	1.97706e-12	2.78915e-11
Amotl2	203.063	-6.50531	1.65858	-3.92221	8.77404e-05	0.000614246
Ankrd33b	201.939	-35.7993	3.33672	-10.7289	7.44901e-27	2.36193e-25
Gm6831	201.876	-31.9763	3.8423	-8.32217	8.63663e-17	1.6034e-15
Kazald1	195.815	-27.1345	1.73614	-15.6292	4.60295e-55	5.16823e-53
Zfp608	192.126	-5.89593	1.46272	-4.03081	5.55852e-05	0.000399303
Dnm3os	191.343	-12.3255	2.07868	-5.92947	3.03918e-09	3.3663e-08
Epha4	189.783	-29.2125	3.13662	-9.31337	1.23837e-20	2.85923e-19
Rnf213	189.773	-9.23891	2.34885	-3.93337	8.37623e-05	0.000588815
Kcnma1	185.395	-11.4719	1.54538	-7.42333	1.14209e-13	1.74323e-12
B230217C12Rik	181.687	-12.5131	2.17061	-5.76482	8.17458e-09	8.6122e-08
Gm43259	179.517	-28.6712	2.54571	-11.2626	2.00828e-29	7.2515e-28
Lrrc52	175.849	-29.7802	3.06888	-9.70393	2.901e-22	7.21639e-21
Spns2	174.272	-33.9596	2.71415	-12.5121	6.41207e-36	3.1377e-34
Irx2	174.136	-8.47454	1.74119	-4.8671	1.1325e-06	9.64921e-06
Popdc3	172.6	-8.57769	1.99707	-4.29513	1.74591e-05	0.000131771
Frk	168.319	-14.6277	2.99885	-4.87775	1.07303e-06	9.1568e-06
Clrn2	163.396	-12.3599	2.42343	-5.10019	3.39322e-07	3.06136e-06
Meikin	157.905	-10.7795	1.61314	-6.68231	2.35211e-11	3.06261e-10
A930033H14Rik	154.997	-12.0216	1.72883	-6.95357	3.56166e-12	4.95639e-11
Abcc8	148.219	-12.2171	2.11577	-5.77432	7.72662e-09	8.15599e-08
Plat	147.047	-11.9661	2.99267	-3.99847	6.37536e-05	0.000454397
St3gal1	139.033	-10.1835	2.61559	-3.89339	9.88538e-05	0.000687531
1700025G04Rik	136.96	-12.1047	2.18601	-5.53736	3.07064e-08	3.0712e-07
Gpr152	136.695	-12.0843	2.09843	-5.75872	8.47553e-09	8.9178e-08
Palm3	133.79	-27.7762	3.40425	-8.15926	3.37091e-16	6.0261e-15
Rad9a	133.175	-18.7498	2.91631	-6.42927	1.28215e-10	1.56853e-09
Fndc4	131.089	-11.6809	2.62454	-4.45067	8.5602e-06	6.68198e-05
Myorg	126.409	-26.7974	2.6039	-10.2913	7.71633e-25	2.23883e-23
Trim17	125.438	-38.0649	3.53072	-10.781	4.23075e-27	1.35723e-25
Gm9195	124.911	-12.0492	2.20544	-5.4634	4.67113e-08	4.61011e-07
Scn8a	124.54	-10.178	2.07767	-4.89879	9.6431e-07	8.26343e-06
Gm43018	123.599	-27.0547	2.3384	-11.5697	5.86702e-31	2.26301e-29
Sgip1	123.138	-11.1817	2.03213	-5.50249	3.7447e-08	3.72719e-07
Osbpl6	120.94	-10.106	2.23245	-4.52688	5.98611e-06	4.73602e-05
Cdc45	119.595	-25.1867	3.35085	-7.51651	5.62592e-14	8.75838e-13
Sec14l5	117.679	-27.9199	3.4461	-8.10189	5.41098e-16	9.49702e-15
Gm37805	115.68	-11.3313	1.73594	-6.5275	6.68771e-11	8.36883e-10
Gm42993	115.608	-12.2112	2.70992	-4.50612	6.60234e-06	5.20097e-05
Gm44676	114.301	-36.2734	2.7726	-13.0828	4.12882e-39	2.3259e-37
Tmem139	109.571	-24.5981	3.19488	-7.69921	1.36907e-14	2.20246e-13
Gm5111	109.013	-11.7762	1.07652	-10.9392	7.48892e-28	2.48012e-26
Cabp4	107.572	-11.737	2.0931	-5.6075	2.05276e-08	2.08235e-07
0610033M10Rik	107.072	-32.3588	1.71214	-18.8996	1.14822e-79	3.76455e-77
Tgfb2	105.044	-23.9115	2.47015	-9.68021	3.65956e-22	9.04845e-21
Aqp5	100.021	-9.88887	2.41068	-4.10211	4.094e-05	0.000298015
Mypn	99.9238	-27.7863	2.36348	-11.7565	6.53911e-32	2.62734e-30
Jph1	97.6402	-26.9557	3.21487	-8.3847	5.08566e-17	9.56069e-16
H2-Q10	96.3672	-15.2514	3.19046	-4.78029	1.7504e-06	1.46325e-05
Igsf3	95.248	-10.0355	2.54801	-3.93856	8.19716e-05	0.000576721
Zc2hc1c	92.9934	-25.7051	3.76469	-6.82795	8.61369e-12	1.16505e-10
Crxos	89.813	-31.0263	3.3606	-9.23239	2.64665e-20	6.01756e-19
Map2k6	86.5429	-35.0144	3.28993	-10.6429	1.88181e-26	5.86474e-25
Slc5a11	86.4677	-24.4546	3.53094	-6.92581	4.33499e-12	6.00198e-11
Nup62cl	85.056	-21.1495	2.81987	-7.50018	6.37321e-14	9.86553e-13
2610307P16Rik	83.835	-22.8192	2.17406	-10.4961	9.00143e-26	2.70753e-24
Sdr9c7	83.1371	-28.6989	3.78209	-7.5881	3.24643e-14	5.11718e-13
Gm43188	82.7312	-10.0469	2.56709	-3.91371	9.08871e-05	0.000634816
Afap1l1	82.231	-40.2632	2.66509	-15.1076	1.44279e-51	1.36714e-49
Gm42701	80.8124	-38.1183	2.98997	-12.7487	3.16825e-37	1.63839e-35
Gm26802	80.1949	-18.1178	2.89495	-6.2584	3.88954e-10	4.61704e-09
C230085N15Rik	79.903	-21.6044	3.29691	-6.55294	5.64142e-11	7.11383e-10
3110045C21Rik	78.4389	-39.3878	3.54207	-11.12	1.00286e-28	3.49041e-27
Nipa1	77.3428	-26.7736	2.74599	-9.75007	1.84345e-22	4.64203e-21
Armh4	76.9314	-32.536	3.29203	-9.88326	4.92068e-23	1.28039e-21
Gm45073	76.6984	-26.1704	4.44427	-5.88857	3.89546e-09	4.26006e-08
Ltbp3	76.3834	-7.24715	1.56167	-4.64064	3.47338e-06	2.81598e-05
Gm35147	74.2241	-27.0677	4.21497	-6.4218	1.34672e-10	1.64261e-09
Fign	71.4825	-12.4985	2.63334	-4.74625	2.07221e-06	1.71824e-05
Mpped1	70.9865	-31.2472	2.67731	-11.6711	1.79063e-31	7.00568e-30
Bub1b	70.3028	-27.4117	3.07775	-8.9064	5.27187e-19	1.12382e-17
Ccdc60	67.3268	-10.7723	2.47925	-4.34499	1.39283e-05	0.000106149
Dok7	65.2827	-27.6519	3.75576	-7.36252	1.80471e-13	2.7267e-12
Cebpd	64.1507	-18.0702	3.50025	-5.16254	2.43623e-07	2.23612e-06
2310015A10Rik	63.6475	-24.0253	2.71604	-8.8457	9.09558e-19	1.90183e-17
2310016D03Rik	62.8557	-10.9792	2.13614	-5.13972	2.75155e-07	2.50729e-06
Gm49417	62.4648	-11.5383	1.76677	-6.53071	6.54571e-11	8.19739e-10
Gm37941	61.3158	-10.946	2.27962	-4.80168	1.57342e-06	1.32137e-05
Gm31698	60.9399	-32.7795	4.10854	-7.97838	1.48265e-15	2.53442e-14
Kcna7	59.522	-26.2417	3.64467	-7.20002	6.02042e-13	8.76489e-12
E230020D15Rik	59.4504	-33.6662	3.75528	-8.96504	3.10177e-19	6.68164e-18
Frmpd4	59.3676	-30.2314	3.90082	-7.75002	9.1878e-15	1.50016e-13
Prkcz2	59.2482	-8.01471	1.78989	-4.47776	7.5432e-06	5.91371e-05
Gm4294	58.7492	-2.57164	0.462745	-5.55737	2.73874e-08	2.74762e-07
Gm45130	56.2341	-30.1364	4.12587	-7.30426	2.78787e-13	4.13964e-12
Pygm	55.6672	-30.5872	3.28844	-9.30144	1.38554e-20	3.19006e-19
Frmd3	55.434	-23.9172	4.38335	-5.45638	4.8595e-08	4.78162e-07
Rpl15-ps6	54.1687	-7.65428	0.634948	-12.055	1.82591e-33	7.89766e-32
Trim71	52.4328	-11.3164	1.87376	-6.03943	1.5466e-09	1.75456e-08
Disc1	52.068	-31.9582	2.62828	-12.1594	5.11379e-34	2.29045e-32
Dnah8	51.4465	-32.9591	2.96912	-11.1006	1.24585e-28	4.30869e-27
4930426I24Rik	51.3326	-11.3532	2.78643	-4.07448	4.6118e-05	0.000334371
Ephb4	51.3253	-38.1	2.43256	-15.6625	2.72892e-55	3.12833e-53
Phldb1	51.2125	-10.165	2.32468	-4.37264	1.22754e-05	9.41208e-05
Gm43256	50.6682	-33.8154	3.43638	-9.84043	7.53871e-23	1.94617e-21
Gm10570	49.7979	-20.7633	3.20509	-6.47824	9.27987e-11	1.14725e-09
Plppr5	49.4907	-33.31	4.87361	-6.83476	8.21432e-12	1.11379e-10
Hspb1	49.3247	-23.0871	4.87462	-4.7362	2.17767e-06	1.80296e-05
Gm45153	49.074	-27.3647	3.8186	-7.16615	7.71367e-13	1.11607e-11
Tox3	48.2001	-21.8965	3.08659	-7.09408	1.30213e-12	1.85454e-11
D630039A03Rik	47.6348	-39.52	2.83849	-13.9229	4.59947e-44	3.20847e-42
Tbc1d4	46.24	-31.2116	2.50383	-12.4655	1.15093e-35	5.53288e-34
1700086P04Rik	46.0404	-36.5319	3.89168	-9.38717	6.16339e-21	1.45376e-19
Dnhd1	44.7746	-11.528	2.8367	-4.06389	4.8261e-05	0.000348982
4933412E12Rik	44.5323	-27.48	3.02808	-9.07506	1.13615e-19	2.48332e-18
Zfp429	44.2234	-18.8621	3.63767	-5.18522	2.15766e-07	1.98822e-06
Fam166c	43.4761	-31.5224	4.14104	-7.6122	2.69462e-14	4.2638e-13
Gm45205	42.7731	-23.2301	3.58933	-6.47199	9.67218e-11	1.19485e-09
Abca6	41.1136	-11.1598	2.79947	-3.98639	6.70851e-05	0.000476691
Fam189b	40.7067	-25.6693	3.36767	-7.62226	2.49282e-14	3.95976e-13
Tsku	40.1164	-11.1662	2.62809	-4.2488	2.14915e-05	0.000160799
Hyi	39.6321	-22.3108	2.98024	-7.48624	7.08751e-14	1.09403e-12
Calhm2	38.9605	-23.7947	3.89324	-6.1118	9.85129e-10	1.13567e-08
Gm9625	38.8505	-5.91003	1.16974	-5.05244	4.362e-07	3.87567e-06
Hfm1	37.4491	-28.2225	4.87364	-5.79084	7.0036e-09	7.4407e-08
Apol7b	36.4132	-24.6063	3.56307	-6.90593	4.98746e-12	6.88211e-11
4921513I03Rik	36.386	-41.5179	4.17271	-9.94985	2.52573e-23	6.66736e-22
Gab2	35.5576	-24.1656	3.04563	-7.93452	2.11312e-15	3.58967e-14
Rpgrip1	34.9599	-23.1384	3.42186	-6.76194	1.36156e-11	1.80292e-10
Gm16415	34.9046	-25.7438	4.87364	-5.28225	1.27609e-07	1.20501e-06
Rfpl4	34.0345	-22.6568	2.83917	-7.9801	1.46212e-15	2.50193e-14
Avil	33.7269	-21.8281	3.11628	-7.00451	2.47843e-12	3.48447e-11
Gm12346	33.4432	-2.14247	0.433617	-4.94091	7.77571e-07	6.71233e-06
Flrt2	33.4088	-19.7135	3.60614	-5.46665	4.58616e-08	4.52897e-07
Cnih3	33.2442	-25.7793	3.27794	-7.86451	3.70554e-15	6.19846e-14
Gm12279	33.1253	-24.1652	2.9768	-8.11785	4.7452e-16	8.39137e-15
E430014B02Rik	32.3165	-26.0988	3.52295	-7.40821	1.28013e-13	1.95029e-12
Ryr2	31.4809	-9.93691	2.42077	-4.10485	4.04572e-05	0.000294893
Rpl15-ps2	30.4823	-6.56534	0.597905	-10.9806	4.73957e-28	1.5824e-26
Mfsd3	30.1874	-24.2707	4.87385	-4.97977	6.36588e-07	5.55676e-06
Ppp2r2c	29.2089	-29.8932	4.77037	-6.26643	3.6942e-10	4.3947e-09
Gm45873	28.4227	-24.8993	4.38112	-5.68331	1.32111e-08	1.36121e-07
BC001981	28.3503	-33.5497	4.19355	-8.00029	1.24124e-15	2.13288e-14
Gm6981	28.1167	-31.7205	4.87366	-6.50857	7.58718e-11	9.44393e-10
Gm26207	27.5438	-26.1366	3.75662	-6.95748	3.46415e-12	4.8269e-11
Gm49594	27.3264	-4.17083	1.02835	-4.05586	4.99497e-05	0.000360557
Rapgef4	26.8753	-24.0565	4.21873	-5.70231	1.18196e-08	1.22477e-07
Lipa	26.102	-23.1746	3.18291	-7.28097	3.31427e-13	4.89026e-12
Gm46430	25.7975	-20.2321	1.82845	-11.0652	1.85088e-28	6.29492e-27
Gm42699	25.6825	-35.2912	4.13624	-8.5322	1.43588e-17	2.81224e-16
B4galt2	25.5116	-29.0623	4.87367	-5.96312	2.47468e-09	2.75782e-08
Gm13596	25.18	-40.9587	4.10029	-9.9892	1.69942e-23	4.5225e-22
Fam161a	24.717	-9.21866	2.29516	-4.01656	5.90548e-05	0.000423485
Slc8a1	24.7004	-26.7182	3.23115	-8.26894	1.35154e-16	2.482e-15
Gm37570	24.5802	-33.3834	3.49559	-9.55014	1.29521e-21	3.13162e-20
Usp18	24.3524	-30.6937	4.88874	-6.27845	3.41967e-10	4.077e-09
Gm41177	24.3068	-31.2196	4.46806	-6.98729	2.80255e-12	3.93341e-11
Tcap	23.8443	-25.2593	4.87368	-5.1828	2.18581e-07	2.0119e-06
Herc6	23.1412	-20.1567	4.79908	-4.20012	2.66771e-05	0.000197346
Myt1	22.609	-30.7804	4.87369	-6.31563	2.6907e-10	3.22668e-09
Gm10636	22.4139	-18.3513	4.75954	-3.85569	0.000115406	0.000797573
Arg1	22.0825	-23.4081	4.03364	-5.80323	6.50506e-09	6.92901e-08
Dzip1l	21.6025	-9.4396	2.43075	-3.88341	0.000103001	0.000715464
Slc45a1	21.0205	-23.9543	3.48843	-6.86678	6.56681e-12	8.93359e-11
Gm38235	20.8764	-24.7601	3.85212	-6.42766	1.2958e-10	1.58404e-09
Emp3	20.4238	-20.0281	4.33172	-4.62359	3.77151e-06	3.04563e-05
Gm49703	19.9939	-23.0885	4.35076	-5.30676	1.1159e-07	1.06231e-06
Mslnl	19.8421	-24.5784	3.92668	-6.25934	3.86615e-10	4.59259e-09
9530018F02Rik	19.0879	-35.4745	3.26494	-10.8653	1.68697e-27	5.50886e-26
Gm10136	19.059	-2.80781	0.703514	-3.99112	6.5763e-05	0.000467702
Gm15387	18.5243	-3.13229	0.73419	-4.26633	1.98718e-05	0.000149089
Gm22068	17.498	-40.4815	3.17205	-12.7619	2.67514e-37	1.39218e-35
Gm29170	17.0184	-21.6463	3.71541	-5.82609	5.67395e-09	6.07135e-08
Wfdc1	17.0006	-25.5797	4.87373	-5.24848	1.53358e-07	1.44069e-06
Cdyl2	16.4032	-24.3013	3.16147	-7.6867	1.50976e-14	2.42168e-13
Gm16152	16.1513	-28.6735	4.87374	-5.88327	4.0224e-09	4.38717e-08
Ccdc80	16.149	-17.5856	4.22168	-4.16554	3.10619e-05	0.000228442
Ighm	16.134	-31.803	4.87374	-6.52537	6.78327e-11	8.48194e-10
Fam57a	15.6477	-23.8497	4.46924	-5.3364	9.48079e-08	9.07819e-07
Ercc8	15.408	-24.1172	3.28541	-7.34071	2.12469e-13	3.18664e-12
Stpg1	15.2927	-22.4084	4.52425	-4.95295	7.30968e-07	6.33673e-06
Gm44640	15.1802	-40.1984	4.09491	-9.81669	9.54291e-23	2.43671e-21
St6galnac3	15.1134	-28.6029	4.87376	-5.86875	4.39083e-09	4.76682e-08
Zfp583	15.0321	-24.4109	4.87408	-5.00831	5.49088e-07	4.81863e-06
Klrg2	15.0228	-24.9195	4.89861	-5.08705	3.63674e-07	3.26669e-06
Pou2f2	14.8591	-41.6182	2.80061	-14.8604	5.95527e-50	5.16533e-48
Relt	14.746	-33.7474	3.0899	-10.9218	9.06341e-28	2.98947e-26
Gm43343	14.6661	-15.0738	3.39693	-4.43747	9.10221e-06	7.07839e-05
Slc6a14	14.6521	-24.5711	4.89861	-5.01594	5.27748e-07	4.63632e-06
Gm42995	14.5792	-21.6589	3.88255	-5.57852	2.42568e-08	2.44853e-07
Gm31848	14.4206	-32.928	4.87377	-6.75616	1.41693e-11	1.87019e-10
Gm10643	14.338	-24.1858	3.89721	-6.20593	5.43759e-10	6.3807e-09
Myoz1	14.2966	-29.1386	4.87377	-5.97867	2.24973e-09	2.51912e-08
Pld2	13.5974	-20.2473	4.89321	-4.13783	3.5061e-05	0.000256816
Rem1	13.2146	-31.6876	4.72708	-6.70343	2.03583e-11	2.65711e-10
9130019O22Rik	13.1792	-25.3385	4.875	-5.19764	2.01838e-07	1.86513e-06
Scn11a	12.9505	-25.8098	4.7622	-5.41973	5.96878e-08	5.83112e-07
Dusp27	12.8676	-27.7759	4.87379	-5.69902	1.20495e-08	1.2478e-07
Cdh15	12.8293	-26.0738	4.87384	-5.34974	8.80811e-08	8.45878e-07
Nmnat3	12.7217	-23.6621	3.55192	-6.66179	2.7052e-11	3.51521e-10
Fezf2	12.7196	-29.4975	4.87379	-6.05226	1.42828e-09	1.6237e-08
Gm24447	12.7012	-6.5681	0.955197	-6.87618	6.14792e-12	8.40557e-11
Tbc1d24	12.6991	-23.3634	4.87411	-4.79338	1.63997e-06	1.37514e-05
Zfp280c	12.5709	-23.1103	4.08263	-5.66064	1.50812e-08	1.54709e-07
Zfp128	12.3206	-29.4243	4.8738	-6.03724	1.56775e-09	1.77732e-08
Crb2	11.9395	-21.178	3.5057	-6.04102	1.53146e-09	1.73859e-08
Kcnab2	11.8073	-22.7187	3.3887	-6.70424	2.02457e-11	2.64453e-10
Gm48683	11.6571	-18.4724	4.42532	-4.17425	2.98969e-05	0.00022027
Ahnak	11.6044	-18.3196	3.09171	-5.92538	3.11572e-09	3.44409e-08
Gm44799	11.5446	-27.5477	3.94532	-6.98237	2.90247e-12	4.07017e-11
Oasl2	11.2891	-16.9031	3.1297	-5.40087	6.63192e-08	6.44876e-07
Stpg4	11.2502	-28.58	4.87383	-5.86398	4.5189e-09	4.9026e-08
Myrf	11.08	-24.2175	3.87493	-6.24978	4.11037e-10	4.85455e-09
Ddr2	11.072	-27.1032	4.19276	-6.46428	1.01782e-10	1.25358e-09
Rnft2	10.4086	-15.5291	3.08018	-5.04163	4.6158e-07	4.08128e-06
Aars2	10.1719	-16.9495	3.74061	-4.53122	5.86432e-06	4.64415e-05
A430072P03Rik	10.1157	-27.901	4.87386	-5.72463	1.03657e-08	1.07958e-07
Myl3	10.0995	-27.4567	4.87386	-5.63345	1.76636e-08	1.80523e-07
Gm45698	9.89826	-32.1835	4.87386	-6.60329	4.02144e-11	5.12226e-10
Cenpm	9.87308	-21.2339	4.87483	-4.35583	1.32566e-05	0.000101218
Gm43254	9.77603	-22.2715	4.63167	-4.80853	1.52048e-06	1.27756e-05
Gm23025	9.62769	-29.0103	4.87387	-5.9522	2.64554e-09	2.94422e-08
Gm47867	9.62009	-21.828	4.03485	-5.40988	6.30673e-08	6.14663e-07
Gm47121	9.51445	-20.9835	4.31609	-4.86168	1.16392e-06	9.89714e-06
A330035P11Rik	9.26784	-26.8631	4.87389	-5.51163	3.55524e-08	3.54077e-07
Rec8	9.13027	-25.7336	4.62513	-5.56385	2.63882e-08	2.65225e-07
Sh3bp1	9.1254	-32.4691	4.87397	-6.66173	2.70615e-11	3.51521e-10
Fstl1	9.05078	-20.8206	2.49111	-8.35796	6.3813e-17	1.19416e-15
A830019P07Rik	8.8255	-21.7765	4.11658	-5.28995	1.22349e-07	1.16002e-06
Kcnb1	8.71151	-24.8392	4.20518	-5.90682	3.48774e-09	3.83207e-08
Gsdme	8.32495	-23.5592	4.8741	-4.83355	1.34119e-06	1.1333e-05
9530097N15Rik	8.26282	-31.919	4.87394	-6.54892	5.7955e-11	7.2969e-10
Fam178b	8.23772	-27.3878	4.87393	-5.61924	1.91799e-08	1.95298e-07
Gm11292	8.14158	-26.3732	4.87393	-5.41107	6.26498e-08	6.10956e-07
Mboat1	8.13541	-32.2082	4.89861	-6.57497	4.86645e-11	6.17459e-10
Gm7785	8.10746	-14.9266	2.99205	-4.98874	6.07738e-07	5.31341e-06
Apex2	8.00016	-20.3597	4.57285	-4.45231	8.49527e-06	6.63789e-05
Sh2d6	7.60707	-38.2557	4.87403	-7.8489	4.19712e-15	6.99933e-14
Il27ra	7.409	-28.3842	4.87397	-5.82362	5.75854e-09	6.15784e-08
Chst14	7.40697	-39.9487	4.87767	-8.19013	2.60945e-16	4.70074e-15
Lamc3	7.33362	-30.6326	4.14026	-7.39873	1.37492e-13	2.09277e-12
Rps23rg1	7.24742	-24.2544	4.87408	-4.97621	6.48419e-07	5.648e-06
Gm48532	7.22687	-32.7842	3.90888	-8.3871	4.98269e-17	9.37788e-16
Inhba	7.08435	-30.1722	3.99789	-7.54701	4.45352e-14	6.96627e-13
Gm13920	6.95464	-21.7531	2.61026	-8.3337	7.83535e-17	1.45794e-15
Gm45131	6.90078	-26.8862	4.874	-5.51625	3.46311e-08	3.45111e-07
Gm20554	6.88897	-30.1541	4.874	-6.18672	6.14292e-10	7.18266e-09
Rbm41	6.81402	-23.5008	4.87555	-4.82014	1.43456e-06	1.20971e-05
Gm11592	6.77738	-23.523	4.88753	-4.81286	1.48785e-06	1.25207e-05
Hivep3	6.71227	-14.7203	3.38339	-4.35076	1.35665e-05	0.000103488
Gm38037	6.68203	-26.5894	4.87401	-5.45534	4.88803e-08	4.80681e-07
Il17rb	6.61088	-23.2122	4.87493	-4.76153	1.92126e-06	1.602e-05
Grin3b	6.20002	-37.7598	4.87427	-7.74677	9.42594e-15	1.53598e-13
Gm26532	6.1262	-21.6626	4.89861	-4.4222	9.77006e-06	7.56188e-05
Gm5527	6.09321	-2.02083	0.503943	-4.01002	6.07124e-05	0.000434421
Ttc9	5.86933	-36.8072	4.87473	-7.55061	4.3321e-14	6.7893e-13
Prelid2	5.76752	-24.1126	4.87412	-4.94708	7.5336e-07	6.52051e-06
Rps6-ps1	5.70683	-4.94445	1.20378	-4.10743	4.00089e-05	0.000291756
Gm29418	5.64218	-33.648	4.87412	-6.90341	5.07704e-12	6.99394e-11
D630036H23Rik	5.5269	-15.5181	3.94555	-3.93306	8.38719e-05	0.000589332
Pde1b	5.47638	-24.2562	4.87412	-4.97653	6.47339e-07	5.64159e-06
Trim67	5.45577	-32.2541	4.87426	-6.61724	3.65978e-11	4.66885e-10
A330093E20Rik	5.43363	-34.3436	4.87414	-7.04607	1.84043e-12	2.60087e-11
Gprin2	5.36784	-30.0334	4.87414	-6.16178	7.19313e-10	8.3629e-09
Cox7c-ps1	5.36726	-2.93403	0.688232	-4.26314	2.01578e-05	0.000151165
B230362B09Rik	5.30903	-28.2794	4.87413	-5.80194	6.55539e-09	6.97808e-08
Gm28991	5.16817	-27.5988	4.87415	-5.66228	1.49374e-08	1.53331e-07
Gm48822	5.14294	-43.1591	4.87422	-8.85456	8.40137e-19	1.76569e-17
Apol6	5.04959	-27.0006	4.87416	-5.53953	3.03287e-08	3.03713e-07
Pnma5	4.98586	-25.6484	4.74178	-5.40903	6.33663e-08	6.1721e-07
Ckap2l	4.88957	-25.4109	4.8742	-5.21335	1.85459e-07	1.72056e-06
Gm23444	4.86945	-39.3682	4.87422	-8.07682	6.6477e-16	1.16303e-14
Gm48717	4.83112	-28.6251	4.87419	-5.8728	4.28499e-09	4.65552e-08
Mc5r	4.80851	-24.741	4.89861	-5.05061	4.40393e-07	3.9087e-06
Gm45843	4.80209	-28.4724	4.8742	-5.84145	5.17489e-09	5.58105e-08
Efcab6	4.79674	-28.5698	4.8742	-5.86144	4.58874e-09	4.97508e-08
Aqp7	4.73204	-23.8991	4.02571	-5.93663	2.90937e-09	3.22688e-08
Inpp4b	4.51563	-26.1621	4.87424	-5.36743	7.98675e-08	7.70611e-07
Gm16150	4.42959	-31.759	4.87425	-6.51566	7.23713e-11	9.03566e-10
Gm31152	4.42924	-30.2708	4.89861	-6.17946	6.43205e-10	7.49933e-09
Rtraf-ps	4.38027	-6.47969	0.940889	-6.88678	5.70705e-12	7.82688e-11
Gm37860	4.37572	-25.2118	4.89861	-5.14673	2.65063e-07	2.42206e-06
Gm42675	4.36622	-26.1343	4.87426	-5.3617	8.24411e-08	7.94041e-07
Gm42480	4.36222	-25.0348	4.87426	-5.13611	2.8048e-07	2.54732e-06
Gm43101	4.26486	-27.3897	4.87428	-5.61923	1.91807e-08	1.95298e-07
Pdgfb	4.2637	-33.1596	4.89861	-6.7692	1.295e-11	1.71894e-10
Gm28693	4.1576	-25.9698	4.89861	-5.30146	1.14882e-07	1.09175e-06
Gm48611	4.10931	-28.1617	4.8743	-5.77758	7.5783e-09	8.00974e-08
Tns3	4.0653	-32.2591	4.00648	-8.05173	8.16299e-16	1.41905e-14
Gm13453	4.04245	-3.89172	0.64206	-6.0613	1.35022e-09	1.53923e-08
Slc36a4	3.97445	-18.8616	4.16114	-4.5328	5.82082e-06	4.61192e-05
C030032O16Rik	3.96816	-28.3762	4.87433	-5.82156	5.83002e-09	6.23021e-08
4930430F21Rik	3.84127	-27.3668	4.87436	-5.61444	1.97201e-08	2.00416e-07
2500002B13Rik	3.82622	-28.0628	4.87436	-5.75723	8.55035e-09	8.97923e-08
Chst15	3.81286	-22.6221	4.89861	-4.61806	3.87342e-06	3.12639e-05
Gm42676	3.80814	-28.2888	4.87436	-5.8036	6.49069e-09	6.9182e-08
9530080O11Rik	3.76707	-20.7624	4.8774	-4.25685	2.07324e-05	0.000155403
Gm4544	3.75331	-24.2679	4.78884	-5.06759	4.02878e-07	3.60013e-06
Gm50423	3.65431	-26.3259	4.8744	-5.40085	6.63247e-08	6.44876e-07
Nudt17	3.52618	-31.4961	4.89861	-6.42961	1.2793e-10	1.56738e-09
Gm30275	3.10776	-26.5094	4.87455	-5.43833	5.37834e-08	5.27946e-07
Myh7b	3.06167	-16.6962	3.48851	-4.78606	1.70091e-06	1.42405e-05
Acot4	2.5574	-22.5736	4.89861	-4.60816	4.0624e-06	3.27087e-05
Gm12993	2.41453	-23.1973	4.89861	-4.73548	2.18534e-06	1.80839e-05
Vdac3-ps1	1.85021	-3.91506	0.975859	-4.01191	6.02285e-05	0.000431146
Gm8483	1.38209	-3.61711	0.949131	-3.81097	0.00013842	0.000946258

## Sheet: Overlap with OHC genes
Gene names	The entire list of 179 genes that both were lower expressed in OHC-like cells than in P30_WT OHCs, and were overlapped with P30_WT OHCs-enriched genes	Figure 6-figure supplement 7A
Sri
Rn7sk
Kcna10
Efr3a
Prdx5
Slc26a5
Lmo7
Efcab14
Gm5737
Gm45716
Gltp
Mlxip
Stard10
Rnf11
Magi3
Aftph
Abca5
Chst2
Cacna1d
Gm1673
Gpam
Otof
Kalrn
Cables1
Faim2
Fscn2
AA465934
Gm15772
Atp8a2
Lasp1
C1ql1
Osbpl3
Paqr9
Zfp365
Lmod3
Atp6v1c2
A530016L24Rik
Zfp385a
Nrp2
Gm2694
Vwa3a
Gm6831
Dnm3os
Epha4
Kcnma1
B230217C12Rik
Lrrc52
Irx2
Popdc3
Clrn2
Meikin
A930033H14Rik
Abcc8
1700025G04Rik
Gpr152
Palm3
Gm9195
Scn8a
Sgip1
Sec14l5
Gm37805
Gm5111
Cabp4
Aqp5
Igsf3
Crxos
2610307P16Rik
Sdr9c7
Armh4
Gm35147
Fign
Mpped1
Bub1b
Dok7
2310016D03Rik
Gm37941
Gm31698
Gm45130
Frmd3
Disc1
Dnah8
Gm43256
Plppr5
Hspb1
Dnhd1
Fam166c
Abca6
Tsku
Hfm1
Gm16415
Gm12346
Flrt2
Cnih3
Ryr2
Mfsd3
Ppp2r2c
BC001981
Gm6981
Gm49594
B4galt2
Fam161a
Slc8a1
Tcap
Myt1
Dzip1l
Emp3
Gm49703
Mslnl
Wfdc1
Gm16152
Ighm
St6galnac3
Slc6a14
Gm31848
Myoz1
Rem1
9130019O22Rik
Scn11a
Dusp27
Cdh15
Fezf2
Gm24447
Zfp128
Kcnab2
Ahnak
Gm44799
Stpg4
Ddr2
A430072P03Rik
Myl3
Cenpm
Gm23025
Gm47121
A330035P11Rik
Rec8
Gsdme
Fam178b
Gm11292
Il27ra
Lamc3
Gm45131
Gm20554
Gm38037
Il17rb
Gm26532
Ttc9
Prelid2
Rps6-ps1
Pde1b
Trim67
Gprin2
Cox7c-ps1
B230362B09Rik
Gm28991
Apol6
Ckap2l
Gm48717
Mc5r
Gm45843
Efcab6
Aqp7
Inpp4b
Gm16150
Gm42675
Gm42480
Gm43101
Gm28693
Gm48611
Gm13453
C030032O16Rik
4930430F21Rik
2500002B13Rik
Chst15
Gm42676
9530080O11Rik
Gm50423
Gm30275
Acot4
Gm12993

## Sheet: 19 OHC genes
Gene names	Genes that were up-regulated in OHC-like cells (relative to P60_WT SCs), but their expression levels in OHC-like cells were still lower than P30_WT-OHCs
Kcna10
Slc26a5
Lmo7
Gm5737
Chst2
Cacna1d
Gm1673
Fscn2
Lasp1
Osbpl3
Nrp2
Gm9195
Scn8a
Aqp5
Igsf3
Fign
Abca6
Tsku
Fam161a
