# Supplementary material for: Dual expression of Atoh1 and Ikzf2 promotes transformation of adult cochlear supporting cells into outer hair cells
Source: eLife journal article supplement (doi:10.7554/elife.66547), 2021-09-03
Supplement: supp [file elife-66547-supp-v1.zip › elife_poa_e66547_Supplemental_file_8.xlsx]

## Sheet: GO category
Term	Gene numbers	Gene names	p-value (FDR adjusted)	-log10 transform
GO:0007155~cell adhesion	74	LGALS3BP, COL18A1, CNTNAP2, SPON1, TENM3, MEGF10, PODXL2, ITGB4, CLSTN3, CLSTN1, PTPRK, LAMC1, F11R, PTPRF, MAEA, ADGRE5, CDH1, BOC, FLOT2, NRCAM, PGM5, ITGB6, CD36, EPHB1, EGFL6, TNFRSF12A, EPHA8, ITGA2, IZUMO1, EMP2, RGMB, BCAM, NINJ2, CDHR3, CERCAM, ADAM9, ITGA6, DSG2, TLN2, EPHA1, EPHA2, CD63, NLGN2, LAMA2, COL13A1, TTYH1, FBLIM1, NTM, NEDD9, PRKX, PCDH17, DPP4, ADGRG1, PERP, PDPN, FLRT1, HES…	4.97472e-05	4.30323
Figure 6-figure supplement 7B
