# Supplementary material for: Dual expression of Atoh1 and Ikzf2 promotes transformation of adult cochlear supporting cells into outer hair cells
Source: eLife journal article supplement (doi:10.7554/elife.66547), 2021-09-03
Supplement: supp [file elife-66547-supp-v1.zip › elife_poa_e66547_Supplemental_file_9.xlsx]

## Sheet: Sheet1
Mouse strain	Primer name	Primer Sequence (5'-3')	PCR size (F+R1)	PCR size (F+R2)
Rosa26-CAG-LSL-Ikzf2/+	Rosa26-F	CCCAAAGTCGCTCTGAGTTGTTATC	609 bp (WT)
	Rosa26-R1	GAAGGAGCGGGAGAAATGGATATG		340 bp (KI)
	Rosa26-R2	CCAGGCGGGCCATTTACCGTAAG
Mouse strain	Primer name	Primer Sequence (5'-3')	PCR size (F1+R)	PCR size (F2+R)
Slc26a5-DTR/+	Slc26a5-DTR-F1	CTGCCTTGAAAGAGCTTCTG	269 bp (WT)
	Slc26a5-DTR-F2	AGGTACCATAGGAGAGGTGG		195 bp (KI)
	Slc26a5-DTR-R	TCCAAATCGAGCCGTAACTG
Mouse strain	Primer name	Primer Sequence (5'-3')	PCR size
Atoh1CreER+	Cre-F	GCCTGCATTACCGGTCGATGC	481 bp
	Cre-R	CAGGGTGTTATAAGCAATCCCC
Mouse strain	Primer name	Primer Sequence (5'-3')	PCR size
Fgfr3iCreER+	iCre-F	GAGGGACTACCTCCTGTACC	630 bp
	iCre-R	TGCCCAGAGTCATCCTTGGC
Mouse strain	Primer name	Primer Sequence (5'-3')	PCR size
CAG-LSL-Atoh1HA+	Atoh1-F	ACGCTCTGTCGGAGTTGCTG	480 bp
	Atoh1-R	AGGGATAGCCCGCATAGTCA
Mouse strain	Primer name	Primer Sequence (5'-3')	PCR size (F1+R1)	PCR size (F2+R2)
Rosa26-CAG-LSL-tdtomato/+ (Ai9/+)	Ai9-F1	AAGGGAGCTGCAGTGGAGTA	297 bp (WT)
	Ai9-R1	CCGAAAATCTGTGGGAAGTC
	Ai9-F2	GGCATTAAAGCAGCGTATCC		196 bp (KI)
	Ai9-R2	CTGTTCCTGTACGGCATGG
Mouse strain	Primer name	Primer Sequence (5'-3')	PCR size (F1+R)	PCR size (F2+R)
Slc26a5-CreER/+	Slc26a5-CreER-F	CACAAGTTGTGAATGACCTC	300 bp (WT)
	Slc26a5-CreER-R1	TAACTGCTAGCATTTCCCTT		228 bp (KI)
	Slc26a5-CreER-R2	GTTAAAGAGCGTAATCTGGAACA
