# Supplementary material for: Dual expression of Atoh1 and Ikzf2 promotes transformation of adult cochlear supporting cells into outer hair cells
Source: eLife journal article supplement (doi:10.7554/elife.66547), 2021-09-03
Supplement: supp [file elife-66547-supp-v1.zip › elife_poa_e66547_Supplemental_file_10.xlsx]

## Sheet: Sheet1
Cell names at pre-analysis step (GEO database: GSE161156)	Cell types defined at post-analysis step	Mapping rate	Numbers of genes with TPM>1	Numbers of genes with TPM>10
OHC-1	P30_WT OHC-1	0.7134	4950	3858
OHC-2	P30_WT OHC-2	0.6634	4687	3669
OHC-3	P30_WT OHC-3	0.7503	5065	4061
OHC-4	P30_WT OHC-4	0.7386	5096	3919
OHC-5	P30_WT OHC-5	0.7526	5167	4074
OHC-6	P30_WT OHC-6	0.524	5227	3958
OHC-7	P30_WT OHC-7	0.8118	5602	4224
OHC-8	P30_WT OHC-8	0.8593	5232	4168
OHC-9	P30_WT OHC-9	0.8563	4816	3725
OHC-10	P30_WT OHC-10	0.7825	4156	3307
OHC-11	P30_WT OHC-11	0.8358	5586	4289
OHC-12	P30_WT OHC-12	0.7707	3817	2983
OHC-13	P30_WT OHC-13	0.8203	4453	3487
OHC-14	P30_WT OHC-14	0.7112	5407	4214
OHC-15	P30_WT OHC-15	0.7987	5342	4130
OHC-16	P30_WT OHC-16	0.8672	4926	3856
OHC-17	P30_WT OHC-17	0.8761	4459	3538
exp-1	OHC like cells-1	0.8885	8936	6518
exp-2	OHC like cells-2	0.8037	9234	6053
exp-3	OHC like cells-3	0.8364	8843	6531
exp-4	OHC like cells-4	0.7456	3402	2424
exp-5	OHC like cells-5	0.8678	8735	6340
exp-6	OHC like cells-6	0.85	8200	6423
exp-7	Nascent HCs-1	0.8773	9269	6416
exp-8	OHC like cells-7	0.821	7382	5602
exp-9	OHC like cells-8	0.8986	8834	6577
exp-10	OHC like cells-9	0.9118	8957	6670
exp-11	OHC like cells-10	0.908	9108	6621
exp-12	Nascent HCs-2	0.8977	8595	6493
exp-13	OHC like cells-11	0.9387	8550	6605
exp-14	SCs failing to become HC-1	0.8878	8600	6469
exp-15	Nascent HCs-3	0.8872	8070	6176
exp-16	SCs failing to become HC-2	0.6168	4936	3611
exp-17	SCs failing to become HC-3	0.894	7113	5547
exp-18	SCs failing to become HC-4	0.601	4365	3149
exp-19	Nascent HCs-4	0.894	8443	5997
exp-20	Nascent HCs-5	0.8398	8532	6298
exp-21	Nascent HCs-6	0.8451	8373	6387
exp-22	Nascent HCs-7	0.9088	8537	6420
exp-23	Nascent HCs-8	0.8842	8162	6208
exp-24	SCs failing to become HC-5	0.8846	8230	6327
exp-25	SCs failing to become HC-6	0.8399	6147	4793
exp-26	SCs failing to become HC-7	0.929	8302	6671
exp-27	SCs failing to become HC-8	0.9345	8125	6018
exp-28	SCs failing to become HC-9	0.9339	6939	5339
exp-29	SCs failing to become HC-10	0.612	6800	5397
exp-30	SCs failing to become HC-11	0.9329	8257	5992
exp-31	SCs failing to become HC-12	0.3576	8061	5944
exp-32	Nascent HCs-9	0.919	7741	5840
exp-33	SCs failing to become HC-13	0.9111	7328	5643
exp-34	SCs failing to become HC-14	0.4918	7407	5618
exp-35	Nascent HCs-10	0.8886	9295	6914
exp-36	Nascent HCs-11	0.9401	8888	6896
exp-37	Nascent HCs-12	0.9134	9310	6854
exp-38	Nascent HCs-13	0.8985	7148	5125
exp-39	Nascent HCs-14	0.9048	8123	6419
exp-40	SCs failing to become HC-15	0.9413	8995	6845
exp-41	Nascent HCs-15	0.9105	7388	5887
exp-42	Nascent HCs-16	0.9254	8095	6273
SC-1	P60_WT SC-1	0.887	6341	5028
SC-2	P60_WT SC-2	0.9276	7454	5731
SC-3	P60_WT SC-3	0.9076	6486	5168
SC-4	P60_WT SC-4	0.8831	6001	4788
SC-5	P60_WT SC-5	0.926	7891	6033
SC-6	P60_WT SC-6	0.9244	7588	5887
SC-7	P60_WT SC-7	0.8902	7258	5609
SC-8	P60_WT SC-8	0.8184	7316	5869
SC-9	P60_WT SC-9	0.7842	6492	5194
SC-10	P60_WT SC-10	0.9024	7898	6078
SC-11	P60_WT SC-11	0.9216	6596	5266
SC-12	P60_WT SC-12	0.9188	7377	5807
SC-13	P60_WT SC-13	0.9291	8069	6213
SC-14	P60_WT SC-14	0.9128	6801	5346
SC-15	P60_WT SC-15	0.9269	7224	5571
SC-16	P60_WT SC-16	0.9099	8104	6157
