# Supplementary figures and images for: Dual expression of Atoh1 and Ikzf2 promotes transformation of adult cochlear supporting cells into outer hair cells
Source: eLife journal article supplement (doi:10.7554/elife.66547), 2021-09-03

Figure 1-figure supplement 1

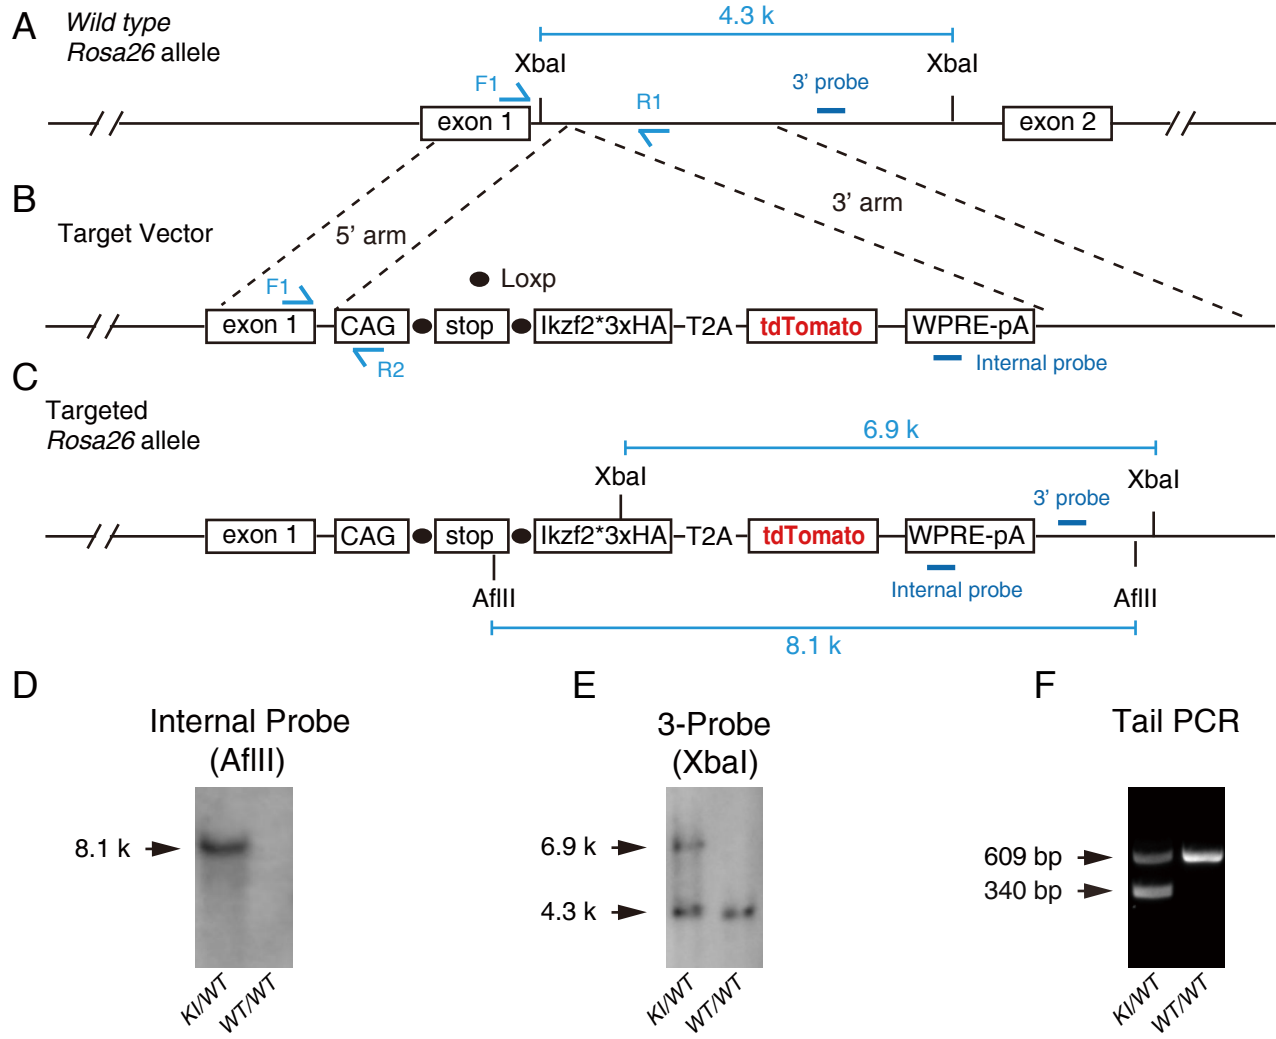

Supplement: supp [file elife-66547-supp-v1.zip › elife_poa_e66547_Figure_1_figure_supplement_1.pdf]

Figure 1-figure supplement 3

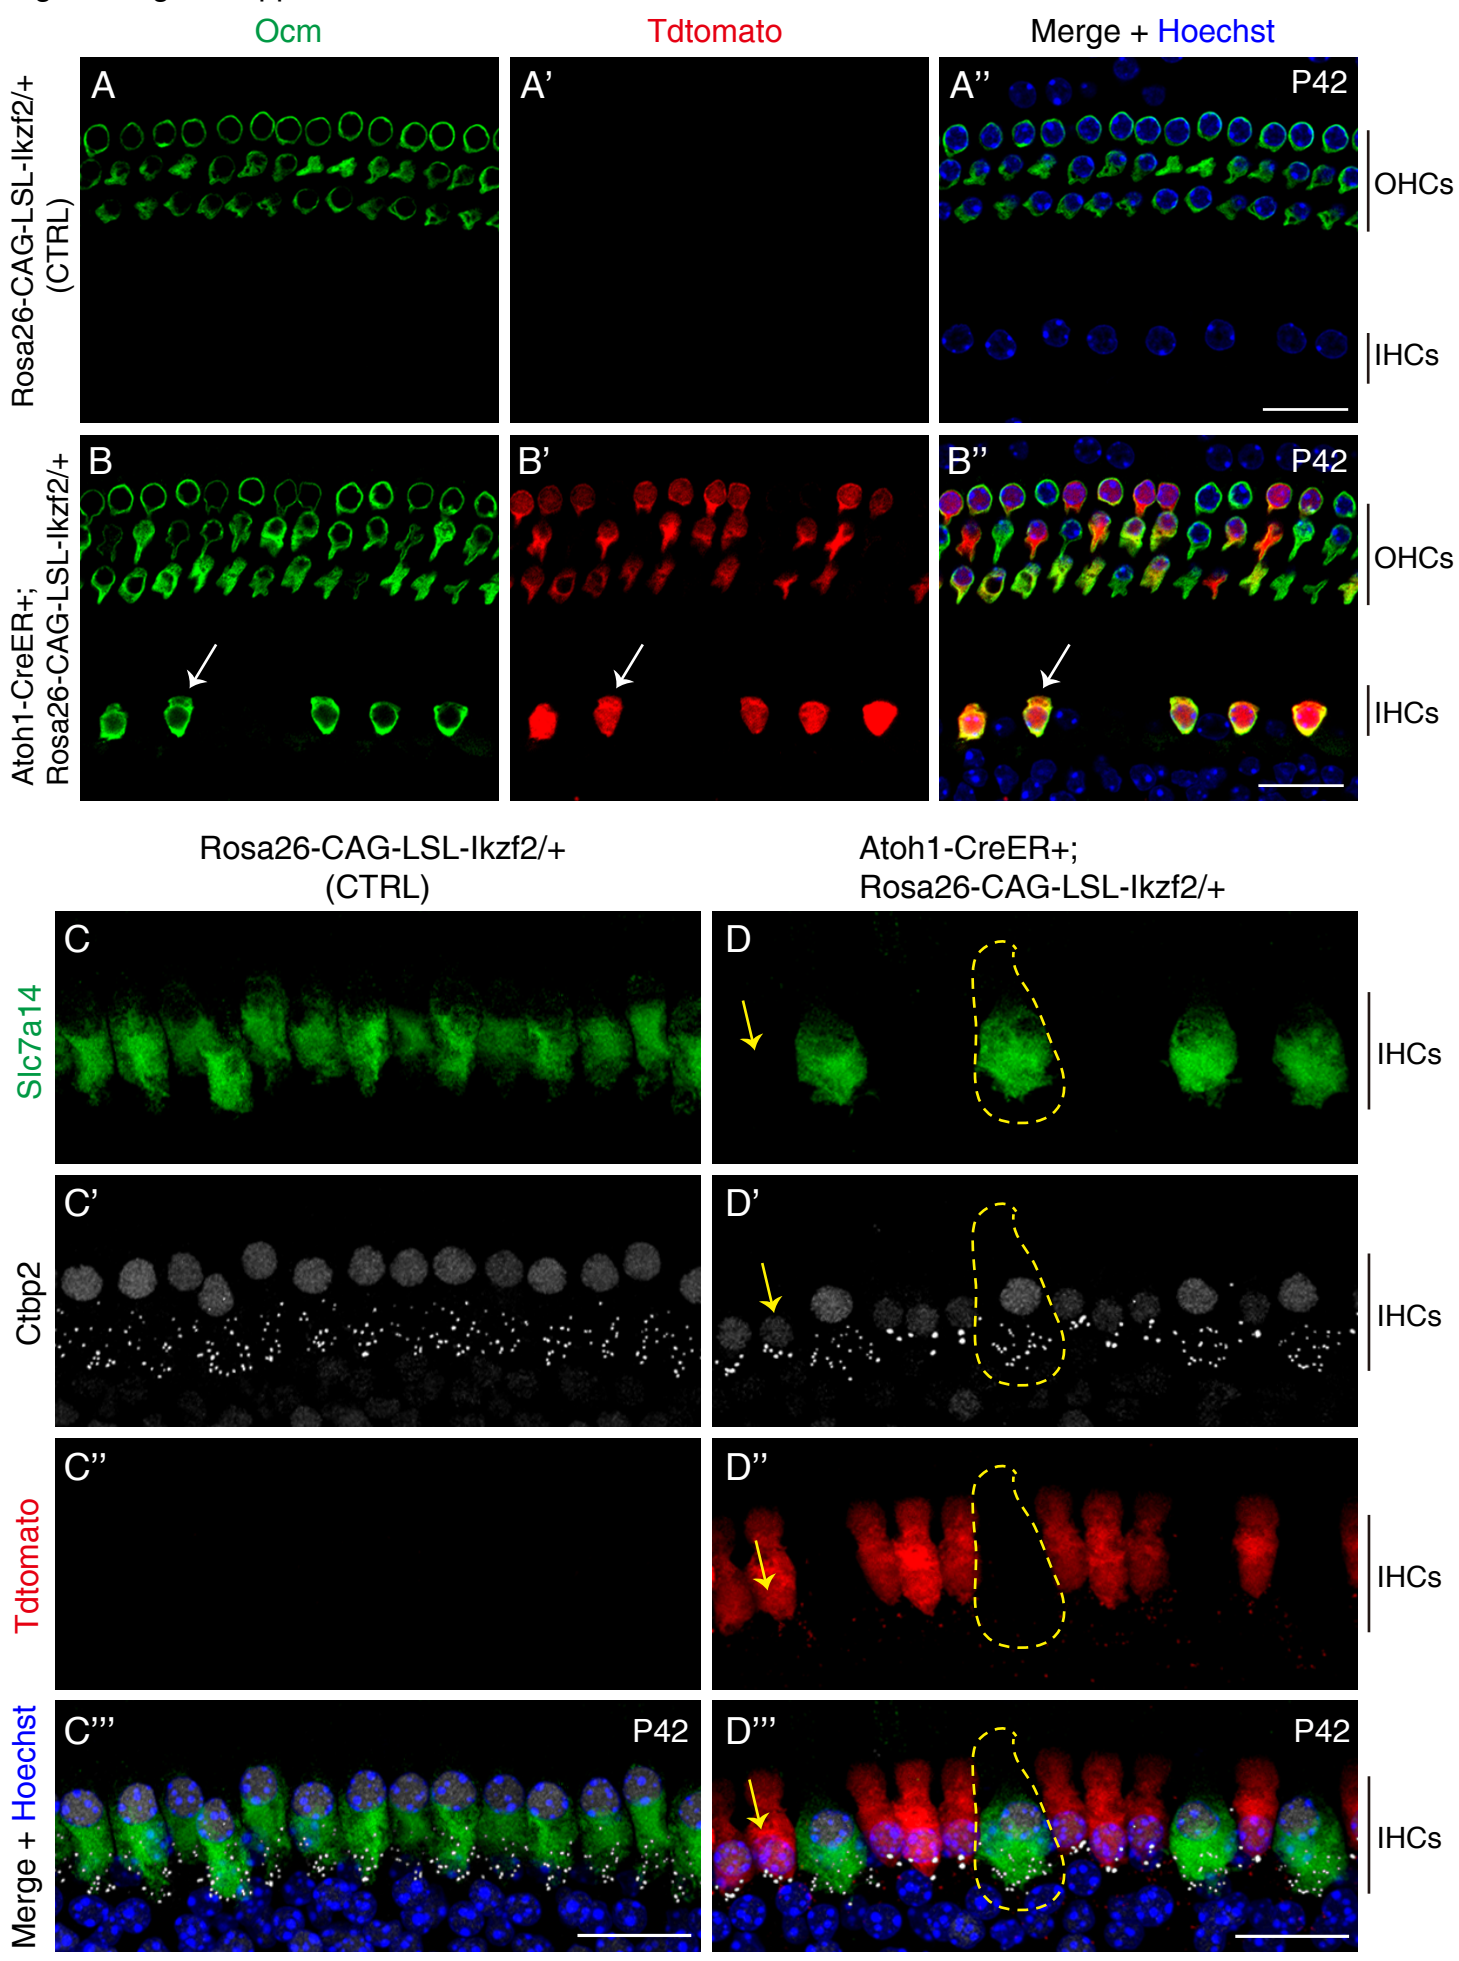

Supplement: supp [file elife-66547-supp-v1.zip › elife_poa_e66547_Figure_1_figure_supplement_3.pdf]

Figure 3-figure supplement 1

A

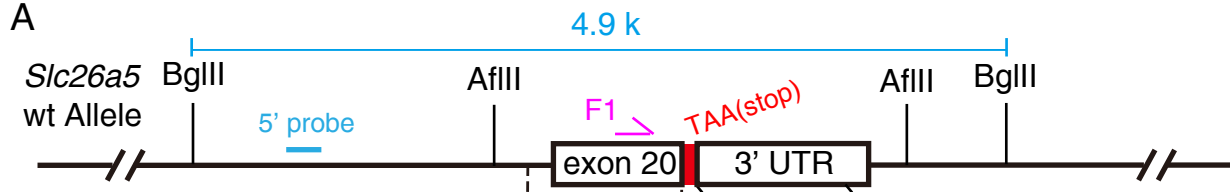

B

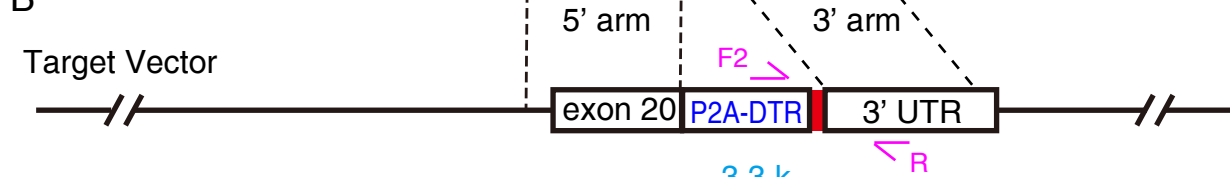

C

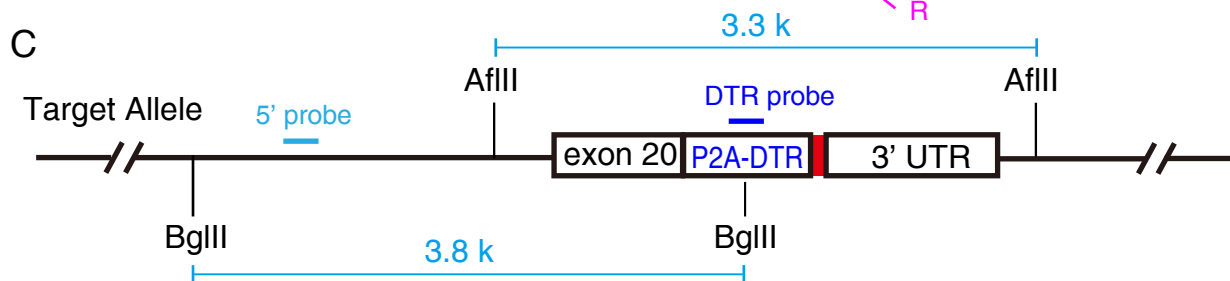

D

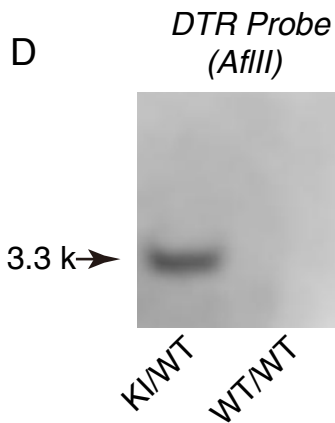

E

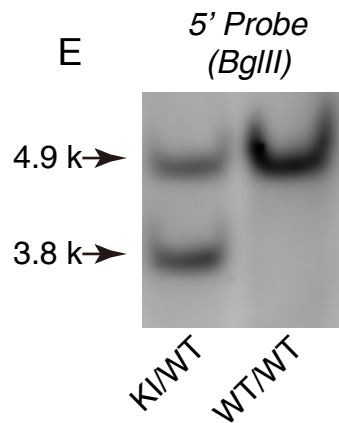

F

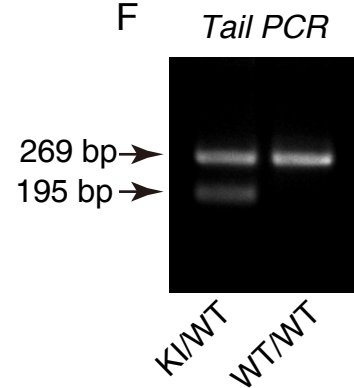

Supplement: supp [file elife-66547-supp-v1.zip › elife_poa_e66547_Figure_3_figure_supplement_1.pdf]

Figure 4-figure supplement 1

The OHC-like cell in HC layer

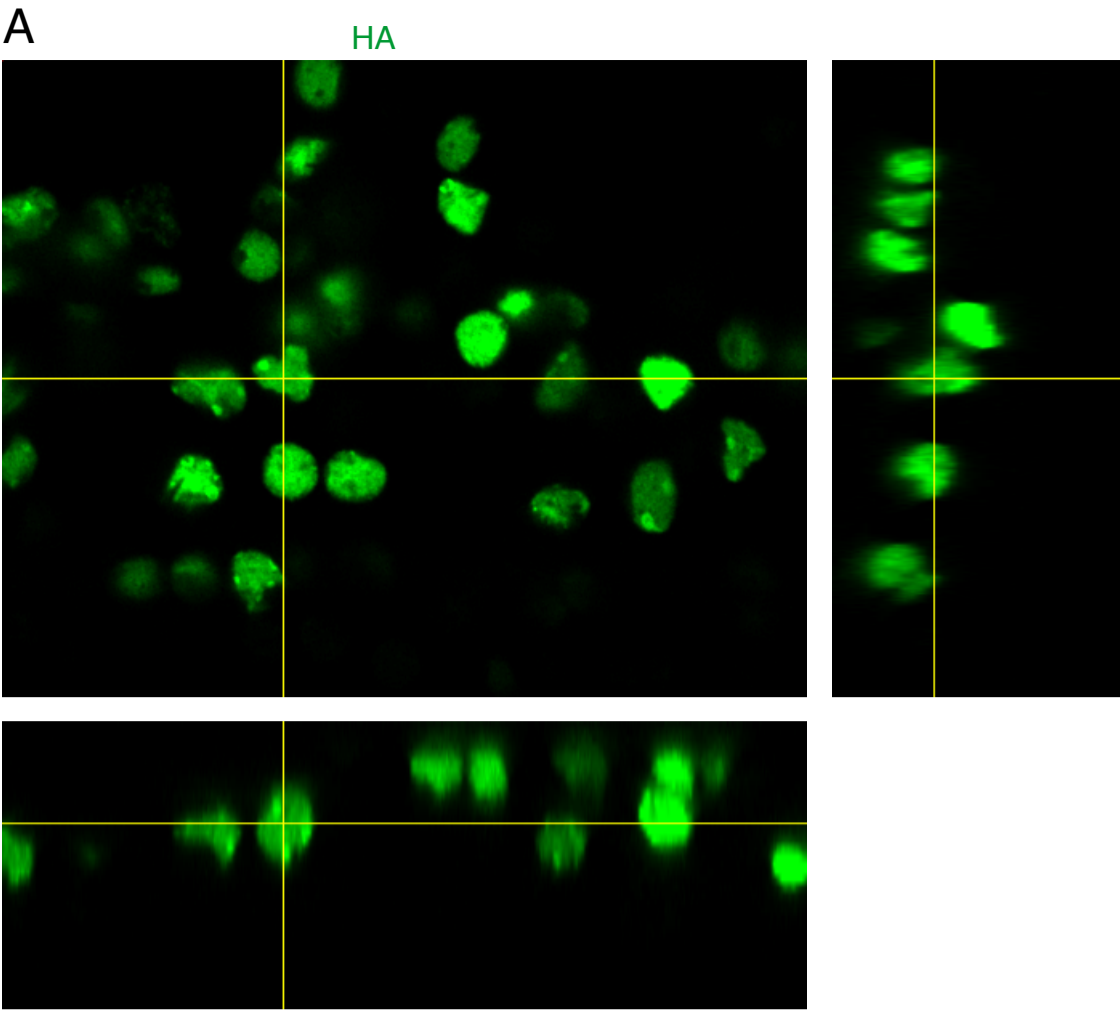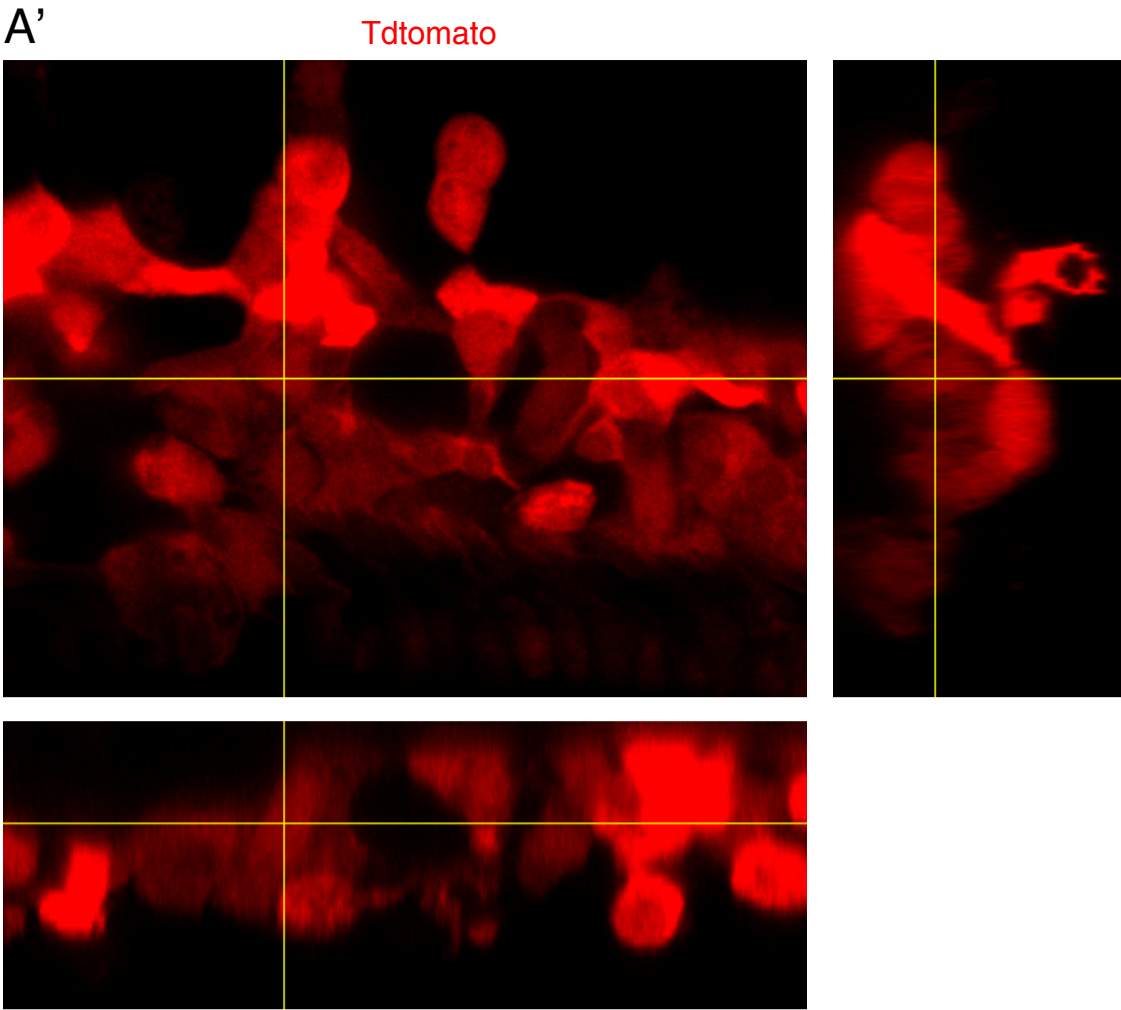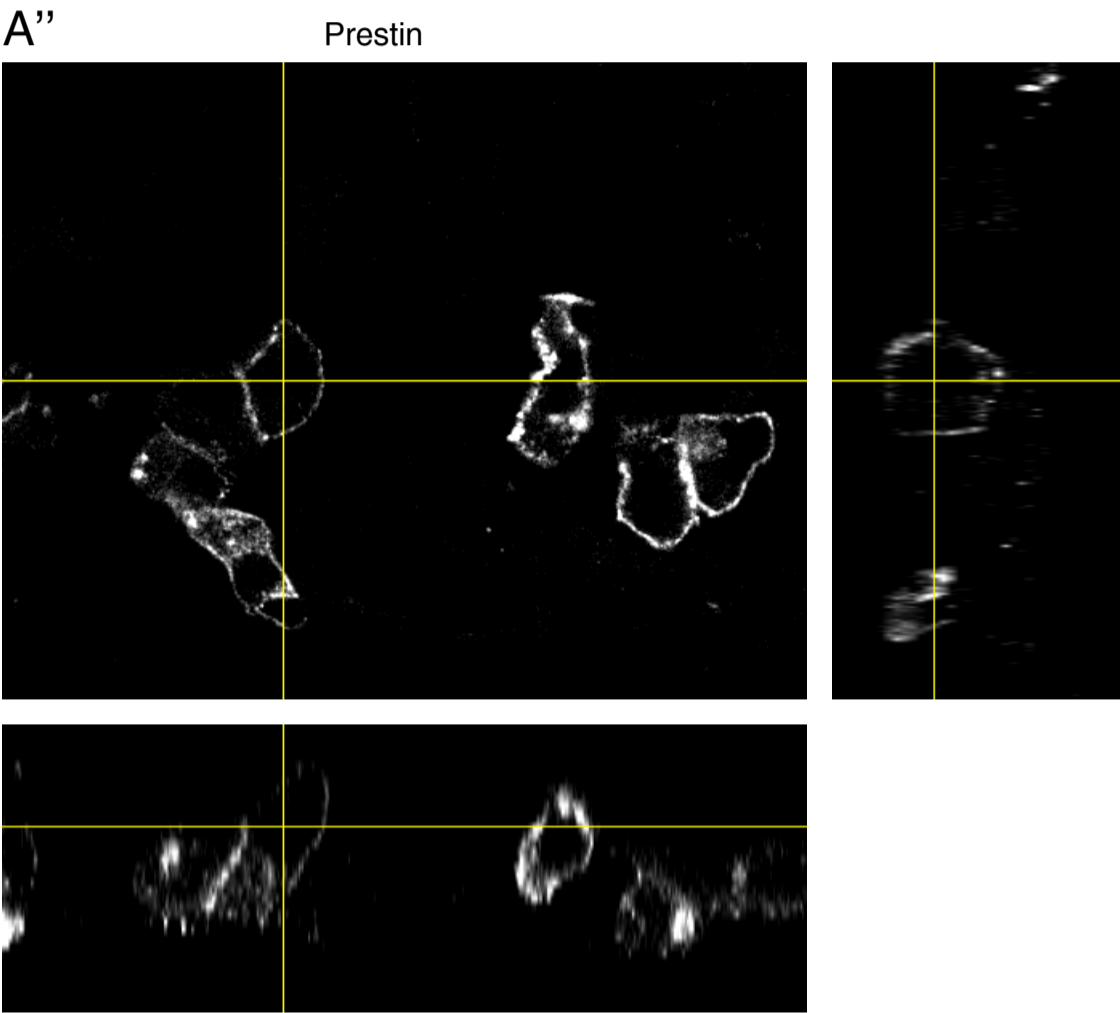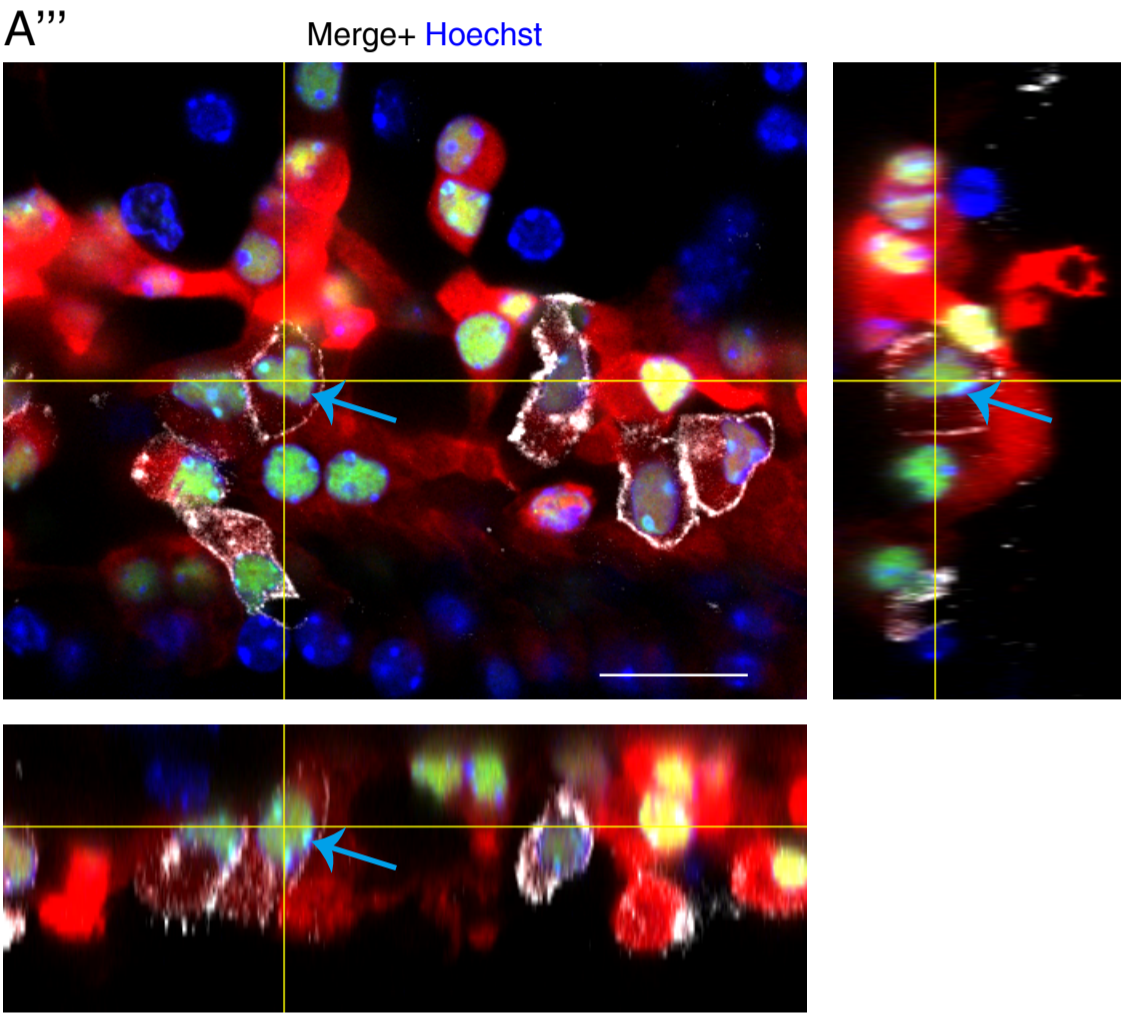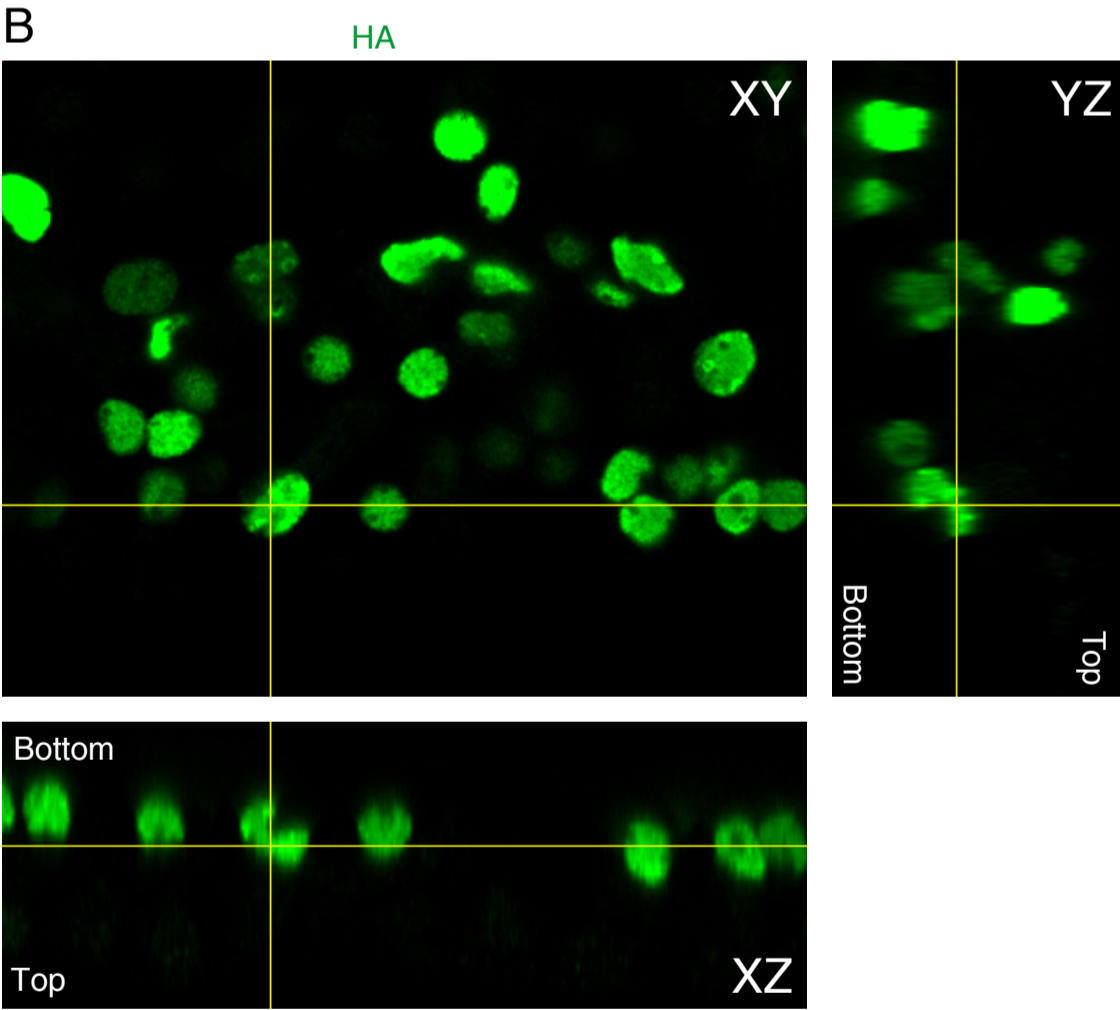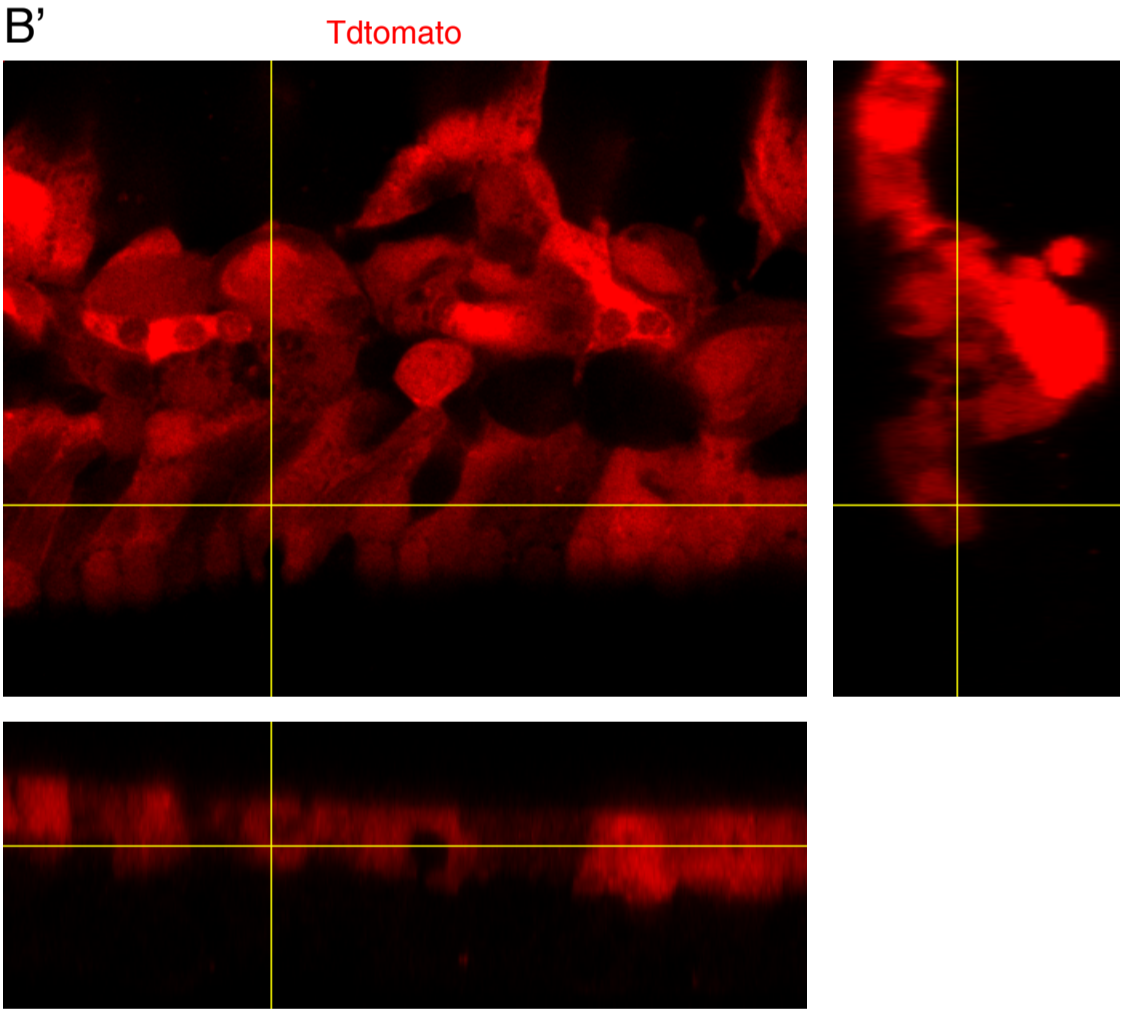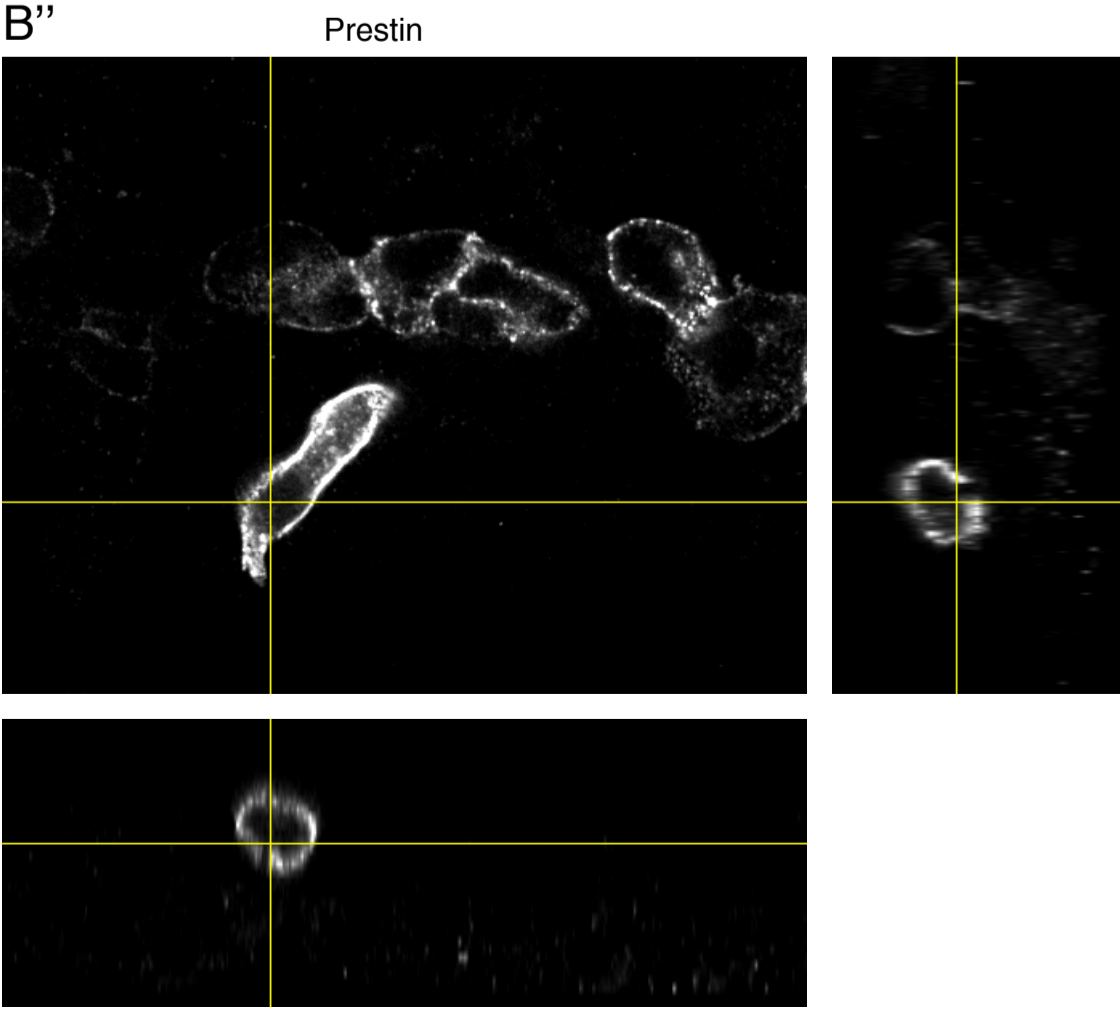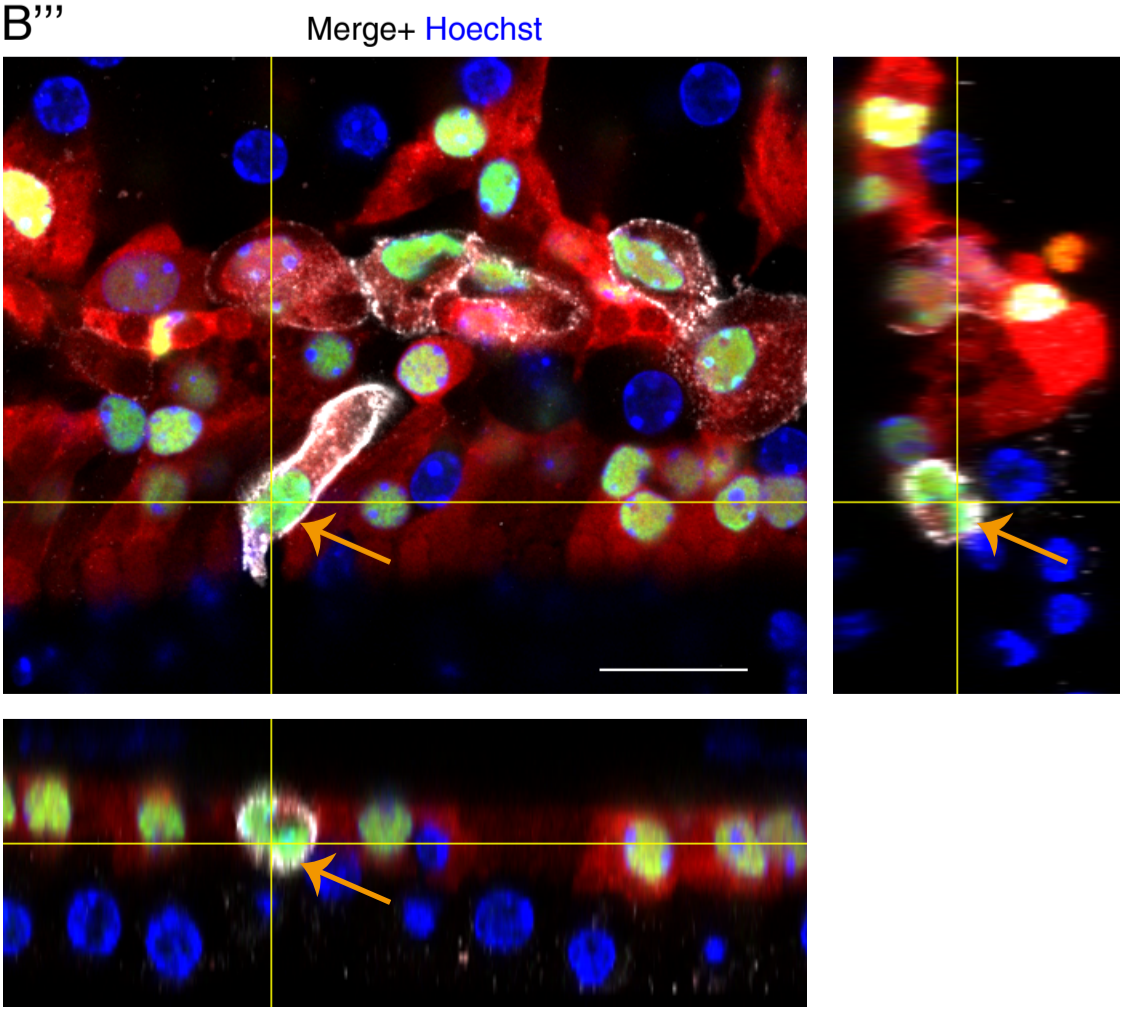

The OHC-like cell in SC layer

Supplement: supp [file elife-66547-supp-v1.zip › elife_poa_e66547_Figure_4_figure_supplement_1.pdf]

Figure 4-figure supplement 2

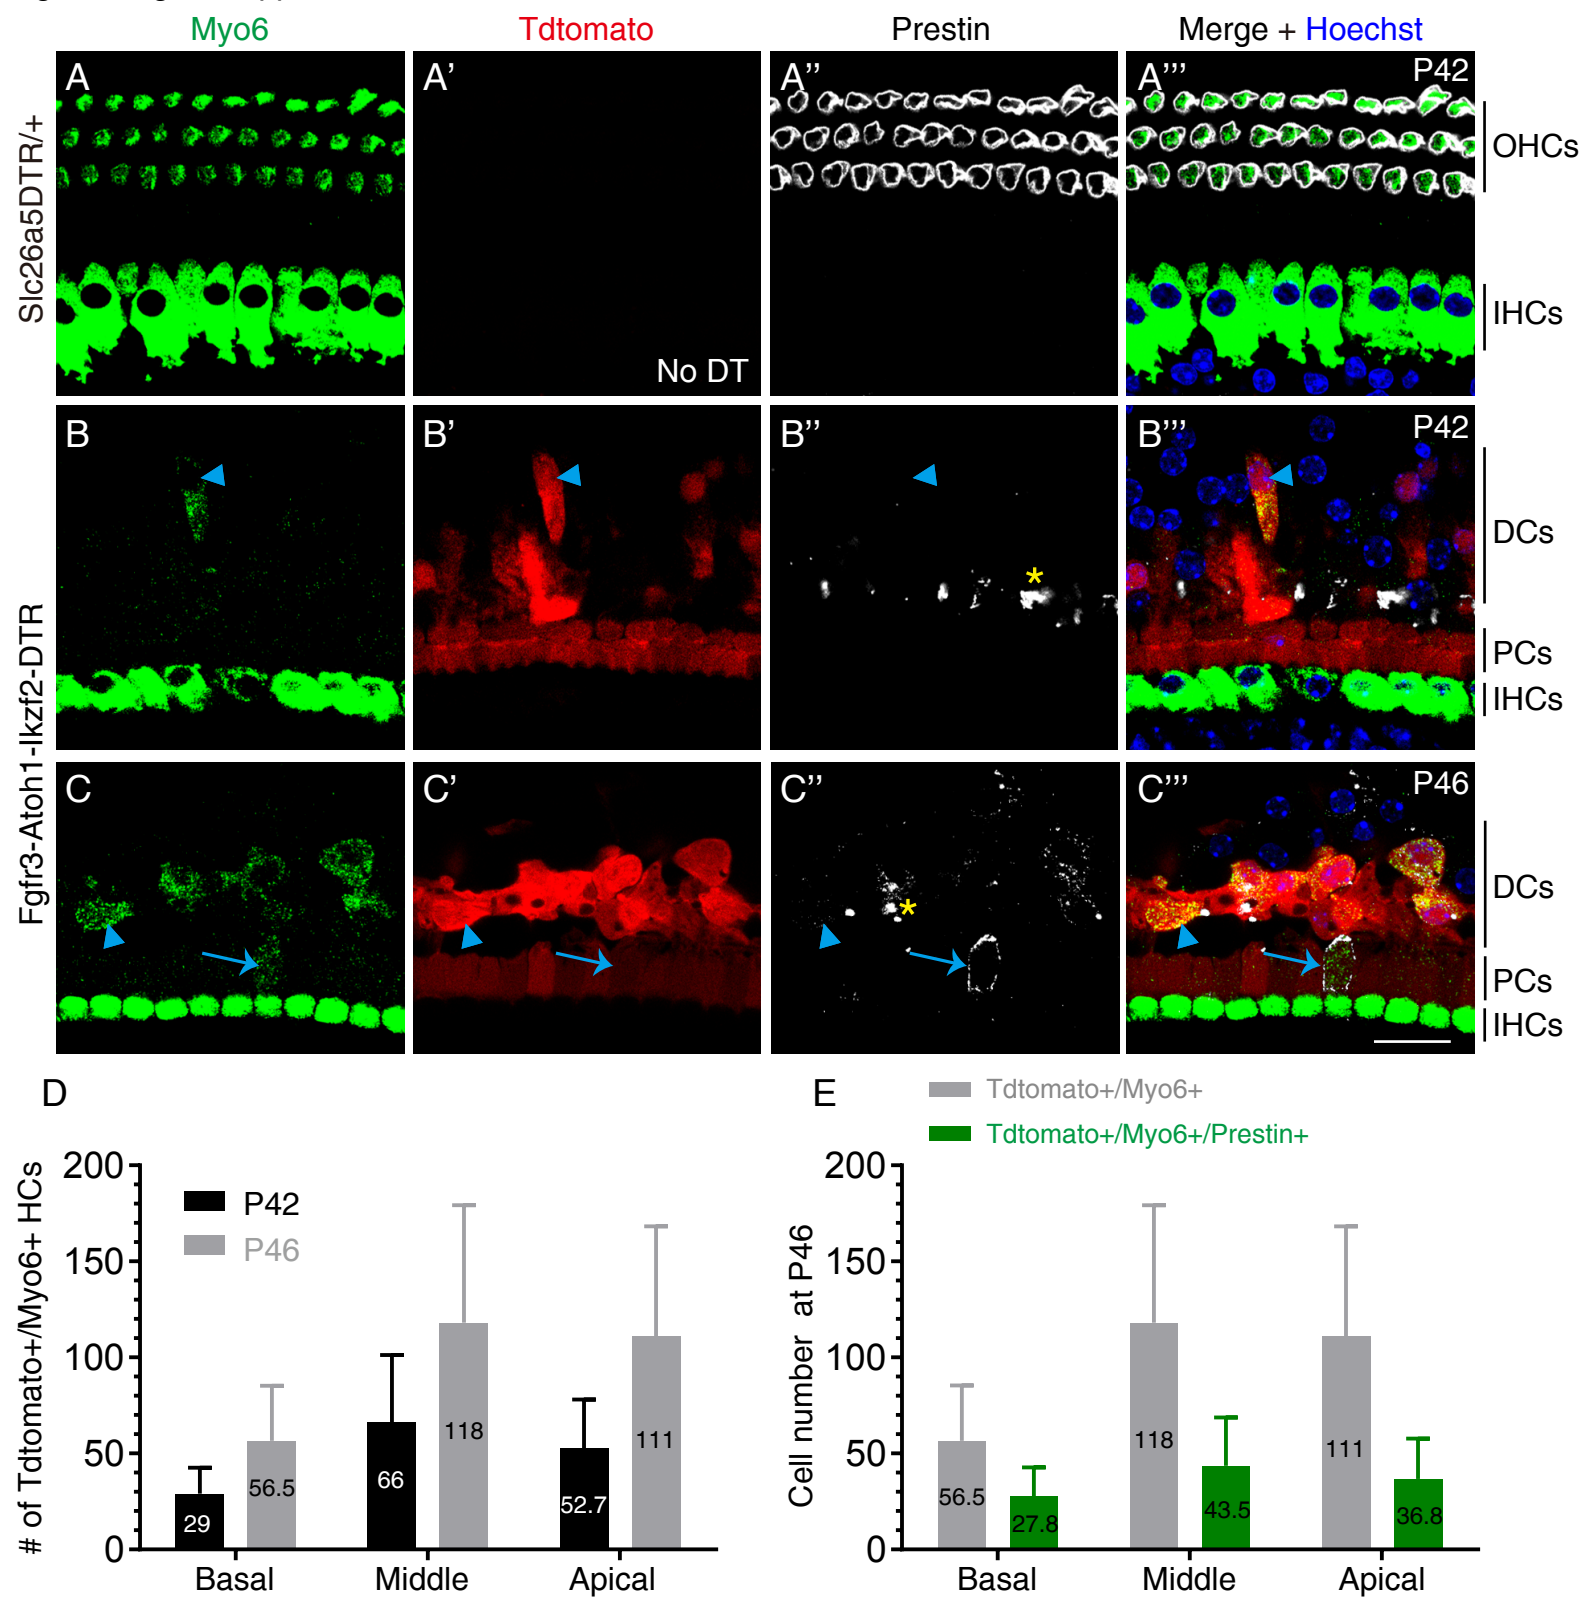

Supplement: supp [file elife-66547-supp-v1.zip › elife_poa_e66547_Figure_4_figure_supplement_2.pdf]

Figure 6-figure supplement 1

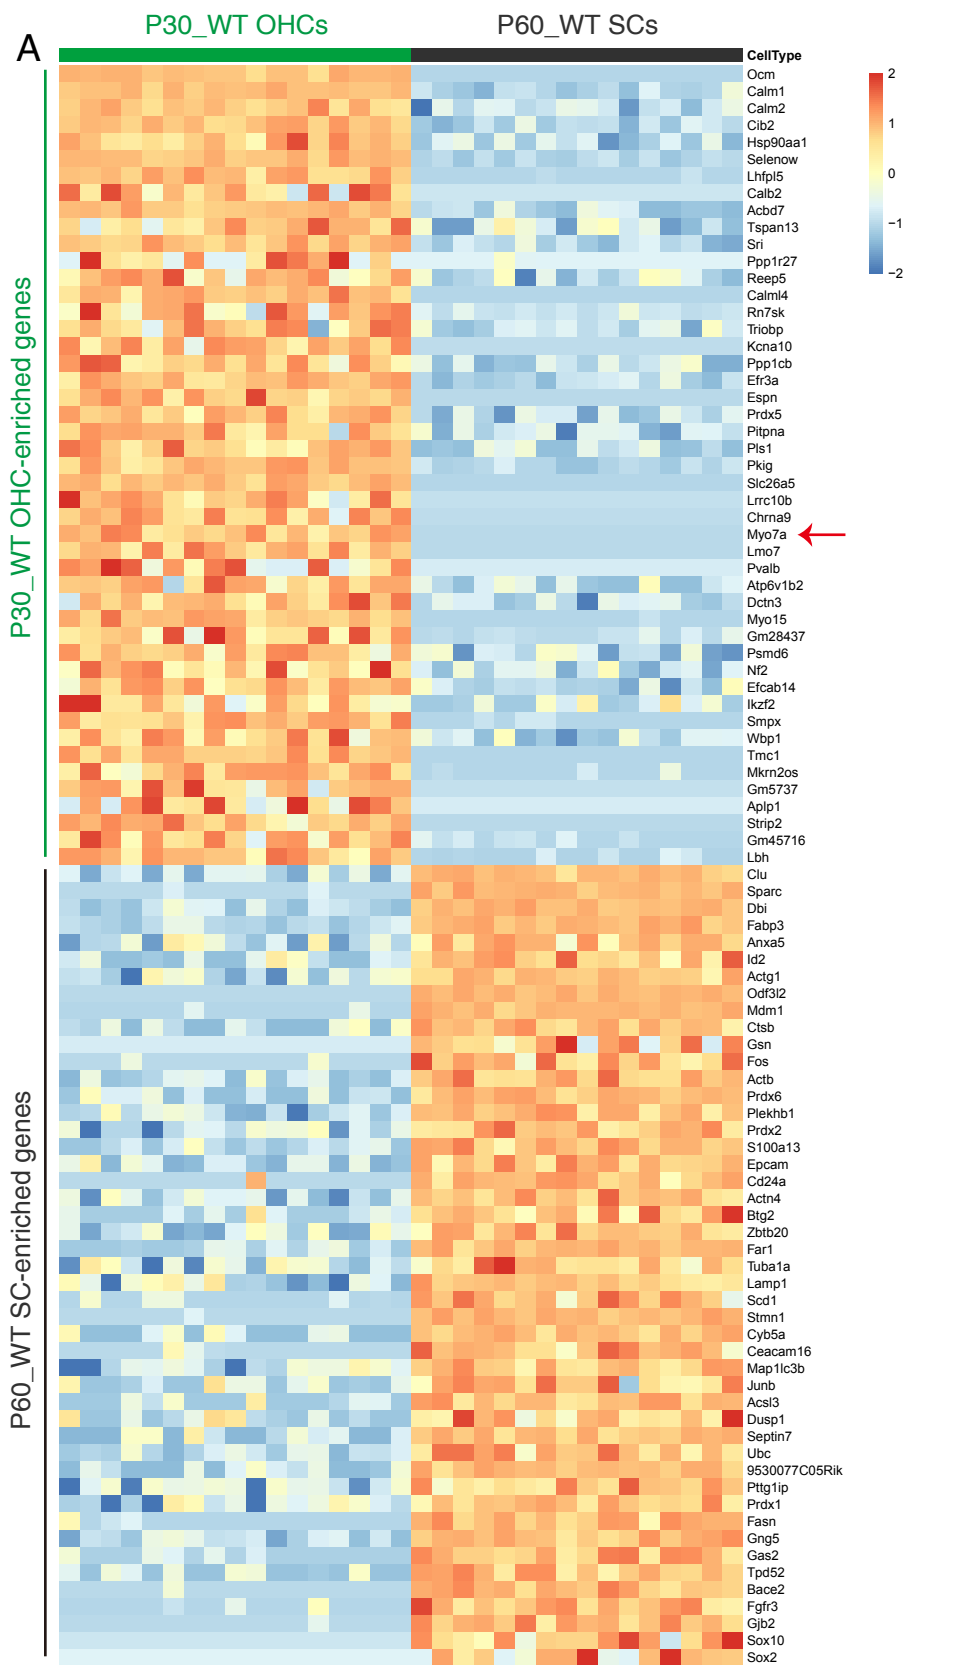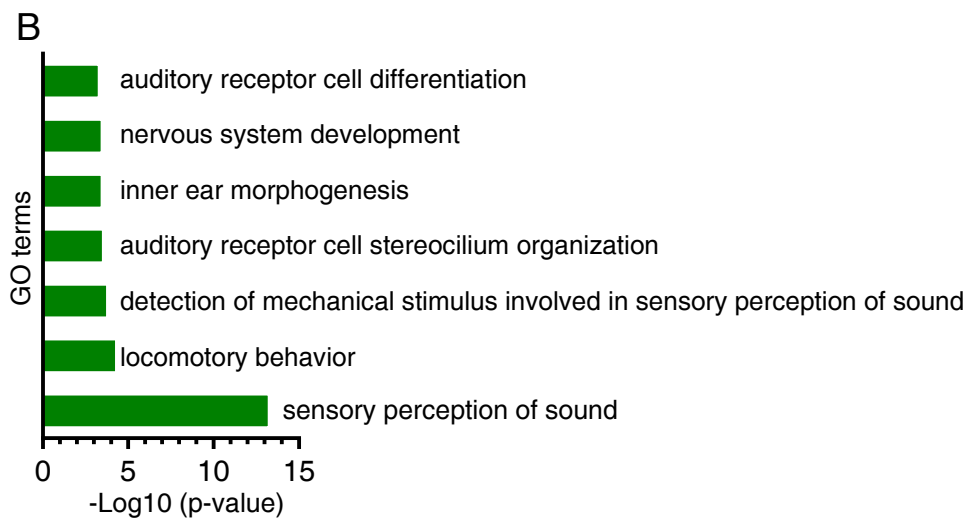

Supplement: supp [file elife-66547-supp-v1.zip › elife_poa_e66547_Figure_6_figure_supplement_1.pdf]

Figure 6-figure supplement 3

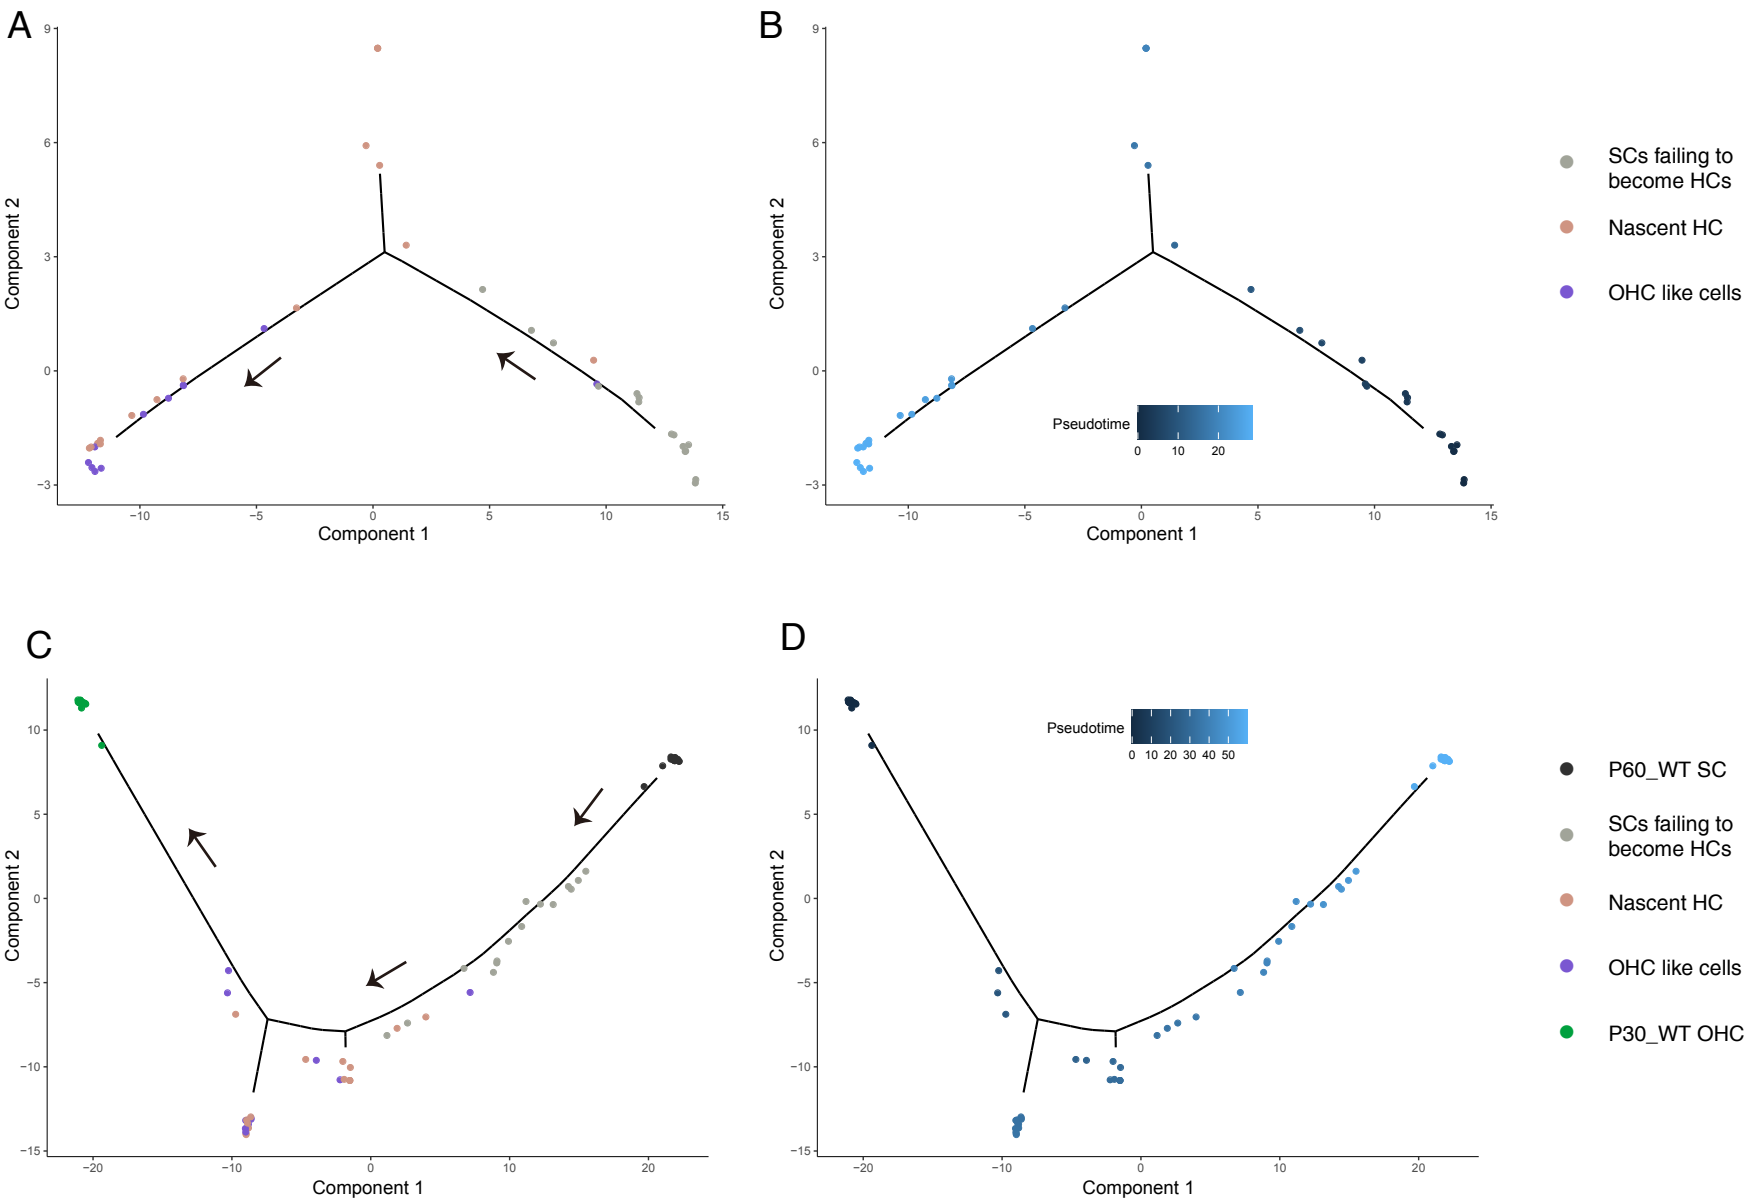

Supplement: supp [file elife-66547-supp-v1.zip › elife_poa_e66547_Figure_6_figure_supplement_3.pdf]

Figure 6-figure supplement 4  
Slc26a5-DTR/+ (no DT)

TdTomato + Prestin + Hoechst

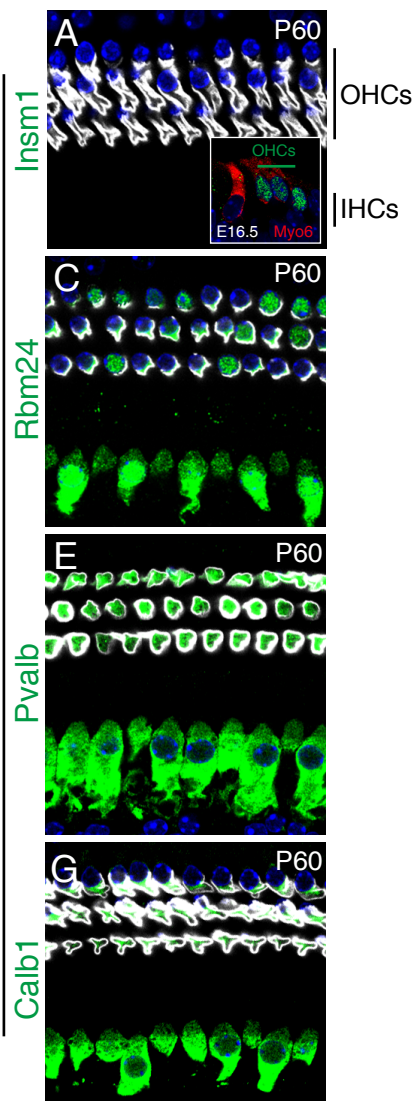

Fgfr3-Atoh1-Ikzf2-DTR

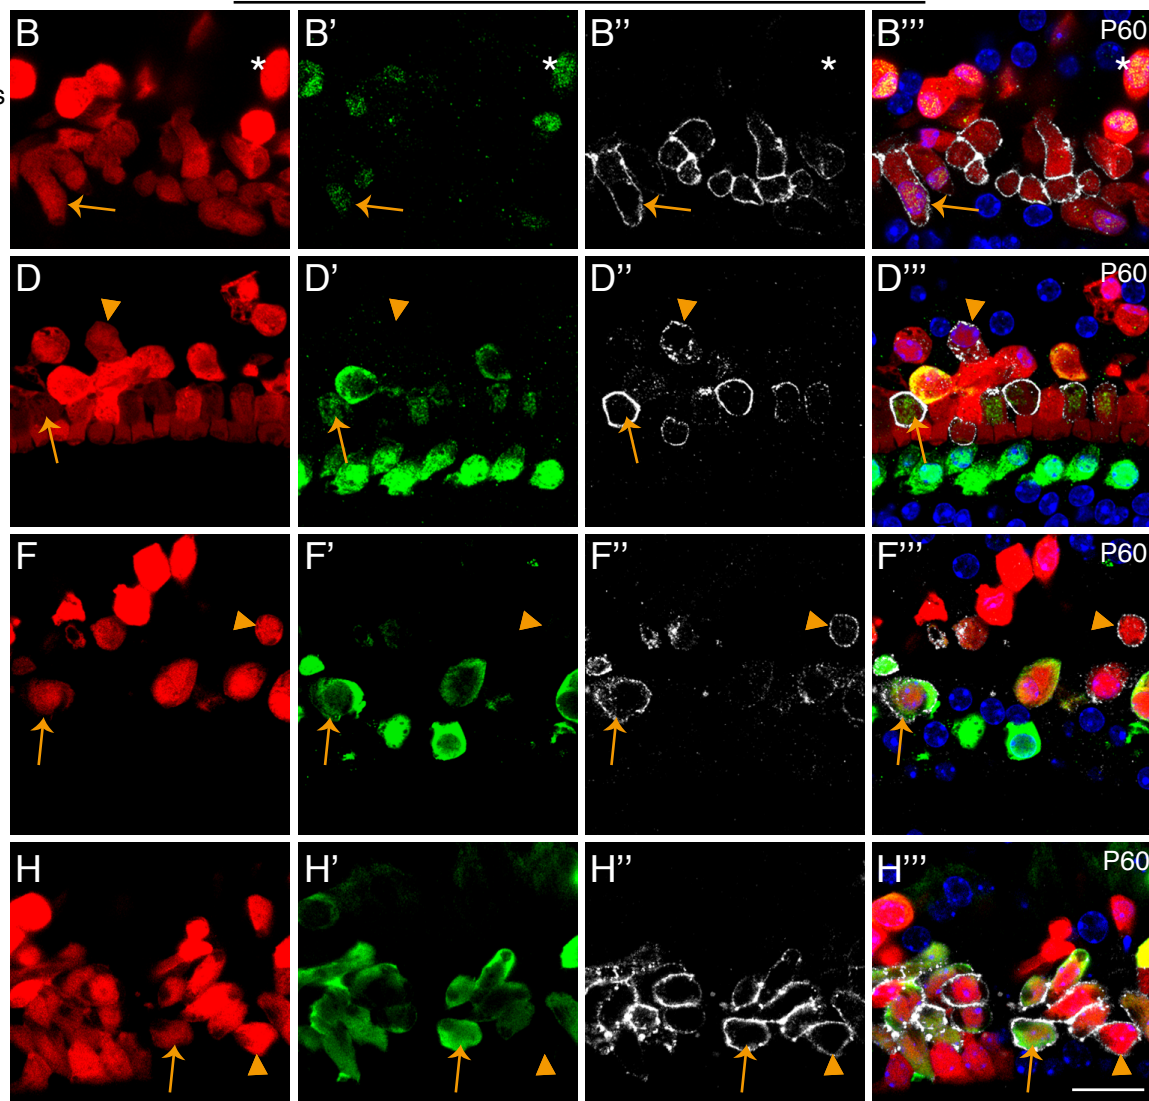

Supplement: supp [file elife-66547-supp-v1.zip › elife_poa_e66547_Figure_6_figure_supplement_4.pdf]

Figure 6-figure supplement 5

A

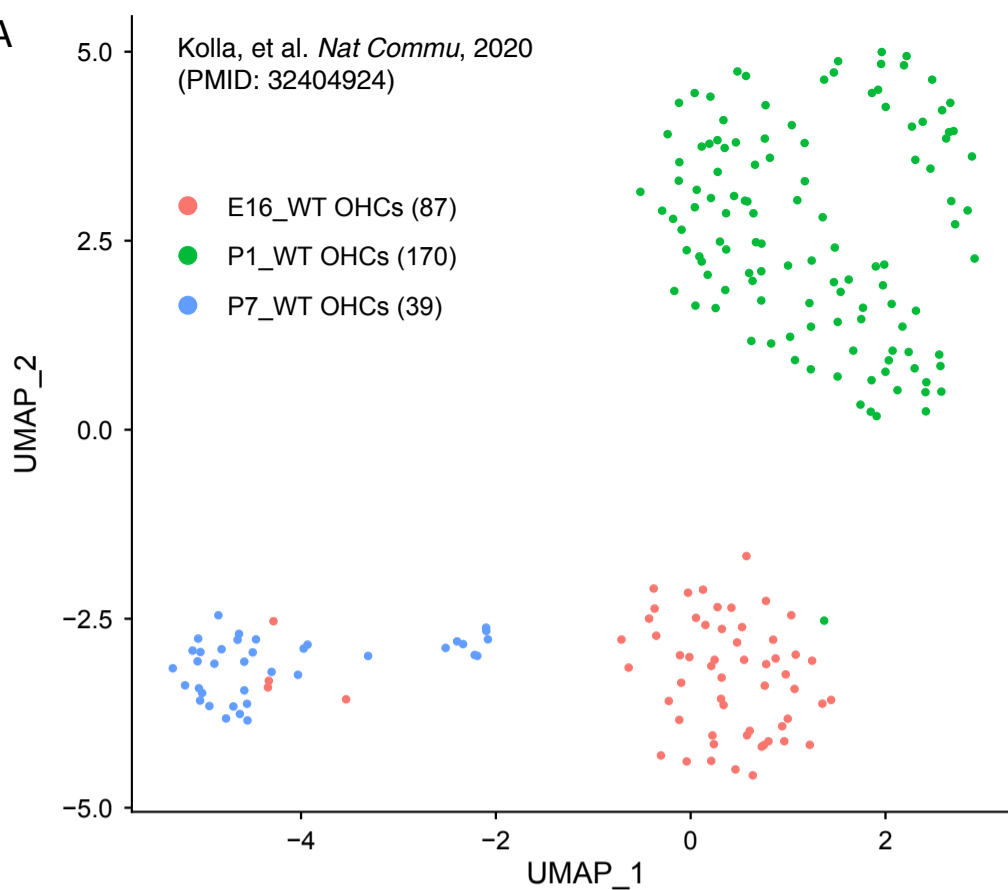

B

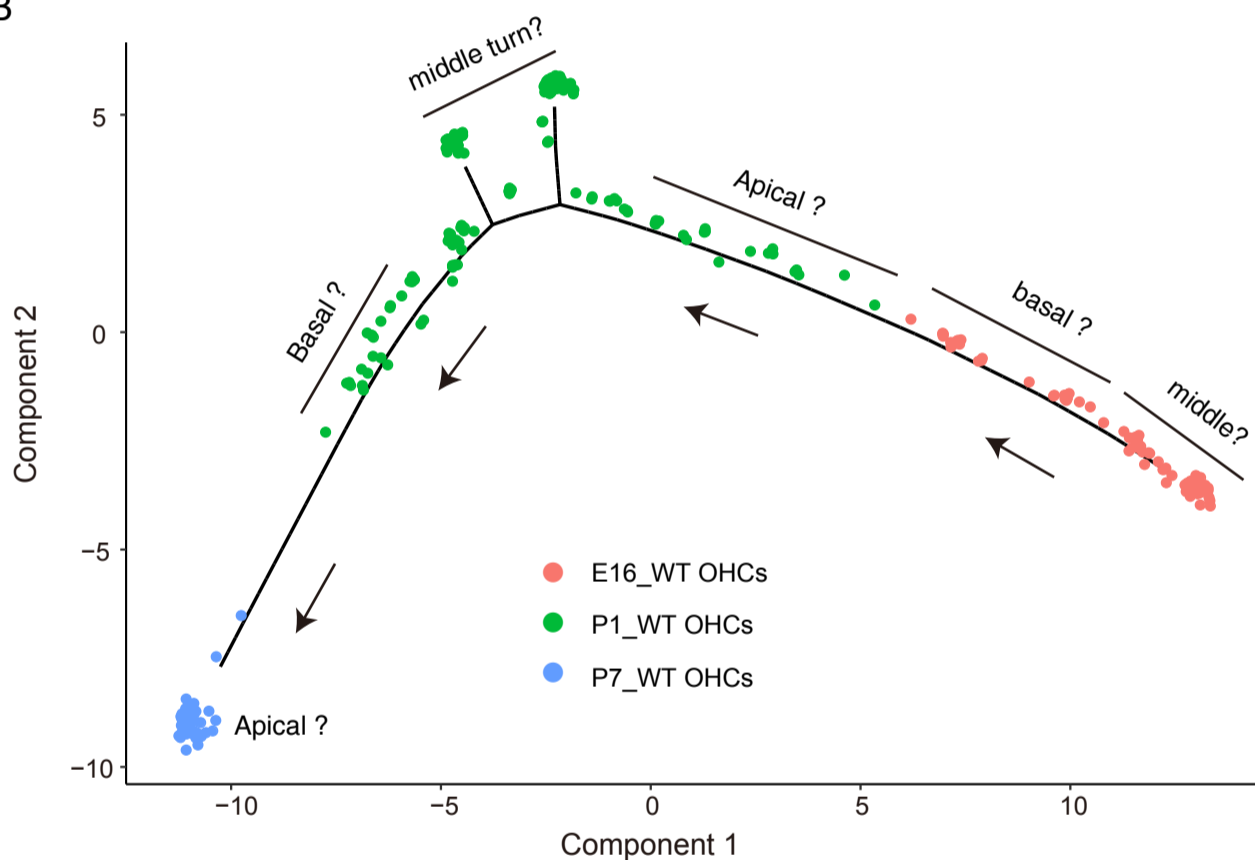

B'

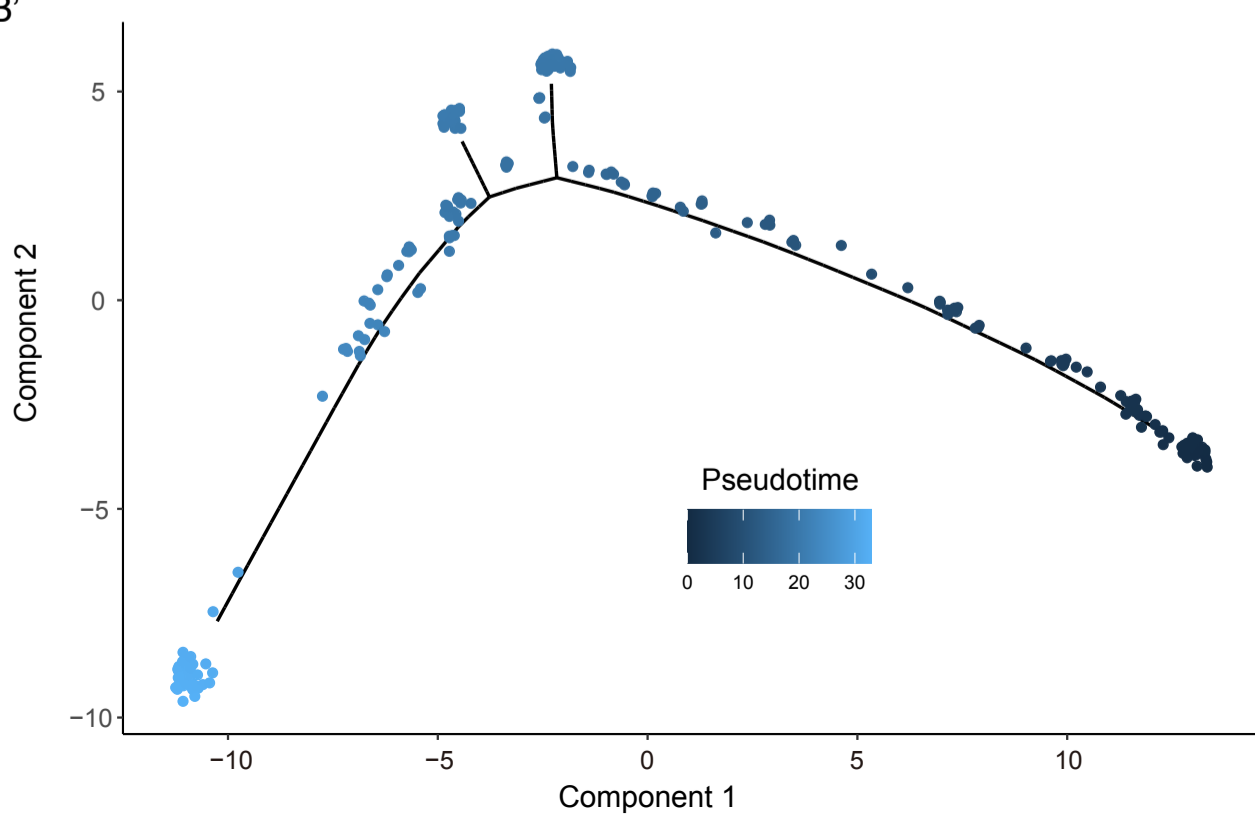

Supplement: supp [file elife-66547-supp-v1.zip › elife_poa_e66547_Figure_6_figure_supplement_5.pdf]

Figure 6-figure supplement 6

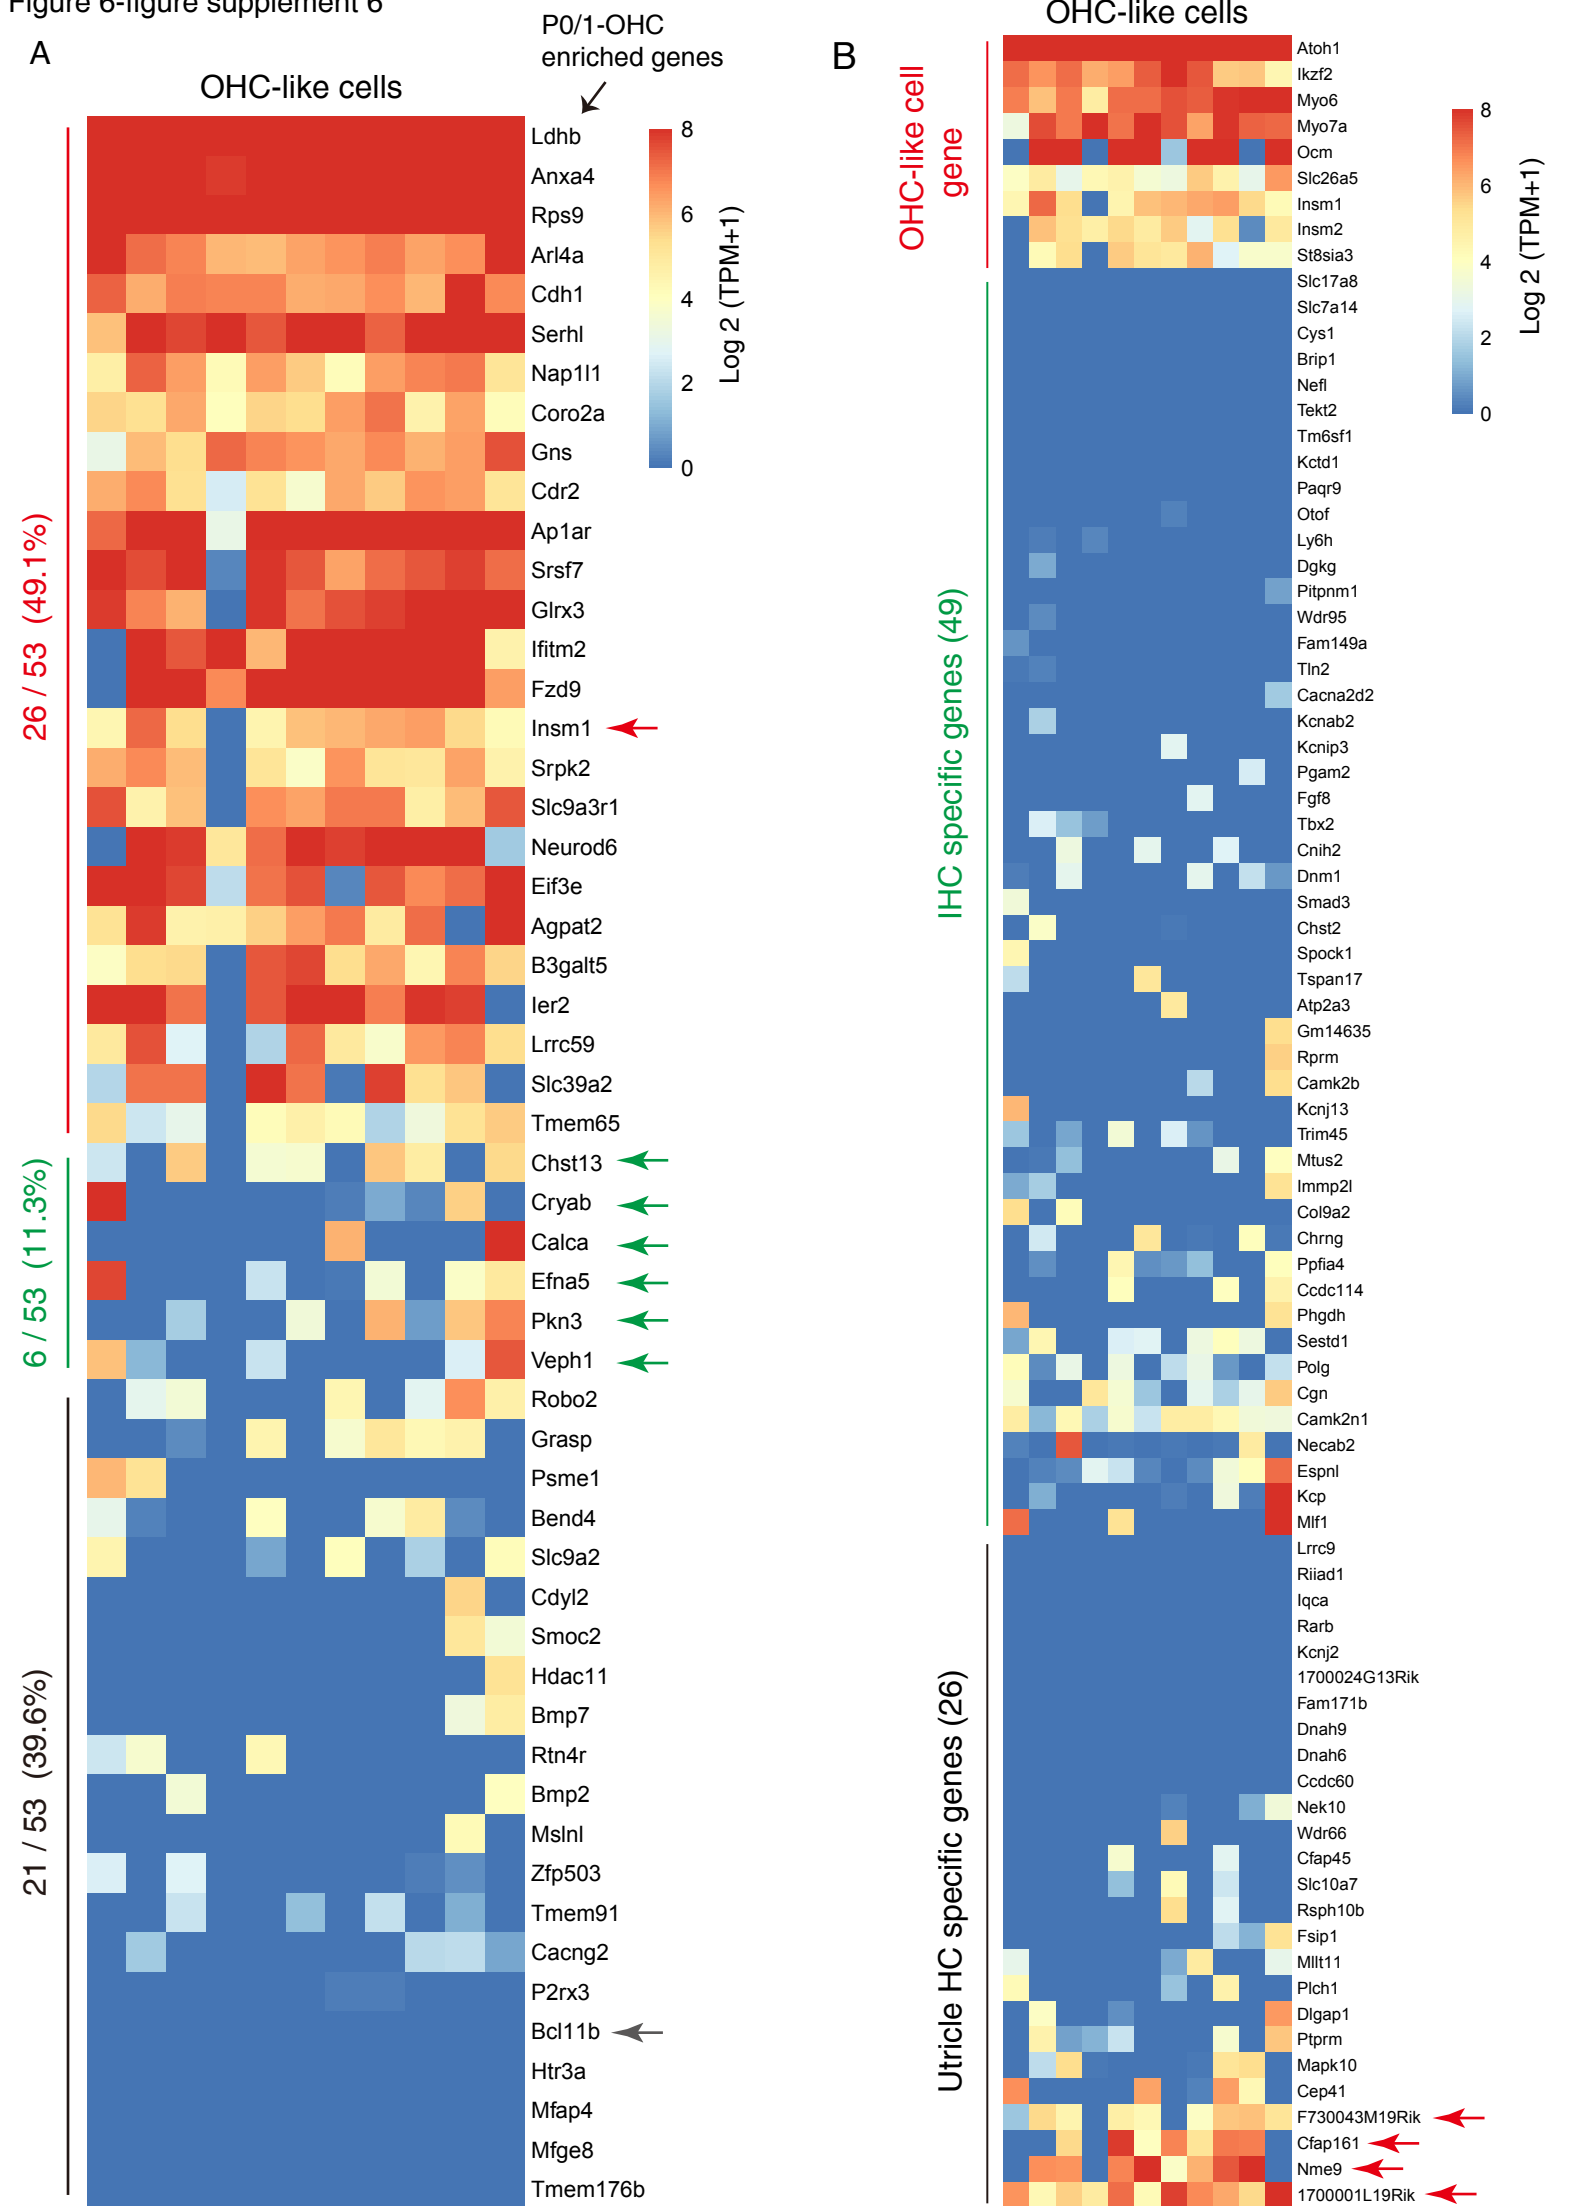

Supplement: supp [file elife-66547-supp-v1.zip › elife_poa_e66547_Figure_6_figure_supplement_6.pdf]

Figure 6-figure supplement 7

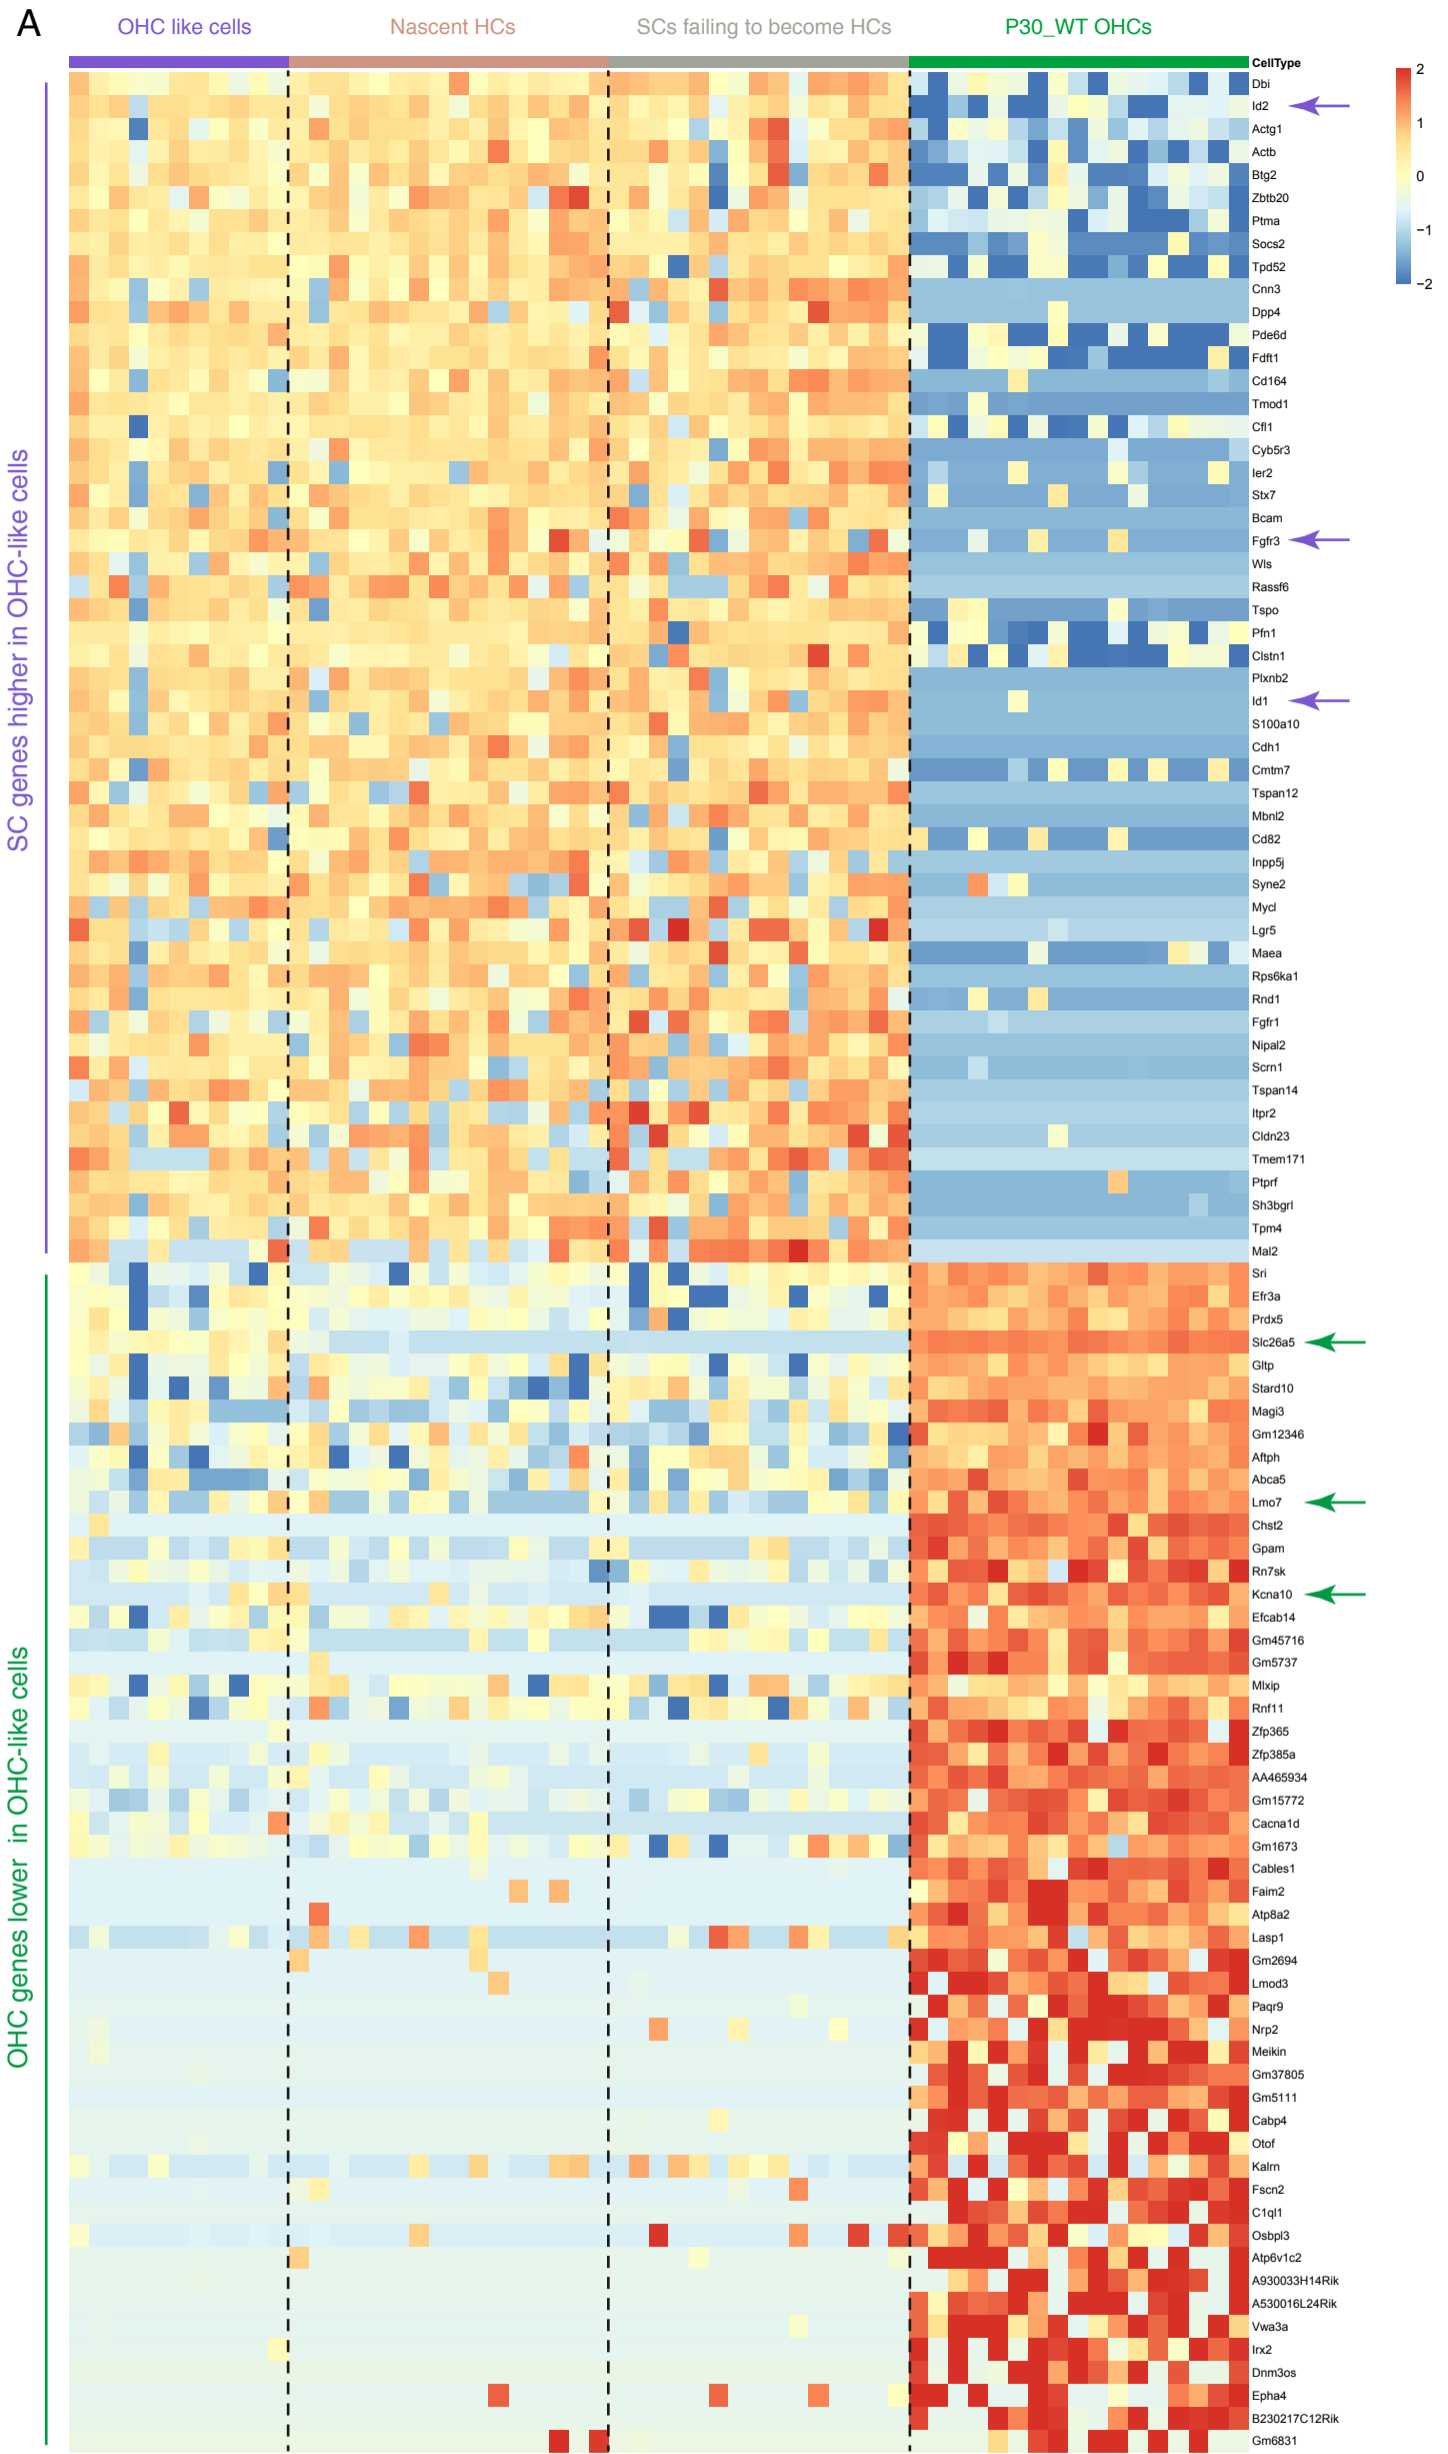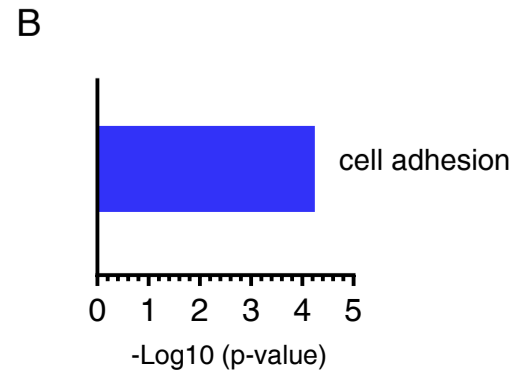

Supplement: supp [file elife-66547-supp-v1.zip › elife_poa_e66547_Figure_6_figure_supplement_7.pdf]

Figure 6-figure supplement 2

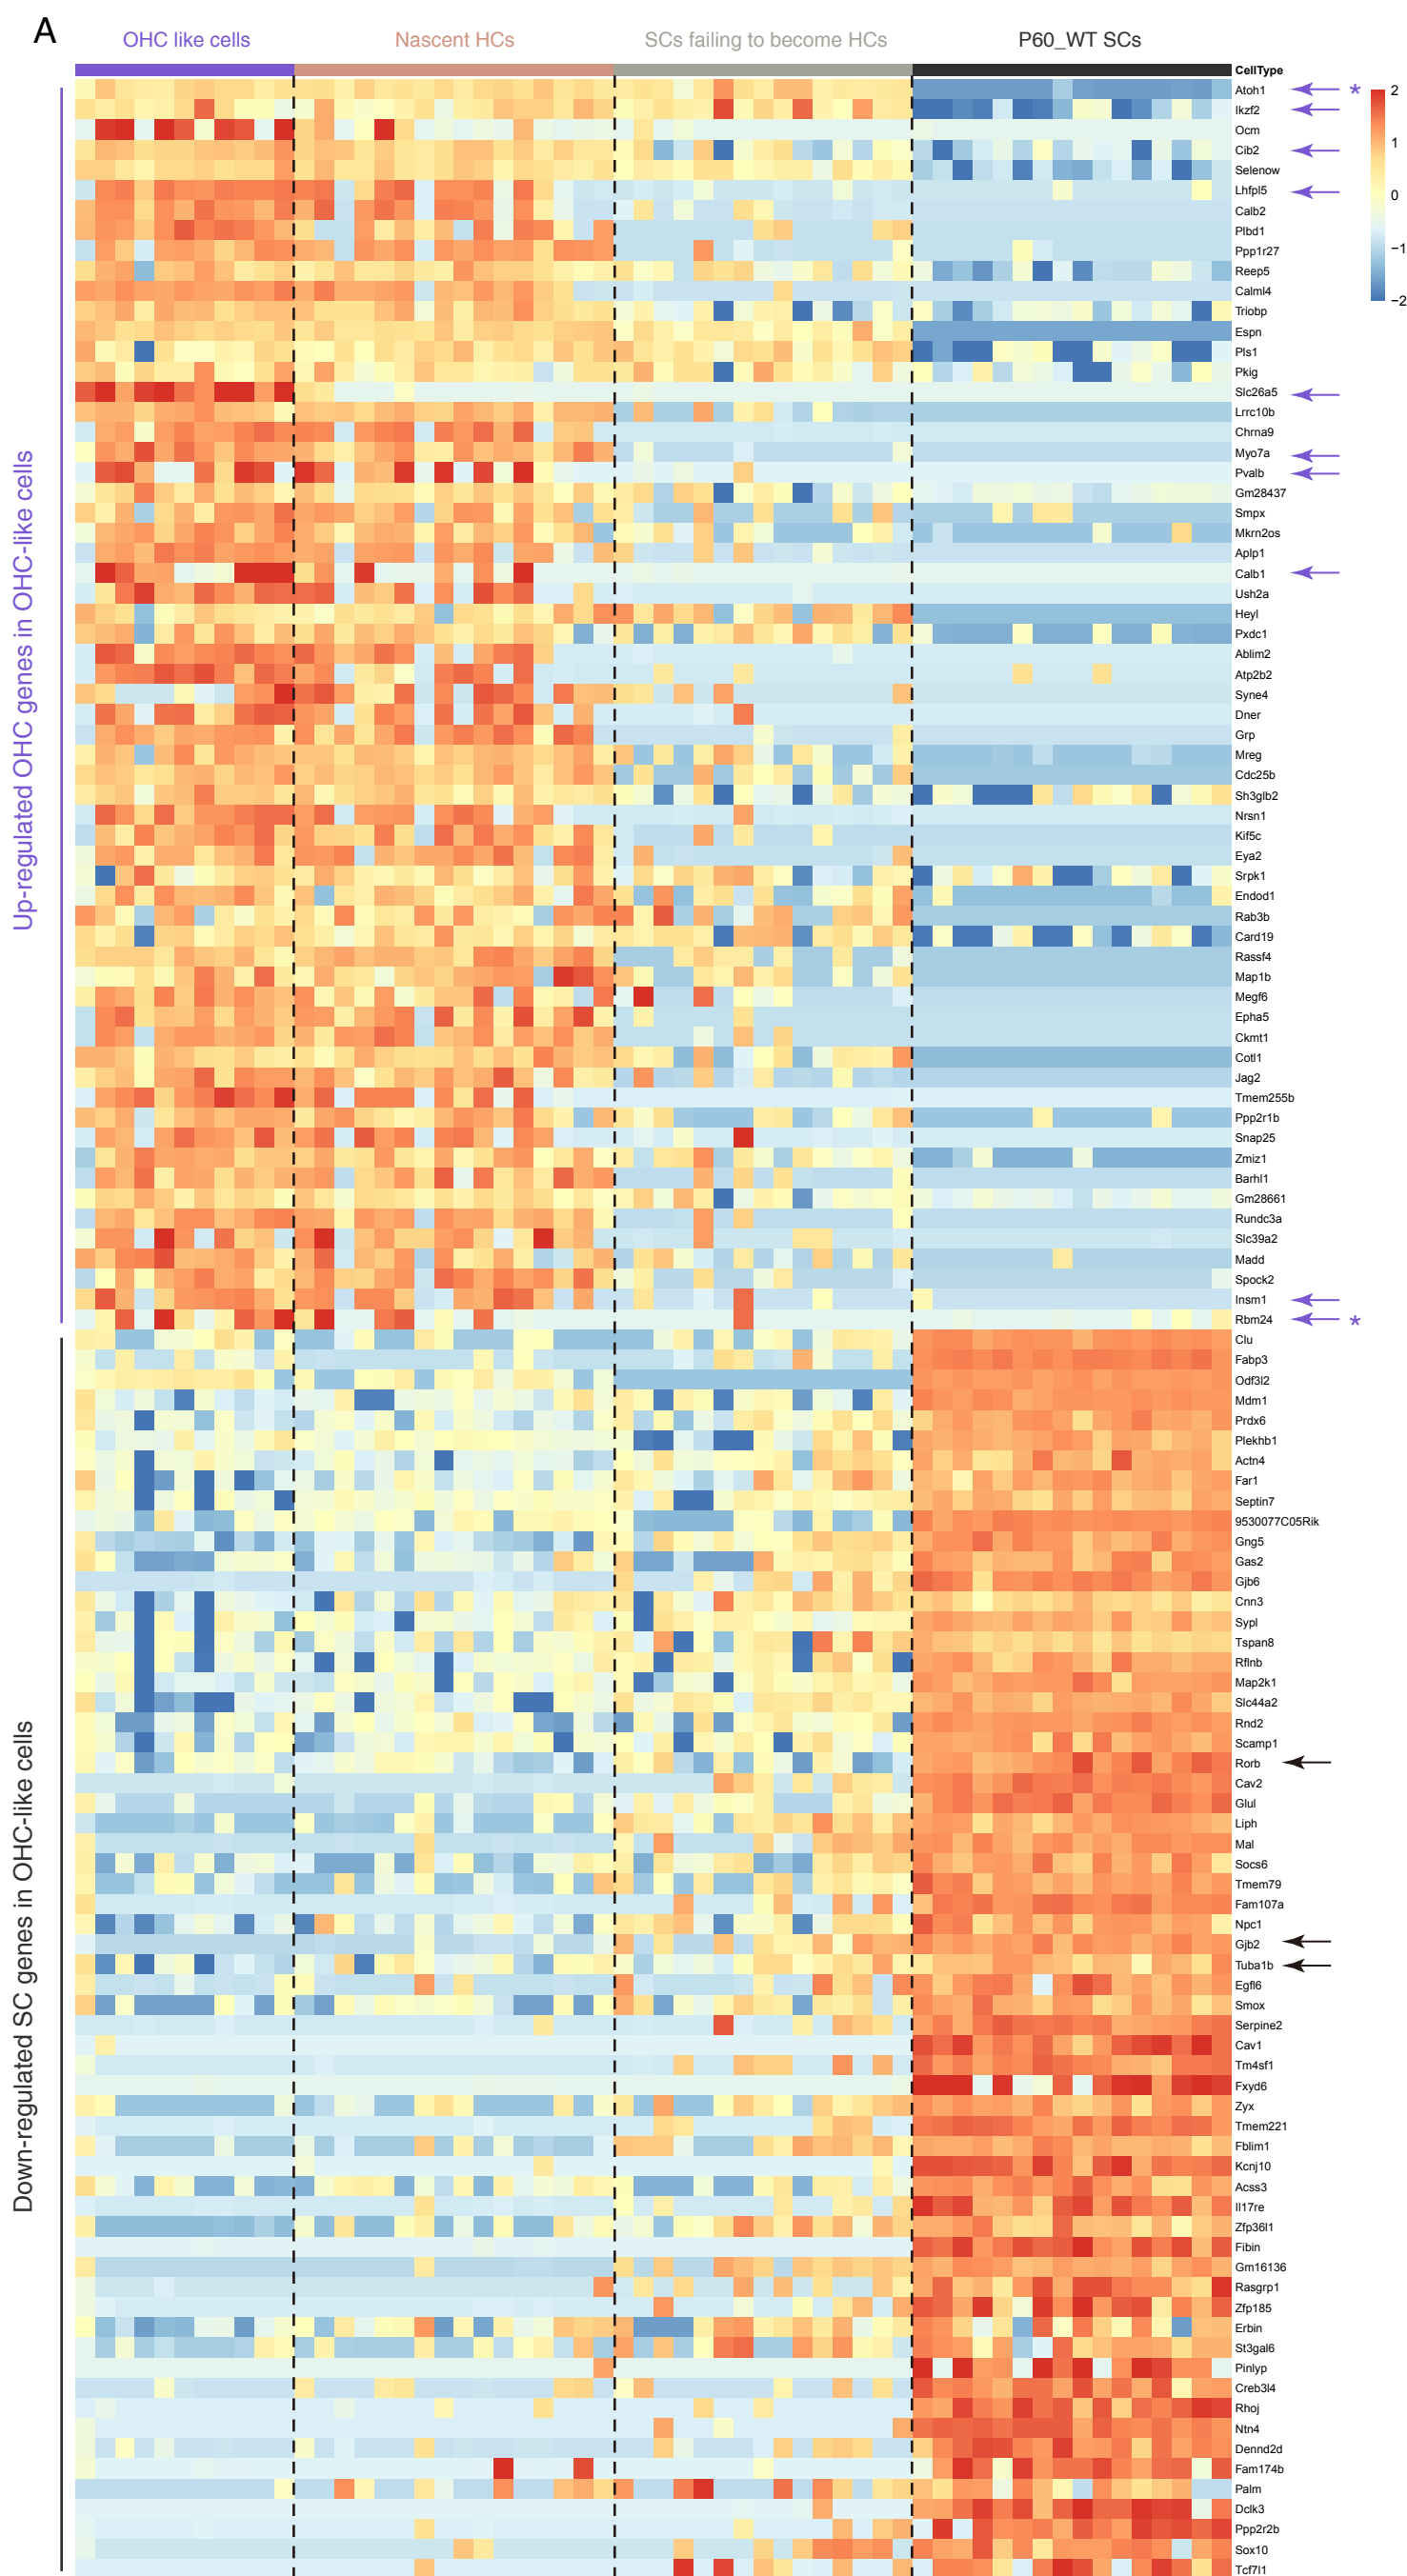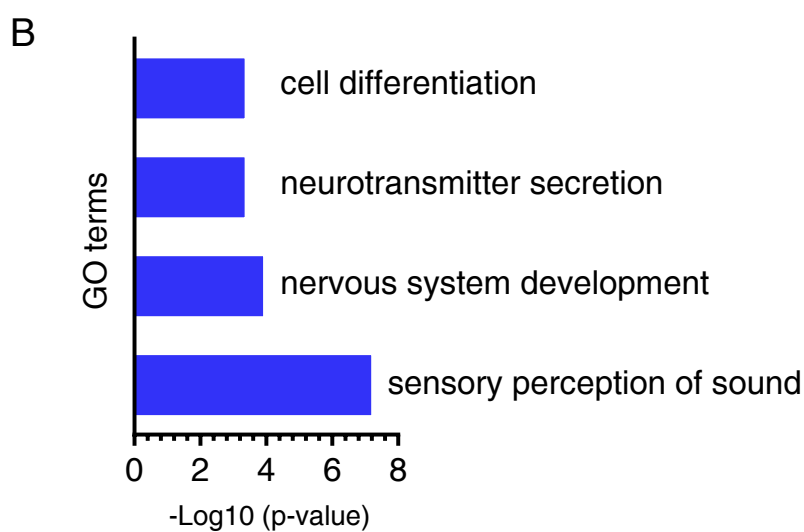

Supplement: supp [file elife_poa_e66547_Figure_6_figure_supplement_2.pdf › elife_poa_e66547_Figure_6_figure_supplement_2.pdf]
